# Supplementary material for: PlantRep: a resource of plant repeats
Source: Research Square preprint supplement (doi:10.21203/rs.3.rs-498874/v1), 2021-05-10
Supplement: Supplementary file 3 [file 0182dd33d8b899b73578b4f8.xlsx]

## Sheet: 525编号
1	Cyanidioschyzon merolae	1_Cyanidioschyzon_merolae
2	Chondrus crispus	2_Chondrus_crispus
3	Chloropicon primus	3_Chloropicon_primus
4	Edaphochlamys debaryana	4_Edaphochlamys_debaryana
5	Bathycoccus prasinos	5_Bathycoccus_prasinos
6	Ostreococcus tauri	6_Ostreococcus_tauri
7	Ostreococcus sp. 'lucimarinus'	7_Ostreococcus_sp._'lucimarinus'
8	Micromonas	8_Micromonas
9	Micromonas commoda	9_Micromonas_commoda
10	Micromonas pusilla	10_Micromonas_pusilla
11	Bathycoccus	11_Bathycoccus
12	unclassified Mamiellophyceae	12_unclassified_Mamiellophyceae
13	Cymbomonas tetramitiformis	13_Cymbomonas_tetramitiformis
14	Chlamydomonas	14_Chlamydomonas
15	Chlamydomonas applanata	15_Chlamydomonas_applanata
16	Chlamydomonas asymmetrica	16_Chlamydomonas_asymmetrica
17	Chlamydomonas debaryana	17_Chlamydomonas_debaryana
18	Chlamydomonas eustigma	18_Chlamydomonas_eustigma
19	Chlamydomonas reinhardtii	19_Chlamydomonas_reinhardtii
20	Chlamydomonas sphaeroides	20_Chlamydomonas_sphaeroides
21	Chloromonas	21_Chloromonas
22	Eudorina	22_Eudorina
23	Gonium pectorale	23_Gonium_pectorale
24	Volvox carteri	24_Volvox_carteri
25	Yamagishiella unicocca	25_Yamagishiella_unicocca
26	Haematococcus	26_Haematococcus
27	Haematococcus lacustris	27_Haematococcus_lacustris
28	Haematococcus pluvialis	28_Haematococcus_pluvialis
29	Characiochloris	29_Characiochloris
30	Dunaliella	30_Dunaliella
31	Dunaliella salina	31_Dunaliella_salina
32	Tetrabaena socialis	32_Tetrabaena_socialis
33	Mychonastes homosphaera	33_Mychonastes_homosphaera
34	Messastrum gracile	34_Messastrum_gracile
35	Monoraphidium	35_Monoraphidium
36	Monoraphidium neglectum	36_Monoraphidium_neglectum
37	Raphidocelis subcapitata	37_Raphidocelis_subcapitata
38	Desmodesmus armatus	38_Desmodesmus_armatus
39	Scenedesmus	39_Scenedesmus
40	Scenedesmus quadricauda	40_Scenedesmus_quadricauda
41	Scenedesmus vacuolatus	41_Scenedesmus_vacuolatus
42	Coelastrella	42_Coelastrella
43	Tetradesmus obliquus	43_Tetradesmus_obliquus
44	Tetraselmis striata	44_Tetraselmis_striata
45	Picocystis	45_Picocystis
46	Ulva mutabilis	46_Ulva_mutabilis
47	Ulva prolifera	47_Ulva_prolifera
48	Parachlorella kessleri	48_Parachlorella_kessleri
49	Helicosporidium	49_Helicosporidium
50	Nannochloris	50_Nannochloris
51	Auxenochlorella pyrenoidosa	51_Auxenochlorella_pyrenoidosa
52	Auxenochlorella protothecoides	52_Auxenochlorella_protothecoides
53	Micractinium conductrix	53_Micractinium_conductrix
54	Chlorella sorokiniana	54_Chlorella_sorokiniana
55	Chlorella variabilis	55_Chlorella_variabilis
56	Chlorella vulgaris	56_Chlorella_vulgaris
57	Prototheca bovis	57_Prototheca_bovis
58	Prototheca ciferrii	58_Prototheca_ciferrii
59	Prototheca cutis	59_Prototheca_cutis
60	Prototheca stagnorum	60_Prototheca_stagnorum
61	Prototheca wickerhamii	61_Prototheca_wickerhamii
62	Prototheca zopfii	62_Prototheca_zopfii
63	Chloroidium	63_Chloroidium
64	Chlorella	64_Chlorella
65	Picochlorum	65_Picochlorum
66	Botryococcus braunii	66_Botryococcus_braunii
67	Coccomyxa	67_Coccomyxa
68	Coccomyxa subellipsoidea C-169	68_Coccomyxa_subellipsoidea_C-169
69	unclassified Trebouxiophyceae	69_unclassified_Trebouxiophyceae
70	Trebouxia	70_Trebouxia
71	Trebouxia gelatinosa	71_Trebouxia_gelatinosa
72	Chlorokybus atmophyticus	72_Chlorokybus_atmophyticus
73	Mesostigma viride	73_Mesostigma_viride
74	Klebsormidium nitens	74_Klebsormidium_nitens
75	Chara braunii	75_Chara_braunii
76	Mesotaenium endlicherianum	76_Mesotaenium_endlicherianum
77	Spirogloea muscicola	77_Spirogloea_muscicola
78	Physcomitrella patens	78_Physcomitrella_patens
79	Pleurozium schreberi	79_Pleurozium_schreberi
80	Marchantia inflexa	80_Marchantia_inflexa
81	Marchantia polymorpha	81_Marchantia_polymorpha
82	Selaginella kraussiana	82_Selaginella_kraussiana
83	Selaginella moellendorffii	83_Selaginella_moellendorffii
84	Selaginella tamariscina	84_Selaginella_tamariscina
85	Adiantum capillus-veneris	85_Adiantum_capillus-veneris
86	Azolla filliculoides	86_Azolla_filliculoides
87	Salvinia cucullata	87_Salvinia_cucullata
88	Ginkgo biloba	88_Ginkgo_biloba
89	Gnetum montanum	89_Gnetum_montanum
90	Picea abies	90_Picea_abies
91	Picea glauca	91_Picea_glauca
92	Pinus taeda	92_Pinus_taeda
93	Pinus lambertiana	93_Pinus_lambertiana
94	Pseudotsuga menziesii	94_Pseudotsuga_menziesii
95	Sequoiadendron giganteum	95_Sequoiadendron_giganteum
96	Sequoia sempervirens	96_Sequoia_sempervirens
97	Amborella trichopoda	97_Amborella_trichopoda
98	Nymphaea colorata	98_Nymphaea_colorata
99	Cinnamomum micranthum	99_Cinnamomum_micranthum
100	Persea americana	100_Persea_americana
101	Liriodendron chinense	101_Liriodendron_chinense
102	Magnolia ashei	102_Magnolia_ashei
103	Spirodela polyrhiza	103_Spirodela_polyrhiza
104	Zostera marina	104_Zostera_marina
105	Dioscorea alata	105_Dioscorea_alata
106	Dioscorea rotundata	106_Dioscorea_rotundata
107	Trichopus zeylanicus	107_Trichopus_zeylanicus
108	Xerophyta viscosa	108_Xerophyta_viscosa
109	Asparagus officinalis	109_Asparagus_officinalis
110	Apostasia shenzhenica	110_Apostasia_shenzhenica
111	Gastrodia elata	111_Gastrodia_elata
112	Dendrobium catenatum	112_Dendrobium_catenatum
113	Phalaenopsis aphrodite	113_Phalaenopsis_aphrodite
114	Phalaenopsis equestris	114_Phalaenopsis_equestris
115	Phalaenopsis hybrid cultivar	115_Phalaenopsis_hybrid_cultivar
116	Vanilla planifolia	116_Vanilla_planifolia
117	Cocos nucifera	117_Cocos_nucifera
118	Elaeis guineensis	118_Elaeis_guineensis
119	Elaeis oleifera	119_Elaeis_oleifera
120	Calamus simplicifolius	120_Calamus_simplicifolius
121	Phoenix dactylifera	121_Phoenix_dactylifera
122	Ananas comosus	122_Ananas_comosus
123	Raddia distichophylla	123_Raddia_distichophylla
124	Leersia perrieri	124_Leersia_perrieri
125	Oryza barthii	125_Oryza_barthii
126	Oryza brachyantha	126_Oryza_brachyantha
127	Oryza glaberrima	127_Oryza_glaberrima
128	Oryza glumipatula	128_Oryza_glumipatula
129	Oryza longistaminata	129_Oryza_longistaminata
130	Oryza meridionalis	130_Oryza_meridionalis
131	Oryza meyeriana var. granulata	131_Oryza_meyeriana_var._granulata
132	Oryza punctata	132_Oryza_punctata
133	Oryza rufipogon	133_Oryza_rufipogon
134	Oryza sativa	134_Oryza_sativa
135	Oryza sativa f. spontanea	135_Oryza_sativa_f._spontanea
136	Zizania latifolia	136_Zizania_latifolia
137	Brachypodium distachyon	137_Brachypodium_distachyon
138	Dactylis glomerata	138_Dactylis_glomerata
139	Lolium perenne	139_Lolium_perenne
140	Hordeum bulbosum	140_Hordeum_bulbosum
141	Hordeum pubiflorum	141_Hordeum_pubiflorum
142	Hordeum vulgare	142_Hordeum_vulgare
143	Secale cereale	143_Secale_cereale
144	Aegilops tauschii	144_Aegilops_tauschii
145	Triticum aestivum	145_Triticum_aestivum
146	Triticum dicoccoides	146_Triticum_dicoccoides
147	Triticum urartu	147_Triticum_urartu
148	Eleusine coracana	148_Eleusine_coracana
149	Eleusine indica	149_Eleusine_indica
150	Oropetium thomaeum	150_Oropetium_thomaeum
151	Eragrostis curvula	151_Eragrostis_curvula
152	Eragrostis tef	152_Eragrostis_tef
153	Sporobolus alterniflorus	153_Sporobolus_alterniflorus
154	Zoysia japonica	154_Zoysia_japonica
155	Zoysia matrella	155_Zoysia_matrella
156	Zoysia pacifica	156_Zoysia_pacifica
157	Coix aquatica	157_Coix_aquatica
158	Miscanthus sacchariflorus	158_Miscanthus_sacchariflorus
159	Saccharum hybrid cultivar	159_Saccharum_hybrid_cultivar
160	Saccharum spontaneum	160_Saccharum_spontaneum
161	Sorghum bicolor	161_Sorghum_bicolor
162	Zea mays	162_Zea_mays
163	Alloteropsis semialata	163_Alloteropsis_semialata
164	Echinochloa crus-galli	164_Echinochloa_crus-galli
165	Cenchrus americanus	165_Cenchrus_americanus
166	Setaria italica	166_Setaria_italica
167	Setaria viridis	167_Setaria_viridis
168	Dichanthelium oligosanthes	168_Dichanthelium_oligosanthes
169	Urochloa ruziziensis	169_Urochloa_ruziziensis
170	Panicum miliaceum	170_Panicum_miliaceum
171	Panicum hallii	171_Panicum_hallii
172	Eichhornia paniculata	172_Eichhornia_paniculata
173	Ensete ventricosum	173_Ensete_ventricosum
174	Musa acuminata	174_Musa_acuminata
175	Musa balbisiana	175_Musa_balbisiana
176	Musa itinerans	176_Musa_itinerans
177	Musa schizocarpa	177_Musa_schizocarpa
178	Berberis thunbergii	178_Berberis_thunbergii
179	Eschscholzia californica	179_Eschscholzia_californica
180	Macleaya cordata	180_Macleaya_cordata
181	Papaver somniferum	181_Papaver_somniferum
182	Aquilegia coerulea	182_Aquilegia_coerulea
183	Nelumbo nucifera	183_Nelumbo_nucifera
184	Macadamia integrifolia	184_Macadamia_integrifolia
185	Kalanchoe fedtschenkoi	185_Kalanchoe_fedtschenkoi
186	Sedum album	186_Sedum_album
187	Rhodoleia championii	187_Rhodoleia_championii
188	Cissus quadrangularis	188_Cissus_quadrangularis
189	Vitis aestivalis	189_Vitis_aestivalis
190	Vitis cinerea x Vitis riparia	190_Vitis_cinerea_x_Vitis_riparia
191	Vitis riparia	191_Vitis_riparia
192	Vitis riparia x Vitis cinerea	192_Vitis_riparia_x_Vitis_cinerea
193	Vitis vinifera	193_Vitis_vinifera
194	Vitis x labruscana x Vitis vinifera	194_Vitis_x_labruscana_x_Vitis_vinifera
195	Aristotelia chilensis	195_Aristotelia_chilensis
196	Cephalotus follicularis	196_Cephalotus_follicularis
197	Populus simonii	197_Populus_simonii
198	Salix brachista	198_Salix_brachista
199	Caryocar brasiliense	199_Caryocar_brasiliense
200	Ricinus communis	200_Ricinus_communis
201	Jatropha curcas	201_Jatropha_curcas
202	Manihot esculenta	202_Manihot_esculenta
203	Hevea brasiliensis	203_Hevea_brasiliensis
204	Euphorbia esula	204_Euphorbia_esula
205	Linum usitatissimum	205_Linum_usitatissimum
206	Passiflora edulis	206_Passiflora_edulis
207	Rhizophora apiculata	207_Rhizophora_apiculata
208	Populus alba	208_Populus_alba
209	Populus euphratica	209_Populus_euphratica
210	Populus trichocarpa	210_Populus_trichocarpa
211	Viola pubescens	211_Viola_pubescens
212	Glycine tomentella	212_Glycine_tomentella
213	Carpinus fangiana	213_Carpinus_fangiana
214	Chamaecrista fasciculata	214_Chamaecrista_fasciculata
215	Vachellia collinsii	215_Vachellia_collinsii
216	Mimosa pudica	216_Mimosa_pudica
217	Prosopis alba	217_Prosopis_alba
218	Cercis canadensis	218_Cercis_canadensis
219	Nissolia schottii	219_Nissolia_schottii
220	Arachis duranensis	220_Arachis_duranensis
221	Arachis hypogaea	221_Arachis_hypogaea
222	Arachis ipaensis	222_Arachis_ipaensis
223	Arachis monticola	223_Arachis_monticola
224	Lupinus angustifolius	224_Lupinus_angustifolius
225	Cicer arietinum	225_Cicer_arietinum
226	Cicer echinospermum	226_Cicer_echinospermum
227	Cicer reticulatum	227_Cicer_reticulatum
228	Pisum sativum	228_Pisum_sativum
229	Vicia faba	229_Vicia_faba
230	Medicago truncatula	230_Medicago_truncatula
231	Trifolium medium	231_Trifolium_medium
232	Trifolium pratense	232_Trifolium_pratense
233	Trifolium subterraneum	233_Trifolium_subterraneum
234	Lotus japonicus	234_Lotus_japonicus
235	Abrus precatorius	235_Abrus_precatorius
236	Cajanus cajan	236_Cajanus_cajan
237	Glycine max	237_Glycine_max
238	Glycine soja	238_Glycine_soja
239	Mucuna pruriens	239_Mucuna_pruriens
240	Phaseolus coccineus	240_Phaseolus_coccineus
241	Phaseolus vulgaris	241_Phaseolus_vulgaris
242	Spatholobus suberectus	242_Spatholobus_suberectus
243	Vigna angularis	243_Vigna_angularis
244	Vigna radiata	244_Vigna_radiata
245	Vigna unguiculata	245_Vigna_unguiculata
246	Quillaja saponaria	246_Quillaja_saponaria
247	Cannabis sativa	247_Cannabis_sativa
248	Humulus lupulus	248_Humulus_lupulus
249	Parasponia andersonii	249_Parasponia_andersonii
250	Trema orientale	250_Trema_orientale
251	Artocarpus camansi	251_Artocarpus_camansi
252	Ficus carica	252_Ficus_carica
253	Ficus erecta	253_Ficus_erecta
254	Morus notabilis	254_Morus_notabilis
255	Ochetophila trinervis	255_Ochetophila_trinervis
256	Rhamnella rubrinervis	256_Rhamnella_rubrinervis
257	Ziziphus jujuba	257_Ziziphus_jujuba
258	Prunus avium	258_Prunus_avium
259	Prunus dulcis	259_Prunus_dulcis
260	Prunus mume	260_Prunus_mume
261	Prunus persica	261_Prunus_persica
262	Prunus yedoensis	262_Prunus_yedoensis
263	Malus baccata	263_Malus_baccata
264	Malus domestica	264_Malus_domestica
265	Pyrus betulifolia	265_Pyrus_betulifolia
266	Pyrus x bretschneideri	266_Pyrus_x_bretschneideri
267	Pyrus ussuriensis x Pyrus communis	267_Pyrus_ussuriensis_x_Pyrus_communis
268	Dryas drummondii	268_Dryas_drummondii
269	Purshia tridentata	269_Purshia_tridentata
270	Geum urbanum	270_Geum_urbanum
271	Fragaria iinumae	271_Fragaria_iinumae
272	Fragaria nipponica	272_Fragaria_nipponica
273	Fragaria nubicola	273_Fragaria_nubicola
274	Fragaria orientalis	274_Fragaria_orientalis
275	Fragaria vesca	275_Fragaria_vesca
276	Fragaria x ananassa	276_Fragaria_x_ananassa
277	Rosa chinensis	277_Rosa_chinensis
278	Rosa lucieae	278_Rosa_lucieae
279	Rosa multiflora	279_Rosa_multiflora
280	Rosa x damascena	280_Rosa_x_damascena
281	Boehmeria nivea	281_Boehmeria_nivea
282	Begonia fuchsioides	282_Begonia_fuchsioides
283	Benincasa hispida	283_Benincasa_hispida
284	Citrullus lanatus	284_Citrullus_lanatus
285	Cucumis melo	285_Cucumis_melo
286	Cucumis sativus	286_Cucumis_sativus
287	Lagenaria siceraria	287_Lagenaria_siceraria
288	Cucurbita argyrosperma	288_Cucurbita_argyrosperma
289	Cucurbita maxima	289_Cucurbita_maxima
290	Cucurbita moschata	290_Cucurbita_moschata
291	Cucurbita pepo	291_Cucurbita_pepo
292	Momordica charantia	292_Momordica_charantia
293	Datisca glomerata	293_Datisca_glomerata
294	Alnus glutinosa	294_Alnus_glutinosa
295	Betula nana	295_Betula_nana
296	Betula pendula	296_Betula_pendula
297	Casuarina equisetifolia	297_Casuarina_equisetifolia
298	Casuarina glauca	298_Casuarina_glauca
299	Castanea mollissima	299_Castanea_mollissima
300	Fagus sylvatica	300_Fagus_sylvatica
301	Quercus lobata	301_Quercus_lobata
302	Quercus robur	302_Quercus_robur
303	Quercus suber	303_Quercus_suber
304	Juglans cathayensis	304_Juglans_cathayensis
305	Juglans hindsii	305_Juglans_hindsii
306	Juglans mandshurica	306_Juglans_mandshurica
307	Juglans microcarpa	307_Juglans_microcarpa
308	Juglans microcarpa x Juglans regia	308_Juglans_microcarpa_x_Juglans_regia
309	Juglans nigra	309_Juglans_nigra
310	Juglans regia	310_Juglans_regia
311	Juglans sigillata	311_Juglans_sigillata
312	Pterocarya stenoptera	312_Pterocarya_stenoptera
313	Morella rubra	313_Morella_rubra
314	Punica granatum	314_Punica_granatum
315	Eucalyptus camaldulensis	315_Eucalyptus_camaldulensis
316	Eucalyptus grandis	316_Eucalyptus_grandis
317	Eucalyptus melliodora	317_Eucalyptus_melliodora
318	Eucalyptus pauciflora	318_Eucalyptus_pauciflora
319	Gossypium darwinii	319_Gossypium_darwinii
320	Gossypium mustelinum	320_Gossypium_mustelinum
321	Gossypium tomentosum	321_Gossypium_tomentosum
322	Gossypium turneri	322_Gossypium_turneri
323	Metrosideros polymorpha	323_Metrosideros_polymorpha
324	Rhodamnia argentea	324_Rhodamnia_argentea
325	Eugenia uniflora	325_Eugenia_uniflora
326	Psidium guajava	326_Psidium_guajava
327	Syzygium oleosum	327_Syzygium_oleosum
328	Pistacia vera	328_Pistacia_vera
329	Azadirachta indica	329_Azadirachta_indica
330	Atalantia buxifolia	330_Atalantia_buxifolia
331	Citrus cavaleriei	331_Citrus_cavaleriei
332	Citrus clementina	332_Citrus_clementina
333	Citrus hindsii	333_Citrus_hindsii
334	Citrus maxima	334_Citrus_maxima
335	Citrus medica	335_Citrus_medica
336	Citrus reticulata	336_Citrus_reticulata
337	Citrus sinensis	337_Citrus_sinensis
338	Citrus unshiu	338_Citrus_unshiu
339	Citrus x paradisi x Citrus trifoliata	339_Citrus_x_paradisi_x_Citrus_trifoliata
340	Acer yangbiense	340_Acer_yangbiense
341	Xanthoceras sorbifolium	341_Xanthoceras_sorbifolium
342	Herrania umbratica	342_Herrania_umbratica
343	Theobroma cacao	343_Theobroma_cacao
344	Corchorus capsularis	344_Corchorus_capsularis
345	Corchorus olitorius	345_Corchorus_olitorius
346	Durio zibethinus	346_Durio_zibethinus
347	Gossypioides kirkii	347_Gossypioides_kirkii
348	Gossypium arboreum	348_Gossypium_arboreum
349	Gossypium barbadense	349_Gossypium_barbadense
350	Gossypium hirsutum	350_Gossypium_hirsutum
351	Gossypium raimondii	351_Gossypium_raimondii
352	Gossypium thurberi	352_Gossypium_thurberi
353	Hibiscus syriacus	353_Hibiscus_syriacus
354	Kokia drynarioides	354_Kokia_drynarioides
355	Aquilaria agallochum	355_Aquilaria_agallochum
356	Aquilaria sinensis	356_Aquilaria_sinensis
357	Aethionema arabicum	357_Aethionema_arabicum
358	Arabis alpina	358_Arabis_alpina
359	Arabis montbretiana	359_Arabis_montbretiana
360	Arabis nordmanniana	360_Arabis_nordmanniana
361	Aurinia saxatilis	361_Aurinia_saxatilis
362	Odontarrhena argentea	362_Odontarrhena_argentea
363	Anastatica hierochuntica	363_Anastatica_hierochuntica
364	Biscutella auriculata	364_Biscutella_auriculata
365	Biscutella laevigata	365_Biscutella_laevigata
366	Boechera puberula	366_Boechera_puberula
367	Boechera stricta	367_Boechera_stricta
368	Schrenkiella parvula	368_Schrenkiella_parvula
369	Brassica cretica	369_Brassica_cretica
370	Brassica juncea	370_Brassica_juncea
371	Brassica napus	371_Brassica_napus
372	Brassica nigra	372_Brassica_nigra
373	Brassica oleracea	373_Brassica_oleracea
374	Brassica rapa	374_Brassica_rapa
375	Erucastrum elatum	375_Erucastrum_elatum
376	Raphanus raphanistrum	376_Raphanus_raphanistrum
377	Raphanus sativus	377_Raphanus_sativus
378	Arabidopsis halleri	378_Arabidopsis_halleri
379	Arabidopsis lyrata	379_Arabidopsis_lyrata
380	Arabidopsis thaliana	380_Arabidopsis_thaliana
381	Camelina sativa	381_Camelina_sativa
382	Capsella bursa-pastoris	382_Capsella_bursa-pastoris
383	Capsella rubella	383_Capsella_rubella
384	Barbarea vulgaris	384_Barbarea_vulgaris
385	Leavenworthia alabamica	385_Leavenworthia_alabamica
386	Nasturtium officinale	386_Nasturtium_officinale
387	Noccaea caerulescens	387_Noccaea_caerulescens
388	Noccaea goesingensis	388_Noccaea_goesingensis
389	Raparia bulbosa	389_Raparia_bulbosa
390	Conringia planisiliqua	390_Conringia_planisiliqua
391	Cochlearia officinalis	391_Cochlearia_officinalis
392	Crucihimalaya himalaica	392_Crucihimalaya_himalaica
393	Erysimum cheiri	393_Erysimum_cheiri
394	Erysimum pusillum	394_Erysimum_pusillum
395	Euclidium syriacum	395_Euclidium_syriacum
396	Eutrema heterophyllum	396_Eutrema_heterophyllum
397	Eutrema salsugineum	397_Eutrema_salsugineum
398	Eutrema yunnanense	398_Eutrema_yunnanense
399	Heliophila coronopifolia	399_Heliophila_coronopifolia
400	Iberis amara	400_Iberis_amara
401	Iberis pinnata	401_Iberis_pinnata
402	Isatis lusitanica	402_Isatis_lusitanica
403	Isatis tinctoria	403_Isatis_tinctoria
404	Kernera saxatilis	404_Kernera_saxatilis
405	Lepidium africanum	405_Lepidium_africanum
406	Lepidium aucheri	406_Lepidium_aucheri
407	Physaria acutifolia	407_Physaria_acutifolia
408	Physaria fendleri	408_Physaria_fendleri
409	Physaria ovalifolia	409_Physaria_ovalifolia
410	Sisymbrium altissimum	410_Sisymbrium_altissimum
411	Sisymbrium irio	411_Sisymbrium_irio
412	Macropodium nivale	412_Macropodium_nivale
413	Pseudoturritis turrita	413_Pseudoturritis_turrita
414	Turritis glabra	414_Turritis_glabra
415	Thlaspi arvense	415_Thlaspi_arvense
416	Carica papaya	416_Carica_papaya
417	Tarenaya hassleriana	417_Tarenaya_hassleriana
418	Santalum album	418_Santalum_album
419	Amaranthus hypochondriacus	419_Amaranthus_hypochondriacus
420	Amaranthus tuberculatus	420_Amaranthus_tuberculatus
421	Carnegiea gigantea	421_Carnegiea_gigantea
422	Lophocereus schottii	422_Lophocereus_schottii
423	Pachycereus pringlei	423_Pachycereus_pringlei
424	Stenocereus thurberi	424_Stenocereus_thurberi
425	Pereskia humboldtii	425_Pereskia_humboldtii
426	Dianthus caryophyllus	426_Dianthus_caryophyllus
427	Silene latifolia	427_Silene_latifolia
428	Beta vulgaris	428_Beta_vulgaris
429	Beta patula	429_Beta_patula
430	Bassia scoparia	430_Bassia_scoparia
431	Spinacia oleracea	431_Spinacia_oleracea
432	Chenopodium pallidicaule	432_Chenopodium_pallidicaule
433	Chenopodium quinoa	433_Chenopodium_quinoa
434	Chenopodium suecicum	434_Chenopodium_suecicum
435	Drosera capensis	435_Drosera_capensis
436	Fagopyrum esculentum	436_Fagopyrum_esculentum
437	Fagopyrum tataricum	437_Fagopyrum_tataricum
438	Nyssa sinensis	438_Nyssa_sinensis
439	Actinidia chinensis	439_Actinidia_chinensis
440	Actinidia eriantha	440_Actinidia_eriantha
441	Diospyros lotus	441_Diospyros_lotus
442	Monotropa hypopitys	442_Monotropa_hypopitys
443	Vaccinium macrocarpon	443_Vaccinium_macrocarpon
444	Embelia ribes	444_Embelia_ribes
445	Primula veris	445_Primula_veris
446	Primula vulgaris	446_Primula_vulgaris
447	Argania spinosa	447_Argania_spinosa
448	Camellia sinensis	448_Camellia_sinensis
449	Nothapodytes nimmoniana	449_Nothapodytes_nimmoniana
450	Andrographis paniculata	450_Andrographis_paniculata
451	Ruellia speciosa	451_Ruellia_speciosa
452	Handroanthus impetiginosus	452_Handroanthus_impetiginosus
453	Dorcoceras hygrometricum	453_Dorcoceras_hygrometricum
454	Pogostemon cablin	454_Pogostemon_cablin
455	Scutellaria baicalensis	455_Scutellaria_baicalensis
456	Perilla citriodora	456_Perilla_citriodora
457	Mentha longifolia	457_Mentha_longifolia
458	Salvia splendens	458_Salvia_splendens
459	Ocimum tenuiflorum	459_Ocimum_tenuiflorum
460	Genlisea aurea	460_Genlisea_aurea
461	Utricularia gibba	461_Utricularia_gibba
462	Utricularia reniformis	462_Utricularia_reniformis
463	Lindernia brevidens	463_Lindernia_brevidens
464	Fraxinus excelsior	464_Fraxinus_excelsior
465	Olea europaea	465_Olea_europaea
466	Striga asiatica	466_Striga_asiatica
467	Sesamum indicum	467_Sesamum_indicum
468	Erythranthe guttata	468_Erythranthe_guttata
469	Penstemon barbatus	469_Penstemon_barbatus
470	Penstemon centranthifolius	470_Penstemon_centranthifolius
471	Penstemon grinnellii	471_Penstemon_grinnellii
472	Cuscuta australis	472_Cuscuta_australis
473	Cuscuta campestris	473_Cuscuta_campestris
474	Ipomoea batatas	474_Ipomoea_batatas
475	Ipomoea nil	475_Ipomoea_nil
476	Ipomoea trifida	476_Ipomoea_trifida
477	Ipomoea triloba	477_Ipomoea_triloba
478	Nicotiana attenuata	478_Nicotiana_attenuata
479	Nicotiana glauca	479_Nicotiana_glauca
480	Nicotiana knightiana	480_Nicotiana_knightiana
481	Nicotiana obtusifolia	481_Nicotiana_obtusifolia
482	Nicotiana otophora	482_Nicotiana_otophora
483	Nicotiana paniculata	483_Nicotiana_paniculata
484	Nicotiana rustica	484_Nicotiana_rustica
485	Nicotiana sylvestris	485_Nicotiana_sylvestris
486	Nicotiana tabacum	486_Nicotiana_tabacum
487	Nicotiana tomentosiformis	487_Nicotiana_tomentosiformis
488	Nicotiana undulata	488_Nicotiana_undulata
489	Capsicum annuum	489_Capsicum_annuum
490	Capsicum baccatum	490_Capsicum_baccatum
491	Capsicum chinense	491_Capsicum_chinense
492	Jaltomata sinuosa	492_Jaltomata_sinuosa
493	Solanum arcanum	493_Solanum_arcanum
494	Solanum chilense	494_Solanum_chilense
495	Solanum habrochaites	495_Solanum_habrochaites
496	Solanum lycopersicum	496_Solanum_lycopersicum
497	Solanum pennellii	497_Solanum_pennellii
498	Solanum pimpinellifolium	498_Solanum_pimpinellifolium
499	Solanum commersonii	499_Solanum_commersonii
500	Solanum melongena	500_Solanum_melongena
501	Solanum tuberosum	501_Solanum_tuberosum
502	Solanum verrucosum	502_Solanum_verrucosum
503	Asclepias syriaca	503_Asclepias_syriaca
504	Calotropis procera	504_Calotropis_procera
505	Rhazya stricta	505_Rhazya_stricta
506	Catharanthus roseus	506_Catharanthus_roseus
507	Coffea arabica	507_Coffea_arabica
508	Coffea canephora	508_Coffea_canephora
509	Coffea eugenioides	509_Coffea_eugenioides
510	Echium plantagineum	510_Echium_plantagineum
511	Mikania micrantha	511_Mikania_micrantha
512	Artemisia annua	512_Artemisia_annua
513	Chrysanthemum seticuspe	513_Chrysanthemum_seticuspe
514	Erigeron canadensis	514_Erigeron_canadensis
515	Helianthus annuus	515_Helianthus_annuus
516	Silphium perfoliatum	516_Silphium_perfoliatum
517	Cynara cardunculus var. scolymus	517_Cynara_cardunculus_var._scolymus
518	Silybum marianum	518_Silybum_marianum
519	Carthamus tinctorius	519_Carthamus_tinctorius
520	Lactuca sativa	520_Lactuca_sativa
521	Codonopsis pilosula	521_Codonopsis_pilosula
522	Platycodon grandiflorus	522_Platycodon_grandiflorus
523	Foeniculum vulgare	523_Foeniculum_vulgare
524	Daucus carota	524_Daucus_carota
525	Oenanthe javanica	525_Oenanthe_javanica

## Sheet: 1a Data source3 (2)
NO	Species name	Genome download website	BioSample	BioProject	Assembly Identifier	Assembly Level	Genome size(Mb)	GC%	Replicons	WGS	Scaffolds number	Release Date	Gene down website
3	Chloropicon primus	ftp://ftp.ncbi.nlm.nih.gov/genomes/all/GCA/007/859/695/GCA_007859695.1_ASM785969v1	SAMN04584780	PRJNA316521	GCA_007859695.1	Complete	17.4007	57.511	chromosome 1:CP031034.1; chromosome 2:CP031035.1; chromosome 3:CP031036.1; chromosome 4:CP031037.1; chromosome 5:CP031038.1; chromosome 6:CP031039.1; chromosome 7:CP031040.1; chromosome 8:CP031041.1; chromosome 9:CP031042.1; chromosome 10:CP031043.1; chromosome 11:CP031044.1; chromosome 12:CP031045.1; chromosome 13:CP031046.1; chromosome 14:CP031047.1; chromosome 15:CP031048.1; chromosome 16:CP03…		20	2019-08-07T00:00:00Z	ftp://ftp.ncbi.nlm.nih.gov/genomes/all/GCA/007/859/695/GCA_007859695.1_ASM785969v1
4	Edaphochlamys debaryana	ftp://ftp.ncbi.nlm.nih.gov/genomes/all/GCA/001/662/405/GCA_001662405.1_Cde_assembly01	SAMD00049915	PRJDB4711	GCA_001662405.1	Scaffold	120.364	62.3		BDDB01	10139	2016-04-22T00:00:00Z	ftp://ftp.ncbi.nlm.nih.gov/genomes/all/GCA/001/662/405/GCA_001662405.1_Cde_assembly01
5	Bathycoccus prasinos	ftp://ftp.ncbi.nlm.nih.gov/genomes/all/GCF/002/220/235/GCF_002220235.1_ASM222023v1		PRJEA71363	GCA_002220235.1	Chromosome	15.0743	48.024	chromosome 1:NC_024008.1/FO082278.1; chromosome 2:NC_024007.1/FO082277.1; chromosome 3:NC_024006.1/FO082276.1; chromosome 4:NC_024005.1/FO082275.1; chromosome 5:NC_024004.1/FO082274.1; chromosome 6:NC_024003.1/FO082273.1; chromosome 7:NC_024002.1/FO082272.1; chromosome 8:NC_024001.1/FO082271.1; chromosome 9:NC_024000.1/FO082270.1; chromosome 10:NC_023999.1/FO082269.1; chromosome 11:NC_023998.1/FO…		21	2012-06-21T00:00:00Z	ftp://ftp.ncbi.nlm.nih.gov/genomes/all/GCF/002/220/235/GCF_002220235.1_ASM222023v1
6	Ostreococcus tauri	ftp://ftp.ncbi.nlm.nih.gov/genomes/all/GCF/000/214/015/GCF_000214015.3_version_140606	SAMEA3138397	PRJNA12912	GCA_000214015.2	Chromosome	13.0328	59.1984	chromosome 1:NC_014426.2/CAID01000001.2; chromosome 2:NC_014427.2/CAID01000002.2; chromosome 3:NC_014428.2/CAID01000003.2; chromosome 4:NC_014429.2/CAID01000004.2; chromosome 5:NC_014430.2/CAID01000005.2; chromosome 6:NC_014431.2/CAID01000006.2; chromosome 7:NC_014432.2/CAID01000007.2; chromosome 8:NC_014433.2/CAID01000008.2; chromosome 9:NC_014434.2/CAID01000009.2; chromosome 10:NC_014435.2/CAID…	CAID01	22	2010-10-15T00:00:00Z	ftp://ftp.ncbi.nlm.nih.gov/genomes/all/GCA/000/214/015/GCA_000214015.2_version_140606
7	Ostreococcus sp. 'lucimarinus'	ftp://ftp.ncbi.nlm.nih.gov/genomes/all/GCF/000/092/065/GCF_000092065.1_ASM9206v1	SAMN03081420	PRJNA13044	GCA_000092065.1	Complete	13.2049	60.4431	chromosome 1:NC_009355.1/CP000581.1; chromosome 2:NC_009356.1/CP000582.1; chromosome 3:NC_009357.1/CP000583.1; chromosome 4:NC_009358.1/CP000584.1; chromosome 5:NC_009359.1/CP000585.1; chromosome 6:NC_009360.1/CP000586.1; chromosome 7:NC_009361.1/CP000587.1; chromosome 8:NC_009362.1/CP000588.1; chromosome 9:NC_009363.1/CP000589.1; chromosome 10:NC_009364.1/CP000590.1; chromosome 11:NC_009365.1/CP…		21	2007-04-10T00:00:00Z
8	Micromonas	ftp://ftp.ncbi.nlm.nih.gov/genomes/all/GCA/001/430/725/GCA_001430725.1_ASM143072v1	SAMN03380213	PRJNA276743	GCA_001430725.1	Scaffold	19.5824	59.2		LAQG01	1069	2015-04-28T00:00:00Z
9	Micromonas commoda	ftp://ftp.ncbi.nlm.nih.gov/genomes/all/GCF/000/090/985/GCF_000090985.2_ASM9098v2	SAMN03081421	PRJNA15676	GCA_000090985.2	Complete	21.1093	63.8223	chromosome 1:NC_013038.1/CP001574.1; chromosome 2:NC_013039.1/CP001323.1; chromosome 3:NC_013040.1/CP001324.1; chromosome 4:NC_013041.1/CP001325.1; chromosome 5:NC_013042.1/CP001326.1; chromosome 6:NC_013043.1/CP001327.1; chromosome 7:NC_013044.1/CP001328.1; chromosome 8:NC_013045.1/CP001575.1; chromosome 9:NC_013046.1/CP001329.1; chromosome 10:NC_013047.1/CP001576.1; chromosome 11:NC_013048.1/CP…		19	2009-04-10T00:00:00Z	ftp://ftp.ncbi.nlm.nih.gov/genomes/all/GCA/000/090/985/GCA_000090985.2_ASM9098v2
10	Micromonas pusilla	ftp://ftp.ncbi.nlm.nih.gov/genomes/all/GCF/000/151/265/GCF_000151265.2_Micromonas_pusilla_CCMP1545_v2.0	SAMN02953743	PRJNA15678	GCA_000151265.1	Scaffold	21.9583	65.7		ACCP01	21	2009-04-07T00:00:00Z	ftp://ftp.ncbi.nlm.nih.gov/genomes/all/GCF/000/151/265/GCF_000151265.2_Micromonas_pusilla_CCMP1545_v2.0
11	Bathycoccus	ftp://ftp.ncbi.nlm.nih.gov/genomes/all/GCA/900/128/745/GCA_900128745.1_TOSAG39-1	SAMEA3727691	PRJEB6603	GCA_900128745.1	Scaffold	10.0579	47.3		FQSR01	2118	2016-11-26T00:00:00Z
12	unclassified Mamiellophyceae	ftp://ftp.ncbi.nlm.nih.gov/genomes/all/GCA/004/115/355/GCA_004115355.1_Halite_2017MT	SAMN10615470	PRJNA510804	GCA_004115355.1	Scaffold	10.2834	55.2		RZXY01	2200	2019-01-28T00:00:00Z
13	Cymbomonas tetramitiformis	ftp://ftp.ncbi.nlm.nih.gov/genomes/all/GCA/001/247/695/GCA_001247695.1_ASM124769v1	SAMN03799721	PRJNA286761	GCA_001247695.1	Scaffold	281.27	48.9		LGRX01	40243	2015-08-05T00:00:00Z	ftp://ftp.ncbi.nlm.nih.gov/genomes/all/GCA/001/247/695/GCA_001247695.1_ASM124769v1
14	Chlamydomonas	ftp://ftp.ncbi.nlm.nih.gov/genomes/all/GCA/004/335/715/GCA_004335715.1_ASM433571v1	SAMN08335857	PRJNA428298	GCA_004335715.1	Scaffold	114.12	66.9		QAXL01	9862	2019-03-08T00:00:00Z
15	Chlamydomonas applanata	ftp://ftp.ncbi.nlm.nih.gov/genomes/all/GCA/001/662/365/GCA_001662365.1_Cap_assembly01	SAMD00049913	PRJDB4711	GCA_001662365.1	Scaffold	78.5042	56.3		BDCZ01	2533	2016-04-22T00:00:00Z	ftp://ftp.ncbi.nlm.nih.gov/genomes/all/GCA/001/662/365/GCA_001662365.1_Cap_assembly01
16	Chlamydomonas asymmetrica	ftp://ftp.ncbi.nlm.nih.gov/genomes/all/GCA/001/662/385/GCA_001662385.1_Cas_assembly01	SAMD00049914	PRJDB4711	GCA_001662385.1	Scaffold	141.916	55.1		BDDA01	4102	2016-04-22T00:00:00Z	ftp://ftp.ncbi.nlm.nih.gov/genomes/all/GCA/001/662/385/GCA_001662385.1_Cas_assembly01
17	Chlamydomonas debaryana	ftp://ftp.ncbi.nlm.nih.gov/genomes/all/GCA/001/662/405/GCA_001662405.1_Cde_assembly01	SAMD00049915	PRJDB4711	GCA_001662405.1	Scaffold	120.364	62.3		BDDB01	10139	2016-04-22T00:00:00Z	ftp://ftp.ncbi.nlm.nih.gov/genomes/all/GCA/001/662/405/GCA_001662405.1_Cde_assembly01
18	Chlamydomonas eustigma	ftp://ftp.ncbi.nlm.nih.gov/genomes/all/GCA/002/335/675/GCA_002335675.1_C.eustigma_genome_v1.0	SAMD00071608	PRJDB5468	GCA_002335675.1	Scaffold	66.6295	43.7		BEGY01	520	2017-08-31T20:51:00Z	ftp://ftp.ncbi.nlm.nih.gov/genomes/all/GCA/002/335/675/GCA_002335675.1_C.eustigma_genome_v1.0
19	Chlamydomonas reinhardtii	ftp://ftp.ncbi.nlm.nih.gov/genomes/all/GCF/000/002/595/GCF_000002595.1_v3.0	SAMN02953692	PRJNA12260	GCA_000002595.2	Scaffold	120.405	61.9512	mitochondrion MT:NC_001638.1/; chloroplast Pltd:NC_005353.1/	ABCN01	1558	2007-08-03T00:00:00Z	ftp://ftp.ncbi.nlm.nih.gov/genomes/all/GCA/000/002/595/GCA_000002595.2_v3.0
20	Chlamydomonas sphaeroides	ftp://ftp.ncbi.nlm.nih.gov/genomes/all/GCA/001/662/425/GCA_001662425.1_Csp_assembly01	SAMD00049916	PRJDB4711	GCA_001662425.1	Scaffold	122.189	65.9		BDDC01	6890	2016-04-22T00:00:00Z	ftp://ftp.ncbi.nlm.nih.gov/genomes/all/GCA/001/662/425/GCA_001662425.1_Csp_assembly01
21	Chloromonas	ftp://ftp.ncbi.nlm.nih.gov/genomes/all/GCA/004/335/635/GCA_004335635.1_ASM433563v1	SAMN08335861	PRJNA428298	GCA_004335635.1	Scaffold	102.366	52.6		QAXH01	6822	2019-03-08T00:00:00Z
22	Eudorina	ftp://ftp.ncbi.nlm.nih.gov/genomes/all/GCA/003/117/195/GCA_003117195.1_EudorinaFemale_1.0	SAMD00022973	PRJDB3310	GCA_003117195.1	Scaffold	184.032	61		BDSI01	3180	2018-04-06T21:43:00Z
23	Gonium pectorale	ftp://ftp.ncbi.nlm.nih.gov/genomes/all/GCA/001/584/585/GCA_001584585.1_ASM158458v1	SAMN04493491	PRJNA302163	GCA_001584585.1	Scaffold	148.806	51		LSYV01	2373	2016-03-09T00:00:00Z	ftp://ftp.ncbi.nlm.nih.gov/genomes/all/GCA/001/584/585/GCA_001584585.1_ASM158458v1
24	Volvox carteri	ftp://ftp.ncbi.nlm.nih.gov/genomes/all/GCF/000/143/455/GCF_000143455.1_v1.0	SAMN02953753	PRJNA13109	GCA_000143455.1	Scaffold	137.684	55.3		ACJH01	1251	2010-07-06T00:00:00Z	ftp://ftp.ncbi.nlm.nih.gov/genomes/all/GCF/000/143/455/GCF_000143455.1_v1.0
25	Yamagishiella unicocca	ftp://ftp.ncbi.nlm.nih.gov/genomes/all/GCA/003/116/995/GCA_003116995.1_YamagishiellaPlus_1.0	SAMD00056693	PRJDB5042	GCA_003116995.1	Contig	134.235	61		BDSL01	1461	2018-04-06T20:58:00Z	ftp://ftp.ncbi.nlm.nih.gov/genomes/all/GCA/003/116/995/GCA_003116995.1_YamagishiellaPlus_1.0
26	Haematococcus	ftp://ftp.ncbi.nlm.nih.gov/genomes/all/GCA/004/335/575/GCA_004335575.1_ASM433557v1	SAMN08335866	PRJNA428298	GCA_004335575.1	Scaffold	77.83	54.8		QAXD01	303	2019-03-08T00:00:00Z
27	Haematococcus lacustris	ftp://ftp.ncbi.nlm.nih.gov/genomes/all/GCA/003/970/955/GCA_003970955.1_ASM397095v1	SAMN09912191	PRJNA487914	GCA_003970955.1	Contig	365.774	59.3		QXTD01	104856	2018-12-17T00:00:00Z	ftp://ftp.ncbi.nlm.nih.gov/genomes/all/GCA/003/970/955/GCA_003970955.1_ASM397095v1
29	Characiochloris	ftp://ftp.ncbi.nlm.nih.gov/genomes/all/GCA/004/335/845/GCA_004335845.1_ASM433584v1	SAMN08335852	PRJNA428298	GCA_004335845.1	Scaffold	95.4771	53.3		QAXP01	6685	2019-03-08T00:00:00Z	ftp://ftp.ncbi.nlm.nih.gov/genomes/all/GCA/004/335/845/GCA_004335845.1_ASM433584v1
30	Dunaliella	ftp://ftp.ncbi.nlm.nih.gov/genomes/all/GCA/004/335/885/GCA_004335885.1_ASM433588v1	SAMN08335862	PRJNA428298	GCA_004335885.1	Scaffold	25.5382	40.3		QFBH01	1189	2019-03-08T00:00:00Z
31	Dunaliella salina	ftp://ftp.ncbi.nlm.nih.gov/genomes/all/GCA/002/284/615/GCA_002284615.1_Dsal_v1.0	SAMN02746051	PRJNA32771	GCA_002284615.1	Scaffold	343.704	40.1		NSFN01	5512	2017-08-31T00:00:00Z	ftp://ftp.ncbi.nlm.nih.gov/genomes/all/GCA/002/284/615/GCA_002284615.1_Dsal_v1.0
32	Tetrabaena socialis	ftp://ftp.ncbi.nlm.nih.gov/genomes/all/GCA/002/891/735/GCA_002891735.1_TetSoc1	SAMN07332538	PRJNA393411	GCA_002891735.1	Scaffold	135.78	47.7		PGGS01	5856	2018-01-18T00:00:00Z	ftp://ftp.ncbi.nlm.nih.gov/genomes/all/GCA/002/891/735/GCA_002891735.1_TetSoc1
33	Mychonastes homosphaera	ftp://ftp.ncbi.nlm.nih.gov/genomes/all/GCA/009/193/075/GCA_009193075.1_ASM919307v1	SAMN12340813	PRJNA556117	GCA_009193075.1	Contig	24.2042	72.4		VXJC01	30	2019-10-21T00:00:00Z	ftp://ftp.ncbi.nlm.nih.gov/genomes/all/GCA/009/193/075/GCA_009193075.1_ASM919307v1
34	Messastrum gracile	ftp://ftp.ncbi.nlm.nih.gov/genomes/all/GCA/008/037/345/GCA_008037345.1_MG_SEMC4_Ver1.0	SAMN12111213	PRJNA550185	GCA_008037345.1	Scaffold	60.6629	70		VIYE01	32473	2019-08-20T00:00:00Z	ftp://ftp.ncbi.nlm.nih.gov/genomes/all/GCA/008/037/345/GCA_008037345.1_MG_SEMC4_Ver1.0
35	Monoraphidium	ftp://ftp.ncbi.nlm.nih.gov/genomes/all/GCA/002/814/315/GCA_002814315.1_ASM281431v1	SAMN07326317	PRJNA392383	GCA_002814315.1	Contig	74.6589	51.2		NMUB01	1851	2017-12-08T00:00:00Z
36	Monoraphidium neglectum	ftp://ftp.ncbi.nlm.nih.gov/genomes/all/GCF/000/611/645/GCF_000611645.1_mono_v1	SAMN02981574	PRJNA293989	GCA_000611645.1	Scaffold	69.7118	64.1131	mitochondrion MT:NW_014013625.1/CM002677.1; chloroplast CP:NW_014013626.1/CM002678.1	AYTC01	6720	2014-03-28T00:00:00Z	ftp://ftp.ncbi.nlm.nih.gov/genomes/all/GCA/000/611/645/GCA_000611645.1_mono_v1
37	Raphidocelis subcapitata	ftp://ftp.ncbi.nlm.nih.gov/genomes/all/GCA/003/203/535/GCA_003203535.1_Rsub_1.0	SAMD00078043	PRJDB5653	GCA_003203535.1	Scaffold	51.1627	70		BDRX01	300	2018-05-30T00:00:00Z	ftp://ftp.ncbi.nlm.nih.gov/genomes/all/GCA/003/203/535/GCA_003203535.1_Rsub_1.0
38	Desmodesmus armatus	ftp://ftp.ncbi.nlm.nih.gov/genomes/all/GCA/007/449/985/GCA_007449985.1_DaSE107_hybrid_PB-I	SAMN11569667	PRJNA540980	GCA_007449985.1	Contig	115.87	56.6		VIIQ01	528	2019-07-25T00:00:00Z	ftp://ftp.ncbi.nlm.nih.gov/genomes/all/GCA/007/449/985/GCA_007449985.1_DaSE107_hybrid_PB-I
39	Scenedesmus	ftp://ftp.ncbi.nlm.nih.gov/genomes/all/GCA/004/335/835/GCA_004335835.1_ASM433583v1	SAMN08335872	PRJNA428298	GCA_004335835.1	Scaffold	93.2383	56.8		RWJK01	1984	2019-03-08T00:00:00Z
40	Scenedesmus quadricauda	ftp://ftp.ncbi.nlm.nih.gov/genomes/all/GCA/002/317/545/GCA_002317545.1_ASM231754v1	SAMN07360942	PRJNA394817	GCA_002317545.1	Contig	65.3539	63.2		NNCB01	13425	2017-09-20T00:00:00Z	ftp://ftp.ncbi.nlm.nih.gov/genomes/all/GCA/002/317/545/GCA_002317545.1_ASM231754v1
41	Scenedesmus vacuolatus	ftp://ftp.ncbi.nlm.nih.gov/genomes/all/GCA/004/764/505/GCA_004764505.1_UFZ-Svac-1.0	SAMN10291121	PRJNA498405	GCA_004764505.1	Contig	23.3582	53.6		RHEI01	20139	2019-04-09T00:00:00Z	ftp://ftp.ncbi.nlm.nih.gov/genomes/all/GCA/004/764/505/GCA_004764505.1_UFZ-Svac-1.0
42	Coelastrella	ftp://ftp.ncbi.nlm.nih.gov/genomes/all/GCA/001/630/525/GCA_001630525.1_ASM163052v1	SAMN04497931	PRJNA306811	GCA_001630525.1	Contig	80.2218	51.8		LWCB01	16225	2016-04-25T00:00:00Z
43	Tetradesmus obliquus	ftp://ftp.ncbi.nlm.nih.gov/genomes/all/GCA/900/108/755/GCA_900108755.1_sob1	SAMEA4502842	PRJEB15865	GCA_900108755.1	Scaffold	107.716	56.8		FNXT01	1368	2016-11-02T00:00:00Z	ftp://ftp.ncbi.nlm.nih.gov/genomes/all/GCA/900/108/755/GCA_900108755.1_sob1
44	Tetraselmis striata	ftp://ftp.ncbi.nlm.nih.gov/genomes/all/GCA/006/384/855/GCA_006384855.1_TSEL_PacBio_SMRT	SAMN11613237	PRJNA542153	GCA_006384855.1	Contig	227.954	57.9		VCJN01	3613	2019-06-21T00:00:00Z	ftp://ftp.ncbi.nlm.nih.gov/genomes/all/GCA/006/384/855/GCA_006384855.1_TSEL_PacBio_SMRT
45	Picocystis	ftp://ftp.ncbi.nlm.nih.gov/genomes/all/GCA/003/665/715/GCA_003665715.1_OU_Pico_1.0	SAMN10038529	PRJNA490491	GCA_003665715.1	Contig	29.6462	53.6		QYZS01	318	2018-10-16T00:00:00Z
46	Ulva mutabilis	ftp://ftp.ncbi.nlm.nih.gov/genomes/all/GCA/900/538/255/GCA_900538255.1_Ulvmu_WT_fa	SAMEA104719794	PRJEB25750	GCA_900538255.1	Scaffold	98.4847	57.1		UNSF01	318	2018-09-12T00:00:00Z	ftp://ftp.ncbi.nlm.nih.gov/genomes/all/GCA/900/538/255/GCA_900538255.1_Ulvmu_WT_fa
47	Ulva prolifera	ftp://ftp.ncbi.nlm.nih.gov/genomes/all/GCA/004/138/255/GCA_004138255.1_ASM413825v1	SAMN09766007	PRJNA484545	GCA_004138255.1	Scaffold	87.8893	55.1		SDUY01	597	2019-02-05T00:00:00Z	ftp://ftp.ncbi.nlm.nih.gov/genomes/all/GCA/004/138/255/GCA_004138255.1_ASM413825v1
48	Parachlorella kessleri	ftp://ftp.ncbi.nlm.nih.gov/genomes/all/GCA/001/598/975/GCA_001598975.1_PK2152_assembly	SAMD00025188	PRJDB3487	GCA_001598975.1	Contig	59.1878	58.3		BBXU01	3651	2015-12-19T00:00:00Z	ftp://ftp.ncbi.nlm.nih.gov/genomes/all/GCA/001/598/975/GCA_001598975.1_PK2152_assembly
49	Helicosporidium	ftp://ftp.ncbi.nlm.nih.gov/genomes/all/GCA/000/690/575/GCA_000690575.1_Helico_v1.0	SAMN02384563	PRJNA188927	GCA_000690575.1	Contig	12.3738	61.7		AYPS01	5666	2014-05-13T00:00:00Z
51	Auxenochlorella pyrenoidosa	ftp://ftp.ncbi.nlm.nih.gov/genomes/all/GCA/001/430/745/GCA_001430745.1_ASM143074v1	SAMN02954480	PRJNA171991	GCA_001430745.1	Scaffold	56.993	64		ANZC01	1346	2015-11-03T00:00:00Z	ftp://ftp.ncbi.nlm.nih.gov/genomes/all/GCA/001/430/745/GCA_001430745.1_ASM143074v1
52	Auxenochlorella protothecoides	ftp://ftp.ncbi.nlm.nih.gov/genomes/all/GCF/000/733/215/GCF_000733215.1_ASM73321v1	SAMN02433493	PRJNA182710	GCA_000733215.1	Scaffold	22.9246	62.8		APJO01	374	2014-07-23T00:00:00Z	ftp://ftp.ncbi.nlm.nih.gov/genomes/all/GCA/000/733/215/GCA_000733215.1_ASM73321v1
53	Micractinium conductrix	ftp://ftp.ncbi.nlm.nih.gov/genomes/all/GCA/002/245/815/GCA_002245815.2_ASM224581v2	SAMN03863807	PRJNA290385	GCA_002245815.2	Contig	61.0189	67.1615	mitochondrion MT:CM009643.1; chloroplast Pltd:CM009644.1	LHPF02	300	2017-08-10T00:00:00Z	ftp://ftp.ncbi.nlm.nih.gov/genomes/all/GCA/002/245/815/GCA_002245815.2_ASM224581v2
54	Chlorella sorokiniana	ftp://ftp.ncbi.nlm.nih.gov/genomes/all/GCA/003/130/725/GCA_003130725.1_ASM313072v1	SAMN08200531	PRJNA422912	GCA_003130725.1	Chromosome	58.5349	63.827	chromosome 5:CM009865.1; chromosome 6:CM009866.1; chromosome 8:CM009867.1; chromosome 10:CM009868.1; chromosome 11:CM009869.1; chromosome 12:CM009870.1	PKFC01	20	2018-05-17T00:00:00Z	ftp://ftp.ncbi.nlm.nih.gov/genomes/all/GCA/003/130/725/GCA_003130725.1_ASM313072v1
55	Chlorella variabilis	ftp://ftp.ncbi.nlm.nih.gov/genomes/all/GCF/000/147/415/GCF_000147415.1_v_1.0	SAMN02744065	PRJNA45853	GCA_000147415.1	Scaffold	46.1595	65.5		ADIC01	414	2010-08-31T00:00:00Z	ftp://ftp.ncbi.nlm.nih.gov/genomes/all/GCA/000/147/415/GCA_000147415.1_v_1.0
56	Chlorella vulgaris	ftp://ftp.ncbi.nlm.nih.gov/genomes/all/GCA/001/021/125/GCA_001021125.1_ASM102112v1	SAMN03453227	PRJNA278897	GCA_001021125.1	Scaffold	37.3422	61.5		LDKB01	3600	2015-06-05T00:00:00Z	ftp://ftp.ncbi.nlm.nih.gov/genomes/all/GCA/001/021/125/GCA_001021125.1_ASM102112v1
57	Prototheca bovis	ftp://ftp.ncbi.nlm.nih.gov/genomes/all/GCA/003/612/995/GCA_003612995.1_ASM361299v1	SAMN07183812	PRJNA388740	GCA_003612995.1	Contig	24.7449	73.5		PGFX01	4555	2018-10-04T00:00:00Z	ftp://ftp.ncbi.nlm.nih.gov/genomes/all/GCA/003/612/995/GCA_003612995.1_ASM361299v1
58	Prototheca ciferrii	ftp://ftp.ncbi.nlm.nih.gov/genomes/all/GCA/003/613/005/GCA_003613005.1_ASM361300v1	SAMN07183811	PRJNA388740	GCA_003613005.1	Scaffold	26.4489	66.3		PEIA01	6956	2018-10-04T00:00:00Z	ftp://ftp.ncbi.nlm.nih.gov/genomes/all/GCA/003/613/005/GCA_003613005.1_ASM361300v1
59	Prototheca cutis	ftp://ftp.ncbi.nlm.nih.gov/genomes/all/GCA/002/897/115/GCA_002897115.1_JCM_15793_assembly_v001	SAMD00028389	PRJDB3669	GCA_002897115.1	Scaffold	19.9692	60.2		BCIH01	29	2017-11-16T00:00:00Z	ftp://ftp.ncbi.nlm.nih.gov/genomes/all/GCA/002/897/115/GCA_002897115.1_JCM_15793_assembly_v001
60	Prototheca stagnorum	ftp://ftp.ncbi.nlm.nih.gov/genomes/all/GCA/002/794/665/GCA_002794665.1_JCM_9641_assembly_v001	SAMD00028436	PRJDB3715	GCA_002794665.1	Scaffold	16.8962	71.4		BCJY01	27	2017-11-16T00:00:00Z	ftp://ftp.ncbi.nlm.nih.gov/genomes/all/GCA/002/794/665/GCA_002794665.1_JCM_9641_assembly_v001
61	Prototheca wickerhamii	ftp://ftp.ncbi.nlm.nih.gov/genomes/all/GCA/003/255/715/GCA_003255715.1_ASM325571v1	SAMN08930906	PRJNA338014	GCA_003255715.1	Scaffold	27.6911	61.4745	mitochondrion MT:CM009948.1; plastid Pltd:CM009949.1	QBLF01	3774	2018-05-11T00:00:00Z	ftp://ftp.ncbi.nlm.nih.gov/genomes/all/GCA/003/255/715/GCA_003255715.1_ASM325571v1
62	Prototheca zopfii	ftp://ftp.ncbi.nlm.nih.gov/genomes/all/GCA/003/612/995/GCA_003612995.1_ASM361299v1	SAMN07183812	PRJNA388740	GCA_003612995.1	Contig	24.7449	73.5		PGFX01	4555	2018-10-04T00:00:00Z	ftp://ftp.ncbi.nlm.nih.gov/genomes/all/GCA/003/612/995/GCA_003612995.1_ASM361299v1
63	Chloroidium	ftp://ftp.ncbi.nlm.nih.gov/genomes/all/GCA/004/335/625/GCA_004335625.1_ASM433562v1	SAMN08335859	PRJNA428298	GCA_004335625.1	Scaffold	54.3121	50.3		QAXJ01	72	2019-03-08T00:00:00Z
64	Chlorella	ftp://ftp.ncbi.nlm.nih.gov/genomes/all/GCA/003/063/905/GCA_003063905.1_ASM306390v1	SAMN07714505	PRJNA412448	GCA_003063905.1	Scaffold	40.934	68.1		PCFQ01	82	2018-04-23T00:00:00Z
65	Picochlorum	ftp://ftp.ncbi.nlm.nih.gov/genomes/all/GCA/000/876/415/GCA_000876415.1_ASM87641v1	SAMN02739349	PRJNA245752	GCA_000876415.1	Scaffold	13.3907	46.1		JPID01	880	2014-07-28T00:00:00Z
66	Botryococcus braunii	ftp://ftp.ncbi.nlm.nih.gov/genomes/all/GCA/002/005/505/GCA_002005505.1_B_braunii_Showa_v1	SAMN00120186	PRJNA60039	GCA_002005505.1	Scaffold	184.382	50.8		MVGU01	2751	2017-02-22T00:00:00Z	ftp://ftp.ncbi.nlm.nih.gov/genomes/all/GCA/002/005/505/GCA_002005505.1_B_braunii_Showa_v1
67	Coccomyxa	ftp://ftp.ncbi.nlm.nih.gov/genomes/all/GCA/000/812/005/GCA_000812005.1_ASM81200v1	SAMN03248237	PRJNA269066	GCA_000812005.1	Scaffold	48.5465	54.7		JUGA01	106	2014-12-30T00:00:00Z
68	Coccomyxa subellipsoidea C-169	ftp://ftp.ncbi.nlm.nih.gov/genomes/all/GCF/000/258/705/GCF_000258705.1_Coccomyxa_subellipsoidae_v2.0	SAMN02744078	PRJNA32657	GCA_000258705.1	Contig	48.8266	52.9		AGSI01	29	2012-04-13T00:00:00Z	ftp://ftp.ncbi.nlm.nih.gov/genomes/all/GCA/000/258/705/GCA_000258705.1_Coccomyxa_subellipsoidae_v2.0
69	unclassified Trebouxiophyceae	ftp://ftp.ncbi.nlm.nih.gov/genomes/all/GCA/003/568/905/GCA_003568905.1_KSI-1_01	SAMD00134990	PRJDB7314	GCA_003568905.1	Scaffold	44.6862	64.1		BHFV01	22485	2018-08-29T00:00:00Z	ftp://ftp.ncbi.nlm.nih.gov/genomes/all/GCA/003/568/905/GCA_003568905.1_KSI-1_01
70	Trebouxia	ftp://ftp.ncbi.nlm.nih.gov/genomes/all/GCA/002/118/135/GCA_002118135.1_TrTZW2008_1.0	SAMD00066476	PRJDB5287	GCA_002118135.1	Scaffold	69.3465	49.7		BDIU01	677	2017-03-31T21:29:00Z
71	Trebouxia gelatinosa	ftp://ftp.ncbi.nlm.nih.gov/genomes/all/GCA/000/818/905/GCA_000818905.1_ASM81890v1	SAMN03104849	PRJNA263654	GCA_000818905.1	Scaffold	61.7262	50.4		JUBA01	848	2015-01-15T00:00:00Z	ftp://ftp.ncbi.nlm.nih.gov/genomes/all/GCA/000/818/905/GCA_000818905.1_ASM81890v1
72	Chlorokybus atmophyticus	ftp://ftp.ncbi.nlm.nih.gov/genomes/all/GCA/009/103/225/GCA_009103225.1_ASM910322v1	SAMN10351691	PRJNA498917	GCA_009103225.1	Scaffold	74.3303	50.3		RHPI01	3809	2019-10-15T00:00:00Z	ftp://ftp.ncbi.nlm.nih.gov/genomes/all/GCA/009/103/225/GCA_009103225.1_ASM910322v1
73	Mesostigma viride	ftp://ftp.ncbi.nlm.nih.gov/genomes/all/GCA/004/000/685/GCA_004000685.1_MeVI296_assembly3	SAMD00151924	PRJDB7683	GCA_004000685.1	Contig	145.899	54.2		BIFU01	52785	2018-12-15T00:00:00Z	ftp://ftp.ncbi.nlm.nih.gov/genomes/all/GCA/004/000/685/GCA_004000685.1_MeVI296_assembly3
74	Klebsormidium nitens	ftp://ftp.ncbi.nlm.nih.gov/genomes/all/GCA/000/708/835/GCA_000708835.1_ASM70883v1	SAMD00000399	PRJDB718	GCA_000708835.1	Scaffold	104.21	52.3703	chloroplast Pltd:DF238762.1; mitochondrion MT:DF238763.1	BANV01	1814	2014-05-29T00:00:00Z	ftp://ftp.ncbi.nlm.nih.gov/genomes/all/GCA/000/708/835/GCA_000708835.1_ASM70883v1
75	Chara braunii	ftp://ftp.ncbi.nlm.nih.gov/genomes/all/GCA/003/427/395/GCA_003427395.1_Cbr_1.0	SAMD00044344	PRJDB3348	GCA_003427395.1	Scaffold	1751.21	39.5		BFEA01	11654	2018-07-13T21:44:00Z	ftp://ftp.ncbi.nlm.nih.gov/genomes/all/GCA/003/427/395/GCA_003427395.1_Cbr_1.0
76	Mesotaenium endlicherianum	ftp://ftp.ncbi.nlm.nih.gov/genomes/all/GCA/009/602/735/GCA_009602735.1_ASM960273v1	SAMN11774796	PRJNA543678	GCA_009602735.1	Scaffold	173.751	46.9		WELA01	13861	2019-11-06T00:00:00Z	ftp://ftp.ncbi.nlm.nih.gov/genomes/all/GCA/009/602/735/GCA_009602735.1_ASM960273v1
78	Physcomitrella patens	ftp://ftp.ncbi.nlm.nih.gov/genomes/all/GCF/000/002/425/GCF_000002425.4_Phypa_V3	SAMN00120126	PRJNA13064	GCA_000002425.2	Chromosome	472.081	33.8892	chromosome 1:NC_037253.1/CM009316.1; chromosome 2:NC_037254.1/CM009317.1; chromosome 3:NC_037255.1/CM009318.1; chromosome 4:NC_037256.1/CM009319.1; chromosome 5:NC_037257.1/CM009320.1; chromosome 6:NC_037258.1/CM009321.1; chromosome 7:NC_037259.1/CM009322.1; chromosome 8:NC_037260.1/CM009323.1; chromosome 9:NC_037261.1/CM009324.1; chromosome 10:NC_037262.1/CM009325.1; chromosome 11:NC_037263.1/CM…	ABEU02	359	2007-11-27T00:00:00Z	ftp://ftp.ncbi.nlm.nih.gov/genomes/all/GCA/000/002/425/GCA_000002425.2_Phypa_V3
79	Pleurozium schreberi	ftp://ftp.ncbi.nlm.nih.gov/genomes/all/GCA/006/891/605/GCA_006891605.1_SU_Pschr_1.0	SAMN10578977	PRJNA509035	GCA_006891605.1	Contig	220.032	38.2		VACF01	2689	2019-07-11T00:00:00Z	ftp://ftp.ncbi.nlm.nih.gov/genomes/all/GCA/006/891/605/GCA_006891605.1_SU_Pschr_1.0
80	Marchantia inflexa	ftp://ftp.ncbi.nlm.nih.gov/genomes/all/GCA/006/177/815/GCA_006177815.1_M_inflexa_v1.1	SAMN09430624	PRJNA476339	GCA_006177815.1	Scaffold	208.753	32.9		QLSQ01	41556	2019-06-10T00:00:00Z	ftp://ftp.ncbi.nlm.nih.gov/genomes/all/GCA/006/177/815/GCA_006177815.1_M_inflexa_v1.1
81	Marchantia polymorpha	ftp://ftp.ncbi.nlm.nih.gov/genomes/all/GCA/003/032/435/GCA_003032435.1_Marchanta_polymorpha_v1	SAMN00769973	PRJNA53523	GCA_003032435.1	Scaffold	225.761	42.5		PNPG01	2957	2018-01-10T00:00:00Z	ftp://ftp.ncbi.nlm.nih.gov/genomes/all/GCA/003/032/435/GCA_003032435.1_Marchanta_polymorpha_v1
82	Selaginella kraussiana	ftp://ftp.ncbi.nlm.nih.gov/genomes/all/GCA/001/021/135/GCA_001021135.1_ASM102113v1	SAMN03704959	PRJNA284650	GCA_001021135.1	Scaffold	114.503	44.7		LDJE01	105914	2015-06-05T00:00:00Z	ftp://ftp.ncbi.nlm.nih.gov/genomes/all/GCA/001/021/135/GCA_001021135.1_ASM102113v1
83	Selaginella moellendorffii	ftp://ftp.ncbi.nlm.nih.gov/genomes/all/GCF/000/143/415/GCF_000143415.4_v1.0	SAMN02981255	PRJNA13078	GCA_000143415.2	Scaffold	212.315	45.3		ADFJ01	757	2010-06-24T00:00:00Z	ftp://ftp.ncbi.nlm.nih.gov/genomes/all/GCA/000/143/415/GCA_000143415.2_v1.0
84	Selaginella tamariscina	ftp://ftp.ncbi.nlm.nih.gov/genomes/all/GCA/003/024/785/GCA_003024785.1_ASM302478v1	SAMN07840812	PRJNA416064	GCA_003024785.1	Scaffold	300.729	37.4		PUQB01	1391	2018-03-29T00:00:00Z	ftp://ftp.ncbi.nlm.nih.gov/genomes/all/GCA/003/024/785/GCA_003024785.1_ASM302478v1
85	Adiantum capillus-veneris	unpublish
86	Azolla filliculoides	ftp://ftp.fernbase.org/Salvinia_cucullata/Salvinia_asm_v1.2
87	Salvinia cucullata	ftp://ftp.fernbase.org/Azolla_filiculoides/Azolla_asm_v1.1
89	Gnetum montanum	https://www.datadryad.org/resource/doi:10.5061/dryad.0vm37.1
91	Picea glauca	ftp://ftp.ncbi.nlm.nih.gov/genomes/all/GCA/000/411/955/GCA_000411955.5_PG29_v4.1	SAMN01120252	PRJNA83435	GCA_000411955.5	Scaffold	24633.1	44.5811	chloroplast Pltd:KT634228.1	ALWZ04	3033322	2013-05-17T00:00:00Z	ftp://ftp.ncbi.nlm.nih.gov/genomes/all/GCA/000/411/955/GCA_000411955.5_PG29_v4.1
92	Pinus taeda	ftp://ftp.ncbi.nlm.nih.gov/genomes/all/GCA/000/404/065/GCA_000404065.3_Ptaeda2.0	SAMN02981512	PRJNA174450	GCA_000404065.3	Scaffold	22103.6	34.8		APFE03	1760464	2015-08-06T00:00:00Z	ftp://ftp.ncbi.nlm.nih.gov/genomes/all/GCA/000/404/065/GCA_000404065.3_Ptaeda2.0
93	Pinus lambertiana	ftp://ftp.ncbi.nlm.nih.gov/genomes/all/GCA/001/447/015/GCA_001447015.2_Sugar_pine_JHU_assembly	SAMN03354659	PRJNA174450	GCA_001447015.2	Scaffold	27602.7	3.1		LMTP01	4253097	2015-11-17T00:00:00Z	ftp://ftp.ncbi.nlm.nih.gov/genomes/all/GCA/001/447/015/GCA_001447015.2_Sugar_pine_JHU_assembly
94	Pseudotsuga menziesii	ftp://ftp.ncbi.nlm.nih.gov/genomes/all/GCA/001/517/045/GCA_001517045.1_DougFir1.0	SAMN03333061	PRJNA174450	GCA_001517045.1	Scaffold	14673.2	36.5		LPNX01	1236665	2015-12-22T00:00:00Z	ftp://ftp.ncbi.nlm.nih.gov/genomes/all/GCA/001/517/045/GCA_001517045.1_DougFir1.0
95	Sequoiadendron giganteum	ftp://ftp.ncbi.nlm.nih.gov/genomes/all/GCA/007/115/665/GCA_007115665.1_SEGI.1.0	SAMN11640747	PRJNA541481	GCA_007115665.1	Scaffold	8122.13	51.3639	chloroplast Pltd:CM017437.1	VCHN01	39798	2019-07-18T00:00:00Z	ftp://ftp.ncbi.nlm.nih.gov/genomes/all/GCA/007/115/665/GCA_007115665.1_SEGI.1.0
95	Sequoiadendron giganteum	ftp://ftp.ncbi.nlm.nih.gov/genomes/all/GCA/007/115/665/GCA_007115665.1_SEGI.1.0	SAMN11640747	PRJNA541481	GCA_007115665.1	Scaffold	8122.13	51.3639	chloroplast Pltd:CM017437.1	VCHN01	39798	2019-07-18T00:00:00Z	ftp://ftp.ncbi.nlm.nih.gov/genomes/all/GCA/007/115/665/GCA_007115665.1_SEGI.1.0
96	Sequoia sempervirens	ftp://ftp.ncbi.nlm.nih.gov/genomes/all/GCA/007/258/455/GCA_007258455.1_SESE.1.0	SAMN11654426	PRJNA542879	GCA_007258455.1	Scaffold	26537.2	35.4	chloroplast Pltd:CM017438.1	VDFB01	517852	2019-07-22T00:00:00Z	ftp://ftp.ncbi.nlm.nih.gov/genomes/all/GCA/007/258/455/GCA_007258455.1_SESE.1.0
97	Amborella trichopoda	ftp://ftp.ncbi.nlm.nih.gov/genomes/all/GCF/000/471/905/GCF_000471905.2_AMTR1.0	SAMN02313977	PRJNA212863	GCA_000471905.1	Scaffold	706.495	38.1	chloroplast Pltd:NC_005086.1/	AWHE01	5746	2013-09-27T00:00:00Z	ftp://ftp.ncbi.nlm.nih.gov/genomes/all/GCA/000/471/905/GCA_000471905.1_AMTR1.0
98	Nymphaea colorata	ftp://ftp.ncbi.nlm.nih.gov/genomes/all/GCA/008/831/285/GCA_008831285.1_ASM883128v1	SAMN12766378	PRJNA587754	GCA_008831285.1	Chromosome	409.014	38.5888	chromosome 1:CM018369.1; chromosome 2:CM018370.1; chromosome 3:CM018371.1; chromosome 4:CM018372.1; chromosome 5:CM018373.1; chromosome 6:CM018374.1; chromosome 7:CM018375.1; chromosome 8:CM018376.1; chromosome 9:CM018377.1; chromosome 10:CM018378.1; chromosome 11:CM018379.1; chromosome 12:CM018380.1; chromosome 13:CM018381.1; chromosome 14:CM018382.1; mitochondrion:NC_037468.1/	VYXN01	800	2019-09-24T00:00:00Z	ftp://ftp.ncbi.nlm.nih.gov/genomes/all/GCA/008/831/285/GCA_008831285.1_ASM883128v1
99	Cinnamomum micranthum	ftp://ftp.ncbi.nlm.nih.gov/genomes/all/GCA/003/546/025/GCA_003546025.1_ASBRC_Ckan_1.0	SAMN09509728	PRJNA477266	GCA_003546025.1	Scaffold	730.416	38.2		QPKB01	2150	2018-09-11T00:00:00Z
100	Persea americana	ftp://ftp.ncbi.nlm.nih.gov/genomes/all/GCA/002/908/915/GCA_002908915.1_Hass1.0	SAMN07709230	PRJNA412302	GCA_002908915.1	Contig	446.756	39		NXHZ01	5000	2018-01-30T00:00:00Z	ftp://ftp.ncbi.nlm.nih.gov/genomes/all/GCA/002/908/915/GCA_002908915.1_Hass1.0
101	Liriodendron chinense	ftp://ftp.ncbi.nlm.nih.gov/genomes/all/GCA/003/013/855/GCA_003013855.2_NJFU_Lchi_2.0	SAMN08026720	PRJNA418360	GCA_003013855.2	Scaffold	1742.42	41.5		PVNU02	3710	2018-03-21T00:00:00Z	ftp://ftp.ncbi.nlm.nih.gov/genomes/all/GCA/003/013/855/GCA_003013855.2_NJFU_Lchi_2.0
102	Magnolia ashei	ftp://ftp.ncbi.nlm.nih.gov/genomes/all/GCA/003/571/905/GCA_003571905.1_ASM357190v1	SAMN07722838	PRJNA412672	GCA_003571905.1	Scaffold	284.512	39.5		PCNC01	265493	2018-09-17T00:00:00Z	ftp://ftp.ncbi.nlm.nih.gov/genomes/all/GCA/003/571/905/GCA_003571905.1_ASM357190v1
103	Spirodela polyrhiza	ftp://ftp.ncbi.nlm.nih.gov/genomes/all/GCA/001/981/405/GCA_001981405.1_ASM198140v1	SAMN04386762	PRJNA308109	GCA_001981405.1	Chromosome	136.67	42.7191	chromosome 1:CP019093.1; chromosome 2:CP019094.1; chromosome 3:CP019095.1; chromosome 4:CP019096.1; chromosome 5:CP019097.1; chromosome 6:CP019098.1; chromosome 7:CP019099.1; chromosome 8:CP019100.1; chromosome 9:CP019101.1; chromosome 10:CP019102.1; chromosome 11:CP019103.1; chromosome 12:CP019104.1; chromosome 13:CP019105.1; chromosome 14:CP019106.1; chromosome 15:CP019107.1; chromosome 16:CP01…		20	2017-01-17T00:00:00Z	ftp://ftp.ncbi.nlm.nih.gov/genomes/all/GCA/001/981/405/GCA_001981405.1_ASM198140v1
104	Zostera marina	ftp://ftp.ncbi.nlm.nih.gov/genomes/all/GCA/001/185/155/GCA_001185155.1_Zosma_marina.v.2.1	SAMN00991190	PRJNA41721	GCA_001185155.1	Scaffold	203.914	38.9		LFYR01	2228	2015-07-22T00:00:00Z	ftp://ftp.ncbi.nlm.nih.gov/genomes/all/GCA/001/185/155/GCA_001185155.1_Zosma_marina.v.2.1
105	Dioscorea alata	ftp://ftp.ncbi.nlm.nih.gov/genomes/all/GCA/002/904/275/GCA_002904275.2_ASM290427v2	SAMEA3542249	PRJEB10904	GCA_002904275.2	Scaffold	620.909	36.1		CZHE02	57706	2015-10-10T00:00:00Z	ftp://ftp.ncbi.nlm.nih.gov/genomes/all/GCA/002/904/275/GCA_002904275.2_ASM290427v2
106	Dioscorea rotundata	ftp://ftp.ncbi.nlm.nih.gov/genomes/all/GCA/002/240/015/GCA_002240015.2_TDr96_F1_Pseudo_Chromosome_v1.0	SAMD00039982	PRJDB3383	GCA_002240015.2	Chromosome	456.675	31.5652	chromosome 1:BDMI01000001.1; chromosome 2:BDMI01000002.1; chromosome 3:BDMI01000003.1; chromosome 4:BDMI01000004.1; chromosome 5:BDMI01000005.1; chromosome 6:BDMI01000006.1; chromosome 7:BDMI01000007.1; chromosome 8:BDMI01000008.1; chromosome 9:BDMI01000009.1; chromosome 10:BDMI01000010.1; chromosome 11:BDMI01000011.1; chromosome 12:BDMI01000012.1; chromosome 13:BDMI01000013.1; chromosome 14:BDMI…	BDMI01	21	2017-07-28T00:00:00Z	ftp://ftp.ncbi.nlm.nih.gov/genomes/all/GCA/002/240/015/GCA_002240015.2_TDr96_F1_Pseudo_Chromosome_v1.0
107	Trichopus zeylanicus	ftp://ftp.ncbi.nlm.nih.gov/genomes/all/GCA/005/019/695/GCA_005019695.1_DCB_TZT_HYBRID.1.1	SAMN09770388	PRJNA484861	GCA_005019695.1	Scaffold	713.407	36.5		RXID01	22601	2019-05-01T00:00:00Z
108	Xerophyta viscosa	ftp://ftp.ncbi.nlm.nih.gov/genomes/all/GCA/002/076/135/GCA_002076135.1_ASM207613v1	SAMN03940242	PRJNA291133	GCA_002076135.1	Scaffold	295.462	36.3		MJHO01	896	2017-03-31T00:00:00Z	ftp://ftp.ncbi.nlm.nih.gov/genomes/all/GCA/002/076/135/GCA_002076135.1_ASM207613v1
109	Asparagus officinalis	ftp://ftp.ncbi.nlm.nih.gov/genomes/all/GCF/001/876/935/GCF_001876935.1_Aspof.V1	SAMN04606231	PRJNA376608	GCA_001876935.1	Chromosome	1187.54	39.3594	chromosome 1:NC_033794.1/CM007381.1; chromosome 2:NC_033795.1/CM007382.1; chromosome 3:NC_033796.1/CM007383.1; chromosome 4:NC_033797.1/CM007384.1; chromosome 5:NC_033798.1/CM007385.1; chromosome 6:NC_033799.1/CM007386.1; chromosome 7:NC_033800.1/CM007387.1; chromosome 8:NC_033801.1/CM007388.1; chromosome 9:NC_033802.1/CM007389.1; chromosome 10:NC_033803.1/CM007390.1	MPDI01	11792	2016-11-09T00:00:00Z	ftp://ftp.ncbi.nlm.nih.gov/genomes/all/GCA/001/876/935/GCA_001876935.1_Aspof.V1
110	Apostasia shenzhenica	ftp://ftp.ncbi.nlm.nih.gov/genomes/all/GCA/002/786/265/GCA_002786265.1_ASM278626v1	SAMN04453324	PRJNA310678	GCA_002786265.1	Scaffold	348.733	34.9		PEFY01	2985	2017-11-17T00:00:00Z	ftp://ftp.ncbi.nlm.nih.gov/genomes/all/GCA/002/786/265/GCA_002786265.1_ASM278626v1
111	Gastrodia elata	ftp://ftp.ncbi.nlm.nih.gov/genomes/all/GCA/002/966/915/GCA_002966915.1_ASM296691v1	SAMN07125589	PRJNA386713	GCA_002966915.1	Scaffold	1060.98	33.4		PVEL01	3768	2018-03-02T00:00:00Z
112	Dendrobium catenatum	ftp://ftp.ncbi.nlm.nih.gov/genomes/all/GCF/001/605/985/GCF_001605985.2_ASM160598v2	SAMN03083363	PRJNA262478	GCA_001605985.2	Scaffold	1104.26	35.2003	chloroplast Pltd:NC_037361.1/	JSDN02	286090	2016-02-26T00:00:00Z	ftp://ftp.ncbi.nlm.nih.gov/genomes/all/GCA/001/605/985/GCA_001605985.2_ASM160598v2
113	Phalaenopsis aphrodite	ftp://ftp.ncbi.nlm.nih.gov/genomes/all/GCA/003/013/225/GCA_003013225.1_ASM301322v1	SAMN06768338	PRJNA383284	GCA_003013225.1	Scaffold	1025.1	30.4		NEWO01	13732	2018-03-21T00:00:00Z	ftp://ftp.ncbi.nlm.nih.gov/genomes/all/GCA/003/013/225/GCA_003013225.1_ASM301322v1
114	Phalaenopsis equestris	ftp://ftp.ncbi.nlm.nih.gov/genomes/all/GCF/001/263/595/GCF_001263595.1_ASM126359v1	SAMN02046388	PRJNA382149	GCA_001263595.1	Scaffold	1064.2	35.5002	chloroplast Pltd:NC_017609.1/	APLD01	89584	2015-08-07T00:00:00Z	ftp://ftp.ncbi.nlm.nih.gov/genomes/all/GCA/001/263/595/GCA_001263595.1_ASM126359v1
115	Phalaenopsis hybrid cultivar	ftp://ftp.ncbi.nlm.nih.gov/genomes/all/GCA/002/079/205/GCA_002079205.1_ASM207920v1	SAMN03275712	PRJNA271641	GCA_002079205.1	Scaffold	2687.66	30		JXCR01	149149	2017-04-04T00:00:00Z	ftp://ftp.ncbi.nlm.nih.gov/genomes/all/GCA/002/079/205/GCA_002079205.1_ASM207920v1
116	Vanilla planifolia	ftp://ftp.ncbi.nlm.nih.gov/genomes/all/GCA/004/338/375/GCA_004338375.1_Vapla0.1.4	SAMN10484643	PRJNA507095	GCA_004338375.1	Scaffold	2203.64	24.8		SDXO01	794534	2019-03-11T00:00:00Z	ftp://ftp.ncbi.nlm.nih.gov/genomes/all/GCA/004/338/375/GCA_004338375.1_Vapla0.1.4
117	Cocos nucifera	ftp://ftp.ncbi.nlm.nih.gov/genomes/all/GCA/003/604/295/GCA_003604295.1_ASM360429v1	SAMN07738886	PRJNA413280	GCA_003604295.1	Scaffold	1839.17	31.8		PDMH01	59328	2018-10-01T00:00:00Z	ftp://ftp.ncbi.nlm.nih.gov/genomes/all/GCA/003/604/295/GCA_003604295.1_ASM360429v1
118	Elaeis guineensis	ftp://ftp.ncbi.nlm.nih.gov/genomes/all/GCF/000/442/705/GCF_000442705.1_EG5	SAMN02981535	PRJNA268357	GCA_000442705.1	Chromosome	1535.18	40.999	chromosome 1:NC_025993.1/CM002081.1; chromosome 2:NC_025994.1/CM002082.1; chromosome 3:NC_025995.1/CM002083.1; chromosome 4:NC_025996.1/CM002084.1; chromosome 5:NC_025997.1/CM002085.1; chromosome 6:NC_025998.1/CM002086.1; chromosome 7:NC_025999.1/CM002087.1; chromosome 8:NC_026000.1/CM002088.1; chromosome 9:NC_026001.1/CM002089.1; chromosome 10:NC_026002.1/CM002090.1; chromosome 11:NC_026003.1/CM…	ASJS01	40349	2013-07-26T00:00:00Z	ftp://ftp.ncbi.nlm.nih.gov/genomes/all/GCA/000/442/705/GCA_000442705.1_EG5
119	Elaeis oleifera	ftp://ftp.ncbi.nlm.nih.gov/genomes/all/GCA/000/441/515/GCA_000441515.1_EO8	SAMN02981531	PRJNA183707	GCA_000441515.1	Scaffold	1402.73	40.8		ASIR01	26756	2013-07-25T00:00:00Z	ftp://ftp.ncbi.nlm.nih.gov/genomes/all/GCA/000/441/515/GCA_000441515.1_EO8
120	Calamus simplicifolius	ftp://ftp.ncbi.nlm.nih.gov/genomes/all/GCA/900/491/605/GCA_900491605.1_Calamus_simplicifolius	SAMEA104450374	PRJEB24031	GCA_900491605.1	Scaffold	1960.81	39.6		UESW01	5116	2018-06-22T00:00:00Z	ftp://ftp.ncbi.nlm.nih.gov/genomes/all/GCA/900/491/605/GCA_900491605.1_Calamus_simplicifolius
121	Phoenix dactylifera	ftp://ftp.ncbi.nlm.nih.gov/genomes/all/GCF/000/413/155/GCF_000413155.1_DPV01	SAMN02981540	PRJNA249070	GCA_000413155.1	Scaffold	556.481	40.1056	mitochondrion MT:NC_016740.1/; chloroplast Pltd:NC_013991.2/	ATBV01	80317	2013-06-19T00:00:00Z	ftp://ftp.ncbi.nlm.nih.gov/genomes/all/GCA/000/413/155/GCA_000413155.1_DPV01
122	Ananas comosus	ftp://ftp.ncbi.nlm.nih.gov/genomes/all/GCF/001/540/865/GCF_001540865.1_ASM154086v1	SAMN04316497	PRJNA371634	GCA_001540865.1	Chromosome	382.056	38.5371	linkage group 1:NC_033621.1/CM003813.1; linkage group 2:NC_033622.1/CM003814.1; linkage group 3:NC_033623.1/CM003815.1; linkage group 4:NC_033624.1/CM003816.1; linkage group 5:NC_033625.1/CM003817.1; linkage group 6:NC_033626.1/CM003818.1; linkage group 7:NC_033627.1/CM003819.1; linkage group 8:NC_033628.1/CM003820.1; linkage group 9:NC_033629.1/CM003821.1; linkage group 10:NC_033630.1/CM003822.1…	LODP01	3129	2016-01-25T00:00:00Z	ftp://ftp.ncbi.nlm.nih.gov/genomes/all/GCA/001/540/865/GCA_001540865.1_ASM154086v1
123	Raddia distichophylla	ftp://ftp.ncbi.nlm.nih.gov/genomes/all/GCA/005/191/435/GCA_005191435.1_ASM519143v1	SAMN11175023	PRJNA528150	GCA_005191435.1	Scaffold	580.833	43.6		SPJY01	38257	2019-05-06T00:00:00Z	ftp://ftp.ncbi.nlm.nih.gov/genomes/all/GCA/005/191/435/GCA_005191435.1_ASM519143v1
124	Leersia perrieri	ftp://ftp.ncbi.nlm.nih.gov/genomes/all/GCA/000/325/765/GCA_000325765.3_Lperr_V1.4	SAMN02981441	PRJNA163065	GCA_000325765.3	Chromosome	266.688	42.5997	chromosome 1:CM002476.1; chromosome 2:CM002480.1; chromosome 3:CM002481.1; chromosome 4:CM002482.1; chromosome 5:CM002483.1; chromosome 6:CM002484.1; chromosome 7:CM002485.1; chromosome 8:CM002486.1; chromosome 9:CM002487.1; chromosome 10:CM002477.1; chromosome 11:CM002478.1; chromosome 12:CM002479.1	ALNV02	12	2012-10-17T00:00:00Z	ftp://ftp.ncbi.nlm.nih.gov/genomes/all/GCA/000/325/765/GCA_000325765.3_Lperr_V1.4
125	Oryza barthii	ftp://ftp.ncbi.nlm.nih.gov/genomes/all/GCA/000/182/155/GCA_000182155.3_O.barthii_v1.3	SAMN02953732	PRJNA30379	GCA_000182155.3	Chromosome	308.272	42.0761	chromosome 1:CM002639.1; chromosome 2:CM002643.2; chromosome 3:CM002644.1; chromosome 4:CM002645.1; chromosome 5:CM002646.2; chromosome 6:CM002647.1; chromosome 7:CM002648.1; chromosome 8:CM002649.1; chromosome 9:CM002650.1; chromosome 10:CM002640.2; chromosome 11:CM002641.2; chromosome 12:CM002642.2	ABRL02	12	2009-04-21T00:00:00Z	ftp://ftp.ncbi.nlm.nih.gov/genomes/all/GCA/000/182/155/GCA_000182155.3_O.barthii_v1.3
126	Oryza brachyantha	ftp://ftp.ncbi.nlm.nih.gov/genomes/all/GCF/000/231/095/GCF_000231095.1_Oryza_brachyantha.v1.4b	SAMN02981362	PRJNA232125	GCA_000231095.2	Chromosome	259.908	41.0964	chromosome 1:NC_023163.1/CM001241.2; chromosome 2:NC_023164.1/CM001242.1; chromosome 3:NC_023165.1/CM001243.2; chromosome 4:NC_023166.1/CM001244.2; chromosome 5:NC_023167.1/CM001245.2; chromosome 6:NC_023168.1/CM001246.2; chromosome 7:NC_023169.1/CM001247.2; chromosome 8:NC_023170.1/CM001248.2; chromosome 9:NC_023171.1/CM001249.2; chromosome 10:NC_023172.1/CM001250.2; chromosome 11:NC_023173.1/CM…	AGAT01	2491	2011-10-19T00:00:00Z	ftp://ftp.ncbi.nlm.nih.gov/genomes/all/GCA/000/231/095/GCA_000231095.2_Oryza_brachyantha.v1.4b
127	Oryza glaberrima	ftp://ftp.ncbi.nlm.nih.gov/genomes/all/GCA/000/147/395/GCA_000147395.2_Oryza_glaberrima_V1	SAMN02981267	PRJNA13765	GCA_000147395.2	Scaffold	303.295	42.8		ADWL01	25599	2010-07-08T00:00:00Z	ftp://ftp.ncbi.nlm.nih.gov/genomes/all/GCA/000/147/395/GCA_000147395.2_Oryza_glaberrima_V1
128	Oryza glumipatula	ftp://ftp.ncbi.nlm.nih.gov/genomes/all/GCA/000/576/495/GCA_000576495.1_Oryza_glumaepatula_v1.5	SAMN02981440	PRJNA48429	GCA_000576495.1	Chromosome	372.86	43.7266	chromosome chr1:CM002512.1; chromosome chr10:CM002513.1; chromosome chr11:CM002514.1; chromosome chr12:CM002515.1; chromosome chr2:CM002516.1; chromosome chr3:CM002517.1; chromosome chr4:CM002518.1; chromosome chr5:CM002519.1; chromosome chr6:CM002520.1; chromosome chr7:CM002521.1; chromosome chr8:CM002522.1; chromosome chr9:CM002523.1	ALNU02	12	2013-02-06T00:00:00Z	ftp://ftp.ncbi.nlm.nih.gov/genomes/all/GCA/000/576/495/GCA_000576495.1_Oryza_glumaepatula_v1.5
129	Oryza longistaminata	ftp://ftp.ncbi.nlm.nih.gov/genomes/all/GCA/001/514/335/GCA_001514335.2_ASM151433v2	SAMN03996572	PRJNA293398	GCA_001514335.2	Chromosome	362.064	43.0773	chromosome 12:CM003671.1; chromosome 1:CM003660.1; chromosome 2:CM003661.1; chromosome 3:CM003662.1; chromosome 4:CM003663.1; chromosome 5:CM003664.1; chromosome 6:CM003665.1; chromosome 7:CM003666.1; chromosome 8:CM003667.1; chromosome 9:CM003668.1; chromosome 10:CM003669.1; chromosome 11:CM003670.1	LQBC01	11745	2016-01-13T00:00:00Z	ftp://ftp.ncbi.nlm.nih.gov/genomes/all/GCA/001/514/335/GCA_001514335.2_ASM151433v2
130	Oryza meridionalis	ftp://ftp.ncbi.nlm.nih.gov/genomes/all/GCA/000/338/895/GCA_000338895.2_Oryza_meridionalis_v1.3	SAMN02981442	PRJNA48433	GCA_000338895.2	Chromosome	335.668	44.1725	chromosome 1:CM002524.1; chromosome 2:CM002525.1; chromosome 3:CM002526.1; chromosome 4:CM002527.1; chromosome 5:CM002528.1; chromosome 6:CM002529.1; chromosome 7:CM002530.1; chromosome 8:CM002531.1; chromosome 9:CM002532.1; chromosome 10:CM002533.1; chromosome 11:CM002534.1; chromosome 12:CM002535.1	ALNW02	12	2012-10-17T00:00:00Z	ftp://ftp.ncbi.nlm.nih.gov/genomes/all/GCA/000/338/895/GCA_000338895.2_Oryza_meridionalis_v1.3
131	Oryza meyeriana var. granulata	ftp://ftp.ncbi.nlm.nih.gov/genomes/all/GCA/003/991/445/GCA_003991445.1_ASM399144v1	SAMN07723085	PRJNA412686	GCA_003991445.1	Contig	776.957	46.3		RYFJ01	4618	2019-01-03T00:00:00Z	ftp://ftp.ncbi.nlm.nih.gov/genomes/all/GCA/003/991/445/GCA_003991445.1_ASM399144v1
132	Oryza punctata	ftp://ftp.ncbi.nlm.nih.gov/genomes/all/GCA/000/573/905/GCA_000573905.1_Oryza_punctata_v1.2	SAMN02981556	PRJNA13770	GCA_000573905.1	Chromosome	393.817	42.8066	chromosome 1:CM002488.1; chromosome 2:CM002489.1; chromosome 3:CM002490.1; chromosome 4:CM002491.1; chromosome 5:CM002492.1; chromosome 6:CM002493.1; chromosome 7:CM002494.1; chromosome 8:CM002495.1; chromosome 9:CM002496.1; chromosome 10:CM002497.1; chromosome 11:CM002498.1; chromosome 12:CM002499.1	AVCL01	12	2014-02-19T00:00:00Z	ftp://ftp.ncbi.nlm.nih.gov/genomes/all/GCA/000/573/905/GCA_000573905.1_Oryza_punctata_v1.2
133	Oryza rufipogon	ftp://ftp.ncbi.nlm.nih.gov/genomes/all/GCA/000/817/225/GCA_000817225.1_OR_W1943	SAMEA3158452	PRJEB4137	GCA_000817225.1	Scaffold	339.177	42.5		CBQP01	3818	2014-12-30T00:00:00Z	ftp://ftp.ncbi.nlm.nih.gov/genomes/all/GCA/000/817/225/GCA_000817225.1_OR_W1943
134	Oryza sativa	ftp://ftp.ncbi.nlm.nih.gov/genomes/all/GCF/000/005/425/GCF_000005425.2_Build_4.0		PRJNA13141	GCA_000005425.2	Chromosome	382.778	42.6517	chromosome 1:AP008207.2; chromosome 2:AP008208.2; chromosome 3:AP008209.2; chromosome 4:AP008210.2; chromosome 5:AP008211.2; chromosome 6:AP008212.2; chromosome 7:AP008213.2; chromosome 8:AP008214.2; chromosome 9:AP008215.2; chromosome 10:AP008216.2; chromosome 11:AP008217.2; chromosome 12:AP008218.2		15	2005-02-02T00:00:00Z	ftp://ftp.ncbi.nlm.nih.gov/genomes/all/GCF/000/005/425/GCF_000005425.2_Build_4.0
135	Oryza sativa f. spontanea	ftp://ftp.ncbi.nlm.nih.gov/genomes/all/GCA/000/576/065/GCA_000576065.1_Oryza_nivara_v1.0	SAMN02981560	PRJNA48107	GCA_000576065.1	Chromosome	337.95	42.9397	chromosome chr1:CM002500.1; chromosome chr10:CM002501.1; chromosome chr11:CM002502.1; chromosome chr12:CM002503.1; chromosome chr2:CM002504.1; chromosome chr3:CM002505.1; chromosome chr4:CM002506.1; chromosome chr5:CM002507.1; chromosome chr6:CM002508.1; chromosome chr7:CM002509.1; chromosome chr8:CM002510.1; chromosome chr9:CM002511.1	AWHD01	12	2014-02-19T00:00:00Z	ftp://ftp.ncbi.nlm.nih.gov/genomes/all/GCA/000/576/065/GCA_000576065.1_Oryza_nivara_v1.0
136	Zizania latifolia	ftp://ftp.ncbi.nlm.nih.gov/genomes/all/GCA/000/418/225/GCA_000418225.1_Zizania_latifolia_v01	SAMN02981538	PRJNA187578	GCA_000418225.1	Scaffold	603.989	44.4		ASSH01	4522	2013-07-03T00:00:00Z	ftp://ftp.ncbi.nlm.nih.gov/genomes/all/GCA/000/418/225/GCA_000418225.1_Zizania_latifolia_v01
137	Brachypodium distachyon	ftp://ftp.ncbi.nlm.nih.gov/genomes/all/GCF/000/005/505/GCF_000005505.3_Brachypodium_distachyon_v3.0	SAMN02981254	PRJNA32607	GCA_000005505.4	Chromosome	271.299	46.4183	chromosome 1:NC_016131.3/CM000880.3; chromosome 2:NC_016132.3/CM000881.3; chromosome 3:NC_016133.3/CM000882.3; chromosome 4:NC_016134.3/CM000883.3; chromosome 5:NC_016135.3/CM000884.3; chloroplast Pltd:NC_011032.1/	ADDN03	15	2010-02-10T00:00:00Z	ftp://ftp.ncbi.nlm.nih.gov/genomes/all/GCA/000/005/505/GCA_000005505.4_Brachypodium_distachyon_v3.0
138	Dactylis glomerata	ftp://ftp.ncbi.nlm.nih.gov/genomes/all/GCA/002/892/645/GCA_002892645.1_ASM289264v1	SAMN06310890	PRJNA371686	GCA_002892645.1	Scaffold	839.915	45.4		MVYT01	1072009	2018-01-19T00:00:00Z	ftp://ftp.ncbi.nlm.nih.gov/genomes/all/GCA/002/892/645/GCA_002892645.1_ASM289264v1
139	Lolium perenne	ftp://ftp.ncbi.nlm.nih.gov/genomes/all/GCA/001/735/685/GCA_001735685.1_ASM173568v1	SAMN05714679	PRJNA340873	GCA_001735685.1	Scaffold	481.479	46.3		MEHO01	666180	2016-09-20T00:00:00Z	ftp://ftp.ncbi.nlm.nih.gov/genomes/all/GCA/001/735/685/GCA_001735685.1_ASM173568v1
140	Hordeum bulbosum	ftp://ftp.ncbi.nlm.nih.gov/genomes/all/GCA/900/070/015/GCA_900070015.1_Hordeum_bulbosum_assembly1	SAMEA3158488	PRJEB3403	GCA_900070015.1	Scaffold	1294.87	44.5		CBQS01	2883554	2017-02-21T00:00:00Z	ftp://ftp.ncbi.nlm.nih.gov/genomes/all/GCA/900/070/015/GCA_900070015.1_Hordeum_bulbosum_assembly1
141	Hordeum pubiflorum	ftp://ftp.ncbi.nlm.nih.gov/genomes/all/GCA/000/582/825/GCA_000582825.1_Hordeum_pubiflorum_assembly1	SAMEA3138951	PRJEB3404	GCA_000582825.1	Scaffold	1425.27	47.5		CBMN01	1818420	2013-08-21T00:00:00Z	ftp://ftp.ncbi.nlm.nih.gov/genomes/all/GCA/000/582/825/GCA_000582825.1_Hordeum_pubiflorum_assembly1
142	Hordeum vulgare	ftp://ftp.ncbi.nlm.nih.gov/genomes/all/GCA/004/114/815/GCA_004114815.1_Hulless_Barley_ass.V2	SAMN09914874	PRJNA487965	GCA_004114815.1	Scaffold	4006.12	44.3		SDOW01	1856	2019-01-28T00:00:00Z	ftp://ftp.ncbi.nlm.nih.gov/genomes/all/GCA/004/114/815/GCA_004114815.1_Hulless_Barley_ass.V2
143	Secale cereale	ftp://ftp.ncbi.nlm.nih.gov/genomes/all/GCA/900/079/665/GCA_900079665.1_Rye_Lo7_WGS_contigs	SAMEA3928734	PRJEB13501	GCA_900079665.1	Scaffold	1684.93	46.7		FKKI01	1581707	2016-11-23T00:00:00Z	ftp://ftp.ncbi.nlm.nih.gov/genomes/all/GCA/900/079/665/GCA_900079665.1_Rye_Lo7_WGS_contigs
144	Aegilops tauschii	ftp://ftp.ncbi.nlm.nih.gov/genomes/all/GCF/001/957/025/GCF_001957025.1_Aet_MR_1.0	SAMN05426520	PRJNA371621	GCA_001957025.1	Contig	4327.32	46.3679	chloroplast Pltd:NC_022133.1/	MCGU01	68538	2017-01-19T00:00:00Z	ftp://ftp.ncbi.nlm.nih.gov/genomes/all/GCF/001/957/025/GCF_001957025.1_Aet_MR_1.0
145	Triticum aestivum	ftp://ftp.ncbi.nlm.nih.gov/genomes/all/GCA/900/519/105/GCA_900519105.1_iwgsc_refseqv1.0	SAMEA4791365	PRJEB27788	GCA_900519105.1	Chromosome	14547.3	46.0544	chromosome 1A:LS992080.1; chromosome 1B:LS992081.1; chromosome 1D:LS992082.1; chromosome 2A:LS992083.1; chromosome 2B:LS992084.1; chromosome 2D:LS992085.1; chromosome 3A:LS992086.1; chromosome 3B:LS992087.1; chromosome 3D:LS992088.1; chromosome 4A:LS992089.1; chromosome 4B:LS992090.1; chromosome 4D:LS992091.1; chromosome 5A:LS992092.1; chromosome 5B:LS992093.1; chromosome 5D:LS992094.1; chromosom…		22	2018-08-19T00:00:00Z	ftp://ftp.ncbi.nlm.nih.gov/genomes/all/GCA/900/519/105/GCA_900519105.1_iwgsc_refseqv1.0
146	Triticum dicoccoides	ftp://ftp.ncbi.nlm.nih.gov/genomes/all/GCA/900/184/675/GCA_900184675.1_WEW_v1	SAMEA103910696	PRJEB19929	GCA_900184675.1	Chromosome	10495	45.9596	chromosome 1:LT859944.1; chromosome 2:LT859945.1; chromosome 3:LT859946.1; chromosome 4:LT859947.1; chromosome 5:LT859948.1; chromosome 6:LT859949.1; chromosome 7:LT859950.1; chromosome 8:LT859951.1; chromosome 9:LT859952.1; chromosome 10:LT859953.1; chromosome 11:LT859954.1; chromosome 12:LT859955.1; chromosome 13:LT859956.1; chromosome 14:LT859957.1	FXXJ01	149145	2017-06-09T00:00:00Z	ftp://ftp.ncbi.nlm.nih.gov/genomes/all/GCA/900/184/675/GCA_900184675.1_WEW_v1
147	Triticum urartu	ftp://ftp.ncbi.nlm.nih.gov/genomes/all/GCA/003/073/215/GCA_003073215.1_Tu2.0	SAMN05513572	PRJNA337888	GCA_003073215.1	Chromosome	4851.9	45.9397	chromosome 1:CM009793.1; chromosome 2:CM009794.1; chromosome 3:CM009795.1; chromosome 4:CM009796.1; chromosome 5:CM009797.1; chromosome 6:CM009798.1; chromosome 7:CM009799.1	MKGO01	10284	2018-04-26T00:00:00Z	ftp://ftp.ncbi.nlm.nih.gov/genomes/all/GCA/003/073/215/GCA_003073215.1_Tu2.0
148	Eleusine coracana	ftp://ftp.ncbi.nlm.nih.gov/genomes/all/GCA/002/180/455/GCA_002180455.1_ASM218045v1	SAMN04849255	PRJNA318349	GCA_002180455.1	Scaffold	1195.99	44.8		LXGH01	525627	2017-06-08T00:00:00Z
149	Eleusine indica	ftp://ftp.ncbi.nlm.nih.gov/genomes/all/GCA/003/369/855/GCA_003369855.1_ASM336985v1	SAMN09001275	PRJNA454287	GCA_003369855.1	Scaffold	492.27	40.8		QEPD01	24072	2018-08-10T00:00:00Z	ftp://ftp.ncbi.nlm.nih.gov/genomes/all/GCA/003/369/855/GCA_003369855.1_ASM336985v1
150	Oropetium thomaeum	ftp://ftp.ncbi.nlm.nih.gov/genomes/all/GCA/001/182/835/GCA_001182835.1_Oropetium_genomic_20141112	SAMN03765142	PRJNA286116	GCA_001182835.1	Contig	243.175	45.3		LFJQ01	625	2015-07-20T00:00:00Z	ftp://ftp.ncbi.nlm.nih.gov/genomes/all/GCA/001/182/835/GCA_001182835.1_Oropetium_genomic_20141112
151	Eragrostis curvula	ftp://ftp.ncbi.nlm.nih.gov/genomes/all/GCA/007/726/485/GCA_007726485.1_CERZOS_E.curvula1.0	SAMN10526598	PRJNA508722	GCA_007726485.1	Chromosome	603.072	45.6393	chromosome 1:CM017439.1; chromosome 2:CM017440.1; chromosome 3:CM017441.1; chromosome 4:CM017442.1; chromosome 5:CM017443.1; chromosome 6:CM017444.1; chromosome 7:CM017445.1	RWGY01	1143	2019-07-31T00:00:00Z	ftp://ftp.ncbi.nlm.nih.gov/genomes/all/GCA/007/726/485/GCA_007726485.1_CERZOS_E.curvula1.0
152	Eragrostis tef	ftp://ftp.ncbi.nlm.nih.gov/genomes/all/GCA/000/970/635/GCA_000970635.1_ASM97063v1	SAMN02872936	PRJNA253673	GCA_000970635.1	Scaffold	607.318	45.5		LAPY01	13883	2015-04-08T00:00:00Z	ftp://ftp.ncbi.nlm.nih.gov/genomes/all/GCA/000/970/635/GCA_000970635.1_ASM97063v1
153	Sporobolus alterniflorus	ftp://ftp.ncbi.nlm.nih.gov/genomes/all/GCA/008/808/055/GCA_008808055.1_ASM880805v1	SAMN09601648	PRJNA479677	GCA_008808055.1	Contig	365.573	45.3		VSTD01	52184	2019-10-03T00:00:00Z	ftp://ftp.ncbi.nlm.nih.gov/genomes/all/GCA/008/808/055/GCA_008808055.1_ASM880805v1
154	Zoysia japonica	ftp://ftp.ncbi.nlm.nih.gov/genomes/all/GCA/001/602/275/GCA_001602275.1_ASM160227v1	SAMD00041943	PRJDB4210	GCA_001602275.1	Scaffold	334.384	42.6		BCLF01	11786	2016-03-15T00:00:00Z	ftp://ftp.ncbi.nlm.nih.gov/genomes/all/GCA/001/602/275/GCA_001602275.1_ASM160227v1
155	Zoysia matrella	ftp://ftp.ncbi.nlm.nih.gov/genomes/all/GCA/001/602/295/GCA_001602295.1_ASM160229v1	SAMD00041944	PRJDB4210	GCA_001602295.1	Scaffold	563.439	43.3		BCLG01	13609	2016-03-15T00:00:00Z	ftp://ftp.ncbi.nlm.nih.gov/genomes/all/GCA/001/602/295/GCA_001602295.1_ASM160229v1
156	Zoysia pacifica	ftp://ftp.ncbi.nlm.nih.gov/genomes/all/GCA/001/602/315/GCA_001602315.1_ASM160231v1	SAMD00041945	PRJDB4210	GCA_001602315.1	Scaffold	397.01	43.2		BCLH01	11428	2016-03-15T00:00:00Z	ftp://ftp.ncbi.nlm.nih.gov/genomes/all/GCA/001/602/315/GCA_001602315.1_ASM160231v1
157	Coix aquatica	ftp://ftp.ncbi.nlm.nih.gov/genomes/all/GCA/009/725/075/GCA_009725075.1_ASM972507v1	SAMN10617848	PRJNA509097	GCA_009725075.1	Chromosome	1615.47	46.7564	chromosome 1:CM019138.1; chromosome 2:CM019139.1; chromosome 3:CM019140.1; chromosome 4:CM019141.1; chromosome 5:CM019142.1; chromosome 6:CM019143.1; chromosome 7:CM019144.1; chromosome 8:CM019145.1; chromosome 9:CM019146.1; chromosome 10:CM019147.1	RZMS01	2012	2019-12-02T00:00:00Z	ftp://ftp.ncbi.nlm.nih.gov/genomes/all/GCA/009/725/075/GCA_009725075.1_ASM972507v1
158	Miscanthus sacchariflorus	ftp://ftp.ncbi.nlm.nih.gov/genomes/all/GCA/002/993/905/GCA_002993905.1_Msac_v3	SAMN08580354	PRJNA435476	GCA_002993905.1	Chromosome	2074.92	46.4829	chromosome 1:CM009591.1; chromosome 2:CM009592.1; chromosome 3:CM009593.1; chromosome 4:CM009594.1; chromosome 5:CM009595.1; chromosome 6:CM009596.1; chromosome 7:CM009597.1; chromosome 8:CM009598.1; chromosome 9:CM009599.1; chromosome 10:CM009600.1; chromosome 11:CM009601.1; chromosome 12:CM009602.1; chromosome 13:CM009603.1; chromosome 14:CM009604.1; chromosome 15:CM009605.1; chromosome 16:CM00…	PUID01	137916	2018-03-09T00:00:00Z	ftp://ftp.ncbi.nlm.nih.gov/genomes/all/GCA/002/993/905/GCA_002993905.1_Msac_v3
159	Saccharum hybrid cultivar	ftp://ftp.ncbi.nlm.nih.gov/genomes/all/GCA/900/465/005/GCA_900465005.1_MTP	SAMEA4681430	PRJEB26915	GCA_900465005.1	Scaffold	530.66	45.1		UBIK01	5708	2018-06-18T00:00:00Z	ftp://ftp.ncbi.nlm.nih.gov/genomes/all/GCA/900/465/005/GCA_900465005.1_MTP
160	Saccharum spontaneum	ftp://ftp.ncbi.nlm.nih.gov/genomes/all/GCA/003/544/955/GCA_003544955.1_Sspon.HiC_chr_asm	SAMN09753102	PRJNA483885	GCA_003544955.1	Chromosome	3133.29	44.937	chromosome 1A:CM010683.1; chromosome 1B:CM010684.1; chromosome 1C:CM010685.1; chromosome 1D:CM010686.1; chromosome 2A:CM010687.1; chromosome 2B:CM010688.1; chromosome 2C:CM010689.1; chromosome 2D:CM010690.1; chromosome 3A:CM010691.1; chromosome 3B:CM010692.1; chromosome 3C:CM010693.1; chromosome 3D:CM010694.1; chromosome 4A:CM010695.1; chromosome 4B:CM010696.1; chromosome 4C:CM010697.1; chromosom…	QVOL01	15303	2018-09-10T00:00:00Z	ftp://ftp.ncbi.nlm.nih.gov/genomes/all/GCA/003/544/955/GCA_003544955.1_Sspon.HiC_chr_asm
161	Sorghum bicolor	ftp://ftp.ncbi.nlm.nih.gov/genomes/all/GCF/000/003/195/GCF_000003195.3_Sorghum_bicolor_NCBIv3	SAMN02953738	PRJNA13876	GCA_000003195.3	Chromosome	709.345	44.1611	chromosome 1:NC_012870.2/CM000760.3; chromosome 2:NC_012871.2/CM000761.3; chromosome 3:NC_012872.2/CM000762.3; chromosome 4:NC_012873.2/CM000763.3; chromosome 5:NC_012874.2/CM000764.3; chromosome 6:NC_012875.2/CM000765.3; chromosome 7:NC_012876.2/CM000766.3; chromosome 8:NC_012877.2/CM000767.3; chromosome 9:NC_012878.2/CM000768.3; chromosome 10:NC_012879.2/CM000769.3; mitochondrion MT:NC_008360.1…	ABXC03	869	2009-05-22T00:00:00Z	ftp://ftp.ncbi.nlm.nih.gov/genomes/all/GCA/000/003/195/GCA_000003195.3_Sorghum_bicolor_NCBIv3
162	Zea mays	ftp://ftp.ncbi.nlm.nih.gov/genomes/all/GCF/000/005/005/GCF_000005005.2_B73_RefGen_v4	SAMN04296295	PRJNA10769	GCA_000005005.6	Chromosome	2135.08	46.9109	chromosome 1:NC_024459.2/CM007647.1; chromosome 2:NC_024460.2/CM007648.1; chromosome 3:NC_024461.2/CM007649.1; chromosome 4:NC_024462.2/CM000780.4; chromosome 5:NC_024463.2/CM000781.4; chromosome 6:NC_024464.2/CM000782.4; chromosome 7:NC_024465.2/CM007650.1; chromosome 8:NC_024466.2/CM000784.4; chromosome 9:NC_024467.2/CM000785.4; chromosome 10:NC_024468.2/CM000786.4; mitochondrion MT:NC_007982.1…	LPUQ01	598	2010-01-29T00:00:00Z	ftp://ftp.ncbi.nlm.nih.gov/genomes/all/GCA/000/005/005/GCA_000005005.6_B73_RefGen_v4
163	Alloteropsis semialata	ftp://ftp.ncbi.nlm.nih.gov/genomes/all/GCA/004/135/705/GCA_004135705.1_ASEM_AUS1_V1.0	SAMN09668083	PRJNA481434	GCA_004135705.1	Chromosome	747.772	46.2887	chromosome 1:CM014270.1; chromosome 2:CM014271.1; chromosome 3:CM014272.1; chromosome 4:CM014273.1; chromosome 5:CM014274.1; chromosome 6:CM014275.1; chromosome 7:CM014276.1; chromosome 8:CM014277.1; chromosome 9:CM014278.1; chloroplast Pltd:CM014279.1	QPGU01	688	2019-02-04T00:00:00Z	ftp://ftp.ncbi.nlm.nih.gov/genomes/all/GCA/004/135/705/GCA_004135705.1_ASEM_AUS1_V1.0
164	Echinochloa crus-galli	ftp://ftp.ncbi.nlm.nih.gov/genomes/all/GCA/900/205/405/GCA_900205405.1_ASM90020540v1	SAMEA104207156	PRJEB22102	GCA_900205405.1	Scaffold	1486.61	38.9		OAMR01	4534	2017-10-23T00:00:00Z	ftp://ftp.ncbi.nlm.nih.gov/genomes/all/GCA/900/205/405/GCA_900205405.1_ASM90020540v1
165	Cenchrus americanus	ftp://ftp.ncbi.nlm.nih.gov/genomes/all/GCA/002/174/835/GCA_002174835.2_ASM217483v2	SAMN04124419	PRJNA294988	GCA_002174835.2	Chromosome	1816.95	48.0881	chromosome 1:CM007982.2; chromosome 2:CM007983.2; chromosome 3:CM007984.2; chromosome 4:CM007985.2; chromosome 5:CM007986.2; chromosome 6:CM007987.2; chromosome 7:CM007988.2	LKME02	52033	2017-06-06T00:00:00Z	ftp://ftp.ncbi.nlm.nih.gov/genomes/all/GCA/002/174/835/GCA_002174835.2_ASM217483v2
166	Setaria italica	ftp://ftp.ncbi.nlm.nih.gov/genomes/all/GCF/000/263/155/GCF_000263155.2_Setaria_italica_v2.0	SAMN02981383	PRJNA32913	GCA_000263155.2	Chromosome	405.868	46.1715	chromosome I:NC_028450.1/CM003528.1; chromosome II:NC_028451.1/CM003529.1; chromosome III:NC_028452.1/CM003530.1; chromosome IV:NC_028453.1/CM003531.1; chromosome V:NC_028454.1/CM003532.1; chromosome VI:NC_028455.1/CM003533.1; chromosome VII:NC_028456.1/CM003534.1; chromosome VIII:NC_028457.1/CM003535.1; chromosome IX:NC_028458.1/CM003536.1; plastid Pltd:NC_022850.1/	AGNK02	337	2012-05-11T00:00:00Z	ftp://ftp.ncbi.nlm.nih.gov/genomes/all/GCA/000/263/155/GCA_000263155.2_Setaria_italica_v2.0
167	Setaria viridis	ftp://ftp.ncbi.nlm.nih.gov/genomes/all/GCA/005/286/985/GCA_005286985.1_Setaria_viridis_v2.0	SAMN05660902	PRJNA265547	GCA_005286985.1	Chromosome	395.732	46.1894	chromosome 1:CM016552.1; chromosome 2:CM016553.1; chromosome 3:CM016554.1; chromosome 4:CM016555.1; chromosome 5:CM016556.1; chromosome 6:CM016557.1; chromosome 7:CM016558.1; chromosome 8:CM016559.1; chromosome 9:CM016560.1	SNSE01	75	2019-05-07T00:00:00Z	ftp://ftp.ncbi.nlm.nih.gov/genomes/all/GCA/005/286/985/GCA_005286985.1_Setaria_viridis_v2.0
168	Dichanthelium oligosanthes	ftp://ftp.ncbi.nlm.nih.gov/genomes/all/GCA/001/633/215/GCA_001633215.2_ASM163321v2	SAMN04335715	PRJNA305932	GCA_001633215.2	Scaffold	589.166	47.5		LWDX02	17436	2016-04-28T00:00:00Z	ftp://ftp.ncbi.nlm.nih.gov/genomes/all/GCA/001/633/215/GCA_001633215.2_ASM163321v2
169	Urochloa ruziziensis	ftp://ftp.ncbi.nlm.nih.gov/genomes/all/GCA/003/016/355/GCA_003016355.1_Bruz	SAMN08660983	PRJNA437375	GCA_003016355.1	Scaffold	732.531	40.8		PVZT01	102577	2018-03-21T00:00:00Z	ftp://ftp.ncbi.nlm.nih.gov/genomes/all/GCA/003/016/355/GCA_003016355.1_Bruz
170	Panicum miliaceum	ftp://ftp.ncbi.nlm.nih.gov/genomes/all/GCA/002/895/445/GCA_002895445.2_ASM289544v2	SAMN08335224	PRJNA429322	GCA_002895445.2	Chromosome	848.352	46.8382	chromosome 1:CM010235.1; chromosome 2:CM010236.1; chromosome 3:CM010237.1; chromosome 4:CM010238.1; chromosome 5:CM010239.1; chromosome 6:CM010240.1; chromosome 7:CM010241.1; chromosome 8:CM010242.1; chromosome 9:CM010243.1; chromosome 10:CM010244.1; chromosome 11:CM010245.1; chromosome 12:CM010246.1; chromosome 13:CM010247.1; chromosome 14:CM010248.1; chromosome 15:CM010249.1; chromosome 16:CM01…	PPDP02	466	2018-01-23T00:00:00Z	ftp://ftp.ncbi.nlm.nih.gov/genomes/all/GCA/002/895/445/GCA_002895445.2_ASM289544v2
171	Panicum hallii	ftp://ftp.ncbi.nlm.nih.gov/genomes/all/GCF/002/211/085/GCF_002211085.1_PHallii_v3.1	SAMN03003198	PRJNA482138	GCA_002211085.2	Chromosome	535.889	46.9052	chromosome 1:NC_038042.1/CM008046.2; chromosome 2:NC_038043.1/CM008047.2; chromosome 3:NC_038044.1/CM008048.2; chromosome 4:NC_038045.1/CM008049.2; chromosome 5:NC_038046.1/CM008050.2; chromosome 6:NC_038047.1/CM008051.2; chromosome 7:NC_038048.1/CM008052.2; chromosome 8:NC_038049.1/CM008053.2; chromosome 9:NC_038050.1/CM008054.2	NCQW02	1027	2017-06-19T00:00:00Z	ftp://ftp.ncbi.nlm.nih.gov/genomes/all/GCA/002/211/085/GCA_002211085.2_PHallii_v3.1
172	Eichhornia paniculata	ftp://ftp.ncbi.nlm.nih.gov/genomes/all/GCA/001/647/135/GCA_001647135.1_ASM164713v1	SAMN04450015	PRJNA310303	GCA_001647135.1	Scaffold	571.388	33.2		LTAE01	40286	2016-05-02T00:00:00Z	ftp://ftp.ncbi.nlm.nih.gov/genomes/all/GCA/001/647/135/GCA_001647135.1_ASM164713v1
173	Ensete ventricosum	ftp://ftp.ncbi.nlm.nih.gov/genomes/all/GCA/000/818/735/GCA_000818735.3_Bedadeti_annotated	SAMN02854351	PRJNA252658	GCA_000818735.3	Scaffold	451.279	38.9		JTFG03	45742	2015-01-09T00:00:00Z	ftp://ftp.ncbi.nlm.nih.gov/genomes/all/GCA/000/818/735/GCA_000818735.3_Bedadeti_annotated
174	Musa acuminata	ftp://ftp.ncbi.nlm.nih.gov/genomes/all/GCF/000/313/855/GCF_000313855.2_ASM31385v2	SAMEA2272344	PRJEA82777	GCA_000313855.2	Chromosome	472.231	40.729	chromosome 1:NC_025202.1/HE813975.1; chromosome 2:NC_025203.1/HE813976.1; chromosome 3:NC_025204.1/HE813977.1; chromosome 4:NC_025205.1/HE813978.1; chromosome 5:NC_025206.1/HE813979.1; chromosome 6:NC_025207.1/HE813980.1; chromosome 7:NC_025208.1/HE813981.1; chromosome 8:NC_025209.1/HE813982.1; chromosome 9:NC_025210.1/HE813983.1; chromosome 10:NC_025211.1/HE813984.1; chromosome 11:NC_025212.1/HE…	CAIC01	7512	2012-08-09T00:00:00Z	ftp://ftp.ncbi.nlm.nih.gov/genomes/all/GCF/000/313/855/GCF_000313855.2_ASM31385v2
175	Musa balbisiana	ftp://ftp.ncbi.nlm.nih.gov/genomes/all/GCA/004/837/865/GCA_004837865.1_BananaB_V1	SAMN08469760	PRJNA432894	GCA_004837865.1	Chromosome	492.775	37.9868	chromosome 1:CM017188.1; chromosome 2:CM017189.1; chromosome 3:CM017190.1; chromosome 4:CM017191.1; chromosome 5:CM017192.1; chromosome 6:CM017193.1; chromosome 7:CM017194.1; chromosome 8:CM017195.1; chromosome 9:CM017196.1; chromosome 10:CM017197.1; chromosome 11:CM017198.1	PYDT01	2590	2019-04-24T00:00:00Z	ftp://ftp.ncbi.nlm.nih.gov/genomes/all/GCA/004/837/865/GCA_004837865.1_BananaB_V1
176	Musa itinerans	ftp://ftp.ncbi.nlm.nih.gov/genomes/all/GCA/001/649/415/GCA_001649415.1_ASM164941v1	SAMN04505257	PRJNA312694	GCA_001649415.1	Scaffold	455.349	35.4		LVTN01	28415	2016-05-21T00:00:00Z	ftp://ftp.ncbi.nlm.nih.gov/genomes/all/GCA/001/649/415/GCA_001649415.1_ASM164941v1
177	Musa schizocarpa	ftp://ftp.ncbi.nlm.nih.gov/genomes/all/GCA/900/464/855/GCA_900464855.1_ASM90046485v1	SAMEA4655287	PRJEB26661	GCA_900464855.1	Scaffold	525.283	39		UBIG01	194	2018-06-18T00:00:00Z	ftp://ftp.ncbi.nlm.nih.gov/genomes/all/GCA/900/464/855/GCA_900464855.1_ASM90046485v1
178	Berberis thunbergii	ftp://ftp.ncbi.nlm.nih.gov/genomes/all/GCA/003/290/165/GCA_003290165.1_B.thun_GenomeAssembly_v1	SAMN09515102	PRJNA478403	GCA_003290165.1	Contig	2240.74	0		QNQO01	11815	2018-07-06T00:00:00Z	ftp://ftp.ncbi.nlm.nih.gov/genomes/all/GCA/003/290/165/GCA_003290165.1_B.thun_GenomeAssembly_v1
179	Eschscholzia californica	ftp://ftp.ncbi.nlm.nih.gov/genomes/all/GCA/002/897/215/GCA_002897215.1_ECA_r1.0	SAMD00093367	PRJDB6318	GCA_002897215.1	Scaffold	489.065	33.1		BEHA01	53253	2017-12-28T00:00:00Z
180	Macleaya cordata	ftp://ftp.ncbi.nlm.nih.gov/genomes/all/GCA/002/174/775/GCA_002174775.1_MC_HNAU_1.0	SAMN06209354	PRJNA359127	GCA_002174775.1	Scaffold	377.834	32.9		MVGT01	4547	2017-06-07T00:00:00Z	ftp://ftp.ncbi.nlm.nih.gov/genomes/all/GCA/002/174/775/GCA_002174775.1_MC_HNAU_1.0
181	Papaver somniferum	ftp://ftp.ncbi.nlm.nih.gov/genomes/all/GCF/003/573/695/GCF_003573695.1_ASM357369v1	SAMN08604995	PRJNA492326	GCA_003573695.1	Chromosome	2715.53	37.3014	chromosome 1:NC_039358.1/CM010715.1; chromosome 2:NC_039359.1/CM010716.1; chromosome 3:NC_039360.1/CM010717.1; chromosome 4:NC_039361.1/CM010718.1; chromosome 5:NC_039362.1/CM010719.1; chromosome 6:NC_039363.1/CM010720.1; chromosome 7:NC_039364.1/CM010721.1; chromosome 8:NC_039365.1/CM010722.1; chromosome 9:NC_039366.1/CM010723.1; chromosome 10:NC_039367.1/CM010724.1; chromosome 11:NC_039368.1/CM…	PUWZ01	34381	2018-09-10T00:00:00Z	ftp://ftp.ncbi.nlm.nih.gov/genomes/all/GCA/003/573/695/GCA_003573695.1_ASM357369v1
182	Aquilegia coerulea	ftp://ftp.ncbi.nlm.nih.gov/genomes/all/GCA/002/738/505/GCA_002738505.1_Aquilegia_coerulea_v1	SAMN01041930	PRJNA33681	GCA_002738505.1	Scaffold	301.98	37.3		NXFA01	970	2017-10-31T00:00:00Z	ftp://ftp.ncbi.nlm.nih.gov/genomes/all/GCA/002/738/505/GCA_002738505.1_Aquilegia_coerulea_v1
183	Nelumbo nucifera	ftp://ftp.ncbi.nlm.nih.gov/genomes/all/GCF/000/365/185/GCF_000365185.1_Chinese_Lotus_1.1	SAMN02054413	PRJNA168000	GCA_000365185.2	Scaffold	804.648	39.4997	chloroplast Chloroplast:NC_025339.1/KF009944.1	AQOG01	3603	2013-04-15T00:00:00Z	ftp://ftp.ncbi.nlm.nih.gov/genomes/all/GCA/000/365/185/GCA_000365185.2_Chinese_Lotus_1.1
184	Macadamia integrifolia	ftp://ftp.ncbi.nlm.nih.gov/genomes/all/GCA/900/631/585/GCA_900631585.1_Macadamia_Integrifolia_v2	SAMEA5145324	PRJEB13765	GCA_900631585.1	Scaffold	744.636	38.5		UZVR01	4098	2018-12-07T00:00:00Z	ftp://ftp.ncbi.nlm.nih.gov/genomes/all/GCA/900/631/585/GCA_900631585.1_Macadamia_Integrifolia_v2
185	Kalanchoe fedtschenkoi	ftp://ftp.ncbi.nlm.nih.gov/genomes/all/GCA/002/312/845/GCA_002312845.1_K_fedtschenkoi_M2_v1	SAMN07509503	PRJNA397334	GCA_002312845.1	Scaffold	256.351	34.5		NQLW01	1324	2017-09-19T00:00:00Z	ftp://ftp.ncbi.nlm.nih.gov/genomes/all/GCA/002/312/845/GCA_002312845.1_K_fedtschenkoi_M2_v1
186	Sedum album	ftp://ftp.ncbi.nlm.nih.gov/genomes/all/GCA/006/409/495/GCA_006409495.1_Sedum_album_v3	SAMN09943627	PRJNA488791	GCA_006409495.1	Contig	302.251	38		QZGG01	6038	2019-06-24T00:00:00Z	ftp://ftp.ncbi.nlm.nih.gov/genomes/all/GCA/006/409/495/GCA_006409495.1_Sedum_album_v3
187	Rhodoleia championii	ftp://ftp.ncbi.nlm.nih.gov/genomes/all/GCA/008/932/045/GCA_008932045.1_ASM893204v1	SAMN11265005	PRJNA529342	GCA_008932045.1	Contig	105.726	36.6		VMOD01	278658	2019-10-09T00:00:00Z	ftp://ftp.ncbi.nlm.nih.gov/genomes/all/GCA/008/932/045/GCA_008932045.1_ASM893204v1
188	Cissus quadrangularis	ftp://ftp.ncbi.nlm.nih.gov/genomes/all/GCA/002/878/655/GCA_002878655.1_ASM287865v1	SAMN03223842	PRJNA268706	GCA_002878655.1	Scaffold	281.704	27.3		LLYR01	125206	2018-01-12T00:00:00Z	ftp://ftp.ncbi.nlm.nih.gov/genomes/all/GCA/002/878/655/GCA_002878655.1_ASM287865v1
189	Vitis aestivalis	ftp://ftp.ncbi.nlm.nih.gov/genomes/all/GCA/001/562/795/GCA_001562795.1_VitisNorton_MSU1.0	SAMN04276630	PRJNA302606	GCA_001562795.1	Contig	432.755	33.8		LOML01	756125	2016-02-17T00:00:00Z	ftp://ftp.ncbi.nlm.nih.gov/genomes/all/GCA/001/562/795/GCA_001562795.1_VitisNorton_MSU1.0
190	Vitis cinerea x Vitis riparia	ftp://ftp.ncbi.nlm.nih.gov/genomes/all/GCA/001/282/645/GCA_001282645.1_BoeWGS1.0	SAMEA2532534	PRJEB5934	GCA_001282645.1	Scaffold	539.624	34.2		CCJE01	210444	2015-06-30T00:00:00Z	ftp://ftp.ncbi.nlm.nih.gov/genomes/all/GCA/001/282/645/GCA_001282645.1_BoeWGS1.0
191	Vitis riparia	ftp://ftp.ncbi.nlm.nih.gov/genomes/all/GCA/004/353/265/GCA_004353265.1_EGFV_Vit.rip_1.0	SAMN10662253	PRJNA512170	GCA_004353265.1	Chromosome	500.106	34.4296	chromosome 1:CM014904.1; chromosome 2:CM014905.1; chromosome 3:CM014906.1; chromosome 4:CM014907.1; chromosome 5:CM014908.1; chromosome 6:CM014909.1; chromosome 7:CM014910.1; chromosome 8:CM014911.1; chromosome 9:CM014912.1; chromosome 10:CM014913.1; chromosome 11:CM014914.1; chromosome 12:CM014915.1; chromosome 13:CM014916.1; chromosome 14:CM014917.1; chromosome 15:CM014918.1; chromosome 16:CM01…	SJAQ01	174	2019-03-15T00:00:00Z	ftp://ftp.ncbi.nlm.nih.gov/genomes/all/GCA/004/353/265/GCA_004353265.1_EGFV_Vit.rip_1.0
192	Vitis riparia x Vitis cinerea	ftp://ftp.ncbi.nlm.nih.gov/genomes/all/GCA/900/538/005/GCA_900538005.1_BoeWGS1.0	SAMEA4881065	PRJEB28084	GCA_900538005.1	Scaffold	618.346	33.5		UNRP01	238193	2019-10-30T00:00:00Z	ftp://ftp.ncbi.nlm.nih.gov/genomes/all/GCA/900/538/005/GCA_900538005.1_BoeWGS1.0
193	Vitis vinifera	ftp://ftp.ncbi.nlm.nih.gov/genomes/all/GCF/000/003/745/GCF_000003745.3_12X	SAMEA2272750	PRJEA18785	GCA_000003745.2	Chromosome	486.197	35.0336	chromosome 1:NC_012007.3/FN597015.1; chromosome 2:NC_012008.3/FN597017.1; chromosome 3:NC_012009.3/FN597018.1; chromosome 4:NC_012010.3/FN597020.1; chromosome 5:NC_012011.3/FN597022.1; chromosome 6:NC_012012.3/FN597024.1; chromosome 7:NC_012013.3/FN597025.1; chromosome 8:NC_012014.3/FN597027.1; chromosome 9:NC_012015.3/FN597028.1; chromosome 10:NC_012016.3/FN597030.1; chromosome 11:NC_012017.3/FN…	CAAP03	2061	2007-02-13T00:00:00Z	ftp://ftp.ncbi.nlm.nih.gov/genomes/all/GCA/000/003/745/GCA_000003745.2_12X
194	Vitis x labruscana x Vitis vinifera	ftp://ftp.ncbi.nlm.nih.gov/genomes/all/GCA/008/326/845/GCA_008326845.1_VSMuph_r1.0	SAMD00180765	PRJDB8610	GCA_008326845.1	Scaffold	490.143	34.1		BKBX01	8696	2019-08-21T21:03:00Z	ftp://ftp.ncbi.nlm.nih.gov/genomes/all/GCA/008/326/845/GCA_008326845.1_VSMuph_r1.0
195	Aristotelia chilensis	ftp://ftp.ncbi.nlm.nih.gov/genomes/all/GCA/008/921/755/GCA_008921755.1_MAQUI01	SAMN11874982	PRJNA544858	GCA_008921755.1	Scaffold	96.3544	35.1		VEXP01	42602	2019-10-08T00:00:00Z	ftp://ftp.ncbi.nlm.nih.gov/genomes/all/GCA/008/921/755/GCA_008921755.1_MAQUI01
196	Cephalotus follicularis	ftp://ftp.ncbi.nlm.nih.gov/genomes/all/GCA/001/972/305/GCA_001972305.1_Cfol_1.0	SAMD00045316	PRJDB4484	GCA_001972305.1	Scaffold	1614.52	38.9		BDDD01	16307	2017-01-11T21:19:00Z	ftp://ftp.ncbi.nlm.nih.gov/genomes/all/GCA/001/972/305/GCA_001972305.1_Cfol_1.0
197	Populus simonii	ftp://ftp.ncbi.nlm.nih.gov/genomes/all/GCA/007/827/005/GCA_007827005.2_Populus_simonii_2.0	SAMN11934934	PRJNA545814	GCA_007827005.2	Chromosome	441.407	33.6576	chromosome 1:CM017464.2; chromosome 2:CM017465.2; chromosome 3:CM017466.2; chromosome 4:CM017467.2; chromosome 5:CM017468.2; chromosome 6:CM017469.2; chromosome 7:CM017470.2; chromosome 8:CM017471.2; chromosome 9:CM017472.2; chromosome 10:CM017473.2; chromosome 11:CM017474.2; chromosome 12:CM017475.2; chromosome 13:CM017476.2; chromosome 14:CM017477.2; chromosome 15:CM017478.2; chromosome 16:CM01…	VJNQ02	686	2019-07-30T00:00:00Z	ftp://ftp.ncbi.nlm.nih.gov/genomes/all/GCA/007/827/005/GCA_007827005.2_Populus_simonii_2.0
198	Salix brachista	ftp://ftp.ncbi.nlm.nih.gov/genomes/all/GCA/009/078/335/GCA_009078335.1_ASM907833v1	SAMN09235684	PRJNA472210	GCA_009078335.1	Chromosome	339.588	34.1556	chromosome 1:CM018572.1; chromosome 2:CM018573.1; chromosome 3:CM018574.1; chromosome 4:CM018575.1; chromosome 5:CM018576.1; chromosome 6:CM018577.1; chromosome 7:CM018578.1; chromosome 8:CM018579.1; chromosome 9:CM018580.1; chromosome 10:CM018581.1; chromosome 11:CM018582.1; chromosome 12:CM018583.1; chromosome 13:CM018584.1; chromosome 14:CM018585.1; chromosome 15:CM018586.1; chromosome 16:CM01…	VDCV01	30	2019-10-15T00:00:00Z	ftp://ftp.ncbi.nlm.nih.gov/genomes/all/GCA/009/078/335/GCA_009078335.1_ASM907833v1
199	Caryocar brasiliense	ftp://ftp.ncbi.nlm.nih.gov/genomes/all/GCA/004/918/865/GCA_004918865.1_Cbr_v1.0	SAMN11174932	PRJNA528117	GCA_004918865.1	Scaffold	212.173	34		STGP01	55248	2019-04-26T00:00:00Z	ftp://ftp.ncbi.nlm.nih.gov/genomes/all/GCA/004/918/865/GCA_004918865.1_Cbr_v1.0
200	Ricinus communis	ftp://ftp.ncbi.nlm.nih.gov/genomes/all/GCF/000/151/685/GCF_000151685.1_JCVI_RCG_1.1	SAMN02953659	PRJNA16585	GCA_000151685.2	Scaffold	350.622	34.4006	chloroplast Pltd:NC_016736.1/JF937588.1	AASG02	25763	2006-07-18T00:00:00Z	ftp://ftp.ncbi.nlm.nih.gov/genomes/all/GCA/000/151/685/GCA_000151685.2_JCVI_RCG_1.1
201	Jatropha curcas	ftp://ftp.ncbi.nlm.nih.gov/genomes/all/GCF/000/696/525/GCF_000696525.1_JatCur_1.0	SAMN02799222	PRJNA63485	GCA_000696525.1	Scaffold	318.527	35.8997	chloroplast Pltd:NC_012224.1/	AFEW01	6024	2014-05-23T00:00:00Z	ftp://ftp.ncbi.nlm.nih.gov/genomes/all/GCA/000/696/525/GCA_000696525.1_JatCur_1.0
202	Manihot esculenta	ftp://ftp.ncbi.nlm.nih.gov/genomes/all/GCF/001/659/605/GCF_001659605.1_Manihot_esculenta_v6	SAMN04116956	PRJNA394209	GCA_001659605.1	Chromosome	582.279	38.0059	chromosome LG1:NC_035161.1/CM004387.1; chromosome LG2:NC_035162.1/CM004388.1; chromosome LG3:NC_035163.1/CM004389.1; chromosome LG4:NC_035164.1/CM004390.1; chromosome LG5:NC_035165.1/CM004391.1; chromosome LG6:NC_035166.1/CM004392.1; chromosome LG7:NC_035167.1/CM004393.1; chromosome LG8:NC_035168.1/CM004394.1; chromosome LG9:NC_035169.1/CM004395.1; chromosome LG10:NC_035170.1/CM004396.1; chromoso…	LTYI01	2020	2016-06-07T00:00:00Z	ftp://ftp.ncbi.nlm.nih.gov/genomes/all/GCA/001/659/605/GCA_001659605.1_Manihot_esculenta_v6
203	Hevea brasiliensis	ftp://ftp.ncbi.nlm.nih.gov/genomes/all/GCF/001/654/055/GCF_001654055.1_ASM165405v1	SAMN04451765	PRJNA394253	GCA_001654055.1	Scaffold	1373.53	35.7	chloroplast Pltd:NC_015308.1/	LVXX01	7453	2016-06-01T00:00:00Z	ftp://ftp.ncbi.nlm.nih.gov/genomes/all/GCA/001/654/055/GCA_001654055.1_ASM165405v1
204	Euphorbia esula	ftp://ftp.ncbi.nlm.nih.gov/genomes/all/GCA/002/919/075/GCA_002919075.1_ASM291907v1	SAMN08132862	PRJNA413193	GCA_002919075.1	Scaffold	1124.89	34.1		PJAD01	1633094	2018-02-06T00:00:00Z	ftp://ftp.ncbi.nlm.nih.gov/genomes/all/GCA/002/919/075/GCA_002919075.1_ASM291907v1
205	Linum usitatissimum	ftp://ftp.ncbi.nlm.nih.gov/genomes/all/GCA/000/224/295/GCA_000224295.2_ASM22429v2	SAMN00627887	PRJNA68161	GCA_000224295.2	Chromosome	316.167	40.8876	chromosome Lu1:CP027619.1; chromosome Lu10:CP027620.1; chromosome Lu11:CP027621.1; chromosome Lu12:CP027622.1; chromosome Lu13:CP027623.1; chromosome Lu14:CP027624.1; chromosome Lu15:CP027625.1; chromosome Lu2:CP027626.1; chromosome Lu3:CP027627.1; chromosome Lu4:CP027628.1; chromosome Lu5:CP027629.1; chromosome Lu6:CP027630.1; chromosome Lu7:CP027631.1; chromosome Lu8:CP027632.1; chromosome Lu9:…		15	2018-03-09T00:00:00Z	ftp://ftp.ncbi.nlm.nih.gov/genomes/all/GCA/000/224/295/GCA_000224295.2_ASM22429v2
206	Passiflora edulis	ftp://ftp.ncbi.nlm.nih.gov/genomes/all/GCA/002/156/105/GCA_002156105.1_ASM215610v1	SAMN06298772	PRJNA371406	GCA_002156105.1	Scaffold	165.657	38.6		MUZT01	234012	2017-05-22T00:00:00Z	ftp://ftp.ncbi.nlm.nih.gov/genomes/all/GCA/002/156/105/GCA_002156105.1_ASM215610v1
207	Rhizophora apiculata	ftp://ftp.ncbi.nlm.nih.gov/genomes/all/GCA/900/174/605/GCA_900174605.1_Rap_scaffold_v2	SAMEA103941919	PRJEB8423	GCA_900174605.1	Scaffold	232.055	35		FWPW01	142	2017-09-19T00:00:00Z	ftp://ftp.ncbi.nlm.nih.gov/genomes/all/GCA/900/174/605/GCA_900174605.1_Rap_scaffold_v2
208	Populus alba	ftp://ftp.ncbi.nlm.nih.gov/genomes/all/GCA/005/239/225/GCA_005239225.1_ASM523922v1	SAMN10068022	PRJNA491245	GCA_005239225.1	Contig	416.961	33.8		RCHU01	1287	2019-05-08T00:00:00Z	ftp://ftp.ncbi.nlm.nih.gov/genomes/all/GCA/005/239/225/GCA_005239225.1_ASM523922v1
209	Populus euphratica	ftp://ftp.ncbi.nlm.nih.gov/genomes/all/GCF/000/495/115/GCF_000495115.1_PopEup_1.0	SAMN02981499	PRJNA268063	GCA_000495115.1	Scaffold	496.033	32.8012	chloroplast Pltd:NC_024747.1/	AOFL01	9615	2013-11-01T00:00:00Z	ftp://ftp.ncbi.nlm.nih.gov/genomes/all/GCA/000/495/115/GCA_000495115.1_PopEup_1.0
210	Populus trichocarpa	ftp://ftp.ncbi.nlm.nih.gov/genomes/all/GCF/000/002/775/GCF_000002775.4_Pop_tri_v3	SAMN02953657	PRJNA10772	GCA_000002775.3	Chromosome	434.29	34.1468	chromosome 1:NC_037285.1/CM009290.1; chromosome 2:NC_037286.1/CM009291.1; chromosome 3:NC_037287.1/CM009292.1; chromosome 4:NC_037288.1/CM009293.1; chromosome 5:NC_037289.1/CM009294.1; chromosome 6:NC_037290.1/CM009295.1; chromosome 7:NC_037291.1/CM009296.1; chromosome 8:NC_037292.1/CM009297.1; chromosome 9:NC_037293.1/CM009298.1; chromosome 10:NC_037294.1/CM009299.1; chromosome 11:NC_037295.1/CM…	AARH03	1694	2006-09-14T00:00:00Z	ftp://ftp.ncbi.nlm.nih.gov/genomes/all/GCA/000/002/775/GCA_000002775.3_Pop_tri_v3
211	Viola pubescens	ftp://ftp.ncbi.nlm.nih.gov/genomes/all/GCA/002/752/925/GCA_002752925.1_violet_k79_twolib_greater_than_500bp	SAMN06620010	PRJNA379317	GCA_002752925.1	Scaffold	318.366	37.7		NBIL01	157716	2017-11-06T00:00:00Z
212	Glycine tomentella	ftp://ftp.ncbi.nlm.nih.gov/genomes/all/GCA/007/407/185/GCA_007407185.1_G_tom_03Nov2016_Ncxrf_filtered	SAMN08683511	PRJNA437717	GCA_007407185.1	Scaffold	1694.09	33.4		PYAF01	6353	2019-07-24T00:00:00Z	ftp://ftp.ncbi.nlm.nih.gov/genomes/all/GCA/007/407/185/GCA_007407185.1_G_tom_03Nov2016_Ncxrf_filtered
213	Carpinus fangiana	ftp://ftp.ncbi.nlm.nih.gov/genomes/all/GCA/006/937/295/GCA_006937295.1_ASM693729v1	SAMN11997873	PRJNA548027	GCA_006937295.1	Chromosome	381.949	37.2649	chromosome 1:CM017321.1; chromosome 2:CM017322.1; chromosome 3:CM017323.1; chromosome 4:CM017324.1; chromosome 5:CM017325.1; chromosome 6:CM017326.1; chromosome 7:CM017327.1; chromosome 8:CM017328.1	VIBQ01	4602	2019-07-12T00:00:00Z	ftp://ftp.ncbi.nlm.nih.gov/genomes/all/GCA/006/937/295/GCA_006937295.1_ASM693729v1
214	Chamaecrista fasciculata	ftp://ftp.ncbi.nlm.nih.gov/genomes/all/GCA/003/254/925/GCA_003254925.1_ASM325492v1	SAMN08442482	PRJNA374770	GCA_003254925.1	Scaffold	429.103	33.6		QANZ01	56674	2018-06-19T00:00:00Z	ftp://ftp.ncbi.nlm.nih.gov/genomes/all/GCA/003/254/925/GCA_003254925.1_ASM325492v1
215	Vachellia collinsii	ftp://ftp.ncbi.nlm.nih.gov/genomes/all/GCA/006/871/305/GCA_006871305.1_Vcoll-BR_v1	SAMN09099243	PRJNA470667	GCA_006871305.1	Scaffold	461.065	33.3		QFDD01	122260	2019-07-10T00:00:00Z	ftp://ftp.ncbi.nlm.nih.gov/genomes/all/GCA/006/871/305/GCA_006871305.1_Vcoll-BR_v1
216	Mimosa pudica	ftp://ftp.ncbi.nlm.nih.gov/genomes/all/GCA/003/254/945/GCA_003254945.1_ASM325494v1	SAMN08442486	PRJNA374770	GCA_003254945.1	Scaffold	557.202	32.9		QANV01	97892	2018-06-19T00:00:00Z	ftp://ftp.ncbi.nlm.nih.gov/genomes/all/GCA/003/254/945/GCA_003254945.1_ASM325494v1
217	Prosopis alba	ftp://ftp.ncbi.nlm.nih.gov/genomes/all/GCF/004/799/145/GCF_004799145.1_ASM479914v1	SAMN10988825	PRJNA534081	GCA_004799145.1	Contig	707.162	34.3		SMJV01	6087	2019-04-17T00:00:00Z	ftp://ftp.ncbi.nlm.nih.gov/genomes/all/GCA/004/799/145/GCA_004799145.1_ASM479914v1
218	Cercis canadensis	ftp://ftp.ncbi.nlm.nih.gov/genomes/all/GCA/003/255/065/GCA_003255065.1_ASM325506v1	SAMN08442481	PRJNA374770	GCA_003255065.1	Scaffold	329.325	34		QAOA01	8828	2018-06-19T00:00:00Z	ftp://ftp.ncbi.nlm.nih.gov/genomes/all/GCA/003/255/065/GCA_003255065.1_ASM325506v1
219	Nissolia schottii	ftp://ftp.ncbi.nlm.nih.gov/genomes/all/GCA/003/254/905/GCA_003254905.1_ASM325490v1	SAMN08442487	PRJNA374770	GCA_003254905.1	Scaffold	466.099	35.6		QANU01	116213	2018-06-19T00:00:00Z	ftp://ftp.ncbi.nlm.nih.gov/genomes/all/GCA/003/254/905/GCA_003254905.1_ASM325490v1
220	Arachis duranensis	ftp://ftp.ncbi.nlm.nih.gov/genomes/all/GCF/000/817/695/GCF_000817695.2_Aradu1.1	SAMN02982871	PRJNA316327	GCA_000817695.2	Chromosome	1084.26	37.675	chromosome A01:NC_029772.2/CM003088.2; chromosome A02:NC_029773.2/CM003089.2; chromosome A03:NC_029774.2/CM003090.2; chromosome A04:NC_029775.2/CM003091.2; chromosome A05:NC_029776.2/CM003092.2; chromosome A06:NC_029777.2/CM003093.2; chromosome A07:NC_029778.2/CM003094.2; chromosome A08:NC_029779.2/CM003095.2; chromosome A09:NC_029780.2/CM003096.2; chromosome A10:NC_029781.2/CM003097.2	JQIN01	3189	2015-01-13T00:00:00Z	ftp://ftp.ncbi.nlm.nih.gov/genomes/all/GCA/000/817/695/GCA_000817695.2_Aradu1.1
221	Arachis hypogaea	ftp://ftp.ncbi.nlm.nih.gov/genomes/all/GCF/003/086/295/GCF_003086295.2_arahy.Tifrunner.gnm1.KYV3	SAMN08051159	PRJNA476953	GCA_003086295.2	Chromosome	2557.07	36.3472	chromosome Arahy.01:NC_037618.1/CM009801.1; chromosome Arahy.02:NC_037619.1/CM009802.1; chromosome Arahy.03:NC_037620.1/CM009803.1; chromosome Arahy.04:NC_037621.1/CM009804.1; chromosome Arahy.05:NC_037622.1/CM009805.1; chromosome Arahy.06:NC_037623.1/CM009806.1; chromosome Arahy.07:NC_037624.1/CM009807.1; chromosome Arahy.08:NC_037625.1/CM009808.1; chromosome Arahy.09:NC_037626.1/CM009809.1; chr…	PIVG01	385	2018-05-02T00:00:00Z	ftp://ftp.ncbi.nlm.nih.gov/genomes/all/GCA/003/086/295/GCA_003086295.2_arahy.Tifrunner.gnm1.KYV3
222	Arachis ipaensis	ftp://ftp.ncbi.nlm.nih.gov/genomes/all/GCF/000/816/755/GCF_000816755.2_Araip1.1	SAMN02982874	PRJNA316874	GCA_000816755.2	Chromosome	1353.5	37.7748	chromosome B01:NC_029785.2/CM003054.2; chromosome B02:NC_029786.2/CM003055.2; chromosome B03:NC_029787.2/CM003056.2; chromosome B04:NC_029788.2/CM003057.2; chromosome B05:NC_029789.2/CM003058.2; chromosome B06:NC_029790.2/CM003059.2; chromosome B07:NC_029791.2/CM003060.2; chromosome B08:NC_029792.2/CM003061.2; chromosome B09:NC_029793.2/CM003062.2; chromosome B10:NC_029794.2/CM003063.2	JQIO01	997	2014-12-11T00:00:00Z	ftp://ftp.ncbi.nlm.nih.gov/genomes/all/GCA/000/816/755/GCA_000816755.2_Araip1.1
223	Arachis monticola	ftp://ftp.ncbi.nlm.nih.gov/genomes/all/GCA/003/063/285/GCA_003063285.2_ASM306328v2	SAMN08378480	PRJNA430760	GCA_003063285.2	Chromosome	2618.65	37.4064	chromosome A01:CM009773.1; chromosome A02:CM009774.1; chromosome A03:CM009775.1; chromosome A04:CM009776.1; chromosome A05:CM009777.1; chromosome A06:CM009778.1; chromosome A07:CM009779.1; chromosome A08:CM009780.1; chromosome A09:CM009781.1; chromosome A10:CM009782.1; chromosome B01:CM009783.1; chromosome B02:CM009784.1; chromosome B03:CM009785.1; chromosome B04:CM009786.1; chromosome B05:CM0097…	QBTX01	6909	2018-04-23T00:00:00Z	ftp://ftp.ncbi.nlm.nih.gov/genomes/all/GCA/003/063/285/GCA_003063285.2_ASM306328v2
224	Lupinus angustifolius	ftp://ftp.ncbi.nlm.nih.gov/genomes/all/GCF/001/865/875/GCF_001865875.1_LupAngTanjil_v1.0	SAMN04215042	PRJNA356456	GCA_001865875.1	Chromosome	609.203	33.5664	chromosome LG01:NC_032009.1/CM007361.1; chromosome LG02:NC_032010.1/CM007362.1; chromosome LG03:NC_032011.1/CM007363.1; chromosome LG04:NC_032012.1/CM007364.1; chromosome LG05:NC_032013.1/CM007365.1; chromosome LG06:NC_032014.1/CM007366.1; chromosome LG07:NC_032015.1/CM007367.1; chromosome LG08:NC_032016.1/CM007368.1; chromosome LG09:NC_032017.1/CM007369.1; chromosome LG10:NC_032018.1/CM007370.1;…	MLAU01	14378	2016-11-01T00:00:00Z	ftp://ftp.ncbi.nlm.nih.gov/genomes/all/GCA/001/865/875/GCA_001865875.1_LupAngTanjil_v1.0
225	Cicer arietinum	ftp://ftp.ncbi.nlm.nih.gov/genomes/all/GCF/000/331/145/GCF_000331145.1_ASM33114v1	SAMN02981489	PRJNA190909	GCA_000331145.1	Chromosome	530.894	32.6705	chromosome Ca1:NC_021160.1/CM001764.1; chromosome Ca2:NC_021161.1/CM001765.1; chromosome Ca3:NC_021162.1/CM001766.1; chromosome Ca4:NC_021163.1/CM001767.1; chromosome Ca5:NC_021164.1/CM001768.1; chromosome Ca6:NC_021165.1/CM001769.1; chromosome Ca7:NC_021166.1/CM001770.1; chromosome Ca8:NC_021167.1/CM001771.1; chloroplast Pltd:NC_011163.1/	ANPC01	7545	2012-12-31T00:00:00Z	ftp://ftp.ncbi.nlm.nih.gov/genomes/all/GCA/000/331/145/GCA_000331145.1_ASM33114v1
226	Cicer echinospermum	ftp://ftp.ncbi.nlm.nih.gov/genomes/all/GCA/002/896/215/GCA_002896215.2_S2Drd065_v0.5	SAMN07949201	PRJNA418060	GCA_002896215.2	Scaffold	657.414	31.7		PGTU02	17305	2018-01-23T00:00:00Z	ftp://ftp.ncbi.nlm.nih.gov/genomes/all/GCA/002/896/215/GCA_002896215.2_S2Drd065_v0.5
227	Cicer reticulatum	ftp://ftp.ncbi.nlm.nih.gov/genomes/all/GCA/003/689/015/GCA_003689015.1_ASM368901v1	SAMN03105776	PRJNA263699	GCA_003689015.2	Chromosome	416.904	31.5188	linkage group LG1:CM010871.2; linkage group LG2:CM010872.2; linkage group LG3:CM010873.2; linkage group LG4:CM010874.2; linkage group LG5:CM010875.2; linkage group LG6:CM010876.2; linkage group LG7:CM010877.2; linkage group LG8:CM010878.2	QSLP02	3657	2018-10-25T00:00:00Z
228	Pisum sativum	ftp://ftp.ncbi.nlm.nih.gov/genomes/all/GCA/003/013/575/GCA_003013575.1_ASM301357v1	SAMN08429545	PRJNA432052	GCA_003013575.1	Scaffold	4275.93	37.7		PUCA01	5449423	2018-03-21T00:00:00Z	ftp://ftp.ncbi.nlm.nih.gov/genomes/all/GCA/003/013/575/GCA_003013575.1_ASM301357v1
229	Vicia faba	ftp://ftp.ncbi.nlm.nih.gov/genomes/all/GCA/001/375/635/GCA_001375635.1_VfEP_Reference-Unigene	SAMEA3311348	PRJEB8906	GCA_001375635.1	Contig	80.3627	38.9		CSVX01	74659	2015-03-24T00:00:00Z	ftp://ftp.ncbi.nlm.nih.gov/genomes/all/GCA/001/375/635/GCA_001375635.1_VfEP_Reference-Unigene
230	Medicago truncatula	ftp://ftp.ncbi.nlm.nih.gov/genomes/all/GCF/000/219/495/GCF_000219495.3_MedtrA17_4.0	SAMN02299339	PRJNA10791	GCA_000219495.2	Chromosome	412.924	34.047	chromosome 1:NC_016407.2/CM001217.2; chromosome 2:NC_016408.2/CM001218.2; chromosome 3:NC_016409.2/CM001219.2; chromosome 4:NC_016410.2/CM001220.2; chromosome 5:NC_016411.2/CM001221.2; chromosome 6:NC_016412.2/CM001222.2; chromosome 7:NC_016413.2/CM001223.2; chromosome 8:NC_016414.2/CM001224.2; chloroplast Pltd:NC_003119.6/	APNO01	2187	2011-08-12T00:00:00Z	ftp://ftp.ncbi.nlm.nih.gov/genomes/all/GCA/000/219/495/GCA_000219495.2_MedtrA17_4.0
231	Trifolium medium	ftp://ftp.ncbi.nlm.nih.gov/genomes/all/GCA/003/490/085/GCA_003490085.1_ASM349008v1	PRJNA315359	GCA_003490085.1	Scaffold	492.653	33.5		LXQA01	1471389	0	ftp://ftp.ncbi.nlm.nih.gov/genomes/all/GCA/003/490/085/GCA_003490085.1_ASM349008v1
232	Trifolium pratense	ftp://ftp.ncbi.nlm.nih.gov/genomes/all/GCA/900/292/005/GCA_900292005.1_Trifolium_pratense_genome_v3	SAMEA3360124	PRJEB9186	GCA_900292005.1	Chromosome	351.622	33.6664	chromosome 1:LT990601.1; chromosome 2:LT990602.1; chromosome 3:LT990603.1; chromosome 4:LT990604.1; chromosome 5:LT990605.1; chromosome 6:LT990606.1; chromosome 7:LT990607.1	OMTE01	38479	2018-03-18T00:00:00Z	ftp://ftp.ncbi.nlm.nih.gov/genomes/all/GCA/900/292/005/GCA_900292005.1_Trifolium_pratense_genome_v3
233	Trifolium subterraneum	ftp://ftp.ncbi.nlm.nih.gov/genomes/all/GCA/001/742/945/GCA_001742945.1_TSUd_r1.1	SAMD00004201	PRJDB2012	GCA_001742945.1	Scaffold	471.834	35.2		BCLP01	27424	2016-07-16T00:00:00Z	ftp://ftp.ncbi.nlm.nih.gov/genomes/all/GCA/001/742/945/GCA_001742945.1_TSUd_r1.1
234	Lotus japonicus	ftp://ftp.ncbi.nlm.nih.gov/genomes/all/GCA/000/181/115/GCA_000181115.2_Lj3.0	SAMD00011082	PRJDA28941	GCA_000181115.2	Contig	394.455	36.6		BABK02	44464	2008-05-28T00:00:00Z	ftp://ftp.ncbi.nlm.nih.gov/genomes/all/GCA/000/181/115/GCA_000181115.2_Lj3.0
235	Abrus precatorius	ftp://ftp.ncbi.nlm.nih.gov/genomes/all/GCF/003/935/025/GCF_003935025.1_Abrus_2018	SAMN10039699	PRJNA510631	GCA_003935025.1	Scaffold	347.23	31.8		QYUI01	160	2018-12-11T00:00:00Z	ftp://ftp.ncbi.nlm.nih.gov/genomes/all/GCA/003/935/025/GCA_003935025.1_Abrus_2018
236	Cajanus cajan	ftp://ftp.ncbi.nlm.nih.gov/genomes/all/GCF/000/340/665/GCF_000340665.1_C.cajan_V1.0	SAMN02981370	PRJNA376605	GCA_000340665.1	Chromosome	592.971	33.7105	chromosome 1:NC_033804.1/CM003603.1; chromosome 2:NC_033805.1/CM003604.1; chromosome 3:NC_033806.1/CM003605.1; chromosome 4:NC_033807.1/CM003606.1; chromosome 5:NC_033808.1/CM003607.1; chromosome 6:NC_033809.1/CM003608.1; chromosome 7:NC_033810.1/CM003609.1; chromosome 8:NC_033811.1/CM003610.1; chromosome 9:NC_033812.1/CM003611.1; chromosome 10:NC_033813.1/CM003612.1; chromosome 11:NC_033814.1/CM…	AGCT01	36536	2013-02-13T00:00:00Z	ftp://ftp.ncbi.nlm.nih.gov/genomes/all/GCA/000/340/665/GCA_000340665.1_C.cajan_V1.0
237	Glycine max	ftp://ftp.ncbi.nlm.nih.gov/genomes/all/GCF/000/004/515/GCF_000004515.5_Glycine_max_v2.1	SAMN00002965	PRJNA19861	GCA_000004515.4	Chromosome	979.046	35.1153	chromosome 1:NC_016088.3/CM000834.3; chromosome 2:NC_016089.3/CM000835.3; chromosome 3:NC_016090.3/CM000836.3; chromosome 4:NC_016091.3/CM000837.3; chromosome 5:NC_038241.1/CM000838.2; chromosome 6:NC_038242.1/CM000839.3; chromosome 7:NC_038243.1/CM000840.3; chromosome 8:NC_038244.1/CM000841.3; chromosome 9:NC_038245.1/CM000842.3; chromosome 10:NC_038246.1/CM000843.3; chromosome 11:NC_038247.1/CM…	ACUP03	1579	2010-01-05T00:00:00Z	ftp://ftp.ncbi.nlm.nih.gov/genomes/all/GCA/000/004/515/GCA_000004515.4_Glycine_max_v2.1
238	Glycine soja	ftp://ftp.ncbi.nlm.nih.gov/genomes/all/GCF/004/193/775/GCF_004193775.1_ASM419377v2	SAMN09862384	PRJNA525136	GCA_004193775.2	Chromosome	1013.77	35.2469	chromosome 1:NC_041002.1/CM014357.1; chromosome 2:NC_041003.1/CM014358.1; chromosome 3:NC_041004.1/CM014359.1; chromosome 4:NC_041005.1/CM014360.1; chromosome 5:NC_041006.1/CM014361.1; chromosome 6:NC_041007.1/CM014362.1; chromosome 7:NC_041008.1/CM014363.1; chromosome 8:NC_041009.1/CM014364.1; chromosome 9:NC_041010.1/CM014365.1; chromosome 10:NC_041011.1/CM014366.1; chromosome 11:NC_041012.1/CM…	QZWG01	1120	2019-02-13T00:00:00Z	ftp://ftp.ncbi.nlm.nih.gov/genomes/all/GCA/004/193/775/GCA_004193775.2_ASM419377v2
239	Mucuna pruriens	ftp://ftp.ncbi.nlm.nih.gov/genomes/all/GCA/003/370/565/GCA_003370565.1_ASM337056v1	SAMN07821433	PRJNA414658	GCA_003370565.1	Scaffold	397.042	31.4		QJKJ01	18487	2018-08-10T00:00:00Z	ftp://ftp.ncbi.nlm.nih.gov/genomes/all/GCA/003/370/565/GCA_003370565.1_ASM337056v1
241	Phaseolus vulgaris	ftp://ftp.ncbi.nlm.nih.gov/genomes/all/GCF/000/499/845/GCF_000499845.1_PhaVulg1_0	SAMN02981484	PRJNA41439	GCA_000499845.1	Chromosome	521.077	36.2199	chromosome 1:NC_023759.1/CM002288.1; chromosome 2:NC_023758.1/CM002289.1; chromosome 3:NC_023757.1/CM002290.1; chromosome 4:NC_023756.1/CM002291.1; chromosome 5:NC_023755.1/CM002292.1; chromosome 6:NC_023754.1/CM002293.1; chromosome 7:NC_023753.1/CM002294.1; chromosome 8:NC_023752.1/CM002295.1; chromosome 9:NC_023751.1/CM002296.1; chromosome 10:NC_023750.1/CM002297.1; chromosome 11:NC_023749.1/CM…	ANNZ01	708	2013-11-26T00:00:00Z	ftp://ftp.ncbi.nlm.nih.gov/genomes/all/GCA/000/499/845/GCA_000499845.1_PhaVulg1_0
242	Spatholobus suberectus	ftp://ftp.ncbi.nlm.nih.gov/genomes/all/GCA/004/329/165/GCA_004329165.1_ASM432916v1	SAMN09721040	PRJNA482912	GCA_004329165.1	Chromosome	798.47	31.7657	chromosome 1:CM014729.1; chromosome 2:CM014730.1; chromosome 3:CM014731.1; chromosome 4:CM014732.1; chromosome 5:CM014733.1; chromosome 6:CM014734.1; chromosome 7:CM014735.1; chromosome 8:CM014736.1; chromosome 9:CM014737.1	QUWT01	816	2019-03-06T00:00:00Z	ftp://ftp.ncbi.nlm.nih.gov/genomes/all/GCA/004/329/165/GCA_004329165.1_ASM432916v1
243	Vigna angularis	ftp://ftp.ncbi.nlm.nih.gov/genomes/all/GCF/001/190/045/GCF_001190045.1_Vigan1.1	SAMN03074979	PRJNA328963	GCA_001190045.1	Chromosome	467.301	34.6231	chromosome 1:NC_030637.1/CM003371.1; chromosome 2:NC_030638.1/CM003372.1; chromosome 3:NC_030639.1/CM003373.1; chromosome 4:NC_030640.1/CM003374.1; chromosome 5:NC_030641.1/CM003375.1; chromosome 6:NC_030642.1/CM003376.1; chromosome 7:NC_030643.1/CM003377.1; chromosome 8:NC_030644.1/CM003378.1; chromosome 9:NC_030645.1/CM003379.1; chromosome 10:NC_030646.1/CM003380.1; chromosome 11:NC_030647.1/CM…	JZJH01	37727	2015-07-30T00:00:00Z	ftp://ftp.ncbi.nlm.nih.gov/genomes/all/GCA/001/190/045/GCA_001190045.1_Vigan1.1
244	Vigna radiata	ftp://ftp.ncbi.nlm.nih.gov/genomes/all/GCF/000/741/045/GCF_000741045.1_Vradiata_ver6	SAMN02720863	PRJNA301363	GCA_000741045.2	Chromosome	463.638	34.3983	chromosome 1:NC_028351.1/CM003504.1; chromosome 2:NC_028352.1/CM003505.1; chromosome 3:NC_028353.1/CM003506.1; chromosome 4:NC_028354.1/CM003507.1; chromosome 5:NC_028355.1/CM003508.1; chromosome 6:NC_028356.1/CM003509.1; chromosome 7:NC_028357.1/CM003510.1; chromosome 8:NC_028358.1/CM003511.1; chromosome 9:NC_028359.1/CM003512.1; chromosome 10:NC_028360.1/CM003513.1; chromosome 11:NC_028361.1/CM…	JJMO01	2499	2014-08-18T00:00:00Z	ftp://ftp.ncbi.nlm.nih.gov/genomes/all/GCF/000/741/045/GCF_000741045.1_Vradiata_ver6
245	Vigna unguiculata	ftp://ftp.ncbi.nlm.nih.gov/genomes/all/GCF/004/118/075/GCF_004118075.1_ASM411807v1	SAMN06674009	PRJNA521068	GCA_004118075.1	Chromosome	519.067	33.0643	chromosome 1:NC_040279.1/CM014066.1; chromosome 2:NC_040280.1/CM014067.1; chromosome 3:NC_040281.1/CM014068.1; chromosome 4:NC_040282.1/CM014069.1; chromosome 5:NC_040283.1/CM014070.1; chromosome 6:NC_040284.1/CM014071.1; chromosome 7:NC_040285.1/CM014072.1; chromosome 8:NC_040286.1/CM014073.1; chromosome 9:NC_040287.1/CM014074.1; chromosome 10:NC_040288.1/CM014075.1; chromosome 11:NC_040289.1/CM…	NBOW01	682	2019-01-29T00:00:00Z	ftp://ftp.ncbi.nlm.nih.gov/genomes/all/GCA/004/118/075/GCA_004118075.1_ASM411807v1
246	Quillaja saponaria	ftp://ftp.ncbi.nlm.nih.gov/genomes/all/GCA/003/338/715/GCA_003338715.1_Draft.Quillaja.v1.0	SAMN07812699	PRJNA415043	GCA_003338715.1	Contig	248.908	34.2		PVLG01	48349	2018-07-24T00:00:00Z	ftp://ftp.ncbi.nlm.nih.gov/genomes/all/GCA/003/338/715/GCA_003338715.1_Draft.Quillaja.v1.0
247	Cannabis sativa	ftp://ftp.ncbi.nlm.nih.gov/genomes/all/GCA/003/417/725/GCA_003417725.2_ASM341772v2	SAMN09375800	PRJNA73819	GCA_003417725.2	Chromosome	1009.67	34.1395	chromosome 1:CM011605.1; chromosome 2:CM011606.1; chromosome 3:CM011607.1; chromosome 4:CM011608.1; chromosome 5:CM011609.1; chromosome 6:CM011610.1; chromosome 7:CM011611.1; chromosome 8:CM011612.1; chromosome 9:CM011613.1; chromosome 10:CM011614.1	QKVJ02	5303	2018-08-22T00:00:00Z	ftp://ftp.ncbi.nlm.nih.gov/genomes/all/GCA/003/417/725/GCA_003417725.2_ASM341772v2
248	Humulus lupulus	ftp://ftp.ncbi.nlm.nih.gov/genomes/all/GCA/000/831/365/GCA_000831365.1_hl_SW_version_1.0.fasta	SAMD00021060	PRJDB3233	GCA_000831365.1	Scaffold	2049.21	39.9		BBPC01	132476	2014-12-11T00:00:00Z
249	Parasponia andersonii	ftp://ftp.ncbi.nlm.nih.gov/genomes/all/GCA/002/914/805/GCA_002914805.1_PanWU01x14_asm01	SAMN03317003	PRJNA272473	GCA_002914805.1	Scaffold	475.834	32.6		JXTB01	2732	2018-02-02T00:00:00Z	ftp://ftp.ncbi.nlm.nih.gov/genomes/all/GCA/002/914/805/GCA_002914805.1_PanWU01x14_asm01
250	Trema orientale	ftp://ftp.ncbi.nlm.nih.gov/genomes/all/GCA/002/914/845/GCA_002914845.1_TorRG33x02_asm01	SAMN03322532	PRJNA272482	GCA_002914845.1	Scaffold	387.958	31.8		JXTC01	2756	2018-02-02T00:00:00Z	ftp://ftp.ncbi.nlm.nih.gov/genomes/all/GCA/002/914/845/GCA_002914845.1_TorRG33x02_asm01
251	Artocarpus camansi	ftp://ftp.ncbi.nlm.nih.gov/genomes/all/GCA/002/024/485/GCA_002024485.1_Acamansi1.0	SAMN04244126	PRJNA301299	GCA_002024485.1	Scaffold	631.308	33.2		LNSY01	396025	2017-03-09T00:00:00Z	ftp://ftp.ncbi.nlm.nih.gov/genomes/all/GCA/002/024/485/GCA_002024485.1_Acamansi1.0
252	Ficus carica	ftp://ftp.ncbi.nlm.nih.gov/genomes/all/GCA/002/002/945/GCA_002002945.1_F.carica_assembly01	SAMD00051603	PRJDB4615	GCA_002002945.1	Scaffold	247.091	0		BDEM01	27995	2017-01-27T21:17:00Z	ftp://ftp.ncbi.nlm.nih.gov/genomes/all/GCA/002/002/945/GCA_002002945.1_F.carica_assembly01
253	Ficus erecta	ftp://ftp.ncbi.nlm.nih.gov/genomes/all/GCA/008/635/985/GCA_008635985.1_FER_r1.1	SAMD00181892	PRJDB8644	GCA_008635985.1	Contig	595.835	34.3		BKCH01	2455	2019-09-18T23:55:00Z	ftp://ftp.ncbi.nlm.nih.gov/genomes/all/GCA/008/635/985/GCA_008635985.1_FER_r1.1
254	Morus notabilis	ftp://ftp.ncbi.nlm.nih.gov/genomes/all/GCF/000/414/095/GCF_000414095.1_ASM41409v2	SAMN02141246	PRJNA202089	GCA_000414095.2	Scaffold	320.379	35.5		ATGF01	31301	2013-06-24T00:00:00Z	ftp://ftp.ncbi.nlm.nih.gov/genomes/all/GCA/000/414/095/GCA_000414095.2_ASM41409v2
255	Ochetophila trinervis	ftp://ftp.ncbi.nlm.nih.gov/genomes/all/GCA/003/254/975/GCA_003254975.1_ASM325497v1	SAMN08442484	PRJNA374770	GCA_003254975.1	Scaffold	309.116	33.2		QANX01	8237	2018-06-19T00:00:00Z	ftp://ftp.ncbi.nlm.nih.gov/genomes/all/GCA/003/254/975/GCA_003254975.1_ASM325497v1
256	Rhamnella rubrinervis	ftp://ftp.ncbi.nlm.nih.gov/genomes/all/GCA/007/844/105/GCA_007844105.1_ASM784410v1	SAMN12217163	PRJNA554263	GCA_007844105.1	Chromosome	245.336	34.0436	linkage group LG1:CM017574.1; linkage group LG10:CM017575.1; linkage group LG11:CM017576.1; linkage group LG12:CM017577.1; linkage group LG2:CM017578.1; linkage group LG3:CM017579.1; linkage group LG4:CM017580.1; linkage group LG5:CM017581.1; linkage group LG6:CM017582.1; linkage group LG7:CM017583.1; linkage group LG8:CM017584.1; linkage group LG9:CM017585.1	VOIH01	133	2019-08-05T00:00:00Z	ftp://ftp.ncbi.nlm.nih.gov/genomes/all/GCA/007/844/105/GCA_007844105.1_ASM784410v1
257	Ziziphus jujuba	ftp://ftp.ncbi.nlm.nih.gov/genomes/all/GCF/000/826/755/GCF_000826755.1_ZizJuj_1.1	SAMN02918186	PRJNA315994	GCA_000826755.1	Chromosome	437.754	34.1503	chromosome 1:NC_029679.1/CM003114.1; chromosome 2:NC_029680.1/CM003115.1; chromosome 3:NC_029681.1/CM003116.1; chromosome 4:NC_029682.1/CM003117.1; chromosome 5:NC_029683.1/CM003118.1; chromosome 6:NC_029684.1/CM003119.1; chromosome 7:NC_029685.1/CM003120.1; chromosome 8:NC_029686.1/CM003121.1; chromosome 9:NC_029687.1/CM003122.1; chromosome 10:NC_029688.1/CM003123.1; chromosome 11:NC_029689.1/CM…	JREP01	5897	2014-10-24T00:00:00Z	ftp://ftp.ncbi.nlm.nih.gov/genomes/all/GCA/000/826/755/GCA_000826755.1_ZizJuj_1.1
258	Prunus avium	ftp://ftp.ncbi.nlm.nih.gov/genomes/all/GCF/002/207/925/GCF_002207925.1_PAV_r1.0	SAMD00052827	PRJDB4877	GCA_002207925.1	Scaffold	272.362	38.8		BDGV01	10148	2017-06-01T00:00:00Z	ftp://ftp.ncbi.nlm.nih.gov/genomes/all/GCA/002/207/925/GCA_002207925.1_PAV_r1.0
259	Prunus dulcis	ftp://ftp.ncbi.nlm.nih.gov/genomes/all/GCA/902/201/215/GCA_902201215.1_ALMONDv2	SAMEA5704668	PRJEB32994	GCA_902201215.1	Chromosome	227.599	37.7187	chromosome 1:LR694006.1; chromosome 2:LR694007.1; chromosome 3:LR694008.1; chromosome 4:LR694009.1; chromosome 5:LR694010.1; chromosome 6:LR694011.1; chromosome 7:LR694012.1; chromosome 8:LR694013.1	CABIKO01	691	2019-09-10T00:00:00Z	ftp://ftp.ncbi.nlm.nih.gov/genomes/all/GCA/902/201/215/GCA_902201215.1_ALMONDv2
260	Prunus mume	ftp://ftp.ncbi.nlm.nih.gov/genomes/all/GCF/000/346/735/GCF_000346735.1_P.mume_V1.0	SAMN02981503	PRJNA246160	GCA_000346735.1	Chromosome	234.03	38.327	linkage group LG1:NC_024126.1/CM001826.1; linkage group LG2:NC_024127.1/CM001827.1; linkage group LG3:NC_024128.1/CM001828.1; linkage group LG4:NC_024129.1/CM001829.1; linkage group LG5:NC_024130.1/CM001830.1; linkage group LG6:NC_024131.1/CM001831.1; linkage group LG7:NC_024132.1/CM001832.1; linkage group LG8:NC_024133.1/CM001833.1; plastid Pltd:NC_023798.1/	AOHF01	8626	2013-02-28T00:00:00Z	ftp://ftp.ncbi.nlm.nih.gov/genomes/all/GCA/000/346/735/GCA_000346735.1_P.mume_V1.0
261	Prunus persica	ftp://ftp.ncbi.nlm.nih.gov/genomes/all/GCF/000/346/465/GCF_000346465.2_Prunus_persica_NCBIv2	SAMN02981429	PRJNA31227	GCA_000346465.2	Chromosome	227.569	37.6659	chromosome G1:NC_034009.1/CM007651.1; chromosome G2:NC_034010.1/CM007652.1; chromosome G3:NC_034011.1/CM007653.1; chromosome G4:NC_034012.1/CM007654.1; chromosome G5:NC_034013.1/CM007655.1; chromosome G6:NC_034014.1/CM007656.1; chromosome G7:NC_034015.1/CM007657.1; chromosome G8:NC_034016.1/CM007658.1; chloroplast Pltd:NC_014697.1/	AKXU02	192	2013-03-14T00:00:00Z	ftp://ftp.ncbi.nlm.nih.gov/genomes/all/GCA/000/346/465/GCA_000346465.2_Prunus_persica_NCBIv2
262	Prunus yedoensis	ftp://ftp.ncbi.nlm.nih.gov/genomes/all/GCA/900/382/725/GCA_900382725.1_Pyn.v1	SAMEA4609968	PRJEB25736	GCA_900382725.1	Scaffold	319.21	37.6		OSDV01	4016	2018-07-08T00:00:00Z
263	Malus baccata	ftp://ftp.ncbi.nlm.nih.gov/genomes/all/GCA/006/547/085/GCA_006547085.1_Malus_baccata_v1.0	SAMN08323692	PRJNA428857	GCA_006547085.1	Scaffold	674.412	35.1		VIEB01	47473	2019-07-03T00:00:00Z	ftp://ftp.ncbi.nlm.nih.gov/genomes/all/GCA/006/547/085/GCA_006547085.1_Malus_baccata_v1.0
264	Malus domestica	ftp://ftp.ncbi.nlm.nih.gov/genomes/all/GCF/000/148/765/GCF_000148765.1_MalDomGD1.0	SAMN02981243	PRJNA28845	GCA_000148765.2	Chromosome	1874.77	45.3151	chromosome 1:CM001026.1; chromosome 2:CM001027.1; chromosome 3:CM001028.1; chromosome 4:CM001029.1; chromosome 5:CM001030.1; chromosome 6:CM001031.1; chromosome 7:CM001032.1; chromosome 8:CM001033.1; chromosome 9:CM001034.1; chromosome 10:CM001035.1; chromosome 11:CM001036.1; chromosome 12:CM001037.1; chromosome 13:CM001038.1; chromosome 14:CM001039.1; chromosome 15:CM001040.1; chromosome 16:CM00…	ACYM01	1667	2010-09-03T00:00:00Z	ftp://ftp.ncbi.nlm.nih.gov/genomes/all/GCA/000/148/765/GCA_000148765.2_MalDomGD1.0
265	Pyrus betulifolia	ftp://ftp.ncbi.nlm.nih.gov/genomes/all/GCA/007/844/245/GCA_007844245.1_ASM784424v1	SAMN11264821	PRJNA529328	GCA_007844245.1	Chromosome	532.747	37.5496	chromosome 1:CM017587.1; chromosome 2:CM017588.1; chromosome 3:CM017589.1; chromosome 4:CM017590.1; chromosome 5:CM017591.1; chromosome 6:CM017592.1; chromosome 7:CM017593.1; chromosome 8:CM017594.1; chromosome 9:CM017595.1; chromosome 10:CM017596.1; chromosome 11:CM017597.1; chromosome 12:CM017598.1; chromosome 13:CM017599.1; chromosome 14:CM017600.1; chromosome 15:CM017601.1; chromosome 16:CM01…	VDML01	139	2019-08-05T00:00:00Z	ftp://ftp.ncbi.nlm.nih.gov/genomes/all/GCA/007/844/245/GCA_007844245.1_ASM784424v1
266	Pyrus x bretschneideri	ftp://ftp.ncbi.nlm.nih.gov/genomes/all/GCF/000/315/295/GCF_000315295.1_Pbr_v1.0	SAMN01797448	PRJNA259338	GCA_000315295.1	Scaffold	508.551	37.5		AJSU01	2182	2012-11-21T00:00:00Z	ftp://ftp.ncbi.nlm.nih.gov/genomes/all/GCA/000/315/295/GCA_000315295.1_Pbr_v1.0
267	Pyrus ussuriensis x Pyrus communis	ftp://ftp.ncbi.nlm.nih.gov/genomes/all/GCA/008/932/095/GCA_008932095.1_ASM893209v1	SAMN10188208	PRJNA494996	GCA_008932095.1	Chromosome	510.637	37.3742	chromosome 1:CM018505.1; chromosome 2:CM018506.1; chromosome 3:CM018507.1; chromosome 4:CM018508.1; chromosome 5:CM018509.1; chromosome 6:CM018510.1; chromosome 7:CM018511.1; chromosome 8:CM018512.1; chromosome 9:CM018513.1; chromosome 10:CM018514.1; chromosome 11:CM018515.1; chromosome 12:CM018516.1; chromosome 13:CM018517.1; chromosome 14:CM018518.1; chromosome 15:CM018519.1; chromosome 16:CM01…	SMOL01	785	2019-10-09T00:00:00Z	ftp://ftp.ncbi.nlm.nih.gov/genomes/all/GCA/008/932/095/GCA_008932095.1_ASM893209v1
268	Dryas drummondii	ftp://ftp.ncbi.nlm.nih.gov/genomes/all/GCA/003/254/865/GCA_003254865.1_ASM325486v1	SAMN08442485	PRJNA374770	GCA_003254865.1	Scaffold	225.547	36.4		QANW01	13357	2018-06-19T00:00:00Z	ftp://ftp.ncbi.nlm.nih.gov/genomes/all/GCA/003/254/865/GCA_003254865.1_ASM325486v1
269	Purshia tridentata	ftp://ftp.ncbi.nlm.nih.gov/genomes/all/GCA/003/254/885/GCA_003254885.1_ASM325488v1	SAMN08442488	PRJNA374770	GCA_003254885.1	Scaffold	175.971	36.1		QANT01	9353	2018-06-19T00:00:00Z	ftp://ftp.ncbi.nlm.nih.gov/genomes/all/GCA/003/254/885/GCA_003254885.1_ASM325488v1
270	Geum urbanum	ftp://ftp.ncbi.nlm.nih.gov/genomes/all/GCA/900/236/755/GCA_900236755.1_G_urb_d1	SAMEA104363642	PRJEB23412	GCA_900236755.1	Scaffold	1217.04	0		OEJZ01	170029	2018-01-15T00:00:00Z	ftp://ftp.ncbi.nlm.nih.gov/genomes/all/GCA/900/236/755/GCA_900236755.1_G_urb_d1
271	Fragaria iinumae	ftp://ftp.ncbi.nlm.nih.gov/genomes/all/GCA/000/511/975/GCA_000511975.1_FII_r1.1	SAMD00010918	PRJDB1478	GCA_000511975.1	Scaffold	199.628	39.1		BATU01	117822	2013-11-27T00:00:00Z	ftp://ftp.ncbi.nlm.nih.gov/genomes/all/GCA/000/511/975/GCA_000511975.1_FII_r1.1
272	Fragaria nipponica	ftp://ftp.ncbi.nlm.nih.gov/genomes/all/GCA/000/512/025/GCA_000512025.1_FNI_r1.1	SAMD00010925	PRJDB1479	GCA_000512025.1	Scaffold	206.415	38.4		BATV01	215024	2013-11-27T00:00:00Z	ftp://ftp.ncbi.nlm.nih.gov/genomes/all/GCA/000/512/025/GCA_000512025.1_FNI_r1.1
273	Fragaria nubicola	ftp://ftp.ncbi.nlm.nih.gov/genomes/all/GCA/000/511/995/GCA_000511995.1_FNU_r1.1	SAMD00010927	PRJDB1480	GCA_000511995.1	Scaffold	203.686	38.2		BATW01	210780	2013-11-27T00:00:00Z	ftp://ftp.ncbi.nlm.nih.gov/genomes/all/GCA/000/511/995/GCA_000511995.1_FNU_r1.1
274	Fragaria orientalis	ftp://ftp.ncbi.nlm.nih.gov/genomes/all/GCA/000/517/285/GCA_000517285.1_FOR_r1.1	SAMD00010919	PRJDB1481	GCA_000517285.1	Scaffold	214.184	38.1		BATX01	323163	2013-11-27T00:00:00Z	ftp://ftp.ncbi.nlm.nih.gov/genomes/all/GCA/000/517/285/GCA_000517285.1_FOR_r1.1
275	Fragaria vesca	ftp://ftp.ncbi.nlm.nih.gov/genomes/all/GCF/000/184/155/GCF_000184155.1_FraVesHawaii_1.0	SAMN00120060	PRJNA60037	GCA_000184155.1	Chromosome	214.373	38.9793	linkage group LG1:NC_020491.1/CM001053.1; linkage group LG2:NC_020492.1/CM001054.1; linkage group LG3:NC_020493.1/CM001055.1; linkage group LG4:NC_020494.1/CM001056.1; linkage group LG5:NC_020495.1/CM001057.1; linkage group LG6:NC_020496.1/CM001058.1; linkage group LG7:NC_020497.1/CM001059.1; chloroplast Pltd:NC_015206.1/	AEMH01	3048	2010-12-22T00:00:00Z	ftp://ftp.ncbi.nlm.nih.gov/genomes/all/GCF/000/184/155/GCF_000184155.1_FraVesHawaii_1.0
276	Fragaria x ananassa	ftp://ftp.ncbi.nlm.nih.gov/genomes/all/GCA/000/511/835/GCA_000511835.1_FAN_r1.1		PRJDB1477	GCA_000511835.1	Scaffold	697.762	39.2		BATT01	625966	2013-11-27T00:00:00Z
277	Rosa chinensis	ftp://ftp.ncbi.nlm.nih.gov/genomes/all/GCF/002/994/745/GCF_002994745.1_RchiOBHm-V2	SAMN07737764	PRJNA438537	GCA_002994745.1	Chromosome	513.854	38.8437	chromosome 1:NC_037088.1/CM009582.1; chromosome 2:NC_037089.1/CM009583.1; chromosome 3:NC_037090.1/CM009584.1; chromosome 4:NC_037091.1/CM009585.1; chromosome 5:NC_037092.1/CM009586.1; chromosome 6:NC_037093.1/CM009587.1; chromosome 7:NC_037094.1/CM009588.1; mitochondrion MT:CM009589.1; chloroplast Pltd:CM009590.1	PDCK01	45	2018-03-13T00:00:00Z	ftp://ftp.ncbi.nlm.nih.gov/genomes/all/GCA/002/994/745/GCA_002994745.1_RchiOBHm-V2
278	Rosa lucieae	ftp://ftp.ncbi.nlm.nih.gov/genomes/all/GCA/006/954/505/GCA_006954505.1_ILVO_Rwic_1.0	SAMN10395143	PRJNA504542	GCA_006954505.1	Scaffold	786.105	38.7		RQIQ01	500476	2019-07-12T00:00:00Z	ftp://ftp.ncbi.nlm.nih.gov/genomes/all/GCA/006/954/505/GCA_006954505.1_ILVO_Rwic_1.0
279	Rosa multiflora	ftp://ftp.ncbi.nlm.nih.gov/genomes/all/GCA/002/564/525/GCA_002564525.1_RMU_r2.0	SAMD00050899	PRJDB4738	GCA_002564525.1	Scaffold	739.638	34.7		BDJD01	83189	2017-10-12T00:00:00Z	ftp://ftp.ncbi.nlm.nih.gov/genomes/all/GCA/002/564/525/GCA_002564525.1_RMU_r2.0
280	Rosa x damascena	ftp://ftp.ncbi.nlm.nih.gov/genomes/all/GCA/001/662/545/GCA_001662545.1_ASM166254v1	SAMN05017599	PRJNA322107	GCA_001662545.1	Scaffold	711.72	37.6		LYNE01	307872	2016-06-13T00:00:00Z	ftp://ftp.ncbi.nlm.nih.gov/genomes/all/GCA/001/662/545/GCA_001662545.1_ASM166254v1
281	Boehmeria nivea	ftp://ftp.ncbi.nlm.nih.gov/genomes/all/GCA/002/937/015/GCA_002937015.1_ASM293701v1	SAMN07982878	PRJNA417329	GCA_002937015.1	Scaffold	344.617	32.7		PHNS01	12775	2018-02-21T00:00:00Z	ftp://ftp.ncbi.nlm.nih.gov/genomes/all/GCA/002/937/015/GCA_002937015.1_ASM293701v1
282	Begonia fuchsioides	ftp://ftp.ncbi.nlm.nih.gov/genomes/all/GCA/003/255/005/GCA_003255005.1_ASM325500v1	SAMN08442479	PRJNA374770	GCA_003255005.1	Scaffold	373.914	37.4		QAOC01	55006	2018-06-19T00:00:00Z	ftp://ftp.ncbi.nlm.nih.gov/genomes/all/GCA/003/255/005/GCA_003255005.1_ASM325500v1
283	Benincasa hispida	ftp://ftp.ncbi.nlm.nih.gov/genomes/all/GCA/009/727/055/GCA_009727055.1_ASM972705v1	SAMN08364809	PRJNA430006	GCA_009727055.1	Chromosome	912.951	34.9866	chromosome 1:CM019126.1; chromosome 2:CM019127.1; chromosome 3:CM019128.1; chromosome 4:CM019129.1; chromosome 5:CM019130.1; chromosome 6:CM019131.1; chromosome 7:CM019132.1; chromosome 8:CM019133.1; chromosome 9:CM019134.1; chromosome 10:CM019135.1; chromosome 11:CM019136.1; chromosome 12:CM019137.1	WEIL01	1791	2019-12-02T00:00:00Z	ftp://ftp.ncbi.nlm.nih.gov/genomes/all/GCA/009/727/055/GCA_009727055.1_ASM972705v1
284	Citrullus lanatus	ftp://ftp.ncbi.nlm.nih.gov/genomes/all/GCA/000/238/415/GCA_000238415.1_CiLa_1.0	SAMN02981367	PRJNA72695	GCA_000238415.2	Chromosome	365.45	33.8103	chromosome 1:CM018018.1; chromosome 2:CM018019.1; chromosome 3:CM018020.1; chromosome 4:CM018021.1; chromosome 5:CM018022.1; chromosome 6:CM018023.1; chromosome 7:CM018024.1; chromosome 8:CM018025.1; chromosome 9:CM018026.1; chromosome 10:CM018027.1; chromosome 11:CM018028.1	AGCB02	113	2011-12-13T00:00:00Z
285	Cucumis melo	ftp://ftp.ncbi.nlm.nih.gov/genomes/all/GCF/000/313/045/GCF_000313045.1_ASM31304v1	SAMEA2272451	PRJEB68	GCA_000313045.1	Scaffold	374.928	34.9008	chloroplast Pltd:NC_015983.1/	CAJI01	31464	2012-06-29T00:00:00Z	ftp://ftp.ncbi.nlm.nih.gov/genomes/all/GCA/000/313/045/GCA_000313045.1_ASM31304v1
286	Cucumis sativus	ftp://ftp.ncbi.nlm.nih.gov/genomes/all/GCF/000/004/075/GCF_000004075.2_ASM407v2	SAMN02953750	PRJNA33619	GCA_000004075.2	Chromosome	195.669	32.7902	chromosome 1:NC_026655.1/CM002922.1; chromosome 2:NC_026656.1/CM002923.1; chromosome 3:NC_026657.1/CM002924.1; chromosome 4:NC_026658.1/CM002925.1; chromosome 5:NC_026659.1/CM002926.1; chromosome 6:NC_026660.1/CM002927.1; chromosome 7:NC_026661.1/CM002928.1; mitochondrion 1:NC_016005.1/CM002922.1; mitochondrion 2:NC_016004.1/CM002923.1; mitochondrion 3:NC_016006.1/CM002924.1; chloroplast Pltd:NC_…	ACHR02	190	2009-10-20T00:00:00Z	ftp://ftp.ncbi.nlm.nih.gov/genomes/all/GCA/000/004/075/GCA_000004075.2_ASM407v2
287	Lagenaria siceraria	ftp://ftp.ncbi.nlm.nih.gov/genomes/all/GCA/003/268/545/GCA_003268545.1_Lsi_v1.0	SAMN07159290	PRJNA387611	GCA_003268545.1	Scaffold	313.387	30.1		NHZF01	438	2018-06-27T00:00:00Z	ftp://ftp.ncbi.nlm.nih.gov/genomes/all/GCA/003/268/545/GCA_003268545.1_Lsi_v1.0
288	Cucurbita argyrosperma	ftp://ftp.ncbi.nlm.nih.gov/genomes/all/GCA/004/115/005/GCA_004115005.1_ASM411500v1	SAMN10795727	PRJNA485527	GCA_004115005.1	Scaffold	230.034	36.2006	chloroplast Pltd:CM014103.1	SDJN01	938	2019-01-28T00:00:00Z
289	Cucurbita maxima	ftp://ftp.ncbi.nlm.nih.gov/genomes/all/GCF/002/738/345/GCF_002738345.1_Cmax_1.0	SAMN06886671	PRJNA418295	GCA_002738345.1	Scaffold	271.413	36.6		NEWN01	8299	2017-10-31T00:00:00Z	ftp://ftp.ncbi.nlm.nih.gov/genomes/all/GCA/002/738/345/GCA_002738345.1_Cmax_1.0
290	Cucurbita moschata	ftp://ftp.ncbi.nlm.nih.gov/genomes/all/GCF/002/738/365/GCF_002738365.1_Cmos_1.0	SAMN06886672	PRJNA418582	GCA_002738365.1	Scaffold	269.943	36.8		NEWM01	3500	2017-10-31T00:00:00Z	ftp://ftp.ncbi.nlm.nih.gov/genomes/all/GCA/002/738/365/GCA_002738365.1_Cmos_1.0
292	Momordica charantia	ftp://ftp.ncbi.nlm.nih.gov/genomes/all/GCF/001/995/035/GCF_001995035.1_ASM199503v1	SAMD00048603	PRJDB4642	GCA_001995035.1	Scaffold	285.614	35.8		BDCS01	1052	2016-12-26T20:44:00Z	ftp://ftp.ncbi.nlm.nih.gov/genomes/all/GCA/001/995/035/GCA_001995035.1_ASM199503v1
293	Datisca glomerata	ftp://ftp.ncbi.nlm.nih.gov/genomes/all/GCA/003/255/025/GCA_003255025.1_ASM325502v1	SAMN08442483	PRJNA374770	GCA_003255025.1	Scaffold	688.404	34.5		QANY01	13864	2018-06-19T00:00:00Z	ftp://ftp.ncbi.nlm.nih.gov/genomes/all/GCA/003/255/025/GCA_003255025.1_ASM325502v1
294	Alnus glutinosa	ftp://ftp.ncbi.nlm.nih.gov/genomes/all/GCA/003/254/965/GCA_003254965.1_ASM325496v1	SAMN08442478	PRJNA374770	GCA_003254965.1	Scaffold	611.874	33		QAOD01	167345	2018-06-19T00:00:00Z	ftp://ftp.ncbi.nlm.nih.gov/genomes/all/GCA/003/254/965/GCA_003254965.1_ASM325496v1
295	Betula nana	ftp://ftp.ncbi.nlm.nih.gov/genomes/all/GCA/000/327/005/GCA_000327005.1_ASM32700v1	SAMEA2271942	PRJEB576	GCA_000327005.1	Scaffold	564.011	38.4		CAOK01	551915	2012-11-28T00:00:00Z	ftp://ftp.ncbi.nlm.nih.gov/genomes/all/GCA/000/327/005/GCA_000327005.1_ASM32700v1
296	Betula pendula	ftp://ftp.ncbi.nlm.nih.gov/genomes/all/GCA/900/184/695/GCA_900184695.1_Bpev01	SAMEA104091830	PRJEB14544	GCA_900184695.1	Scaffold	435.915	43.4386	mitochondrion MT:LT855379.1; chloroplast Pltd:LT855378.1	FXXK01	5644	2017-05-25T00:00:00Z	ftp://ftp.ncbi.nlm.nih.gov/genomes/all/GCA/900/184/695/GCA_900184695.1_Bpev01
297	Casuarina equisetifolia	ftp://ftp.ncbi.nlm.nih.gov/genomes/all/GCA/003/795/335/GCA_003795335.1_ASM379533v1	SAMN08939822	PRJNA450482	GCA_003795335.1	Scaffold	301.458	36.1		RDRV01	2936	2018-11-19T00:00:00Z
298	Casuarina glauca	ftp://ftp.ncbi.nlm.nih.gov/genomes/all/GCA/003/255/045/GCA_003255045.1_ASM325504v1	SAMN08442480	PRJNA374770	GCA_003255045.1	Scaffold	282.811	36		QAOB01	39787	2018-06-19T00:00:00Z	ftp://ftp.ncbi.nlm.nih.gov/genomes/all/GCA/003/255/045/GCA_003255045.1_ASM325504v1
299	Castanea mollissima	ftp://ftp.ncbi.nlm.nih.gov/genomes/all/GCA/000/763/605/GCA_000763605.1_ASM76360v1	SAMN02640765	PRJNA46687	GCA_000763605.1	Scaffold	833.241	36.1		JRKL01	133589	2014-10-03T00:00:00Z	ftp://ftp.ncbi.nlm.nih.gov/genomes/all/GCA/000/763/605/GCA_000763605.1_ASM76360v1
300	Fagus sylvatica	ftp://ftp.ncbi.nlm.nih.gov/genomes/all/GCA/003/347/535/GCA_003347535.1_UKW_Fsyl_0.5	SAMN08948264	PRJNA450822	GCA_003347535.1	Scaffold	428.2	34.9		QCXR01	8673	2018-07-31T00:00:00Z	ftp://ftp.ncbi.nlm.nih.gov/genomes/all/GCA/003/347/535/GCA_003347535.1_UKW_Fsyl_0.5
301	Quercus lobata	ftp://ftp.ncbi.nlm.nih.gov/genomes/all/GCA/001/633/185/GCA_001633185.2_ValleyOak3.0	SAMN10584531	PRJNA574457	GCA_001633185.2	Chromosome	846.07	35.4253	chromosome 1:NC_044904.1/CM012293.1; chromosome 2:NC_044905.1/CM012294.1; chromosome 3:NC_044906.1/CM012295.1; chromosome 4:NC_044907.1/CM012296.1; chromosome 5:NC_044908.1/CM012297.1; chromosome 6:NC_044909.1/CM012298.1; chromosome 7:NC_044910.1/CM012299.1; chromosome 8:NC_044911.1/CM012300.1; chromosome 9:NC_044912.1/CM012301.1; chromosome 10:NC_044913.1/CM012302.1; chromosome 11:NC_044914.1/CM…	LRBV02	2010	2016-04-28T00:00:00Z	ftp://ftp.ncbi.nlm.nih.gov/genomes/all/GCA/001/633/185/GCA_001633185.2_ValleyOak3.0
302	Quercus robur	ftp://ftp.ncbi.nlm.nih.gov/genomes/all/GCA/900/291/515/GCA_900291515.1_Q_robur_v1	SAMEA103897756	PRJEB19898	GCA_900291515.1	Scaffold	814.336	35.8		OLKR01	550	2018-03-09T00:00:00Z	ftp://ftp.ncbi.nlm.nih.gov/genomes/all/GCA/900/291/515/GCA_900291515.1_Q_robur_v1
303	Quercus suber	ftp://ftp.ncbi.nlm.nih.gov/genomes/all/GCF/002/906/115/GCF_002906115.1_CorkOak1.0	SAMN07312269	PRJNA433227	GCA_002906115.1	Scaffold	953.299	36.5		PKMF01	23344	2018-01-29T00:00:00Z	ftp://ftp.ncbi.nlm.nih.gov/genomes/all/GCA/002/906/115/GCA_002906115.1_CorkOak1.0
304	Juglans cathayensis	ftp://ftp.ncbi.nlm.nih.gov/genomes/all/GCA/003/122/765/GCA_003122765.1_ASM312276v1	SAMN08795866	PRJNA445704	GCA_003122765.1	Scaffold	600.151	0		QEOU01	19972	2018-05-14T00:00:00Z	ftp://ftp.ncbi.nlm.nih.gov/genomes/all/GCA/003/122/765/GCA_003122765.1_ASM312276v1
305	Juglans hindsii	ftp://ftp.ncbi.nlm.nih.gov/genomes/all/GCA/003/123/825/GCA_003123825.1_ASM312382v1	SAMN08795864	PRJNA445704	GCA_003123825.1	Scaffold	611.109	34.4		QEOW01	73433	2018-05-14T00:00:00Z	ftp://ftp.ncbi.nlm.nih.gov/genomes/all/GCA/003/123/825/GCA_003123825.1_ASM312382v1
306	Juglans mandshurica	ftp://ftp.ncbi.nlm.nih.gov/genomes/all/GCA/002/916/435/GCA_002916435.1_m4v1	SAMN08193750	PRJNA356989	GCA_002916435.1	Scaffold	558.071	0		PKSJ01	13809	2018-02-05T00:00:00Z	ftp://ftp.ncbi.nlm.nih.gov/genomes/all/GCA/002/916/435/GCA_002916435.1_m4v1
307	Juglans microcarpa	ftp://ftp.ncbi.nlm.nih.gov/genomes/all/GCA/003/123/845/GCA_003123845.1_ASM312384v1	SAMN08795863	PRJNA445704	GCA_003123845.1	Scaffold	913.972	34.3		QEOX01	112570	2018-05-14T00:00:00Z	ftp://ftp.ncbi.nlm.nih.gov/genomes/all/GCA/003/123/845/GCA_003123845.1_ASM312384v1
308	Juglans microcarpa x Juglans regia	ftp://ftp.ncbi.nlm.nih.gov/genomes/all/GCA/004/785/585/GCA_004785585.1_JrSerr_v1.0	SAMN09474938	PRJNA413991	GCA_004785585.1	Chromosome	534.672	36.1941	chromosome 1D:CM015649.1; chromosome 1S:CM015650.1; chromosome 2D:CM015651.1; chromosome 2S:CM015652.1; chromosome 3D:CM015653.1; chromosome 3S:CM015654.1; chromosome 4D:CM015655.1; chromosome 4S:CM015656.1; chromosome 5D:CM015657.1; chromosome 5S:CM015658.1; chromosome 6D:CM015659.1; chromosome 6S:CM015660.1; chromosome 7D:CM015661.1; chromosome 7S:CM015662.1; chromosome 8D:CM015663.1; chromosom…	QKZY01	73	2019-04-12T00:00:00Z	ftp://ftp.ncbi.nlm.nih.gov/genomes/all/GCA/004/785/585/GCA_004785585.1_JrSerr_v1.0
309	Juglans nigra	ftp://ftp.ncbi.nlm.nih.gov/genomes/all/GCA/003/123/865/GCA_003123865.1_ASM312386v1	SAMN08795865	PRJNA445704	GCA_003123865.1	Scaffold	620.767	34.8		QEOV01	90472	2018-05-14T00:00:00Z	ftp://ftp.ncbi.nlm.nih.gov/genomes/all/GCA/003/123/865/GCA_003123865.1_ASM312386v1
310	Juglans regia	ftp://ftp.ncbi.nlm.nih.gov/genomes/all/GCF/001/411/555/GCF_001411555.1_wgs.5d	SAMN03704235	PRJNA350852	GCA_001411555.1	Scaffold	699.673	36.6		LIHL01	105803	2015-10-22T00:00:00Z	ftp://ftp.ncbi.nlm.nih.gov/genomes/all/GCA/001/411/555/GCA_001411555.1_wgs.5d
311	Juglans sigillata	ftp://ftp.ncbi.nlm.nih.gov/genomes/all/GCA/003/123/805/GCA_003123805.1_ASM312380v1	SAMN08795862	PRJNA445704	GCA_003123805.1	Scaffold	648.117	34.5		QEOY01	134300	2018-05-14T00:00:00Z	ftp://ftp.ncbi.nlm.nih.gov/genomes/all/GCA/003/123/805/GCA_003123805.1_ASM312380v1
312	Pterocarya stenoptera	ftp://ftp.ncbi.nlm.nih.gov/genomes/all/GCA/003/123/785/GCA_003123785.1_ASM312378v1	SAMN08795867	PRJNA445704	GCA_003123785.1	Scaffold	955.601	34.4		QEOT01	124315	2018-05-14T00:00:00Z	ftp://ftp.ncbi.nlm.nih.gov/genomes/all/GCA/003/123/785/GCA_003123785.1_ASM312378v1
313	Morella rubra	ftp://ftp.ncbi.nlm.nih.gov/genomes/all/GCA/003/952/965/GCA_003952965.1_Mru_ZJU_1.01	SAMN07510764	PRJNA398601	GCA_003952965.1	Chromosome	313.02	37.8335	linkage group LG1:CM012073.1; linkage group LG2:CM012074.1; linkage group LG3:CM012075.1; linkage group LG4:CM012076.1; linkage group LG5:CM012077.1; linkage group LG6:CM012078.1; linkage group LG7:CM012079.1; linkage group LG8:CM012080.1	RXIC01	500	2018-12-17T00:00:00Z	ftp://ftp.ncbi.nlm.nih.gov/genomes/all/GCA/003/952/965/GCA_003952965.1_Mru_ZJU_1.01
314	Punica granatum	ftp://ftp.ncbi.nlm.nih.gov/genomes/all/GCA/002/201/585/GCA_002201585.1_ASM220158v1	SAMN06227009	PRJNA360679	GCA_002201585.1	Scaffold	296.383	38.5		MTKT01	17405	2017-06-20T00:00:00Z	ftp://ftp.ncbi.nlm.nih.gov/genomes/all/GCA/002/201/585/GCA_002201585.1_ASM220158v1
315	Eucalyptus camaldulensis	ftp://ftp.ncbi.nlm.nih.gov/genomes/all/GCA/000/260/855/GCA_000260855.1_EUC_r1.0	SAMD00010821	PRJDA71141	GCA_000260855.1	Contig	654.922	39.2		BADO01	274001	2012-01-21T00:00:00Z	ftp://ftp.ncbi.nlm.nih.gov/genomes/all/GCA/000/260/855/GCA_000260855.1_EUC_r1.0
316	Eucalyptus grandis	ftp://ftp.ncbi.nlm.nih.gov/genomes/all/GCF/000/612/305/GCF_000612305.1_Egrandis1_0	SAMN02230419	PRJNA49047	GCA_000612305.1	Scaffold	691.43	39.9993	chloroplast Pltd:NC_014570.1/	AUSX01	4951	2014-04-02T00:00:00Z	ftp://ftp.ncbi.nlm.nih.gov/genomes/all/GCA/000/612/305/GCA_000612305.1_Egrandis1_0
317	Eucalyptus melliodora	ftp://ftp.ncbi.nlm.nih.gov/genomes/all/GCA/004/368/105/GCA_004368105.1_ASM436810v1	SAMN10587502	PRJNA509734	GCA_004368105.1	Scaffold	643.228	38.9		SISH01	423	2019-03-25T00:00:00Z	ftp://ftp.ncbi.nlm.nih.gov/genomes/all/GCA/004/368/105/GCA_004368105.1_ASM436810v1
318	Eucalyptus pauciflora	ftp://ftp.ncbi.nlm.nih.gov/genomes/all/GCA/007/663/325/GCA_007663325.1_ASM766332v1	SAMN11842900	PRJNA450887	GCA_007663325.1	Scaffold	594.528	39.4		VMYD01	415	2019-07-30T00:00:00Z	ftp://ftp.ncbi.nlm.nih.gov/genomes/all/GCA/007/663/325/GCA_007663325.1_ASM766332v1
319	Gossypium darwinii	ftp://ftp.ncbi.nlm.nih.gov/genomes/all/GCA/007/990/325/GCA_007990325.1_Gossypium_darwinii_v1.1	SAMN10884649	PRJNA516409	GCA_007990325.1	Chromosome	2182.96	34.1432	chromosome A01:CM017688.1; chromosome A02:CM017689.1; chromosome A03:CM017690.1; chromosome A04:CM017691.1; chromosome A05:CM017692.1; chromosome A06:CM017693.1; chromosome A07:CM017694.1; chromosome A08:CM017695.1; chromosome A09:CM017696.1; chromosome A10:CM017697.1; chromosome A11:CM017698.1; chromosome A12:CM017699.1; chromosome A13:CM017700.1; chromosome D01:CM017701.1; chromosome D02:CM0177…	VKGI01	821	2019-08-12T00:00:00Z	ftp://ftp.ncbi.nlm.nih.gov/genomes/all/GCA/007/990/325/GCA_007990325.1_Gossypium_darwinii_v1.1
320	Gossypium mustelinum	ftp://ftp.ncbi.nlm.nih.gov/genomes/all/GCA/007/990/455/GCA_007990455.1_Gossypium_mustelinum_v1.1	SAMN11110849	PRJNA525892	GCA_007990455.1	Chromosome	2315.09	34.506	chromosome A01:CM017636.1; chromosome A02:CM017637.1; chromosome A03:CM017638.1; chromosome A04:CM017639.1; chromosome A05:CM017640.1; chromosome A06:CM017641.1; chromosome A07:CM017642.1; chromosome A08:CM017643.1; chromosome A09:CM017644.1; chromosome A10:CM017645.1; chromosome A11:CM017646.1; chromosome A12:CM017647.1; chromosome A13:CM017648.1; chromosome D01:CM017649.1; chromosome D02:CM0176…	VKGF01	2146	2019-08-12T00:00:00Z	ftp://ftp.ncbi.nlm.nih.gov/genomes/all/GCA/007/990/455/GCA_007990455.1_Gossypium_mustelinum_v1.1
321	Gossypium tomentosum	ftp://ftp.ncbi.nlm.nih.gov/genomes/all/GCA/007/990/485/GCA_007990485.1_Gossypium_tomentosum_v1.1	SAMN11289623	PRJNA516412	GCA_007990485.1	Chromosome	2193.56	34.218	chromosome A01:CM017610.1; chromosome A02:CM017611.1; chromosome A03:CM017612.1; chromosome A04:CM017613.1; chromosome A05:CM017614.1; chromosome A06:CM017615.1; chromosome A07:CM017616.1; chromosome A08:CM017617.1; chromosome A09:CM017618.1; chromosome A10:CM017619.1; chromosome A11:CM017620.1; chromosome A12:CM017621.1; chromosome A13:CM017622.1; chromosome D01:CM017623.1; chromosome D02:CM0176…	VKGE01	749	2019-08-12T00:00:00Z	ftp://ftp.ncbi.nlm.nih.gov/genomes/all/GCA/007/990/485/GCA_007990485.1_Gossypium_tomentosum_v1.1
322	Gossypium turneri	ftp://ftp.ncbi.nlm.nih.gov/genomes/all/GCA/008/044/935/GCA_008044935.1_ASM804493v1	SAMN10135581	PRJNA493521	GCA_008044935.1	Chromosome	755.203	33.2104	chromosome D10_01:CP032571.1; chromosome D10_02:CP032572.1; chromosome D10_03:CP032573.1; chromosome D10_04:CP032574.1; chromosome D10_05:CP032575.1; chromosome D10_06:CP032576.1; chromosome D10_07:CP032577.1; chromosome D10_08:CP032578.1; chromosome D10_09:CP032579.1; chromosome D10_10:CP032580.1; chromosome D10_11:CP032581.1; chromosome D10_12:CP032582.1; chromosome D10_13:CP032583.1		13	2019-08-21T00:00:00Z	ftp://ftp.ncbi.nlm.nih.gov/genomes/all/GCA/008/044/935/GCA_008044935.1_ASM804493v1
323	Metrosideros polymorpha	ftp://ftp.ncbi.nlm.nih.gov/genomes/all/GCA/001/662/345/GCA_001662345.1_Mpo_1.0	SAMD00044343	PRJDB4221	GCA_001662345.1	Scaffold	304.366	38.3		BCNH01	36376	2016-04-28T00:00:00Z
324	Rhodamnia argentea	ftp://ftp.ncbi.nlm.nih.gov/genomes/all/GCF/900/635/035/GCF_900635035.1_Rarg10x-PRISCAF	SAMEA5186523	PRJEB30444	GCA_900635035.1	Scaffold	414.816	40.9		CAAAGQ01	15781	2019-02-07T07:36:00Z	ftp://ftp.ncbi.nlm.nih.gov/genomes/all/GCA/900/635/035/GCA_900635035.1_Rarg10x-PRISCAF
325	Eugenia uniflora	ftp://ftp.ncbi.nlm.nih.gov/genomes/all/GCA/004/012/085/GCA_004012085.1_ASM401208v1	SAMN10397313	PRJNA504673	GCA_004012085.1	Contig	3.15213	41.2		RQIG01	2601	2019-01-11T00:00:00Z	ftp://ftp.ncbi.nlm.nih.gov/genomes/all/GCA/004/012/085/GCA_004012085.1_ASM401208v1
326	Psidium guajava	ftp://ftp.ncbi.nlm.nih.gov/genomes/all/GCA/002/914/565/GCA_002914565.1_Guava1.0	SAMN07608042	PRJNA401640	GCA_002914565.1	Contig	386.852	39.3		NTGF01	4728	2018-02-02T00:00:00Z	ftp://ftp.ncbi.nlm.nih.gov/genomes/all/GCA/002/914/565/GCA_002914565.1_Guava1.0
327	Syzygium oleosum	ftp://ftp.ncbi.nlm.nih.gov/genomes/all/GCA/900/635/055/GCA_900635055.1_Sole10x-PRISCAF	SAMEA5186524	PRJEB30445	GCA_900635055.1	Scaffold	431.291	41.6		CAAAGS01	19039	2019-02-07T07:48:00Z	ftp://ftp.ncbi.nlm.nih.gov/genomes/all/GCA/900/635/055/GCA_900635055.1_Sole10x-PRISCAF
328	Pistacia vera	ftp://ftp.ncbi.nlm.nih.gov/genomes/all/GCA/008/641/045/GCA_008641045.1_PisVer_v2	SAMN11269074	PRJNA578116	GCA_008641045.1	Scaffold	671.28	36.0005	plastid Pltd:NC_034998.1/	VTWI01	1865	2019-09-23T00:00:00Z	ftp://ftp.ncbi.nlm.nih.gov/genomes/all/GCA/008/641/045/GCA_008641045.1_PisVer_v2
329	Azadirachta indica	ftp://ftp.ncbi.nlm.nih.gov/genomes/all/GCA/000/439/995/GCA_000439995.3_AzaInd2.1	SAMN02715695	PRJNA176672	GCA_000439995.3	Contig	261.458	43.2		AMWY02	126142	2013-07-25T00:00:00Z	ftp://ftp.ncbi.nlm.nih.gov/genomes/all/GCA/000/439/995/GCA_000439995.3_AzaInd2.1
330	Atalantia buxifolia	ftp://ftp.ncbi.nlm.nih.gov/genomes/all/GCA/002/013/935/GCA_002013935.1_ASM201393v1	SAMN05770693	PRJNA327148	GCA_002013935.1	Scaffold	315.806	30.7		MKYR01	25600	2017-03-03T00:00:00Z	ftp://ftp.ncbi.nlm.nih.gov/genomes/all/GCA/002/013/935/GCA_002013935.1_ASM201393v1
331	Citrus cavaleriei	ftp://ftp.ncbi.nlm.nih.gov/genomes/all/GCA/002/013/975/GCA_002013975.2_ASM201397v2	SAMN05519344	PRJNA321657	GCA_002013975.2	Scaffold	357.621	32.1		MKYP02	14916	2017-03-03T00:00:00Z	ftp://ftp.ncbi.nlm.nih.gov/genomes/all/GCA/002/013/975/GCA_002013975.2_ASM201397v2
332	Citrus clementina	ftp://ftp.ncbi.nlm.nih.gov/genomes/all/GCF/000/493/195/GCF_000493195.1_Citrus_clementina_v1.0	SAMN02389527	PRJNA223006	GCA_000493195.1	Scaffold	301.365	35.2		AMZM01	1398	2013-10-30T00:00:00Z	ftp://ftp.ncbi.nlm.nih.gov/genomes/all/GCA/000/493/195/GCA_000493195.1_Citrus_clementina_v1.0
333	Citrus hindsii	ftp://ftp.ncbi.nlm.nih.gov/genomes/all/GCA/004/802/465/GCA_004802465.1_ASM480246v1	SAMN09874947	PRJNA487160	GCA_004802465.1	Contig	373.17	34.5		QWBT01	1331	2019-04-22T00:00:00Z	ftp://ftp.ncbi.nlm.nih.gov/genomes/all/GCA/004/802/465/GCA_004802465.1_ASM480246v1
334	Citrus maxima	ftp://ftp.ncbi.nlm.nih.gov/genomes/all/GCA/002/006/925/GCA_002006925.1_ASM200692v1	SAMN04901528	PRJNA318855	GCA_002006925.1	Chromosome	345.757	34.9872	chromosome 1:CM007748.1; chromosome 2:CM007749.1; chromosome 3:CM007750.1; chromosome 4:CM007751.1; chromosome 5:CM007752.1; chromosome 6:CM007753.1; chromosome 7:CM007754.1; chromosome 8:CM007755.1; chromosome 9:CM007756.1	MKYQ01	1612	2017-02-24T00:00:00Z	ftp://ftp.ncbi.nlm.nih.gov/genomes/all/GCA/002/006/925/GCA_002006925.1_ASM200692v1
335	Citrus medica	ftp://ftp.ncbi.nlm.nih.gov/genomes/all/GCA/002/013/955/GCA_002013955.2_C_medica_denovo_2	SAMN04914485	PRJNA320023	GCA_002013955.2	Scaffold	406.058	0		MKYO02	32732	2017-03-03T00:00:00Z	ftp://ftp.ncbi.nlm.nih.gov/genomes/all/GCA/002/013/955/GCA_002013955.2_C_medica_denovo_2
336	Citrus reticulata	ftp://ftp.ncbi.nlm.nih.gov/genomes/all/GCA/003/258/625/GCA_003258625.1_ASM325862v1	SAMN07176221	PRJNA388397	GCA_003258625.1	Scaffold	344.273	33.9		NIHA01	67725	2018-06-20T00:00:00Z	ftp://ftp.ncbi.nlm.nih.gov/genomes/all/GCA/003/258/625/GCA_003258625.1_ASM325862v1
337	Citrus sinensis	ftp://ftp.ncbi.nlm.nih.gov/genomes/all/GCF/000/317/415/GCF_000317415.1_Csi_valencia_1.0	SAMN02981414	PRJNA225998	GCA_000317415.1	Chromosome	327.83	35.3314	chromosome 1:NC_023046.1/CM001701.1; chromosome 2:NC_023047.1/CM001702.1; chromosome 3:NC_023048.1/CM001703.1; chromosome 4:NC_023049.1/CM001704.1; chromosome 5:NC_023050.1/CM001705.1; chromosome 6:NC_023051.1/CM001706.1; chromosome 7:NC_023052.1/CM001707.1; chromosome 8:NC_023053.1/CM001708.1; chromosome 9:NC_023054.1/CM001709.1; chloroplast Pltd:NC_008334.1/	AJPS01	4995	2012-09-18T00:00:00Z	ftp://ftp.ncbi.nlm.nih.gov/genomes/all/GCA/000/317/415/GCA_000317415.1_Csi_valencia_1.0
338	Citrus unshiu	ftp://ftp.ncbi.nlm.nih.gov/genomes/all/GCA/002/897/195/GCA_002897195.1_CUMW_v1.0	SAMD00083908	PRJDB5882	GCA_002897195.1	Scaffold	359.652	31.3		BDQV01	20876	2017-12-06T00:00:00Z	ftp://ftp.ncbi.nlm.nih.gov/genomes/all/GCA/002/897/195/GCA_002897195.1_CUMW_v1.0
339	Citrus x paradisi x Citrus trifoliata	ftp://ftp.ncbi.nlm.nih.gov/genomes/all/GCA/001/929/425/GCA_001929425.1_WD23_11_assembly_v1	SAMN02393795	PRJNA224728	GCA_001929425.1	Contig	265.534	34.4		AZHM01	238488	2017-01-03T00:00:00Z	ftp://ftp.ncbi.nlm.nih.gov/genomes/all/GCA/001/929/425/GCA_001929425.1_WD23_11_assembly_v1
340	Acer yangbiense	ftp://ftp.ncbi.nlm.nih.gov/genomes/all/GCA/008/009/225/GCA_008009225.1_AYv1.1	SAMN11026391	PRJNA524417	GCA_008009225.1	Chromosome	665.888	35.9704	chromosome 1:CM017761.1; chromosome 2:CM017762.1; chromosome 3:CM017763.1; chromosome 4:CM017764.1; chromosome 5:CM017765.1; chromosome 6:CM017766.1; chromosome 7:CM017767.1; chromosome 8:CM017768.1; chromosome 9:CM017769.1; chromosome 10:CM017770.1; chromosome 11:CM017771.1; chromosome 12:CM017772.1; chromosome 13:CM017773.1; mitochondrion MT:CM017774.1; chloroplast Pltd:CM017775.1	VAHF01	280	2019-08-19T00:00:00Z	ftp://ftp.ncbi.nlm.nih.gov/genomes/all/GCA/008/009/225/GCA_008009225.1_AYv1.1
341	Xanthoceras sorbifolium	ftp://ftp.ncbi.nlm.nih.gov/genomes/all/GCA/003/430/845/GCA_003430845.1_ASM343084v1	SAMN09748200	PRJNA483857	GCA_003430845.1	Chromosome	504.383	34.9864	linkage group LG1:CM010608.1; linkage group LG10:CM010609.1; linkage group LG11:CM010610.1; linkage group LG12:CM010611.1; linkage group LG13:CM010612.1; linkage group LG14:CM010613.1; linkage group LG15:CM010614.1; linkage group LG2:CM010615.1; linkage group LG3:CM010616.1; linkage group LG4:CM010617.1; linkage group LG5:CM010618.1; linkage group LG6:CM010619.1; linkage group LG7:CM010620.1; lin…	QUWJ01	2297	2018-08-28T00:00:00Z	ftp://ftp.ncbi.nlm.nih.gov/genomes/all/GCA/003/430/845/GCA_003430845.1_ASM343084v1
342	Herrania umbratica	ftp://ftp.ncbi.nlm.nih.gov/genomes/all/GCF/002/168/275/GCF_002168275.1_ASM216827v2	SAMN06806157	PRJNA389730	GCA_002168275.2	Scaffold	234.039	33.9		NHTG01	6074	2017-06-05T00:00:00Z	ftp://ftp.ncbi.nlm.nih.gov/genomes/all/GCA/002/168/275/GCA_002168275.2_ASM216827v2
343	Theobroma cacao	ftp://ftp.ncbi.nlm.nih.gov/genomes/all/GCF/000/208/745/GCF_000208745.1_Criollo_cocoa_genome_V2	SAMEA4028428	PRJEB14326	GCA_000208745.2	Chromosome	324.88	34.9922	chromosome 1:NC_030850.1/LT594788.1; chromosome 2:NC_030851.1/LT594789.1; chromosome 3:NC_030852.1/LT594790.1; chromosome 4:NC_030853.1/LT594791.1; chromosome 5:NC_030854.1/LT594792.1; chromosome 6:NC_030855.1/LT594793.1; chromosome 7:NC_030856.1/LT594794.1; chromosome 8:NC_030857.1/LT594795.1; chromosome 9:NC_030858.1/LT594796.1; chromosome 10:NC_030859.1/LT594797.1; chloroplast Pltd:NC_014676.2/	FLSQ01	431	2016-07-08T00:00:00Z	ftp://ftp.ncbi.nlm.nih.gov/genomes/all/GCA/000/208/745/GCA_000208745.2_Criollo_cocoa_genome_V2
344	Corchorus capsularis	ftp://ftp.ncbi.nlm.nih.gov/genomes/all/GCA/001/974/805/GCA_001974805.1_CCACVL1_1.0	SAMN03290679	PRJNA215142	GCA_001974805.1	Scaffold	317.178	35.2		AWWV01	16522	2017-01-30T00:00:00Z	ftp://ftp.ncbi.nlm.nih.gov/genomes/all/GCA/001/974/805/GCA_001974805.1_CCACVL1_1.0
345	Corchorus olitorius	ftp://ftp.ncbi.nlm.nih.gov/genomes/all/GCA/001/974/825/GCA_001974825.1_COLO4_1.0	SAMN03160584	PRJNA215141	GCA_001974825.1	Contig	334.912	35.5		AWUE01	24918	2017-01-30T00:00:00Z	ftp://ftp.ncbi.nlm.nih.gov/genomes/all/GCA/001/974/825/GCA_001974825.1_COLO4_1.0
346	Durio zibethinus	ftp://ftp.ncbi.nlm.nih.gov/genomes/all/GCF/002/303/985/GCF_002303985.1_Duzib1.0	SAMN07563003	PRJNA407962	GCA_002303985.1	Scaffold	715.23	32.7		NSDW01	677	2017-09-15T00:00:00Z	ftp://ftp.ncbi.nlm.nih.gov/genomes/all/GCA/002/303/985/GCA_002303985.1_Duzib1.0
347	Gossypioides kirkii	ftp://ftp.ncbi.nlm.nih.gov/genomes/all/GCA/002/818/315/GCA_002818315.1_Gokir.v1	SAMN07842098	PRJNA400144	GCA_002818315.1	Chromosome	528.715	33.2725	chromosome 1:CM008980.1; chromosome 2:CM008981.1; chromosome 3:CM008982.1; chromosome 4:CM008983.1; chromosome 5:CM008984.1; chromosome 6:CM008985.1; chromosome 7:CM008986.1; chromosome 8:CM008987.1; chromosome 9:CM008988.1; chromosome 10:CM008989.1; chromosome 11:CM008990.1; chromosome 12:CM008991.1	PEQG01	745	2017-12-06T00:00:00Z	ftp://ftp.ncbi.nlm.nih.gov/genomes/all/GCA/002/818/315/GCA_002818315.1_Gokir.v1
348	Gossypium arboreum	ftp://ftp.ncbi.nlm.nih.gov/genomes/all/GCF/000/612/285/GCF_000612285.1_Gossypium_arboreum_v1.0	SAMN02981570	PRJNA335838	GCA_000612285.2	Chromosome	1694.6	36.1993	chromosome 1:NC_030664.1/CM002679.1; chromosome 2:NC_030665.1/CM002680.1; chromosome 3:NC_030666.1/CM002681.1; chromosome 4:NC_030667.1/CM002682.1; chromosome 5:NC_030668.1/CM002683.1; chromosome 6:NC_030669.1/CM002684.1; chromosome 7:NC_030670.1/CM002685.1; chromosome 8:NC_030671.1/CM002686.1; chromosome 9:NC_030672.1/CM002687.1; chromosome 10:NC_030673.1/CM002688.1; chromosome 11:NC_030674.1/CM…	AYOE01	75419	2014-03-31T00:00:00Z	ftp://ftp.ncbi.nlm.nih.gov/genomes/all/GCA/000/612/285/GCA_000612285.2_Gossypium_arboreum_v1.0
349	Gossypium barbadense	ftp://ftp.ncbi.nlm.nih.gov/genomes/all/GCA/001/856/525/GCA_001856525.1_GbV1.0	SAMN03433309	PRJNA219156	GCA_001856525.1	Scaffold	2566.74	35.8		AXCG01	29751	2016-10-28T00:00:00Z	ftp://ftp.ncbi.nlm.nih.gov/genomes/all/GCA/001/856/525/GCA_001856525.1_GbV1.0
350	Gossypium hirsutum	ftp://ftp.ncbi.nlm.nih.gov/genomes/all/GCF/000/987/745/GCF_000987745.1_ASM98774v1	SAMN03342414	PRJNA320881	GCA_000987745.1	Chromosome	2189.14	34.9006	chromosome 1:NC_030074.1/CM003250.1; chromosome 2:NC_030075.1/CM003251.1; chromosome 3:NC_030076.1/CM003252.1; chromosome 4:NC_030077.1/CM003253.1; chromosome 5:NC_030078.1/CM003254.1; chromosome 6:NC_030079.1/CM003255.1; chromosome 7:NC_030080.1/CM003256.1; chromosome 8:NC_030081.1/CM003257.1; chromosome 9:NC_030082.1/CM003258.1; chromosome 10:NC_030083.1/CM003259.1; chromosome 11:NC_030084.1/CM…	LBLM01	9148	2015-04-29T00:00:00Z	ftp://ftp.ncbi.nlm.nih.gov/genomes/all/GCA/000/987/745/GCA_000987745.1_ASM98774v1
351	Gossypium raimondii	ftp://ftp.ncbi.nlm.nih.gov/genomes/all/GCF/000/327/365/GCF_000327365.1_Graimondii2_0	SAMN02743920	PRJNA282644	GCA_000327365.1	Chromosome	761.565	33.5284	chromosome 1:NC_026929.1/CM001740.1; chromosome 2:NC_026930.1/CM001741.1; chromosome 3:NC_026931.1/CM001742.1; chromosome 4:NC_026932.1/CM001743.1; chromosome 5:NC_026933.1/CM001744.1; chromosome 6:NC_026934.1/CM001745.1; chromosome 7:NC_026935.1/CM001746.1; chromosome 8:NC_026936.1/CM001747.1; chromosome 9:NC_026937.1/CM001748.1; chromosome 10:NC_026938.1/CM001749.1; chromosome 11:NC_026939.1/CM…	ALYE01	1034	2012-12-20T00:00:00Z	ftp://ftp.ncbi.nlm.nih.gov/genomes/all/GCA/000/327/365/GCA_000327365.1_Graimondii2_0
352	Gossypium thurberi	ftp://ftp.ncbi.nlm.nih.gov/genomes/all/GCA/004/027/125/GCA_004027125.1_Gothu_v1	SAMN09928035	PRJNA488266	GCA_004027125.1	Chromosome	582.007	34.2402	chromosome 1:CM013378.1; chromosome 2:CM013379.1; chromosome 3:CM013380.1; chromosome 4:CM013381.1; chromosome 5:CM013382.1; chromosome 6:CM013383.1; chromosome 7:CM013384.1; chromosome 8:CM013385.1; chromosome 9:CM013386.1; chromosome 10:CM013387.1; chromosome 11:CM013388.1; chromosome 12:CM013389.1; chromosome 13:CM013390.1	RCOT01	15297	2018-12-28T00:00:00Z	ftp://ftp.ncbi.nlm.nih.gov/genomes/all/GCA/004/027/125/GCA_004027125.1_Gothu_v1
353	Hibiscus syriacus	ftp://ftp.ncbi.nlm.nih.gov/genomes/all/GCA/001/696/755/GCA_001696755.1_ASM169675v1	SAMN04961617	PRJNA320964	GCA_001696755.1	Scaffold	1748.25	0		MBGJ01	77488	2016-07-29T00:00:00Z	ftp://ftp.ncbi.nlm.nih.gov/genomes/all/GCA/001/696/755/GCA_001696755.1_ASM169675v1
354	Kokia drynarioides	ftp://ftp.ncbi.nlm.nih.gov/genomes/all/GCA/002/814/295/GCA_002814295.1_KokDry1	SAMN07559306	PRJNA400144	GCA_002814295.1	Scaffold	517.43	33		NTFQ01	15383	2017-12-08T00:00:00Z	ftp://ftp.ncbi.nlm.nih.gov/genomes/all/GCA/002/814/295/GCA_002814295.1_KokDry1
355	Aquilaria agallochum	ftp://ftp.ncbi.nlm.nih.gov/genomes/all/GCA/000/696/445/GCA_000696445.1_Aquilaria_agallocha_v1	SAMN02677707	PRJNA240626	GCA_000696445.1	Scaffold	726.71	37.5		JMHV01	27769	2014-05-29T00:00:00Z	ftp://ftp.ncbi.nlm.nih.gov/genomes/all/GCA/000/696/445/GCA_000696445.1_Aquilaria_agallocha_v1
356	Aquilaria sinensis	ftp://ftp.ncbi.nlm.nih.gov/genomes/all/GCA/005/392/925/GCA_005392925.1_SCBG_Asin_1.0	SAMN11080769	PRJNA525935	GCA_005392925.1	Contig	699.794	37.8		SMDT01	3368	2019-05-15T00:00:00Z	ftp://ftp.ncbi.nlm.nih.gov/genomes/all/GCA/005/392/925/GCA_005392925.1_SCBG_Asin_1.0
357	Aethionema arabicum	ftp://ftp.ncbi.nlm.nih.gov/genomes/all/GCA/000/411/095/GCA_000411095.1_VEGI_AA_v_1.0	SAMN02169162	PRJNA202984	GCA_000411095.1	Scaffold	192.488	36.2		ASZG01	18312	2013-06-12T00:00:00Z	ftp://ftp.ncbi.nlm.nih.gov/genomes/all/GCA/000/411/095/GCA_000411095.1_VEGI_AA_v_1.0
358	Arabis alpina	ftp://ftp.ncbi.nlm.nih.gov/genomes/all/GCA/900/128/785/GCA_900128785.1_MPIPZ.v5	SAMEA4527704	PRJEB16743	GCA_900128785.1	Chromosome	311.642	37.401	chromosome 1:LT669788.1; chromosome 2:LT669789.1; chromosome 3:LT669790.1; chromosome 4:LT669791.1; chromosome 5:LT669792.1; chromosome 6:LT669793.1; chromosome 7:LT669794.1; chromosome 8:LT669795.1		8	2016-12-31T00:00:00Z	ftp://ftp.ncbi.nlm.nih.gov/genomes/all/GCA/900/128/785/GCA_900128785.1_MPIPZ.v5
359	Arabis montbretiana	ftp://ftp.ncbi.nlm.nih.gov/genomes/all/GCA/001/484/125/GCA_001484125.1_ASM148412v1	SAMN02983095	PRJNA258048	GCA_001484125.1	Contig	199.12	35.8		LNCH01	28775	2016-01-04T00:00:00Z	ftp://ftp.ncbi.nlm.nih.gov/genomes/all/GCA/001/484/125/GCA_001484125.1_ASM148412v1
360	Arabis nordmanniana	ftp://ftp.ncbi.nlm.nih.gov/genomes/all/GCA/001/484/925/GCA_001484925.1_ASM148492v1	SAMN02983203	PRJNA258061	GCA_001484925.1	Scaffold	342.307	35		LNCG01	267228	2016-01-04T00:00:00Z	ftp://ftp.ncbi.nlm.nih.gov/genomes/all/GCA/001/484/925/GCA_001484925.1_ASM148492v1
361	Aurinia saxatilis	ftp://ftp.ncbi.nlm.nih.gov/genomes/all/GCA/900/406/295/GCA_900406295.1_Alyssum_saxatile	SAMEA4640837	PRJEB26555	GCA_900406295.1	Scaffold	316.42	36.6		OVAP01	76972	2019-06-13T00:00:00Z	ftp://ftp.ncbi.nlm.nih.gov/genomes/all/GCA/900/406/295/GCA_900406295.1_Alyssum_saxatile
362	Odontarrhena argentea	ftp://ftp.ncbi.nlm.nih.gov/genomes/all/GCA/900/406/245/GCA_900406245.1_Illumina_short-read_assembly_of_Alyssum_argenteum	SAMEA4639485	PRJEB26555	GCA_900406245.1	Scaffold	183.186	35.1		OVAF01	32097	2019-06-13T00:00:00Z	ftp://ftp.ncbi.nlm.nih.gov/genomes/all/GCA/900/406/245/GCA_900406245.1_Illumina_short-read_assembly_of_Alyssum_argenteum
363	Anastatica hierochuntica	ftp://ftp.ncbi.nlm.nih.gov/genomes/all/GCA/900/406/275/GCA_900406275.1_ASM90040627v1	SAMEA4640838	PRJEB26555	GCA_900406275.1	Scaffold	542.343	37.4		OVAN01	72649	2019-06-13T00:00:00Z	ftp://ftp.ncbi.nlm.nih.gov/genomes/all/GCA/900/406/275/GCA_900406275.1_ASM90040627v1
364	Biscutella auriculata	ftp://ftp.ncbi.nlm.nih.gov/genomes/all/GCA/900/406/285/GCA_900406285.1_ASM90040628v1	SAMEA4640839	PRJEB26555	GCA_900406285.1	Scaffold	384.77	33.9		OVAO01	150640	2019-06-13T00:00:00Z	ftp://ftp.ncbi.nlm.nih.gov/genomes/all/GCA/900/406/285/GCA_900406285.1_ASM90040628v1
365	Biscutella laevigata	ftp://ftp.ncbi.nlm.nih.gov/genomes/all/GCA/900/406/315/GCA_900406315.1_Biscutella_longifolia	SAMEA4643376	PRJEB26555	GCA_900406315.1	Scaffold	333.609	35		OVAU01	144912	2019-06-13T00:00:00Z
366	Boechera puberula	ftp://ftp.ncbi.nlm.nih.gov/genomes/all/GCA/900/406/335/GCA_900406335.1_ASM90040633v1	SAMEA4640840	PRJEB26555	GCA_900406335.1	Scaffold	182.592	34.9		OVAS01	123951	2019-06-13T00:00:00Z	ftp://ftp.ncbi.nlm.nih.gov/genomes/all/GCA/900/406/335/GCA_900406335.1_ASM90040633v1
367	Boechera stricta	ftp://ftp.ncbi.nlm.nih.gov/genomes/all/GCA/002/079/875/GCA_002079875.1_Bstricta_278_v1	SAMN04884537	PRJNA319286	GCA_002079875.1	Scaffold	188.795	30.9		MLHT01	1944	2017-04-05T00:00:00Z	ftp://ftp.ncbi.nlm.nih.gov/genomes/all/GCA/002/079/875/GCA_002079875.1_Bstricta_278_v1
368	Schrenkiella parvula	ftp://ftp.ncbi.nlm.nih.gov/genomes/all/GCA/000/218/505/GCA_000218505.1_Eutrema_parvulum_v01	SAMN00139339	PRJNA63667	GCA_000218505.1	Chromosome	137.073	35.7366	chromosome 1:CM001187.1; chromosome 2:CM001188.1; chromosome 3:CM001189.1; chromosome 4:CM001190.1; chromosome 5:CM001191.1; chromosome 6:CM001192.1; chromosome 7:CM001193.1	AFAN01	1463	2011-03-25T00:00:00Z	ftp://ftp.ncbi.nlm.nih.gov/genomes/all/GCA/000/218/505/GCA_000218505.1_Eutrema_parvulum_v01
369	Brassica cretica	ftp://ftp.ncbi.nlm.nih.gov/genomes/all/GCA/003/260/655/GCA_003260655.1_B_cretica_A_v2	SAMN09112366	PRJNA470925	GCA_003260655.1	Contig	412.521	36		QGKV01	243461	2018-06-22T00:00:00Z	ftp://ftp.ncbi.nlm.nih.gov/genomes/all/GCA/003/260/655/GCA_003260655.1_B_cretica_A_v2
370	Brassica juncea	ftp://ftp.ncbi.nlm.nih.gov/genomes/all/GCA/001/687/265/GCA_001687265.1_Brassica_juncea_var_tumida_T84-66_v1	SAMN03741772	PRJNA285130	GCA_001687265.1	Chromosome	954.861	37.3429	chromosome A1:CM007185.1; chromosome A2:CM007186.1; chromosome A3:CM007187.1; chromosome A4:CM007188.1; chromosome A5:CM007189.1; chromosome A6:CM007190.1; chromosome A7:CM007191.1; chromosome A8:CM007192.1; chromosome A9:CM007193.1; chromosome A10:CM007194.1; chromosome B1:CM007195.1; chromosome B2:CM007196.1; chromosome B3:CM007197.1; chromosome B4:CM007198.1; chromosome B5:CM007199.1; chromoso…	LFQT01	9746	2016-07-19T00:00:00Z
371	Brassica napus	ftp://ftp.ncbi.nlm.nih.gov/genomes/all/GCF/000/686/985/GCF_000686985.2_Bra_napus_v2.0	SAMN02742820	PRJNA293435	GCA_000686985.2	Chromosome	976.191	37.4074	chromosome A1:NC_027757.2/CM002759.2; chromosome A2:NC_027758.2/CM002760.2; chromosome A3:NC_027759.2/CM002761.2; chromosome A4:NC_027760.2/CM002762.2; chromosome A5:NC_027761.2/CM002763.2; chromosome A6:NC_027762.2/CM002764.2; chromosome A7:NC_027763.2/CM002765.2; chromosome A8:NC_027764.2/CM002766.2; chromosome A9:NC_027765.2/CM002767.2; chromosome A10:NC_027766.2/CM002768.2; chromosome C1:NC_0…	JMKK02	1471	2014-05-05T00:00:00Z	ftp://ftp.ncbi.nlm.nih.gov/genomes/all/GCA/000/686/985/GCA_000686985.2_Bra_napus_v2.0
372	Brassica nigra	ftp://ftp.ncbi.nlm.nih.gov/genomes/all/GCA/001/682/895/GCA_001682895.1_ASM168289v1	SAMN03742614	PRJNA285130	GCA_001682895.1	Chromosome	402.145	36.3207	chromosome B1:CM004491.1; chromosome B2:CM004492.1; chromosome B3:CM004493.1; chromosome B4:CM004494.1; chromosome B5:CM004495.1; chromosome B6:CM004496.1; chromosome B7:CM004497.1; chromosome B8:CM004498.1	LFLV01	2545	2016-07-10T00:00:00Z	ftp://ftp.ncbi.nlm.nih.gov/genomes/all/GCA/001/682/895/GCA_001682895.1_ASM168289v1
373	Brassica oleracea	ftp://ftp.ncbi.nlm.nih.gov/genomes/all/GCF/000/695/525/GCF_000695525.1_BOL	SAMN02584321	PRJNA293438	GCA_000695525.1	Chromosome	488.954	37.3348	chromosome C1:NC_027748.1/CM002784.1; chromosome C2:NC_027749.1/CM002785.1; chromosome C3:NC_027750.1/CM002786.1; chromosome C4:NC_027751.1/CM002787.1; chromosome C5:NC_027752.1/CM002788.1; chromosome C6:NC_027753.1/CM002789.1; chromosome C7:NC_027754.1/CM002790.1; chromosome C8:NC_027755.1/CM002791.1; chromosome C9:NC_027756.1/CM002792.1; mitochondrion:NC_016118.1/	JJMF01	32886	2014-05-22T00:00:00Z	ftp://ftp.ncbi.nlm.nih.gov/genomes/all/GCF/000/695/525/GCF_000695525.1_BOL
374	Brassica rapa	ftp://ftp.ncbi.nlm.nih.gov/genomes/all/GCF/000/309/985/GCF_000309985.1_Brapa_1.0	SAMN02981293	PRJNA59981	GCA_000309985.1	Chromosome	284.129	35.826	chromosome A1:NC_024795.1/; chromosome A2:NC_024796.1/; chromosome A3:NC_024797.1/; chromosome A4:NC_024798.1/; chromosome A5:NC_024799.1/; chromosome A6:NC_024800.1/; chromosome A7:NC_024801.1/; chromosome A8:NC_024802.1/; chromosome A9:NC_024803.1/; chromosome A10:NC_024804.1/; chloroplast Pltd:NC_015139.1/	AENI01	40432	2011-07-14T00:00:00Z	ftp://ftp.ncbi.nlm.nih.gov/genomes/all/GCA/000/309/985/GCA_000309985.1_Brapa_1.0
375	Erucastrum elatum	ftp://ftp.ncbi.nlm.nih.gov/genomes/all/GCA/900/406/325/GCA_900406325.1_ASM90040632v1	SAMEA4640843	PRJEB26555	GCA_900406325.1	Scaffold	362.114	34.6		OVBX01	80289	2019-06-13T00:00:00Z	ftp://ftp.ncbi.nlm.nih.gov/genomes/all/GCA/900/406/325/GCA_900406325.1_ASM90040632v1
376	Raphanus raphanistrum	ftp://ftp.ncbi.nlm.nih.gov/genomes/all/GCA/000/769/845/GCA_000769845.1_ASM76984v1	SAMN02213662	PRJNA209513	GCA_000769845.1	Contig	253.834	35		JRQH01	64732	2014-10-28T00:00:00Z
377	Raphanus sativus	ftp://ftp.ncbi.nlm.nih.gov/genomes/all/GCF/000/801/105/GCF_000801105.1_Rs1.0	SAMN03084390	PRJNA344915	GCA_000801105.2	Scaffold	426.614	37.2045	mitochondrion MT:NC_018551.1/; chloroplast Pltd:NC_024469.1/	JRUI02	10676	2014-12-12T00:00:00Z	ftp://ftp.ncbi.nlm.nih.gov/genomes/all/GCA/000/801/105/GCA_000801105.2_Rs1.0
378	Arabidopsis halleri	ftp://ftp.ncbi.nlm.nih.gov/genomes/all/GCA/900/078/215/GCA_900078215.1_Ahal2.2	SAMEA3885198	PRJEB12914	GCA_900078215.1	Scaffold	196.243	30.7		FJVB01	2239	2016-09-29T00:00:00Z
379	Arabidopsis lyrata	ftp://ftp.ncbi.nlm.nih.gov/genomes/all/GCF/000/004/255/GCF_000004255.2_v.1.0	SAMN02981250	PRJNA41137	GCA_000004255.1	Scaffold	206.823	37.5991	chloroplast Pltd:NC_034379.1/	ADBK01	696	2009-11-30T00:00:00Z	ftp://ftp.ncbi.nlm.nih.gov/genomes/all/GCF/000/004/255/GCF_000004255.2_v.1.0
380	Arabidopsis thaliana	ftp://ftp.ncbi.nlm.nih.gov/genomes/all/GCF/000/001/735/GCF_000001735.4_TAIR10.1	SAMN03081427	PRJNA10719	GCA_000001735.2	Chromosome	119.669	36.0529	chromosome 1:NC_003070.9/CP002684.1; chromosome 2:NC_003071.7/CP002685.1; chromosome 3:NC_003074.8/CP002686.1; chromosome 4:NC_003075.7/CP002687.1; chromosome 5:NC_003076.8/CP002688.1; mitochondrion MT:NC_037304.1/BK010421.1; chloroplast Pltd:NC_000932.1/AP000423.1		7	2001-08-13T00:00:00Z	ftp://ftp.ncbi.nlm.nih.gov/genomes/all/GCA/000/001/735/GCA_000001735.2_TAIR10.1
381	Camelina sativa	ftp://ftp.ncbi.nlm.nih.gov/genomes/all/GCF/000/633/955/GCF_000633955.1_Cs	SAMN02644653	PRJNA264159	GCA_000633955.1	Chromosome	641.356	37.4934	chromosome 1:NC_025685.1/CM002729.1; chromosome 2:NC_025686.1/CM002730.1; chromosome 3:NC_025687.1/CM002731.1; chromosome 4:NC_025688.1/CM002732.1; chromosome 5:NC_025689.1/CM002733.1; chromosome 6:NC_025690.1/CM002734.1; chromosome 7:NC_025691.1/CM002735.1; chromosome 8:NC_025692.1/CM002736.1; chromosome 9:NC_025693.1/CM002737.1; chromosome 10:NC_025694.1/CM002738.1; chromosome 11:NC_025695.1/CM…	JFZQ01	37212	2014-04-17T00:00:00Z	ftp://ftp.ncbi.nlm.nih.gov/genomes/all/GCA/000/633/955/GCA_000633955.1_Cs
382	Capsella bursa-pastoris	ftp://ftp.ncbi.nlm.nih.gov/genomes/all/GCA/001/974/645/GCA_001974645.1_C_bursa_pastoris_nuclear_genome_v1	SAMN05991519	PRJNA352734	GCA_001974645.1	Scaffold	268.431	33.4		MPGU01	8186	2017-01-29T00:00:00Z	ftp://ftp.ncbi.nlm.nih.gov/genomes/all/GCA/001/974/645/GCA_001974645.1_C_bursa_pastoris_nuclear_genome_v1
383	Capsella rubella	ftp://ftp.ncbi.nlm.nih.gov/genomes/all/GCF/000/375/325/GCF_000375325.1_Caprub1_0	SAMN02981483	PRJNA13878	GCA_000375325.1	Scaffold	133.064	35.9		ANNY01	773	2013-04-19T00:00:00Z	ftp://ftp.ncbi.nlm.nih.gov/genomes/all/GCA/000/375/325/GCA_000375325.1_Caprub1_0
384	Barbarea vulgaris	ftp://ftp.ncbi.nlm.nih.gov/genomes/all/GCA/001/920/985/GCA_001920985.1_ASM192098v1	SAMN04979170	PRJNA321292	GCA_001920985.1	Scaffold	167.352	0		LXTM01	7810	2016-12-23T00:00:00Z	ftp://ftp.ncbi.nlm.nih.gov/genomes/all/GCA/001/920/985/GCA_001920985.1_ASM192098v1
385	Leavenworthia alabamica	ftp://ftp.ncbi.nlm.nih.gov/genomes/all/GCA/000/411/055/GCA_000411055.1_VEGI_LA_v_1.0	SAMN02146679	PRJNA202983	GCA_000411055.1	Scaffold	173.432	35.4		ASXC01	11715	2013-06-12T00:00:00Z	ftp://ftp.ncbi.nlm.nih.gov/genomes/all/GCA/000/411/055/GCA_000411055.1_VEGI_LA_v_1.0
386	Nasturtium officinale	ftp://ftp.ncbi.nlm.nih.gov/genomes/all/GCA/900/406/445/GCA_900406445.1_ASM90040644v1	SAMEA4640853	PRJEB26555	GCA_900406445.1	Scaffold	216.122	35.1		OVAZ01	10793	2019-06-13T00:00:00Z	ftp://ftp.ncbi.nlm.nih.gov/genomes/all/GCA/900/406/445/GCA_900406445.1_ASM90040644v1
387	Noccaea caerulescens	ftp://ftp.ncbi.nlm.nih.gov/genomes/all/GCA/900/406/465/GCA_900406465.1_ASM90040646v1	SAMEA4640854	PRJEB26555	GCA_900406465.1	Scaffold	140.792	37		OVBC01	19808	2019-06-13T00:00:00Z	ftp://ftp.ncbi.nlm.nih.gov/genomes/all/GCA/900/406/465/GCA_900406465.1_ASM90040646v1
388	Noccaea goesingensis	ftp://ftp.ncbi.nlm.nih.gov/genomes/all/GCA/900/406/475/GCA_900406475.1_ASM90040647v1	SAMEA4640855	PRJEB26555	GCA_900406475.1	Scaffold	150.323	36		OVBG01	183017	2019-06-13T00:00:00Z	ftp://ftp.ncbi.nlm.nih.gov/genomes/all/GCA/900/406/475/GCA_900406475.1_ASM90040647v1
389	Raparia bulbosa	ftp://ftp.ncbi.nlm.nih.gov/genomes/all/GCA/900/406/535/GCA_900406535.1_ASM90040653v1	SAMEA4640861	PRJEB26555	GCA_900406535.1	Scaffold	152.784	36.9		OVBJ01	13874	2019-06-13T00:00:00Z	ftp://ftp.ncbi.nlm.nih.gov/genomes/all/GCA/900/406/535/GCA_900406535.1_ASM90040653v1
390	Conringia planisiliqua	ftp://ftp.ncbi.nlm.nih.gov/genomes/all/GCA/900/108/845/GCA_900108845.1_Conringia_planisiliqua.v1	SAMEA4523483	PRJEB16743	GCA_900108845.1	Scaffold	184.156	35.4		FNXX01	705	2016-12-31T00:00:00Z	ftp://ftp.ncbi.nlm.nih.gov/genomes/all/GCA/900/108/845/GCA_900108845.1_Conringia_planisiliqua.v1
391	Cochlearia officinalis	ftp://ftp.ncbi.nlm.nih.gov/genomes/all/GCA/900/406/305/GCA_900406305.1_ASM90040630v1	SAMEA4640841	PRJEB26555	GCA_900406305.1	Scaffold	164.469	32.9		OVAT01	128459	2019-06-13T00:00:00Z	ftp://ftp.ncbi.nlm.nih.gov/genomes/all/GCA/900/406/305/GCA_900406305.1_ASM90040630v1
392	Crucihimalaya himalaica	ftp://ftp.ncbi.nlm.nih.gov/genomes/all/GCA/004/349/715/GCA_004349715.1_ASM434971v1	SAMN10882650	PRJNA521295	GCA_004349715.1	Scaffold	234.721	35.8		SMJT01	582	2019-03-14T00:00:00Z	ftp://ftp.ncbi.nlm.nih.gov/genomes/all/GCA/004/349/715/GCA_004349715.1_ASM434971v1
393	Erysimum cheiri	ftp://ftp.ncbi.nlm.nih.gov/genomes/all/GCA/900/406/345/GCA_900406345.1_ASM90040634v1	SAMEA4640844	PRJEB26555	GCA_900406345.1	Scaffold	147.321	35.6		OVAQ01	37531	2019-06-13T00:00:00Z	ftp://ftp.ncbi.nlm.nih.gov/genomes/all/GCA/900/406/345/GCA_900406345.1_ASM90040634v1
394	Erysimum pusillum	ftp://ftp.ncbi.nlm.nih.gov/genomes/all/GCA/900/406/355/GCA_900406355.1_ASM90040635v1	SAMEA4640864	PRJEB26555	GCA_900406355.1	Scaffold	184.064	35		OVBW01	47441	2019-06-13T00:00:00Z	ftp://ftp.ncbi.nlm.nih.gov/genomes/all/GCA/900/406/355/GCA_900406355.1_ASM90040635v1
395	Euclidium syriacum	ftp://ftp.ncbi.nlm.nih.gov/genomes/all/GCA/900/116/095/GCA_900116095.1_Euclidium_syriacum.MPIPZ.v1	SAMEA4527703	PRJEB16743	GCA_900116095.1	Scaffold	229.211	35.4		FPAK01	160	2016-12-31T00:00:00Z	ftp://ftp.ncbi.nlm.nih.gov/genomes/all/GCA/900/116/095/GCA_900116095.1_Euclidium_syriacum.MPIPZ.v1
396	Eutrema heterophyllum	ftp://ftp.ncbi.nlm.nih.gov/genomes/all/GCA/002/933/915/GCA_002933915.1_ASM293391v1	SAMN08200758	PRJNA419026	GCA_002933915.1	Scaffold	348.971	37		PKMM01	57686	2018-02-20T00:00:00Z	ftp://ftp.ncbi.nlm.nih.gov/genomes/all/GCA/002/933/915/GCA_002933915.1_ASM293391v1
397	Eutrema salsugineum	ftp://ftp.ncbi.nlm.nih.gov/genomes/all/GCF/000/478/725/GCF_000478725.1_Eutsalg1_0	SAMN02981485	PRJNA73205	GCA_000478725.1	Scaffold	243.11	37.9		ANOA01	638	2013-10-22T00:00:00Z	ftp://ftp.ncbi.nlm.nih.gov/genomes/all/GCA/000/478/725/GCA_000478725.1_Eutsalg1_0
398	Eutrema yunnanense	ftp://ftp.ncbi.nlm.nih.gov/genomes/all/GCA/002/933/935/GCA_002933935.1_ASM293393v1	SAMN08200759	PRJNA419026	GCA_002933935.1	Scaffold	415.364	35.4		PKML01	78020	2018-02-20T00:00:00Z	ftp://ftp.ncbi.nlm.nih.gov/genomes/all/GCA/002/933/935/GCA_002933935.1_ASM293393v1
399	Heliophila coronopifolia	ftp://ftp.ncbi.nlm.nih.gov/genomes/all/GCA/900/406/365/GCA_900406365.1_ASM90040636v1	SAMEA4640845	PRJEB26555	GCA_900406365.1	Scaffold	293.602	30.8		OVAW01	212649	2019-06-13T00:00:00Z	ftp://ftp.ncbi.nlm.nih.gov/genomes/all/GCA/900/406/365/GCA_900406365.1_ASM90040636v1
400	Iberis amara	ftp://ftp.ncbi.nlm.nih.gov/genomes/all/GCA/900/406/375/GCA_900406375.1_ASM90040637v1	SAMEA4640846	PRJEB26555	GCA_900406375.1	Scaffold	361.245	33.5		OVAV01	191171	2019-06-13T00:00:00Z	ftp://ftp.ncbi.nlm.nih.gov/genomes/all/GCA/900/406/375/GCA_900406375.1_ASM90040637v1
401	Iberis pinnata	ftp://ftp.ncbi.nlm.nih.gov/genomes/all/GCA/900/406/425/GCA_900406425.1_ASM90040642v1	SAMEA4640847	PRJEB26555	GCA_900406425.1	Scaffold	686.283	35.2		OVBE01	141542	2019-06-13T00:00:00Z	ftp://ftp.ncbi.nlm.nih.gov/genomes/all/GCA/900/406/425/GCA_900406425.1_ASM90040642v1
402	Isatis lusitanica	ftp://ftp.ncbi.nlm.nih.gov/genomes/all/GCA/900/406/415/GCA_900406415.1_ASM90040641v1	SAMEA4640848	PRJEB26555	GCA_900406415.1	Scaffold	203.919	36.5		OVBB01	61090	2019-06-13T00:00:00Z	ftp://ftp.ncbi.nlm.nih.gov/genomes/all/GCA/900/406/415/GCA_900406415.1_ASM90040641v1
403	Isatis tinctoria	ftp://ftp.ncbi.nlm.nih.gov/genomes/all/GCA/900/406/385/GCA_900406385.1_ASM90040638v1	SAMEA4640849	PRJEB26555	GCA_900406385.1	Scaffold	244.177	36.1		OVBD01	106900	2019-06-13T00:00:00Z	ftp://ftp.ncbi.nlm.nih.gov/genomes/all/GCA/900/406/385/GCA_900406385.1_ASM90040638v1
404	Kernera saxatilis	ftp://ftp.ncbi.nlm.nih.gov/genomes/all/GCA/900/406/395/GCA_900406395.1_ASM90040639v1	SAMEA4640850	PRJEB26555	GCA_900406395.1	Scaffold	143.969	35.9		OVAY01	18372	2019-06-13T00:00:00Z	ftp://ftp.ncbi.nlm.nih.gov/genomes/all/GCA/900/406/395/GCA_900406395.1_ASM90040639v1
405	Lepidium africanum	ftp://ftp.ncbi.nlm.nih.gov/genomes/all/GCA/900/406/405/GCA_900406405.1_ASM90040640v1	SAMEA4640851	PRJEB26555	GCA_900406405.1	Scaffold	225.262	34.9		OVAX01	17445	2019-06-13T00:00:00Z	ftp://ftp.ncbi.nlm.nih.gov/genomes/all/GCA/900/406/405/GCA_900406405.1_ASM90040640v1
406	Lepidium aucheri	ftp://ftp.ncbi.nlm.nih.gov/genomes/all/GCA/900/406/435/GCA_900406435.1_ASM90040643v1	SAMEA4640863	PRJEB26555	GCA_900406435.1	Scaffold	332.063	35.4		OVBA01	31191	2019-06-13T00:00:00Z	ftp://ftp.ncbi.nlm.nih.gov/genomes/all/GCA/900/406/435/GCA_900406435.1_ASM90040643v1
407	Physaria acutifolia	ftp://ftp.ncbi.nlm.nih.gov/genomes/all/GCA/900/406/485/GCA_900406485.1_ASM90040648v1	SAMEA4640856	PRJEB26555	GCA_900406485.1	Scaffold	199.442	34.1		OVBH01	276837	2019-06-13T00:00:00Z	ftp://ftp.ncbi.nlm.nih.gov/genomes/all/GCA/900/406/485/GCA_900406485.1_ASM90040648v1
408	Physaria fendleri	ftp://ftp.ncbi.nlm.nih.gov/genomes/all/GCA/900/406/525/GCA_900406525.1_ASM90040652v1	SAMEA4640857	PRJEB26555	GCA_900406525.1	Scaffold	331.342	34.7		OVBV01	99932	2019-06-13T00:00:00Z	ftp://ftp.ncbi.nlm.nih.gov/genomes/all/GCA/900/406/525/GCA_900406525.1_ASM90040652v1
409	Physaria ovalifolia	ftp://ftp.ncbi.nlm.nih.gov/genomes/all/GCA/900/406/505/GCA_900406505.1_ASM90040650v1	SAMEA4640862	PRJEB26555	GCA_900406505.1	Scaffold	290.267	34.3		OVBY01	335399	2019-06-13T00:00:00Z	ftp://ftp.ncbi.nlm.nih.gov/genomes/all/GCA/900/406/505/GCA_900406505.1_ASM90040650v1
410	Sisymbrium altissimum	ftp://ftp.ncbi.nlm.nih.gov/genomes/all/GCA/900/406/495/GCA_900406495.1_ASM90040649v1	SAMEA4640859	PRJEB26555	GCA_900406495.1	Scaffold	178.647	35.9		OVBI01	14597	2019-06-13T00:00:00Z	ftp://ftp.ncbi.nlm.nih.gov/genomes/all/GCA/900/406/495/GCA_900406495.1_ASM90040649v1
411	Sisymbrium irio	ftp://ftp.ncbi.nlm.nih.gov/genomes/all/GCA/000/411/075/GCA_000411075.1_VEGI_SI_v_1.0	SAMN02152446	PRJNA202979	GCA_000411075.1	Scaffold	245.55	38		ASZH01	21357	2013-06-13T00:00:00Z	ftp://ftp.ncbi.nlm.nih.gov/genomes/all/GCA/000/411/075/GCA_000411075.1_VEGI_SI_v_1.0
412	Macropodium nivale	ftp://ftp.ncbi.nlm.nih.gov/genomes/all/GCA/900/406/455/GCA_900406455.1_ASM90040645v1	SAMEA4640852	PRJEB26555	GCA_900406455.1	Scaffold	300.735	37.9		OVBF01	122604	2019-06-13T00:00:00Z	ftp://ftp.ncbi.nlm.nih.gov/genomes/all/GCA/900/406/455/GCA_900406455.1_ASM90040645v1
413	Pseudoturritis turrita	ftp://ftp.ncbi.nlm.nih.gov/genomes/all/GCA/900/406/555/GCA_900406555.1_ASM90040655v1	SAMEA4643371	PRJEB26555	GCA_900406555.1	Contig	321.563	37.4		OVBL01	1111	2019-06-13T00:00:00Z	ftp://ftp.ncbi.nlm.nih.gov/genomes/all/GCA/900/406/555/GCA_900406555.1_ASM90040655v1
414	Turritis glabra	ftp://ftp.ncbi.nlm.nih.gov/genomes/all/GCA/900/406/565/GCA_900406565.1_ASM90040656v1	SAMEA4643370	PRJEB26555	GCA_900406565.1	Contig	171.13	36		OVBN01	250	2019-06-13T00:00:00Z	ftp://ftp.ncbi.nlm.nih.gov/genomes/all/GCA/900/406/565/GCA_900406565.1_ASM90040656v1
415	Thlaspi arvense	ftp://ftp.ncbi.nlm.nih.gov/genomes/all/GCA/000/956/625/GCA_000956625.1_T_arvense_v1	SAMN02374852	PRJNA222676	GCA_000956625.1	Scaffold	343.012	38.5		AZNP01	6768	2015-03-19T00:00:00Z	ftp://ftp.ncbi.nlm.nih.gov/genomes/all/GCA/000/956/625/GCA_000956625.1_T_arvense_v1
416	Carica papaya	ftp://ftp.ncbi.nlm.nih.gov/genomes/all/GCF/000/150/535/GCF_000150535.2_Papaya1.0	SAMN02953710	PRJNA20267	GCA_000150535.1	Scaffold	370.419	39.0069	mitochondrion MT:NC_012116.1/; chloroplast Pltd:NC_010323.1/	ABIM01	17766	2008-04-23T00:00:00Z	ftp://ftp.ncbi.nlm.nih.gov/genomes/all/GCA/000/150/535/GCA_000150535.1_Papaya1.0
417	Tarenaya hassleriana	ftp://ftp.ncbi.nlm.nih.gov/genomes/all/GCF/000/463/585/GCF_000463585.1_ASM46358v1	SAMN02981509	PRJNA175230	GCA_000463585.1	Scaffold	249.93	40.5		AOUI01	12249	2013-09-03T00:00:00Z	ftp://ftp.ncbi.nlm.nih.gov/genomes/all/GCA/000/463/585/GCA_000463585.1_ASM46358v1
418	Santalum album	ftp://ftp.ncbi.nlm.nih.gov/genomes/all/GCA/002/911/635/GCA_002911635.1_ASM291163v1	SAMN07690435	PRJNA411901	GCA_002911635.1	Contig	196.101	36.5		NXEK01	180	2018-02-01T00:00:00Z	ftp://ftp.ncbi.nlm.nih.gov/genomes/all/GCA/002/911/635/GCA_002911635.1_ASM291163v1
419	Amaranthus hypochondriacus	ftp://ftp.ncbi.nlm.nih.gov/genomes/all/GCA/000/753/965/GCA_000753965.1_AHP_1.0	SAMN02315103	PRJNA214803	GCA_000753965.1	Scaffold	502.148	42.2		JPXE01	117340	2014-09-09T00:00:00Z	ftp://ftp.ncbi.nlm.nih.gov/genomes/all/GCA/000/753/965/GCA_000753965.1_AHP_1.0
420	Amaranthus tuberculatus	ftp://ftp.ncbi.nlm.nih.gov/genomes/all/GCA/000/180/655/GCA_000180655.1_ASM18065v1	SAMN00008865	PRJNA38543	GCA_000180655.1	Contig	4.34798	35		ACQK01	15440	2009-06-22T00:00:00Z	ftp://ftp.ncbi.nlm.nih.gov/genomes/all/GCA/000/180/655/GCA_000180655.1_ASM18065v1
421	Carnegiea gigantea	ftp://ftp.ncbi.nlm.nih.gov/genomes/all/GCA/002/740/515/GCA_002740515.1_SGP5_Cgig_v1.3	SAMN04868325	PRJNA318822	GCA_002740515.1	Scaffold	980.351	36.1		NCQR01	57405	2017-10-31T00:00:00Z	ftp://ftp.ncbi.nlm.nih.gov/genomes/all/GCA/002/740/515/GCA_002740515.1_SGP5_Cgig_v1.3
422	Lophocereus schottii	ftp://ftp.ncbi.nlm.nih.gov/genomes/all/GCA/002/740/545/GCA_002740545.1_Lsch_v1.3	SAMN06196470	PRJNA318822	GCA_002740545.1	Scaffold	797.926	35.9		NCQV01	158704	2017-10-31T00:00:00Z	ftp://ftp.ncbi.nlm.nih.gov/genomes/all/GCA/002/740/545/GCA_002740545.1_Lsch_v1.3
423	Pachycereus pringlei	ftp://ftp.ncbi.nlm.nih.gov/genomes/all/GCA/002/740/445/GCA_002740445.1_Ppri_v1.3	SAMN06196469	PRJNA318822	GCA_002740445.1	Scaffold	629.656	34.5		NCQS01	171584	2017-10-31T00:00:00Z	ftp://ftp.ncbi.nlm.nih.gov/genomes/all/GCA/002/740/445/GCA_002740445.1_Ppri_v1.3
424	Stenocereus thurberi	ftp://ftp.ncbi.nlm.nih.gov/genomes/all/GCA/002/740/465/GCA_002740465.1_Sthu_v1.3	SAMN06196471	PRJNA318822	GCA_002740465.1	Scaffold	853.348	35.9		NCQT01	159477	2017-10-31T00:00:00Z	ftp://ftp.ncbi.nlm.nih.gov/genomes/all/GCA/002/740/465/GCA_002740465.1_Sthu_v1.3
425	Pereskia humboldtii	ftp://ftp.ncbi.nlm.nih.gov/genomes/all/GCA/002/740/485/GCA_002740485.1_Phum_v1.3	SAMN06196472	PRJNA318822	GCA_002740485.1	Scaffold	414.047	35.2		NCQU01	126352	2017-10-31T00:00:00Z	ftp://ftp.ncbi.nlm.nih.gov/genomes/all/GCA/002/740/485/GCA_002740485.1_Phum_v1.3
426	Dianthus caryophyllus	ftp://ftp.ncbi.nlm.nih.gov/genomes/all/GCA/000/512/335/GCA_000512335.1_DCA_r1.0	SAMD00012316	PRJDB1491	GCA_000512335.1	Scaffold	567.662	37.8		BAUD01	45088	2013-12-18T00:00:00Z	ftp://ftp.ncbi.nlm.nih.gov/genomes/all/GCA/000/512/335/GCA_000512335.1_DCA_r1.0
427	Silene latifolia	ftp://ftp.ncbi.nlm.nih.gov/genomes/all/GCA/003/260/165/GCA_003260165.1_S_latifolia_v1.0	SAMN08893761	PRJNA448569	GCA_003260165.1	Scaffold	1185.09	28.8		QBIE01	319506	2018-06-22T00:00:00Z	ftp://ftp.ncbi.nlm.nih.gov/genomes/all/GCA/003/260/165/GCA_003260165.1_S_latifolia_v1.0
428	Beta vulgaris	ftp://ftp.ncbi.nlm.nih.gov/genomes/all/GCF/000/511/025/GCF_000511025.2_RefBeet-1.2.2	SAMN02182557	PRJNA41497	GCA_000511025.2	Chromosome	566.55	37.305	chromosome 1:NC_025812.2/CM002321.2; chromosome 2:NC_025813.2/CM002322.2; chromosome 3:NC_025814.2/CM002323.2; chromosome 4:NC_025815.2/CM002324.2; chromosome 5:NC_025816.2/CM002325.2; chromosome 6:NC_025817.2/CM002326.2; chromosome 7:NC_025818.2/CM002327.2; chromosome 8:NC_025819.2/CM002328.2; chromosome 9:NC_025820.2/CM002329.2; mitochondrion MT:NC_002511.2/	AYZS02	40406	2013-12-18T00:00:00Z	ftp://ftp.ncbi.nlm.nih.gov/genomes/all/GCF/000/511/025/GCF_000511025.2_RefBeet-1.2.2
429	Beta patula	ftp://ftp.ncbi.nlm.nih.gov/genomes/all/GCA/005/862/465/GCA_005862465.1_Bpat-1.0.1	SAMN11125680	PRJNA527013	GCA_005862465.1	Scaffold	633.549	25		VASJ01	78458	2019-05-28T00:00:00Z	ftp://ftp.ncbi.nlm.nih.gov/genomes/all/GCA/005/862/465/GCA_005862465.1_Bpat-1.0.1
430	Bassia scoparia	ftp://ftp.ncbi.nlm.nih.gov/genomes/all/GCA/008/642/245/GCA_008642245.1_CSU_KoSco_1.0	SAMN11099549	PRJNA526487	GCA_008642245.1	Scaffold	711.357	32.9		SNQN01	19671	2019-09-23T00:00:00Z	ftp://ftp.ncbi.nlm.nih.gov/genomes/all/GCA/008/642/245/GCA_008642245.1_CSU_KoSco_1.0
431	Spinacia oleracea	ftp://ftp.ncbi.nlm.nih.gov/genomes/all/GCF/002/007/265/GCF_002007265.1_ASM200726v1	SAMN05242642	PRJNA396054	GCA_002007265.1	Scaffold	869.946	38.3997	plastid Pltd:NC_002202.1/	LZYP01	78263	2017-02-27T00:00:00Z	ftp://ftp.ncbi.nlm.nih.gov/genomes/all/GCA/002/007/265/GCA_002007265.1_ASM200726v1
432	Chenopodium pallidicaule	ftp://ftp.ncbi.nlm.nih.gov/genomes/all/GCA/001/687/005/GCA_001687005.1_ASM168700v1	SAMN05271594	PRJNA326220	GCA_001687005.1	Scaffold	337.011	35.7		MATR01	3013	2016-07-18T00:00:00Z	ftp://ftp.ncbi.nlm.nih.gov/genomes/all/GCA/001/687/005/GCA_001687005.1_ASM168700v1
433	Chenopodium quinoa	ftp://ftp.ncbi.nlm.nih.gov/genomes/all/GCF/001/683/475/GCF_001683475.1_ASM168347v1	SAMN04338310	PRJNA394242	GCA_001683475.1	Scaffold	1333.55	37	chloroplast Pltd:NC_034949.1/	LPWI01	3487	2016-07-11T00:00:00Z	ftp://ftp.ncbi.nlm.nih.gov/genomes/all/GCA/001/683/475/GCA_001683475.1_ASM168347v1
434	Chenopodium suecicum	ftp://ftp.ncbi.nlm.nih.gov/genomes/all/GCA/001/687/025/GCA_001687025.1_ASM168702v1	SAMN05271586	PRJNA326219	GCA_001687025.1	Scaffold	536.949	33.3		MATQ01	11198	2016-07-18T00:00:00Z	ftp://ftp.ncbi.nlm.nih.gov/genomes/all/GCA/001/687/025/GCA_001687025.1_ASM168702v1
435	Drosera capensis	ftp://ftp.ncbi.nlm.nih.gov/genomes/all/GCA/001/925/005/GCA_001925005.1_ASM192500v1	SAMN03951121	PRJNA291419	GCA_001925005.1	Scaffold	263.788	0		LIEC01	12713	2016-12-30T00:00:00Z	ftp://ftp.ncbi.nlm.nih.gov/genomes/all/GCA/001/925/005/GCA_001925005.1_ASM192500v1
436	Fagopyrum esculentum	ftp://ftp.ncbi.nlm.nih.gov/genomes/all/GCA/004/303/065/GCA_004303065.1_Fesc_l3	SAMN09913966	PRJNA487881	GCA_004303065.1	Scaffold	1087.7	34.7		QWEW01	14903	2019-02-26T00:00:00Z	ftp://ftp.ncbi.nlm.nih.gov/genomes/all/GCA/004/303/065/GCA_004303065.1_Fesc_l3
437	Fagopyrum tataricum	ftp://ftp.ncbi.nlm.nih.gov/genomes/all/GCA/002/319/775/GCA_002319775.1_Ft1.0	SAMN06686189	PRJNA381676	GCA_002319775.1	Chromosome	505.883	38.7564	chromosome 1:CM008279.1; chromosome 2:CM008280.1; chromosome 3:CM008281.1; chromosome 4:CM008282.1; chromosome 5:CM008283.1; chromosome 6:CM008284.1; chromosome 7:CM008285.1; chromosome 8:CM008286.1	NCTC01	7020	2017-09-20T00:00:00Z	ftp://ftp.ncbi.nlm.nih.gov/genomes/all/GCA/002/319/775/GCA_002319775.1_Ft1.0
438	Nyssa sinensis	ftp://ftp.ncbi.nlm.nih.gov/genomes/all/GCA/008/638/375/GCA_008638375.1_ASM863837v1	SAMN12206538	PRJNA552378	GCA_008638375.1	Chromosome	1001.45	35.9841	linkage group LG0:CM018031.1; linkage group LG1:CM018032.1; linkage group LG10:CM018033.1; linkage group LG11:CM018034.1; linkage group LG12:CM018035.1; linkage group LG13:CM018036.1; linkage group LG14:CM018037.1; linkage group LG15:CM018038.1; linkage group LG16:CM018039.1; linkage group LG17:CM018040.1; linkage group LG18:CM018041.1; linkage group LG19:CM018042.1; linkage group LG2:CM018043.1;…	VIRR01	654	2019-09-23T00:00:00Z	ftp://ftp.ncbi.nlm.nih.gov/genomes/all/GCA/008/638/375/GCA_008638375.1_ASM863837v1
439	Actinidia chinensis	ftp://ftp.ncbi.nlm.nih.gov/genomes/all/GCA/003/024/255/GCA_003024255.1_Red5_PS1_1.69.0	SAMN07269859	PRJNA391506	GCA_003024255.1	Chromosome	553.842	35.8027	chromosome LG1:CM009654.1; chromosome LG2:CM009655.1; chromosome LG3:CM009656.1; chromosome LG4:CM009657.1; chromosome LG5:CM009658.1; chromosome LG6:CM009659.1; chromosome LG7:CM009660.1; chromosome LG8:CM009661.1; chromosome LG9:CM009662.1; chromosome LG10:CM009663.1; chromosome LG11:CM009664.1; chromosome LG12:CM009665.1; chromosome LG13:CM009666.1; chromosome LG14:CM009667.1; chromosome LG15:…	NKQK01	1234	2018-03-28T00:00:00Z
440	Actinidia eriantha	ftp://ftp.ncbi.nlm.nih.gov/genomes/all/GCA/004/150/315/GCA_004150315.1_ASM415031v1	SAMN09643536	PRJNA480681	GCA_004150315.1	Chromosome	690.611	35.9315	chromosome I:CM014286.1; chromosome II:CM014287.1; chromosome III:CM014288.1; chromosome IV:CM014289.1; chromosome V:CM014290.1; chromosome VI:CM014291.1; chromosome VII:CM014292.1; chromosome VIII:CM014293.1; chromosome IX:CM014294.1; chromosome X:CM014295.1; chromosome XI:CM014296.1; chromosome XII:CM014297.1; chromosome XIII:CM014298.1; chromosome XIV:CM014299.1; chromosome XIX:CM014300.1; chr…	QOVS01	1735	2019-02-07T00:00:00Z	ftp://ftp.ncbi.nlm.nih.gov/genomes/all/GCA/004/150/315/GCA_004150315.1_ASM415031v1
441	Diospyros lotus	ftp://ftp.ncbi.nlm.nih.gov/genomes/all/GCA/000/774/125/GCA_000774125.1_ASM77412v1	SAMN03019951	PRJNA256104	GCA_000774125.1	Scaffold	1.10419	39.5		JRBH01	796	2014-11-10T00:00:00Z	ftp://ftp.ncbi.nlm.nih.gov/genomes/all/GCA/000/774/125/GCA_000774125.1_ASM77412v1
442	Monotropa hypopitys	ftp://ftp.ncbi.nlm.nih.gov/genomes/all/GCA/002/855/965/GCA_002855965.1_monotropa1.0	SAMN04453695	PRJNA310692	GCA_002855965.1	Contig	2197.49	41.2		NMUG01	1259264	2018-01-03T00:00:00Z	ftp://ftp.ncbi.nlm.nih.gov/genomes/all/GCA/002/855/965/GCA_002855965.1_monotropa1.0
443	Vaccinium macrocarpon	ftp://ftp.ncbi.nlm.nih.gov/genomes/all/GCA/000/775/335/GCA_000775335.2_ASM77533v2	SAMN02739898	PRJNA245813	GCA_000775335.2	Scaffold	414.622	38.2		JOTO01	200203	2014-09-04T00:00:00Z	ftp://ftp.ncbi.nlm.nih.gov/genomes/all/GCA/000/775/335/GCA_000775335.2_ASM77533v2
444	Embelia ribes	ftp://ftp.ncbi.nlm.nih.gov/genomes/all/GCA/001/753/735/GCA_001753735.1_Embelia_ribes_ER1_v1	SAMN05787349	PRJNA343859	GCA_001753735.1	Scaffold	660.51	33.4		MKEJ01	107000	2016-10-06T00:00:00Z	ftp://ftp.ncbi.nlm.nih.gov/genomes/all/GCA/001/753/735/GCA_001753735.1_Embelia_ribes_ER1_v1
445	Primula veris	ftp://ftp.ncbi.nlm.nih.gov/genomes/all/GCA/000/788/445/GCA_000788445.1_ASM78844v1	SAMN02644982	PRJNA238546	GCA_000788445.1	Scaffold	309.693	35.1		JTKG01	8756	2014-12-03T00:00:00Z	ftp://ftp.ncbi.nlm.nih.gov/genomes/all/GCA/000/788/445/GCA_000788445.1_ASM78844v1
446	Primula vulgaris	ftp://ftp.ncbi.nlm.nih.gov/genomes/all/GCA/001/077/355/GCA_001077355.1_ASM107735v1	SAMEA2802728	PRJEB7311	GCA_001077355.1	Scaffold	1.50478	35.6		CDJJ02	229	2015-01-28T00:00:00Z	ftp://ftp.ncbi.nlm.nih.gov/genomes/all/GCA/001/077/355/GCA_001077355.1_ASM107735v1
447	Argania spinosa	ftp://ftp.ncbi.nlm.nih.gov/genomes/all/GCA/003/260/245/GCA_003260245.1_arg_spin_01	SAMN04014715	PRJNA294096	GCA_003260245.1	Scaffold	670.097	32.9		QLOD01	75327	2018-06-22T00:00:00Z	ftp://ftp.ncbi.nlm.nih.gov/genomes/all/GCA/003/260/245/GCA_003260245.1_arg_spin_01
448	Camellia sinensis	ftp://ftp.ncbi.nlm.nih.gov/genomes/all/GCF/004/153/795/GCF_004153795.1_AHAU_CSS_1	SAMN06329939	PRJNA524157	GCA_004153795.1	Scaffold	3105.37	38.7999	chloroplast Pltd:NC_020019.1/	SDRB01	14028	2019-02-11T00:00:00Z	ftp://ftp.ncbi.nlm.nih.gov/genomes/all/GCF/004/153/795/GCF_004153795.1_AHAU_CSS_1
449	Nothapodytes nimmoniana	ftp://ftp.ncbi.nlm.nih.gov/genomes/all/GCA/002/091/855/GCA_002091855.1_Nnimmo_assembly01	SAMD00056125	PRJDB4994	GCA_002091855.1	Contig	1.36527	0		BDGC01	2301	2017-04-03T20:46:00Z	ftp://ftp.ncbi.nlm.nih.gov/genomes/all/GCA/002/091/855/GCA_002091855.1_Nnimmo_assembly01
450	Andrographis paniculata	ftp://ftp.ncbi.nlm.nih.gov/genomes/all/GCA/004/354/405/GCA_004354405.1_ASM435440v1	SAMN08159216	PRJNA421867	GCA_004354405.1	Chromosome	269.408	33.3419	chromosome 1:CM014959.1; chromosome 2:CM014960.1; chromosome 3:CM014961.1; chromosome 4:CM014962.1; chromosome 5:CM014963.1; chromosome 6:CM014964.1; chromosome 7:CM014965.1; chromosome 8:CM014966.1; chromosome 9:CM014967.1; chromosome 10:CM014968.1; chromosome 11:CM014969.1; chromosome 12:CM014970.1; chromosome 13:CM014971.1; chromosome 14:CM014972.1; chromosome 15:CM014973.1; chromosome 16:CM01…	SMLO01	257	2019-03-18T00:00:00Z	ftp://ftp.ncbi.nlm.nih.gov/genomes/all/GCA/004/354/405/GCA_004354405.1_ASM435440v1
451	Ruellia speciosa	ftp://ftp.ncbi.nlm.nih.gov/genomes/all/GCA/001/909/325/GCA_001909325.1_Rspec1.0	SAMN05185177	PRJNA326965	GCA_001909325.1	Contig	740.036	39.1		MAYD01	794288	2016-12-20T00:00:00Z	ftp://ftp.ncbi.nlm.nih.gov/genomes/all/GCA/001/909/325/GCA_001909325.1_Rspec1.0
452	Handroanthus impetiginosus	ftp://ftp.ncbi.nlm.nih.gov/genomes/all/GCA/002/762/385/GCA_002762385.1_Himp0.1	SAMN05195323	PRJNA324125	GCA_002762385.1	Scaffold	503.289	31.9		NKXS01	13204	2017-11-09T00:00:00Z	ftp://ftp.ncbi.nlm.nih.gov/genomes/all/GCA/002/762/385/GCA_002762385.1_Himp0.1
453	Dorcoceras hygrometricum	ftp://ftp.ncbi.nlm.nih.gov/genomes/all/GCA/001/598/015/GCA_001598015.1_Boea_hygrometrica.v1	SAMN02215335	PRJNA182117	GCA_001598015.1	Scaffold	1521.36	43.1		LVEL01	401752	2016-03-25T00:00:00Z	ftp://ftp.ncbi.nlm.nih.gov/genomes/all/GCA/001/598/015/GCA_001598015.1_Boea_hygrometrica.v1
454	Pogostemon cablin	ftp://ftp.ncbi.nlm.nih.gov/genomes/all/GCA/003/675/935/GCA_003675935.1_DSBC_Pcab_1.0	SAMN09222897	PRJNA471952	GCA_003675935.1	Scaffold	1916.69	0		QKXD01	41698	2018-10-23T00:00:00Z	ftp://ftp.ncbi.nlm.nih.gov/genomes/all/GCA/003/675/935/GCA_003675935.1_DSBC_Pcab_1.0
455	Scutellaria baicalensis	ftp://ftp.ncbi.nlm.nih.gov/genomes/all/GCA/005/771/605/GCA_005771605.1_ASM577160v1	SAMN09759447	PRJNA484052	GCA_005771605.1	Chromosome	386.674	34.3448	chromosome 1:CM016721.1; chromosome 2:CM016722.1; chromosome 3:CM016723.1; chromosome 4:CM016724.1; chromosome 5:CM016725.1; chromosome 6:CM016726.1; chromosome 7:CM016727.1; chromosome 8:CM016728.1; chromosome 9:CM016729.1	VALJ01	114	2019-05-14T00:00:00Z	ftp://ftp.ncbi.nlm.nih.gov/genomes/all/GCA/005/771/605/GCA_005771605.1_ASM577160v1
456	Perilla citriodora	ftp://ftp.ncbi.nlm.nih.gov/genomes/all/GCA/004/303/085/GCA_004303085.1_ASM430308v1	SAMN08382016	PRJNA431006	GCA_004303085.1	Scaffold	618.797	34.9		SDAM01	29924	2019-02-26T00:00:00Z	ftp://ftp.ncbi.nlm.nih.gov/genomes/all/GCA/004/303/085/GCA_004303085.1_ASM430308v1
457	Mentha longifolia	ftp://ftp.ncbi.nlm.nih.gov/genomes/all/GCA/001/642/375/GCA_001642375.1_Mlong1.0	SAMN04452879	PRJNA310613	GCA_001642375.1	Scaffold	353.287	36.7		LSBG01	190876	2016-05-11T00:00:00Z	ftp://ftp.ncbi.nlm.nih.gov/genomes/all/GCA/001/642/375/GCA_001642375.1_Mlong1.0
458	Salvia splendens	ftp://ftp.ncbi.nlm.nih.gov/genomes/all/GCA/004/379/255/GCA_004379255.1_SspV1	SAMN08162997	PRJNA422035	GCA_004379255.1	Scaffold	809.16	38.8		PNBA01	1525	2019-03-26T00:00:00Z	ftp://ftp.ncbi.nlm.nih.gov/genomes/all/GCA/004/379/255/GCA_004379255.1_SspV1
459	Ocimum tenuiflorum	ftp://ftp.ncbi.nlm.nih.gov/genomes/all/GCA/001/278/415/GCA_001278415.1_OciTen1.0	SAMN02378864	PRJNA223343	GCA_001278415.1	Contig	332.617	35.8		AYJT01	121993	2015-09-02T00:00:00Z	ftp://ftp.ncbi.nlm.nih.gov/genomes/all/GCA/001/278/415/GCA_001278415.1_OciTen1.0
460	Genlisea aurea	ftp://ftp.ncbi.nlm.nih.gov/genomes/all/GCA/000/441/915/GCA_000441915.1_GenAur_1.0	SAMN02206260	PRJNA208769	GCA_000441915.1	Scaffold	43.3578	40.6		AUSU01	10684	2013-07-26T00:00:00Z	ftp://ftp.ncbi.nlm.nih.gov/genomes/all/GCA/000/441/915/GCA_000441915.1_GenAur_1.0
461	Utricularia gibba	ftp://ftp.ncbi.nlm.nih.gov/genomes/all/GCA/002/189/035/GCA_002189035.1_U_gibba_v2	SAMN06684416	PRJNA383049	GCA_002189035.1	Chromosome	100.689	41.1434	chromosome 1:CM007989.1; chromosome 2:CM007990.1; chromosome 3:CM007991.1; chromosome 4:CM007992.1	NEEC01	518	2017-05-31T00:00:00Z	ftp://ftp.ncbi.nlm.nih.gov/genomes/all/GCA/002/189/035/GCA_002189035.1_U_gibba_v2
462	Utricularia reniformis	ftp://ftp.ncbi.nlm.nih.gov/genomes/all/GCA/009/725/065/GCA_009725065.1_Urenif-v1	SAMN03893229	PRJNA290588	GCA_009725065.1	Scaffold	304.539	36		RWGZ01	1825	2019-12-02T00:00:00Z	ftp://ftp.ncbi.nlm.nih.gov/genomes/all/GCA/009/725/065/GCA_009725065.1_Urenif-v1
463	Lindernia brevidens	ftp://ftp.ncbi.nlm.nih.gov/genomes/all/GCA/004/919/715/GCA_004919715.1_ASM491971v1	SAMN10026761	PRJNA489464	GCA_004919715.1	Scaffold	266.105	39.2		SWDC01	158	2019-04-29T00:00:00Z	ftp://ftp.ncbi.nlm.nih.gov/genomes/all/GCA/004/919/715/GCA_004919715.1_ASM491971v1
464	Fraxinus excelsior	ftp://ftp.ncbi.nlm.nih.gov/genomes/all/GCA/900/149/125/GCA_900149125.1_BATG-0.5	SAMEA2248197	PRJEB4958	GCA_900149125.1	Scaffold	867.455	0		FTPI01	89515	2017-01-20T00:00:00Z	ftp://ftp.ncbi.nlm.nih.gov/genomes/all/GCA/900/149/125/GCA_900149125.1_BATG-0.5
465	Olea europaea	ftp://ftp.ncbi.nlm.nih.gov/genomes/all/GCF/002/742/605/GCF_002742605.1_O_europaea_v1	SAMN05943011	PRJNA417827	GCA_002742605.1	Chromosome	1141.15	36.7747	chromosome 1:NC_036237.1/CM008515.1; chromosome 2:NC_036238.1/CM008516.1; chromosome 3:NC_036239.1/CM008517.1; chromosome 4:NC_036240.1/CM008518.1; chromosome 5:NC_036241.1/CM008519.1; chromosome 6:NC_036242.1/CM008520.1; chromosome 7:NC_036243.1/CM008521.1; chromosome 8:NC_036244.1/CM008522.1; chromosome 9:NC_036245.1/CM008523.1; chromosome 10:NC_036246.1/CM008524.1; chromosome 11:NC_036247.1/CM…	MSRW01	41226	2017-11-01T00:00:00Z	ftp://ftp.ncbi.nlm.nih.gov/genomes/all/GCF/002/742/605/GCF_002742605.1_O_europaea_v1
466	Striga asiatica	ftp://ftp.ncbi.nlm.nih.gov/genomes/all/GCA/008/636/005/GCA_008636005.1_SGA_v2.0	SAMD00056127	PRJDB4996	GCA_008636005.1	Scaffold	471.563	35.4		BKCP01	13846	2019-09-20T00:00:00Z	ftp://ftp.ncbi.nlm.nih.gov/genomes/all/GCA/008/636/005/GCA_008636005.1_SGA_v2.0
467	Sesamum indicum	ftp://ftp.ncbi.nlm.nih.gov/genomes/all/GCF/000/512/975/GCF_000512975.1_S_indicum_v1.0	SAMN02981519	PRJNA268358	GCA_000512975.1	Chromosome	275.059	35.2239	linkage group LG1:NC_026145.1/CM002349.1; linkage group LG2:NC_026146.1/CM002357.1; linkage group LG3:NC_026147.1/CM002358.1; linkage group LG4:NC_026148.1/CM002359.1; linkage group LG5:NC_026149.1/CM002360.1; linkage group LG6:NC_026150.1/CM002361.1; linkage group LG7:NC_026151.1/CM002362.1; linkage group LG8:NC_026152.1/CM002363.1; linkage group LG9:NC_026153.1/CM002364.1; linkage group LG10:NC…	APMJ01	16369	2013-12-24T00:00:00Z	ftp://ftp.ncbi.nlm.nih.gov/genomes/all/GCA/000/512/975/GCA_000512975.1_S_indicum_v1.0
468	Erythranthe guttata	ftp://ftp.ncbi.nlm.nih.gov/genomes/all/GCF/000/504/015/GCF_000504015.1_Mimgu1_0	SAMN02742818	PRJNA13880	GCA_000504015.1	Scaffold	322.167	36.3144	mitochondrion MT:NC_018041.1/	APLE01	2212	2013-12-04T00:00:00Z	ftp://ftp.ncbi.nlm.nih.gov/genomes/all/GCA/000/504/015/GCA_000504015.1_Mimgu1_0
469	Penstemon barbatus	ftp://ftp.ncbi.nlm.nih.gov/genomes/all/GCA/003/313/485/GCA_003313485.1_Duke_Pbarb_2016	SAMN09598766	PRJNA479669	GCA_003313485.1	Contig	696.306	0		QOIQ01	18827	2018-07-11T00:00:00Z	ftp://ftp.ncbi.nlm.nih.gov/genomes/all/GCA/003/313/485/GCA_003313485.1_Duke_Pbarb_2016
470	Penstemon centranthifolius	ftp://ftp.ncbi.nlm.nih.gov/genomes/all/GCA/000/737/435/GCA_000737435.1_ASM73743v1	SAMN02711299	PRJNA242923	GCA_000737435.1	Contig	4.47159	39.9		JPFH01	6761	2014-08-04T00:00:00Z	ftp://ftp.ncbi.nlm.nih.gov/genomes/all/GCA/000/737/435/GCA_000737435.1_ASM73743v1
471	Penstemon grinnellii	ftp://ftp.ncbi.nlm.nih.gov/genomes/all/GCA/000/737/425/GCA_000737425.1_ASM73742v1	SAMN02711300	PRJNA242923	GCA_000737425.1	Contig	3.66352	39.8		JPFI01	5523	2014-08-04T00:00:00Z	ftp://ftp.ncbi.nlm.nih.gov/genomes/all/GCA/000/737/425/GCA_000737425.1_ASM73742v1
472	Cuscuta australis	ftp://ftp.ncbi.nlm.nih.gov/genomes/all/GCA/003/260/385/GCA_003260385.1_Cau_v1.0	SAMN07347267	PRJNA394036	GCA_003260385.1	Contig	262.63	36.4		NQVE01	218	2018-06-22T00:00:00Z	ftp://ftp.ncbi.nlm.nih.gov/genomes/all/GCA/003/260/385/GCA_003260385.1_Cau_v1.0
473	Cuscuta campestris	ftp://ftp.ncbi.nlm.nih.gov/genomes/all/GCA/900/332/095/GCA_900332095.1_ASM90033209v1	SAMEA103956347	PRJEB19879	GCA_900332095.1	Scaffold	476.792	0		OOIL01	6907	2018-04-12T00:00:00Z	ftp://ftp.ncbi.nlm.nih.gov/genomes/all/GCA/900/332/095/GCA_900332095.1_ASM90033209v1
474	Ipomoea batatas	ftp://ftp.ncbi.nlm.nih.gov/genomes/all/GCA/002/525/835/GCA_002525835.2_ipoBat4	SAMN04254013	PRJNA301667	GCA_002525835.2	Chromosome	837.013	35.8684	chromosome 1:CM008331.1; chromosome 2:CM008332.1; chromosome 3:CM008333.1; chromosome 4:CM008334.1; chromosome 5:CM008335.1; chromosome 6:CM008336.1; chromosome 7:CM008337.1; chromosome 8:CM008338.1; chromosome 9:CM008339.1; chromosome 10:CM008340.1; chromosome 11:CM008341.1; chromosome 12:CM008342.1; chromosome 13:CM008343.1; chromosome 14:CM008344.1; chromosome 15:CM008345.1	NXFB01	28461	2017-10-11T00:00:00Z	ftp://ftp.ncbi.nlm.nih.gov/genomes/all/GCA/002/525/835/GCA_002525835.2_ipoBat4
475	Ipomoea nil	ftp://ftp.ncbi.nlm.nih.gov/genomes/all/GCF/001/879/475/GCF_001879475.1_Asagao_1.1	SAMD00022859	PRJDB4356	GCA_001879475.1	Scaffold	735.231	37.6024	mitochondrion MT:NC_031158.1/AP017303.1; chloroplast Pltd:NC_031159.1/AP017304.1	BDFN01	3418	2016-09-01T00:00:00Z	ftp://ftp.ncbi.nlm.nih.gov/genomes/all/GCA/001/879/475/GCA_001879475.1_Asagao_1.1
476	Ipomoea trifida	ftp://ftp.ncbi.nlm.nih.gov/genomes/all/GCA/003/576/665/GCA_003576665.1_ASM357666v1	SAMN08284054	PRJNA428214	GCA_003576665.1	Chromosome	492.376	37.2563	chromosome 1:CP025644.1; chromosome 2:CP025645.1; chromosome 3:CP025646.1; chromosome 4:CP025647.1; chromosome 5:CP025648.1; chromosome 6:CP025649.1; chromosome 7:CP025650.1; chromosome 8:CP025651.1; chromosome 9:CP025652.1; chromosome 10:CP025653.1; chromosome 11:CP025654.1; chromosome 12:CP025655.1; chromosome 13:CP025656.1; chromosome 14:CP025657.1; chromosome 15:CP025658.1; chromosome 16:CP02…		16	2018-09-19T00:00:00Z	ftp://ftp.ncbi.nlm.nih.gov/genomes/all/GCA/003/576/665/GCA_003576665.1_ASM357666v1
477	Ipomoea triloba	ftp://ftp.ncbi.nlm.nih.gov/genomes/all/GCA/003/576/645/GCA_003576645.1_ASM357664v1	SAMN08285276	PRJNA574454	GCA_003576645.1	Chromosome	461.989	36.4362	chromosome 1:NC_044916.1/CP025660.1; chromosome 2:NC_044917.1/CP025661.1; chromosome 3:NC_044918.1/CP025662.1; chromosome 4:NC_044919.1/CP025663.1; chromosome 5:NC_044920.1/CP025664.1; chromosome 6:NC_044921.1/CP025665.1; chromosome 7:NC_044922.1/CP025666.1; chromosome 8:NC_044923.1/CP025667.1; chromosome 9:NC_044924.1/CP025668.1; chromosome 10:NC_044925.1/CP025669.1; chromosome 11:NC_044926.1/CP…		17	2018-09-19T00:00:00Z	ftp://ftp.ncbi.nlm.nih.gov/genomes/all/GCA/003/576/645/GCA_003576645.1_ASM357664v1
478	Nicotiana attenuata	ftp://ftp.ncbi.nlm.nih.gov/genomes/all/GCF/001/879/085/GCF_001879085.1_NIATTr2	SAMN04590212	PRJNA355166	GCA_001879085.1	Chromosome	2365.68	41.333	chromosome 1:NC_031989.1/CM007391.1; chromosome 2:NC_031990.1/CM007392.1; chromosome 3:NC_031991.1/CM007393.1; chromosome 4:NC_031992.1/CM007394.1; chromosome 5:NC_031993.1/CM007395.1; chromosome 6:NC_031994.1/CM007396.1; chromosome 7:NC_031995.1/CM007397.1; chromosome 8:NC_031996.1/CM007398.1; chromosome 9:NC_031997.1/CM007399.1; chromosome 10:NC_031998.1/CM007400.1; chromosome 11:NC_031999.1/CM…	MJEQ01	37194	2016-11-14T00:00:00Z	ftp://ftp.ncbi.nlm.nih.gov/genomes/all/GCA/001/879/085/GCA_001879085.1_NIATTr2
479	Nicotiana glauca	ftp://ftp.ncbi.nlm.nih.gov/genomes/all/GCA/002/930/595/GCA_002930595.1_NicGla1.0	SAMN07843557	PRJNA416772	GCA_002930595.1	Scaffold	3222.83	36.6		PGPE01	514289	2018-02-16T00:00:00Z	ftp://ftp.ncbi.nlm.nih.gov/genomes/all/GCA/002/930/595/GCA_002930595.1_NicGla1.0
480	Nicotiana knightiana	ftp://ftp.ncbi.nlm.nih.gov/genomes/all/GCA/005/239/525/GCA_005239525.1_ASM523952v1	SAMN05449209	PRJNA335604	GCA_005239525.1	Scaffold	2298.94	39.7		MDKJ01	160415	2019-05-02T00:00:00Z	ftp://ftp.ncbi.nlm.nih.gov/genomes/all/GCA/005/239/525/GCA_005239525.1_ASM523952v1
481	Nicotiana obtusifolia	ftp://ftp.ncbi.nlm.nih.gov/genomes/all/GCA/002/018/475/GCA_002018475.1_NIOBT.version3	SAMN04590138	PRJNA316794	GCA_002018475.1	Scaffold	1222.77	38.4		MCJB01	53128	2017-03-06T00:00:00Z	ftp://ftp.ncbi.nlm.nih.gov/genomes/all/GCA/002/018/475/GCA_002018475.1_NIOBT.version3
482	Nicotiana otophora	ftp://ftp.ncbi.nlm.nih.gov/genomes/all/GCA/000/715/115/GCA_000715115.1_Noto	SAMN02316630	PRJNA208212	GCA_000715115.1	Scaffold	2689.35	39.1		AWOL01	929607	2014-06-05T00:00:00Z	ftp://ftp.ncbi.nlm.nih.gov/genomes/all/GCA/000/715/115/GCA_000715115.1_Noto
483	Nicotiana paniculata	ftp://ftp.ncbi.nlm.nih.gov/genomes/all/GCA/005/239/505/GCA_005239505.1_ASM523950v1	SAMN05449208	PRJNA335603	GCA_005239505.1	Scaffold	2190.56	39.4		MDKI01	181977	2019-05-02T00:00:00Z	ftp://ftp.ncbi.nlm.nih.gov/genomes/all/GCA/005/239/505/GCA_005239505.1_ASM523950v1
484	Nicotiana rustica	ftp://ftp.ncbi.nlm.nih.gov/genomes/all/GCA/005/239/535/GCA_005239535.1_ASM523953v1	SAMN05449206	PRJNA335601	GCA_005239535.1	Scaffold	4231.29	40		MDKG01	337581	2019-05-02T00:00:00Z	ftp://ftp.ncbi.nlm.nih.gov/genomes/all/GCA/005/239/535/GCA_005239535.1_ASM523953v1
485	Nicotiana sylvestris	ftp://ftp.ncbi.nlm.nih.gov/genomes/all/GCF/000/393/655/GCF_000393655.1_Nsyl	SAMN02981529	PRJNA182500	GCA_000393655.1	Scaffold	2221.99	39.7999	chloroplast Pltd:NC_007500.1/	ASAF01	253918	2013-05-08T00:00:00Z	ftp://ftp.ncbi.nlm.nih.gov/genomes/all/GCA/000/393/655/GCA_000393655.1_Nsyl
486	Nicotiana tabacum	ftp://ftp.ncbi.nlm.nih.gov/genomes/all/GCF/000/715/135/GCF_000715135.1_Ntab-TN90	SAMN02316627	PRJNA319578	GCA_000715135.1	Scaffold	3643.47	39.2006	plastid Pltd:NC_001879.2/; mitochondrion MT:NC_006581.1/	AYMY01	168247	2014-05-29T00:00:00Z	ftp://ftp.ncbi.nlm.nih.gov/genomes/all/GCA/000/715/135/GCA_000715135.1_Ntab-TN90
487	Nicotiana tomentosiformis	ftp://ftp.ncbi.nlm.nih.gov/genomes/all/GCF/000/390/325/GCF_000390325.2_Ntom_v01	SAMN02981530	PRJNA182501	GCA_000390325.2	Scaffold	1688.47	39.0999	chloroplast Pltd:NC_007602.1/	ASAG01	159548	2013-05-10T00:00:00Z	ftp://ftp.ncbi.nlm.nih.gov/genomes/all/GCA/000/390/325/GCA_000390325.2_Ntom_v01
488	Nicotiana undulata	ftp://ftp.ncbi.nlm.nih.gov/genomes/all/GCA/005/239/495/GCA_005239495.1_ASM523949v1	SAMN05449207	PRJNA335602	GCA_005239495.1	Scaffold	1914.3	40		MDKH01	117566	2019-05-02T00:00:00Z	ftp://ftp.ncbi.nlm.nih.gov/genomes/all/GCA/005/239/495/GCA_005239495.1_ASM523949v1
489	Capsicum annuum	ftp://ftp.ncbi.nlm.nih.gov/genomes/all/GCF/000/710/875/GCF_000710875.1_Pepper_Zunla_1_Ref_v1.0	SAMN01906946	PRJNA186921	GCA_000710875.1	Chromosome	2935.88	35.4061	chromosome 1:NC_029977.1/CM002812.1; chromosome 2:NC_029978.1/CM002813.1; chromosome 3:NC_029979.1/CM002814.1; chromosome 4:NC_029980.1/CM002815.1; chromosome 5:NC_029981.1/CM002816.1; chromosome 6:NC_029982.1/CM002817.1; chromosome 7:NC_029983.1/CM002818.1; chromosome 8:NC_029984.1/CM002819.1; chromosome 9:NC_029985.1/CM002820.1; chromosome 10:NC_029986.1/CM002821.1; chromosome 11:NC_029987.1/CM…	ASJU01	6478	2014-06-23T00:00:00Z	ftp://ftp.ncbi.nlm.nih.gov/genomes/all/GCA/000/710/875/GCA_000710875.1_Pepper_Zunla_1_Ref_v1.0
490	Capsicum baccatum	ftp://ftp.ncbi.nlm.nih.gov/genomes/all/GCA/002/271/885/GCA_002271885.2_ASM227188v2	SAMN04417068	PRJNA308879	GCA_002271885.2	Chromosome	3215.61	35.4251	chromosome 1:CM008443.1; chromosome 2:CM008444.1; chromosome 3:CM008445.1; chromosome 4:CM008446.1; chromosome 5:CM008447.1; chromosome 6:CM008448.1; chromosome 7:CM008449.1; chromosome 8:CM008450.1; chromosome 9:CM008451.1; chromosome 10:CM008452.1; chromosome 11:CM008453.1; chromosome 12:CM008454.1	MLFT02	23260	2017-08-16T00:00:00Z	ftp://ftp.ncbi.nlm.nih.gov/genomes/all/GCA/002/271/885/GCA_002271885.2_ASM227188v2
491	Capsicum chinense	ftp://ftp.ncbi.nlm.nih.gov/genomes/all/GCA/002/271/895/GCA_002271895.2_ASM227189v2	SAMN05435899	PRJNA331024	GCA_002271895.2	Chromosome	3070.91	34.8646	chromosome 1:CM008431.1; chromosome 2:CM008432.1; chromosome 3:CM008433.1; chromosome 4:CM008434.1; chromosome 5:CM008435.1; chromosome 6:CM008436.1; chromosome 7:CM008437.1; chromosome 8:CM008438.1; chromosome 9:CM008439.1; chromosome 10:CM008440.1; chromosome 11:CM008441.1; chromosome 12:CM008442.1	MCIT02	87978	2017-08-14T00:00:00Z	ftp://ftp.ncbi.nlm.nih.gov/genomes/all/GCA/002/271/895/GCA_002271895.2_ASM227189v2
492	Jaltomata sinuosa	ftp://ftp.ncbi.nlm.nih.gov/genomes/all/GCA/003/996/215/GCA_003996215.1_ASM399621v1	SAMN09302773	PRJNA474403	GCA_003996215.1	Scaffold	1443.2	37.9		QJPP01	7667	2019-01-07T00:00:00Z	ftp://ftp.ncbi.nlm.nih.gov/genomes/all/GCA/003/996/215/GCA_003996215.1_ASM399621v1
493	Solanum arcanum	ftp://ftp.ncbi.nlm.nih.gov/genomes/all/GCA/000/612/985/GCA_000612985.1_Soarc10	SAMEA3138986	PRJEB5226	GCA_000612985.1	Contig	665.187	33.6		CBYQ01	46594	2014-03-21T00:00:00Z	ftp://ftp.ncbi.nlm.nih.gov/genomes/all/GCA/000/612/985/GCA_000612985.1_Soarc10
494	Solanum chilense	ftp://ftp.ncbi.nlm.nih.gov/genomes/all/GCA/006/013/705/GCA_006013705.1_ASM601370v1	SAMN10186767	PRJNA508893	GCA_006013705.1	Scaffold	913.881	24.8		RXGB01	81304	2019-06-05T00:00:00Z	ftp://ftp.ncbi.nlm.nih.gov/genomes/all/GCA/006/013/705/GCA_006013705.1_ASM601370v1
495	Solanum habrochaites	ftp://ftp.ncbi.nlm.nih.gov/genomes/all/GCA/000/577/655/GCA_000577655.1_Sohab10	SAMEA3138934	PRJEB5227	GCA_000577655.1	Contig	724.285	33.6		CBYS01	42990	2014-02-17T00:00:00Z	ftp://ftp.ncbi.nlm.nih.gov/genomes/all/GCA/000/577/655/GCA_000577655.1_Sohab10
496	Solanum lycopersicum	ftp://ftp.ncbi.nlm.nih.gov/genomes/all/GCF/000/188/115/GCF_000188115.4_SL3.0	SAMN02981290	PRJNA119	GCA_000188115.3	Chromosome	828.349	35.6991	chromosome 1:NC_015438.3/CM001064.3; chromosome 2:NC_015439.3/CM001065.3; chromosome 3:NC_015440.3/CM001066.3; chromosome 4:NC_015441.3/CM001067.3; chromosome 5:NC_015442.3/CM001068.3; chromosome 6:NC_015443.3/CM001069.3; chromosome 7:NC_015444.3/CM001070.3; chromosome 8:NC_015445.3/CM001071.3; chromosome 9:NC_015446.3/CM001072.3; chromosome 10:NC_015447.3/CM001073.3; chromosome 11:NC_015448.3/CM…	AEKE03	3150	2010-12-10T00:00:00Z	ftp://ftp.ncbi.nlm.nih.gov/genomes/all/GCA/000/188/115/GCA_000188115.3_SL3.0
497	Solanum pennellii	ftp://ftp.ncbi.nlm.nih.gov/genomes/all/GCF/001/406/875/GCF_001406875.1_SPENNV200	SAMEA3283146	PRJNA256387	GCA_001406875.2	Chromosome	926.426	35.6914	chromosome 1:NC_028637.1/HG975440.1; chromosome 2:NC_028638.1/HG975441.1; chromosome 3:NC_028639.1/HG975442.1; chromosome 4:NC_028640.1/HG975443.1; chromosome 5:NC_028641.1/HG975444.1; chromosome 6:NC_028642.1/HG975445.1; chromosome 7:NC_028643.1/HG975446.1; chromosome 8:NC_028644.1/HG975447.1; chromosome 9:NC_028645.1/HG975448.1; chromosome 10:NC_028646.1/HG975449.1; chromosome 11:NC_028647.1/HG…		12	2014-06-25T00:00:00Z	ftp://ftp.ncbi.nlm.nih.gov/genomes/all/GCA/001/406/875/GCA_001406875.2_SPENNV200
498	Solanum pimpinellifolium	ftp://ftp.ncbi.nlm.nih.gov/genomes/all/GCA/003/660/305/GCA_003660305.1_KAUST_Spi-LA0480_1.0	SAMN07224593	PRJNA390234	GCA_003660305.1	Scaffold	748.694	32.3		NRDK01	48863	2018-10-15T00:00:00Z	ftp://ftp.ncbi.nlm.nih.gov/genomes/all/GCA/003/660/305/GCA_003660305.1_KAUST_Spi-LA0480_1.0
499	Solanum commersonii	ftp://ftp.ncbi.nlm.nih.gov/genomes/all/GCA/001/239/805/GCA_001239805.1_ASM123980v1	SAMN03247563	PRJNA269007	GCA_001239805.1	Scaffold	729.603	34.7		JXZD01	63664	2015-04-21T00:00:00Z	ftp://ftp.ncbi.nlm.nih.gov/genomes/all/GCA/001/239/805/GCA_001239805.1_ASM123980v1
500	Solanum melongena	ftp://ftp.ncbi.nlm.nih.gov/genomes/all/GCA/000/787/875/GCA_000787875.1_SME_r2.5.1		PRJDB1505	GCA_000787875.1	Scaffold	833.081	36.2		BAUE01	33873	2014-09-17T00:00:00Z
501	Solanum tuberosum	ftp://ftp.ncbi.nlm.nih.gov/genomes/all/GCF/000/226/075/GCF_000226075.1_SolTub_3.0	SAMN02981305	PRJNA63145	GCA_000226075.1	Scaffold	705.934	35.6005	chloroplast Pltd:NC_008096.2/	AEWC01	14854	2011-05-24T00:00:00Z	ftp://ftp.ncbi.nlm.nih.gov/genomes/all/GCA/000/226/075/GCA_000226075.1_SolTub_3.0
502	Solanum verrucosum	ftp://ftp.ncbi.nlm.nih.gov/genomes/all/GCA/900/185/145/GCA_900185145.1_discovar-mp-dt-bn	SAMEA104077226	PRJEB21127	GCA_900185145.1	Scaffold	730.142	34		FYAA01	224100	2018-05-23T00:00:00Z	ftp://ftp.ncbi.nlm.nih.gov/genomes/all/GCA/900/185/145/GCA_900185145.1_discovar-mp-dt-bn
503	Asclepias syriaca	ftp://ftp.ncbi.nlm.nih.gov/genomes/all/GCA/002/018/285/GCA_002018285.1_ASM201828v1	SAMN06166495	PRJNA210776	GCA_002018285.1	Scaffold	236.77	36.9		MSXX01	221855	2017-03-03T00:00:00Z	ftp://ftp.ncbi.nlm.nih.gov/genomes/all/GCA/002/018/285/GCA_002018285.1_ASM201828v1
504	Calotropis procera	ftp://ftp.ncbi.nlm.nih.gov/genomes/all/GCA/004/801/955/GCA_004801955.1_ASM480195v1	SAMN03983816	PRJNA292713	GCA_004801955.1	Scaffold	209.215	20		LVCA01	20519	2019-04-22T00:00:00Z	ftp://ftp.ncbi.nlm.nih.gov/genomes/all/GCA/004/801/955/GCA_004801955.1_ASM480195v1
505	Rhazya stricta	ftp://ftp.ncbi.nlm.nih.gov/genomes/all/GCA/001/752/375/GCA_001752375.1_RHA1.0	SAMN03956791	PRJNA291945	GCA_001752375.1	Scaffold	274.354	32.9		MEJB01	979	2016-10-04T00:00:00Z	ftp://ftp.ncbi.nlm.nih.gov/genomes/all/GCA/001/752/375/GCA_001752375.1_RHA1.0
506	Catharanthus roseus	ftp://ftp.ncbi.nlm.nih.gov/genomes/all/GCA/000/949/345/GCA_000949345.1_ASM94934v1	SAMN02989763	PRJNA252611	GCA_000949345.1	Scaffold	522.654	33.6		JQHZ01	79302	2015-03-06T00:00:00Z	ftp://ftp.ncbi.nlm.nih.gov/genomes/all/GCA/000/949/345/GCA_000949345.1_ASM94934v1
507	Coffea arabica	ftp://ftp.ncbi.nlm.nih.gov/genomes/all/GCF/003/713/225/GCF_003713225.1_Cara_1.0	SAMN10272287	PRJNA506972	GCA_003713225.1	Chromosome	1094.45	36.9585	chromosome 1c:NC_039898.1/CM011106.1; chromosome 1e:NC_039899.1/CM011107.1; chromosome 2c:NC_039900.1/CM011108.1; chromosome 2e:NC_039901.1/CM011109.1; chromosome 3c:NC_039902.1/CM011110.1; chromosome 3e:NC_039903.1/CM011111.1; chromosome 4c:NC_039904.1/CM011112.1; chromosome 4e:NC_039905.1/CM011113.1; chromosome 5e:NC_039906.1/CM011115.1; chromosome 5c:NC_039907.1/CM011114.1; chromosome 6c:NC_03…	RHJU01	2833	2018-11-06T00:00:00Z	ftp://ftp.ncbi.nlm.nih.gov/genomes/all/GCA/003/713/225/GCA_003713225.1_Cara_1.0
508	Coffea canephora	ftp://ftp.ncbi.nlm.nih.gov/genomes/all/GCA/900/059/795/GCA_900059795.1_AUK_PRJEB4211_v1	SAMEA3146290	PRJEB4211	GCA_900059795.1	Chromosome	568.612	38.8916	chromosome I:HG974428.1; chromosome II:HG974437.1; chromosome III:HG974438.1; chromosome IV:HG974429.1; chromosome V:HG974430.1; chromosome VI:HG974431.1; chromosome VII:HG974432.1; chromosome VIII:HG974433.1; chromosome IX:HG974434.1; chromosome X:HG974435.1; chromosome XI:HG974436.1	CBUE02	13345	2014-06-27T00:00:00Z	ftp://ftp.ncbi.nlm.nih.gov/genomes/all/GCA/900/059/795/GCA_900059795.1_AUK_PRJEB4211_v1
509	Coffea eugenioides	ftp://ftp.ncbi.nlm.nih.gov/genomes/all/GCF/003/713/205/GCF_003713205.1_Ceug_1.0	SAMN10269643	PRJNA508372	GCA_003713205.1	Chromosome	699.904	37.153	chromosome 1:NC_040035.1/CM011091.1; chromosome 2:NC_040036.1/CM011092.1; chromosome 3:NC_040037.1/CM011093.1; chromosome 4:NC_040038.1/CM011094.1; chromosome 5:NC_040039.1/CM011095.1; chromosome 6:NC_040040.1/CM011096.1; chromosome 7:NC_040041.1/CM011097.1; chromosome 8:NC_040042.1/CM011098.1; chromosome 9:NC_040043.1/CM011099.1; chromosome 10:NC_040044.1/CM011100.1; chromosome 11:NC_040045.1/CM…	RHJT01	3530	2018-11-06T00:00:00Z	ftp://ftp.ncbi.nlm.nih.gov/genomes/all/GCA/003/713/205/GCA_003713205.1_Ceug_1.0
510	Echium plantagineum	ftp://ftp.ncbi.nlm.nih.gov/genomes/all/GCA/003/412/495/GCA_003412495.1_ASM341249v1	SAMN06972310	PRJNA386536	GCA_003412495.2	Chromosome	349.028	34.7153	linkage group LG1:CM016562.1; linkage group LG2:CM016563.1; linkage group LG3:CM016561.1; linkage group LG4:CM016564.1; linkage group LG5:CM016565.1; linkage group LG6:CM016566.1; linkage group LG7:CM016567.1; linkage group LG8:CM016568.1	QFAX02	809	2018-08-21T00:00:00Z
511	Mikania micrantha	ftp://ftp.ncbi.nlm.nih.gov/genomes/all/GCA/009/363/875/GCA_009363875.1_ASM936387v1	SAMN11180626	PRJNA528368	GCA_009363875.1	Chromosome	1790.64	36.1952	linkage group LG1:CM018680.1; linkage group LG10:CM018681.1; linkage group LG11:CM018682.1; linkage group LG12:CM018683.1; linkage group LG13:CM018684.1; linkage group LG14:CM018685.1; linkage group LG15:CM018686.1; linkage group LG16:CM018687.1; linkage group LG17:CM018688.1; linkage group LG18:CM018689.1; linkage group LG19:CM018690.1; linkage group LG2:CM018691.1; linkage group LG3:CM018692.1;…	SZYD01	2815	2019-10-28T00:00:00Z	ftp://ftp.ncbi.nlm.nih.gov/genomes/all/GCA/009/363/875/GCA_009363875.1_ASM936387v1
512	Artemisia annua	ftp://ftp.ncbi.nlm.nih.gov/genomes/all/GCA/003/112/345/GCA_003112345.1_ASM311234v1	SAMN08125514	PRJNA416223	GCA_003112345.1	Scaffold	1792.86	34.1		PKPP01	39400	2018-05-08T00:00:00Z	ftp://ftp.ncbi.nlm.nih.gov/genomes/all/GCA/003/112/345/GCA_003112345.1_ASM311234v1
513	Chrysanthemum seticuspe	ftp://ftp.ncbi.nlm.nih.gov/genomes/all/GCA/004/359/105/GCA_004359105.1_CSE_r1.0	SAMD00074442	PRJDB5536	GCA_004359105.1	Scaffold	2721.84	32.3		BDUE01	354212	2019-02-05T21:45:00Z	ftp://ftp.ncbi.nlm.nih.gov/genomes/all/GCA/004/359/105/GCA_004359105.1_CSE_r1.0
514	Erigeron canadensis	ftp://ftp.ncbi.nlm.nih.gov/genomes/all/GCA/000/775/935/GCA_000775935.1_ASM77593v1	SAMN02798061	PRJNA248374	GCA_000775935.1	Contig	326.165	33.5		JSWR01	20075	2014-11-13T00:00:00Z	ftp://ftp.ncbi.nlm.nih.gov/genomes/all/GCA/000/775/935/GCA_000775935.1_ASM77593v1
515	Helianthus annuus	ftp://ftp.ncbi.nlm.nih.gov/genomes/all/GCF/002/127/325/GCF_002127325.1_HanXRQr1.0	SAMN05868438	PRJNA396063	GCA_002127325.1	Chromosome	3027.84	38.911	linkage group 1:NC_035433.1/CM007890.1; linkage group 2:NC_035434.1/CM007891.1; linkage group 3:NC_035435.1/CM007892.1; linkage group 4:NC_035436.1/CM007893.1; linkage group 5:NC_035437.1/CM007894.1; linkage group 6:NC_035438.1/CM007895.1; linkage group 7:NC_035439.1/CM007896.1; linkage group 8:NC_035440.1/CM007897.1; linkage group 9:NC_035441.1/CM007898.1; linkage group 10:NC_035442.1/CM007899.1…	MNCJ01	1528	2017-05-08T00:00:00Z	ftp://ftp.ncbi.nlm.nih.gov/genomes/all/GCA/002/127/325/GCA_002127325.1_HanXRQr1.0
516	Silphium perfoliatum	ftp://ftp.ncbi.nlm.nih.gov/genomes/all/GCA/900/538/075/GCA_900538075.1_Sp_tGBS_contigs	SAMEA4888311	PRJEB28201	GCA_900538075.1	Contig	121.712	36.7		UXAI01	1197534	2018-11-16T00:00:00Z	ftp://ftp.ncbi.nlm.nih.gov/genomes/all/GCA/900/538/075/GCA_900538075.1_Sp_tGBS_contigs
517	Cynara cardunculus var. scolymus	ftp://ftp.ncbi.nlm.nih.gov/genomes/all/GCF/001/531/365/GCF_001531365.1_CcrdV1	SAMN03402638	PRJNA453787	GCA_001531365.1	Chromosome	725.198	36.7454	chromosome LG 1:NC_037528.1/CM009732.1; chromosome LG 2:NC_037529.1/CM009733.1; chromosome LG 3:NC_037530.1/CM009734.1; chromosome LG 4:NC_037531.1/CM009735.1; chromosome LG 5:NC_037532.1/CM009736.1; chromosome LG 6:NC_037533.1/CM009737.1; chromosome LG 7:NC_037534.1/CM009738.1; chromosome LG 8:NC_037535.1/CM009739.1; chromosome LG 9:NC_037536.1/CM009740.1; chromosome LG 10:NC_037537.1/CM009741.1…	LEKV01	13588	2016-01-21T00:00:00Z	ftp://ftp.ncbi.nlm.nih.gov/genomes/all/GCA/001/531/365/GCA_001531365.1_CcrdV1
518	Silybum marianum	ftp://ftp.ncbi.nlm.nih.gov/genomes/all/GCA/001/541/825/GCA_001541825.1_ASM154182v1	SAMN04161469	PRJNA251972	GCA_001541825.1	Contig	1477.57	37.2		LMWD01	258575	2016-01-26T00:00:00Z	ftp://ftp.ncbi.nlm.nih.gov/genomes/all/GCA/001/541/825/GCA_001541825.1_ASM154182v1
519	Carthamus tinctorius	ftp://ftp.ncbi.nlm.nih.gov/genomes/all/GCA/001/633/085/GCA_001633085.1_Safflower1	SAMN04523257	PRJNA313459	GCA_001633085.1	Scaffold	661.938	36.5		LUCG01	463906	2016-04-27T00:00:00Z	ftp://ftp.ncbi.nlm.nih.gov/genomes/all/GCA/001/633/085/GCA_001633085.1_Safflower1
520	Lactuca sativa	ftp://ftp.ncbi.nlm.nih.gov/genomes/all/GCF/002/870/075/GCF_002870075.1_Lsat_Salinas_v7	SAMN01730979	PRJNA432228	GCA_002870075.1	Scaffold	2384.19	38.6999	chloroplast Pltd:NC_007578.1/	NBSK01	11453	2018-01-09T00:00:00Z	ftp://ftp.ncbi.nlm.nih.gov/genomes/all/GCA/002/870/075/GCA_002870075.1_Lsat_Salinas_v7
521	Codonopsis pilosula	ftp://ftp.ncbi.nlm.nih.gov/genomes/all/GCA/004/523/855/GCA_004523855.1_ASM452385v1
522	Platycodon grandiflorus	ftp://ftp.ncbi.nlm.nih.gov/genomes/all/GCA/004/681/165/GCA_004681165.1_RDA_PgrJ_v1	SAMN11104589	PRJNA526590	GCA_004681165.1	Scaffold	680.178	36.3		SPEA01	4816	2019-04-05T00:00:00Z	ftp://ftp.ncbi.nlm.nih.gov/genomes/all/GCA/004/681/165/GCA_004681165.1_RDA_PgrJ_v1
523	Foeniculum vulgare	ftp://ftp.ncbi.nlm.nih.gov/genomes/all/GCA/003/724/115/GCA_003724115.1_FoenVul1.0	SAMN07983892	PRJNA419638	GCA_003724115.1	Scaffold	1010.97	32.2		PHNY01	300377	2018-11-13T00:00:00Z	ftp://ftp.ncbi.nlm.nih.gov/genomes/all/GCA/003/724/115/GCA_003724115.1_FoenVul1.0
524	Daucus carota	ftp://ftp.ncbi.nlm.nih.gov/genomes/all/GCF/001/625/215/GCF_001625215.1_ASM162521v1	SAMN03216637	PRJNA326436	GCA_001625215.1	Chromosome	421.539	36.0427	chromosome 1:NC_030381.1/CM004278.1; chromosome 2:NC_030382.1/CM004279.1; chromosome 3:NC_030383.1/CM004280.1; chromosome 4:NC_030384.1/CM004281.1; chromosome 5:NC_030385.1/CM004282.1; chromosome 6:NC_030386.1/CM004283.1; chromosome 7:NC_030387.1/CM004284.1; chromosome 8:NC_030388.1/CM004285.1; chromosome 9:NC_030389.1/CM004286.1; chloroplast Pltd:NC_008325.1/CM004358.1; mitochondrion MT:NC_01785…	LNRQ01	4826	2016-04-20T00:00:00Z	ftp://ftp.ncbi.nlm.nih.gov/genomes/all/GCF/001/625/215/GCF_001625215.1_ASM162521v1
525	Oenanthe javanica	ftp://ftp.ncbi.nlm.nih.gov/genomes/all/GCA/008/931/105/GCA_008931105.1_ASM893110v1	SAMN09739212	PRJNA483449	GCA_008931105.1	Scaffold	1278.51	30.9		QRFB01	149923	2019-10-09T00:00:00Z	ftp://ftp.ncbi.nlm.nih.gov/genomes/all/GCA/008/931/105/GCA_008931105.1_ASM893110v1

## Sheet: 1a Data source error
Supplementary Table 1a The basic information of plant genome
Species clade	NO	Species name	Genome download website	BioSample	BioProject	Assembly Identifier	Assembly Level	GC%	Replicons	WGS	Release Date	Gene down website	Genome size	Scaffolds number	Average Scaffold length	Median length	N00	N10	N20	N30	N40	N50	N60	N70	N80	N90	N100
01_Alage	1	Chloropicon primus	ftp://ftp.ncbi.nlm.nih.gov/genomes/all/GCA/007/859/695/GCA_007859695.1_ASM785969v1	SAMN04584780	PRJNA316521	GCA_007859695.1	Complete	57.511	chromosome 1:CP031034.1; chromosome 2:CP031035.1; chromosome 3:CP031036.1; chromosome 4:CP031037.1; chromosome 5:CP031038.1; chromosome 6:CP031039.1; chromosome 7:CP031040.1; chromosome 8:CP031041.1; chromosome 9:CP031042.1; chromosome 10:CP031043.1; chromosome 11:CP031044.1; chromosome 12:CP031045.1; chromosome 13:CP031046.1; chromosome 14:CP031047.1; chromosome 15:CP031048.1; chromosome 16:CP03…		2019-08-07T00:00:00Z	ftp://ftp.ncbi.nlm.nih.gov/genomes/all/GCA/007/859/695/GCA_007859695.1_ASM785969v1	17400691	20	870035	725311	1876603	1876603	1764478	1467028	1105792	1089399	781388	725311	585392	498022	368919
01_Alage	2	Edaphochlamys debaryana	ftp://ftp.ncbi.nlm.nih.gov/genomes/all/GCA/001/662/405/GCA_001662405.1_Cde_assembly01	SAMD00049915	PRJDB4711	GCA_001662405.1	Scaffold	62.3		BDDB01	2016-04-22T00:00:00Z	ftp://ftp.ncbi.nlm.nih.gov/genomes/all/GCA/001/662/405/GCA_001662405.1_Cde_assembly01	120364444	10139	11871.4	5110	262958	86114	60278	46861	36254	27219	20299	14699	9703	5036	1000
01_Alage	3	Bathycoccus prasinos	ftp://ftp.ncbi.nlm.nih.gov/genomes/all/GCF/002/220/235/GCF_002220235.1_ASM222023v1		PRJEA71363	GCA_002220235.1	Chromosome	48.024	chromosome 1:NC_024008.1/FO082278.1; chromosome 2:NC_024007.1/FO082277.1; chromosome 3:NC_024006.1/FO082276.1; chromosome 4:NC_024005.1/FO082275.1; chromosome 5:NC_024004.1/FO082274.1; chromosome 6:NC_024003.1/FO082273.1; chromosome 7:NC_024002.1/FO082272.1; chromosome 8:NC_024001.1/FO082271.1; chromosome 9:NC_024000.1/FO082270.1; chromosome 10:NC_023999.1/FO082269.1; chromosome 11:NC_023998.1/FO…		2012-06-21T00:00:00Z	ftp://ftp.ncbi.nlm.nih.gov/genomes/all/GCF/002/220/235/GCF_002220235.1_ASM222023v1	15074320	21	717825	741603	1352724	1122692	1091008	1037991	989707	955652	895536	741603	708035	494108	43614
01_Alage	4	Ostreococcus tauri	ftp://ftp.ncbi.nlm.nih.gov/genomes/all/GCF/000/214/015/GCF_000214015.3_version_140606	SAMEA3138397	PRJNA12912	GCA_000214015.2	Chromosome	59.1984	chromosome 1:NC_014426.2/CAID01000001.2; chromosome 2:NC_014427.2/CAID01000002.2; chromosome 3:NC_014428.2/CAID01000003.2; chromosome 4:NC_014429.2/CAID01000004.2; chromosome 5:NC_014430.2/CAID01000005.2; chromosome 6:NC_014431.2/CAID01000006.2; chromosome 7:NC_014432.2/CAID01000007.2; chromosome 8:NC_014433.2/CAID01000008.2; chromosome 9:NC_014434.2/CAID01000009.2; chromosome 10:NC_014435.2/CAID…	CAID01	2010-10-15T00:00:00Z	ftp://ftp.ncbi.nlm.nih.gov/genomes/all/GCA/000/214/015/GCA_000214015.2_version_140606	13032761	22	592398	549623	1096037	1074072	997348	944948	793623	717457	713054	591496	542657	511330	44237
01_Alage	5	Micromonas	ftp://ftp.ncbi.nlm.nih.gov/genomes/all/GCA/001/430/725/GCA_001430725.1_ASM143072v1	SAMN03380213	PRJNA276743	GCA_001430725.1	Scaffold	59.2		LAQG01	2015-04-28T00:00:00Z		13204888	1069	628804	613585	1152508	982987	930724	847696	818664	708927	670853	593542	538963	428333	149386
01_Alage	6	Micromonas commoda	ftp://ftp.ncbi.nlm.nih.gov/genomes/all/GCF/000/090/985/GCF_000090985.2_ASM9098v2	SAMN03081421	PRJNA15676	GCA_000090985.2	Complete	63.8223	chromosome 1:NC_013038.1/CP001574.1; chromosome 2:NC_013039.1/CP001323.1; chromosome 3:NC_013040.1/CP001324.1; chromosome 4:NC_013041.1/CP001325.1; chromosome 5:NC_013042.1/CP001326.1; chromosome 6:NC_013043.1/CP001327.1; chromosome 7:NC_013044.1/CP001328.1; chromosome 8:NC_013045.1/CP001575.1; chromosome 9:NC_013046.1/CP001329.1; chromosome 10:NC_013047.1/CP001576.1; chromosome 11:NC_013048.1/CP…		2009-04-10T00:00:00Z	ftp://ftp.ncbi.nlm.nih.gov/genomes/all/GCA/000/090/985/GCA_000090985.2_ASM9098v2	19582411	19	18318.4	14314	92272	51279	39581	32659	26620	22484	18184	15185	12184	9544	6005
01_Alage	7	Micromonas pusilla	ftp://ftp.ncbi.nlm.nih.gov/genomes/all/GCF/000/151/265/GCF_000151265.2_Micromonas_pusilla_CCMP1545_v2.0	SAMN02953743	PRJNA15678	GCA_000151265.1	Scaffold	65.7		ACCP01	2009-04-07T00:00:00Z	ftp://ftp.ncbi.nlm.nih.gov/genomes/all/GCF/000/151/265/GCF_000151265.2_Micromonas_pusilla_CCMP1545_v2.0	21109336	21	1.11102e+06	1160640	2053059	1914325	1759951	1584431	1518631	1394110	1276107	1160640	1084119	832468	47425
01_Alage	8	Bathycoccus	ftp://ftp.ncbi.nlm.nih.gov/genomes/all/GCA/900/128/745/GCA_900128745.1_TOSAG39-1	SAMEA3727691	PRJEB6603	GCA_900128745.1	Scaffold	47.3		FQSR01	2016-11-26T00:00:00Z		21958260	2118	1.04563e+06	952308	2211167	2211167	1965373	1602726	1532348	1183541	1116513	952308	892804	777317	5431
01_Alage	9	unclassified Mamiellophyceae	ftp://ftp.ncbi.nlm.nih.gov/genomes/all/GCA/004/115/355/GCA_004115355.1_Halite_2017MT	SAMN10615470	PRJNA510804	GCA_004115355.1	Scaffold	55.2		RZXY01	2019-01-28T00:00:00Z		10057911	2200	4748.78	1237	110906	51352	38657	28235	19982	14082	9915	6866	4465	1729	500
01_Alage	10	Cymbomonas tetramitiformis	ftp://ftp.ncbi.nlm.nih.gov/genomes/all/GCA/001/247/695/GCA_001247695.1_ASM124769v1	SAMN03799721	PRJNA286761	GCA_001247695.1	Scaffold	48.9		LGRX01	2015-08-05T00:00:00Z	ftp://ftp.ncbi.nlm.nih.gov/genomes/all/GCA/001/247/695/GCA_001247695.1_ASM124769v1	10283426	40243	4674.28	3560	64516	13967	10934	8717	7231	5971	4923	3950	3136	2304	1001
01_Alage	11	Chlamydomonas	ftp://ftp.ncbi.nlm.nih.gov/genomes/all/GCA/004/335/715/GCA_004335715.1_ASM433571v1	SAMN08335857	PRJNA428298	GCA_004335715.1	Scaffold	66.9		QAXL01	2019-03-08T00:00:00Z		281270454	9862	6989.3	4780	211102	30721	21976	17040	13597	10932	8785	6880	5217	3378	890
01_Alage	12	Chlamydomonas applanata	ftp://ftp.ncbi.nlm.nih.gov/genomes/all/GCA/001/662/365/GCA_001662365.1_Cap_assembly01	SAMD00049913	PRJDB4711	GCA_001662365.1	Scaffold	56.3		BDCZ01	2016-04-22T00:00:00Z	ftp://ftp.ncbi.nlm.nih.gov/genomes/all/GCA/001/662/365/GCA_001662365.1_Cap_assembly01	114119837	2533	11571.7	5642	155080	74359	53024	40549	31624	24298	18324	13405	9054	4972	463
01_Alage	13	Chlamydomonas applanata	ftp://ftp.ncbi.nlm.nih.gov/genomes/all/GCA/001/662/365/GCA_001662365.1_Cap_assembly01	SAMD00049913	PRJDB4711	GCA_001662365.1	Scaffold	56.3		BDCZ01	2016-04-22T00:00:00Z		78504178	2533	30992.6	7767	644638	300614	214890	167720	137075	105699	80424	54110	35443	15649	1002
01_Alage	14	Chlamydomonas asymmetrica	ftp://ftp.ncbi.nlm.nih.gov/genomes/all/GCA/001/662/385/GCA_001662385.1_Cas_assembly01	SAMD00049914	PRJDB4711	GCA_001662385.1	Scaffold	55.1		BDDA01	2016-04-22T00:00:00Z	ftp://ftp.ncbi.nlm.nih.gov/genomes/all/GCA/001/662/385/GCA_001662385.1_Cas_assembly01	141916335	4102	34596.9	7997	888611	328616	230072	181531	139879	114158	86501	64367	43042	20208	1000
01_Alage	15	Chlamydomonas debaryana	ftp://ftp.ncbi.nlm.nih.gov/genomes/all/GCA/001/662/405/GCA_001662405.1_Cde_assembly01	SAMD00049915	PRJDB4711	GCA_001662405.1	Scaffold	62.3		BDDB01	2016-04-22T00:00:00Z	ftp://ftp.ncbi.nlm.nih.gov/genomes/all/GCA/001/662/405/GCA_001662405.1_Cde_assembly01	120364444	10139	11871.4	5110	262958	86114	60278	46861	36254	27219	20299	14699	9703	5036	1000
01_Alage	16	Chlamydomonas eustigma	ftp://ftp.ncbi.nlm.nih.gov/genomes/all/GCA/002/335/675/GCA_002335675.1_C.eustigma_genome_v1.0	SAMD00071608	PRJDB5468	GCA_002335675.1	Scaffold	43.7		BEGY01	2017-08-31T20:51:00Z	ftp://ftp.ncbi.nlm.nih.gov/genomes/all/GCA/002/335/675/GCA_002335675.1_C.eustigma_genome_v1.0	66629526	520	128134	19432	2081875	1226825	909863	726773	598415	465125	377172	282527	177064	88813	2004
01_Alage	17	Chlamydomonas reinhardtii	ftp://ftp.ncbi.nlm.nih.gov/genomes/all/GCF/000/002/595/GCF_000002595.1_v3.0	SAMN02953692	PRJNA12260	GCA_000002595.2	Scaffold	61.9512	mitochondrion MT:NC_001638.1/; chloroplast Pltd:NC_005353.1/	ABCN01	2007-08-03T00:00:00Z	ftp://ftp.ncbi.nlm.nih.gov/genomes/all/GCA/000/002/595/GCA_000002595.2_v3.0	120404952	1558	77281.7	4333	6494944	3180379	2811283	2215130	2020544	1695175	1244625	873095	480678	153119	798
01_Alage	18	Chlamydomonas sphaeroides	ftp://ftp.ncbi.nlm.nih.gov/genomes/all/GCA/001/662/425/GCA_001662425.1_Csp_assembly01	SAMD00049916	PRJDB4711	GCA_001662425.1	Scaffold	65.9		BDDC01	2016-04-22T00:00:00Z	ftp://ftp.ncbi.nlm.nih.gov/genomes/all/GCA/001/662/425/GCA_001662425.1_Csp_assembly01	122189241	6890	17734.3	6869	403447	128567	91286	71742	56739	44734	33927	25201	16192	8364	1000
01_Alage	19	Chloromonas	ftp://ftp.ncbi.nlm.nih.gov/genomes/all/GCA/004/335/635/GCA_004335635.1_ASM433563v1	SAMN08335861	PRJNA428298	GCA_004335635.1	Scaffold	52.6		QAXH01	2019-03-08T00:00:00Z		102365718	6822	15005.2	6889	226242	86300	64965	50147	40639	32535	25382	19308	13037	6751	1001
01_Alage	20	Eudorina	ftp://ftp.ncbi.nlm.nih.gov/genomes/all/GCA/003/117/195/GCA_003117195.1_EudorinaFemale_1.0	SAMD00022973	PRJDB3310	GCA_003117195.1	Scaffold	61		BDSI01	2018-04-06T21:43:00Z		184032255	3180	57871.8	15294	2764720	1865746	1322119	1058083	796939	564035	370240	168340	21891	14902	10003
01_Alage	21	Gonium pectorale	ftp://ftp.ncbi.nlm.nih.gov/genomes/all/GCA/001/584/585/GCA_001584585.1_ASM158458v1	SAMN04493491	PRJNA302163	GCA_001584585.1	Scaffold	51		LSYV01	2016-03-09T00:00:00Z	ftp://ftp.ncbi.nlm.nih.gov/genomes/all/GCA/001/584/585/GCA_001584585.1_ASM158458v1	148806073	2373	62708	5885	6378020	4222114	3467589	2469809	1589639	1267136	986167	660553	276361	30718	2000
01_Alage	22	Volvox carteri	ftp://ftp.ncbi.nlm.nih.gov/genomes/all/GCF/000/143/455/GCF_000143455.1_v1.0	SAMN02953753	PRJNA13109	GCA_000143455.1	Scaffold	55.3		ACJH01	2010-07-06T00:00:00Z	ftp://ftp.ncbi.nlm.nih.gov/genomes/all/GCF/000/143/455/GCF_000143455.1_v1.0	137684403	1251	110059	6497	5981844	2765396	2191866	2038975	1648468	1491501	1130383	903395	617559	224601	990
01_Alage	23	Yamagishiella unicocca	ftp://ftp.ncbi.nlm.nih.gov/genomes/all/GCA/003/116/995/GCA_003116995.1_YamagishiellaPlus_1.0	SAMD00056693	PRJDB5042	GCA_003116995.1	Contig	61		BDSL01	2018-04-06T20:58:00Z	ftp://ftp.ncbi.nlm.nih.gov/genomes/all/GCA/003/116/995/GCA_003116995.1_YamagishiellaPlus_1.0	134234618	1461	91878.6	16595	3483123	2387156	1608834	1150804	890278	666310	545917	375425	149925	19724	10011
01_Alage	24	Haematococcus	ftp://ftp.ncbi.nlm.nih.gov/genomes/all/GCA/004/335/575/GCA_004335575.1_ASM433557v1	SAMN08335866	PRJNA428298	GCA_004335575.1	Scaffold	54.8		QAXD01	2019-03-08T00:00:00Z		77829956	303	256865	94235	3822909	1845754	1093135	860090	724908	591061	538950	431719	326760	166564	5010
01_Alage	25	Haematococcus lacustris	ftp://ftp.ncbi.nlm.nih.gov/genomes/all/GCA/003/970/955/GCA_003970955.1_ASM397095v1	SAMN09912191	PRJNA487914	GCA_003970955.1	Contig	59.3		QXTD01	2018-12-17T00:00:00Z	ftp://ftp.ncbi.nlm.nih.gov/genomes/all/GCA/003/970/955/GCA_003970955.1_ASM397095v1	365773732	104856	3488.34	836	144668	36565	26368	20058	15646	11925	8852	6268	3863	1695	201
01_Alage	26	Characiochloris	ftp://ftp.ncbi.nlm.nih.gov/genomes/all/GCA/004/335/845/GCA_004335845.1_ASM433584v1	SAMN08335852	PRJNA428298	GCA_004335845.1	Scaffold	53.3		QAXP01	2019-03-08T00:00:00Z	ftp://ftp.ncbi.nlm.nih.gov/genomes/all/GCA/004/335/845/GCA_004335845.1_ASM433584v1	95477124	6685	14282.3	7415	189843	76509	56525	44263	35992	28672	22434	17032	11469	6333	1020
01_Alage	27	Dunaliella	ftp://ftp.ncbi.nlm.nih.gov/genomes/all/GCA/004/335/885/GCA_004335885.1_ASM433588v1	SAMN08335862	PRJNA428298	GCA_004335885.1	Scaffold	40.3		QFBH01	2019-03-08T00:00:00Z		25538156	1189	21478.7	30554	32757	32757	32757	32757	32757	32757	32721	31530	29424	20361	750
01_Alage	28	Dunaliella salina	ftp://ftp.ncbi.nlm.nih.gov/genomes/all/GCA/002/284/615/GCA_002284615.1_Dsal_v1.0	SAMN02746051	PRJNA32771	GCA_002284615.1	Scaffold	40.1		NSFN01	2017-08-31T00:00:00Z	ftp://ftp.ncbi.nlm.nih.gov/genomes/all/GCA/002/284/615/GCA_002284615.1_Dsal_v1.0	343704028	5512	62355.6	4950	1550595	770075	611330	505764	419881	353034	280020	202493	136481	66073	1000
01_Alage	29	Tetrabaena socialis	ftp://ftp.ncbi.nlm.nih.gov/genomes/all/GCA/002/891/735/GCA_002891735.1_TetSoc1	SAMN07332538	PRJNA393411	GCA_002891735.1	Scaffold	47.7		PGGS01	2018-01-18T00:00:00Z	ftp://ftp.ncbi.nlm.nih.gov/genomes/all/GCA/002/891/735/GCA_002891735.1_TetSoc1	135779852	5856	23186.5	1964	696530	389723	311192	242895	188068	145927	114043	79166	44798	15108	881
01_Alage	30	Mychonastes homosphaera	ftp://ftp.ncbi.nlm.nih.gov/genomes/all/GCA/009/193/075/GCA_009193075.1_ASM919307v1	SAMN12340813	PRJNA556117	GCA_009193075.1	Contig	72.4		VXJC01	2019-10-21T00:00:00Z	ftp://ftp.ncbi.nlm.nih.gov/genomes/all/GCA/009/193/075/GCA_009193075.1_ASM919307v1	24204206	30	806807	93254	2973032	2973032	2881060	2561949	2295897	2001712	1853973	1538233	1048672	984720	6821
01_Alage	31	Messastrum gracile	ftp://ftp.ncbi.nlm.nih.gov/genomes/all/GCA/008/037/345/GCA_008037345.1_MG_SEMC4_Ver1.0	SAMN12111213	PRJNA550185	GCA_008037345.1	Scaffold	70		VIYE01	2019-08-20T00:00:00Z	ftp://ftp.ncbi.nlm.nih.gov/genomes/all/GCA/008/037/345/GCA_008037345.1_MG_SEMC4_Ver1.0	60662915	32473	1868.1	1178	52109	8435	6041	4725	3726	2922	2299	1753	1269	809	202
01_Alage	32	Monoraphidium	ftp://ftp.ncbi.nlm.nih.gov/genomes/all/GCA/002/814/315/GCA_002814315.1_ASM281431v1	SAMN07326317	PRJNA392383	GCA_002814315.1	Contig	51.2		NMUB01	2017-12-08T00:00:00Z		74658904	1851	40334.4	13460	513056	313636	219509	163081	133927	105989	84250	64348	48673	29074	1000
01_Alage	33	Monoraphidium neglectum	ftp://ftp.ncbi.nlm.nih.gov/genomes/all/GCF/000/611/645/GCF_000611645.1_mono_v1	SAMN02981574	PRJNA293989	GCA_000611645.1	Scaffold	64.1131	mitochondrion MT:NW_014013625.1/CM002677.1; chloroplast CP:NW_014013626.1/CM002678.1	AYTC01	2014-03-28T00:00:00Z	ftp://ftp.ncbi.nlm.nih.gov/genomes/all/GCA/000/611/645/GCA_000611645.1_mono_v1	69711829	6720	10373.8	6878	135362	40859	31152	24473	19543	15659	12328	9523	6999	4562	2001
01_Alage	34	Raphidocelis subcapitata	ftp://ftp.ncbi.nlm.nih.gov/genomes/all/GCA/003/203/535/GCA_003203535.1_Rsub_1.0	SAMD00078043	PRJDB5653	GCA_003203535.1	Scaffold	70		BDRX01	2018-05-30T00:00:00Z	ftp://ftp.ncbi.nlm.nih.gov/genomes/all/GCA/003/203/535/GCA_003203535.1_Rsub_1.0	51162697	300	170542	96813	1436602	796354	587661	520854	451259	341804	276923	215860	156084	93853	5111
01_Alage	35	Desmodesmus armatus	ftp://ftp.ncbi.nlm.nih.gov/genomes/all/GCA/007/449/985/GCA_007449985.1_DaSE107_hybrid_PB-I	SAMN11569667	PRJNA540980	GCA_007449985.1	Contig	56.6		VIIQ01	2019-07-25T00:00:00Z	ftp://ftp.ncbi.nlm.nih.gov/genomes/all/GCA/007/449/985/GCA_007449985.1_DaSE107_hybrid_PB-I	115870282	528	219451	62828	3082232	1763181	1468238	1105316	828446	670383	510402	369383	231135	124145	1428
01_Alage	36	Scenedesmus	ftp://ftp.ncbi.nlm.nih.gov/genomes/all/GCA/004/335/835/GCA_004335835.1_ASM433583v1	SAMN08335872	PRJNA428298	GCA_004335835.1	Scaffold	56.8		RWJK01	2019-03-08T00:00:00Z		93238253	1984	46995.1	29637	442878	197165	150826	114236	96880	79822	63078	48764	35802	21279	5047
01_Alage	37	Scenedesmus quadricauda	ftp://ftp.ncbi.nlm.nih.gov/genomes/all/GCA/002/317/545/GCA_002317545.1_ASM231754v1	SAMN07360942	PRJNA394817	GCA_002317545.1	Contig	63.2		NNCB01	2017-09-20T00:00:00Z	ftp://ftp.ncbi.nlm.nih.gov/genomes/all/GCA/002/317/545/GCA_002317545.1_ASM231754v1	65353879	13425	4868.07	3102	68181	21989	16096	12513	10112	8094	6413	4939	3592	2342	201
01_Alage	38	Scenedesmus vacuolatus	ftp://ftp.ncbi.nlm.nih.gov/genomes/all/GCA/004/764/505/GCA_004764505.1_UFZ-Svac-1.0	SAMN10291121	PRJNA498405	GCA_004764505.1	Contig	53.6		RHEI01	2019-04-09T00:00:00Z	ftp://ftp.ncbi.nlm.nih.gov/genomes/all/GCA/004/764/505/GCA_004764505.1_UFZ-Svac-1.0	23358248	20139	1159.85	848	10039	3787	2838	2283	1887	1571	1300	1035	781	543	200
01_Alage	39	Coelastrella	ftp://ftp.ncbi.nlm.nih.gov/genomes/all/GCA/001/630/525/GCA_001630525.1_ASM163052v1	SAMN04497931	PRJNA306811	GCA_001630525.1	Contig	51.8		LWCB01	2016-04-25T00:00:00Z		80221759	16225	4944.33	2868	53713	23076	17362	13948	11470	9337	7504	5759	4153	2360	223
01_Alage	40	Tetradesmus obliquus	ftp://ftp.ncbi.nlm.nih.gov/genomes/all/GCA/900/108/755/GCA_900108755.1_sob1	SAMEA4502842	PRJEB15865	GCA_900108755.1	Scaffold	56.8		FNXT01	2016-11-02T00:00:00Z	ftp://ftp.ncbi.nlm.nih.gov/genomes/all/GCA/900/108/755/GCA_900108755.1_sob1	107715903	1368	78739.7	35936	1112289	469512	354265	268468	228018	186615	144598	111476	81175	47996	502
01_Alage	41	Tetraselmis striata	ftp://ftp.ncbi.nlm.nih.gov/genomes/all/GCA/006/384/855/GCA_006384855.1_TSEL_PacBio_SMRT	SAMN11613237	PRJNA542153	GCA_006384855.1	Contig	57.9		VCJN01	2019-06-21T00:00:00Z	ftp://ftp.ncbi.nlm.nih.gov/genomes/all/GCA/006/384/855/GCA_006384855.1_TSEL_PacBio_SMRT	227954216	3613	63092.8	34028	725124	317833	248982	195282	158552	126807	101261	76426	55524	31164	710
01_Alage	42	Picocystis	ftp://ftp.ncbi.nlm.nih.gov/genomes/all/GCA/003/665/715/GCA_003665715.1_OU_Pico_1.0	SAMN10038529	PRJNA490491	GCA_003665715.1	Contig	53.6		QYZS01	2018-10-16T00:00:00Z		29646247	318	93227.2	50252	776588	628999	483601	440834	252953	153916	95120	70031	52670	42387	1781
01_Alage	43	Ulva mutabilis	ftp://ftp.ncbi.nlm.nih.gov/genomes/all/GCA/900/538/255/GCA_900538255.1_Ulvmu_WT_fa	SAMEA104719794	PRJEB25750	GCA_900538255.1	Scaffold	57.1		UNSF01	2018-09-12T00:00:00Z	ftp://ftp.ncbi.nlm.nih.gov/genomes/all/GCA/900/538/255/GCA_900538255.1_Ulvmu_WT_fa	98484689	318	309700	157294	3623364	1627693	1318335	1088738	760374	600008	497944	392060	273527	156218	1619
01_Alage	44	Ulva prolifera	ftp://ftp.ncbi.nlm.nih.gov/genomes/all/GCA/004/138/255/GCA_004138255.1_ASM413825v1	SAMN09766007	PRJNA484545	GCA_004138255.1	Scaffold	55.1		SDUY01	2019-02-05T00:00:00Z	ftp://ftp.ncbi.nlm.nih.gov/genomes/all/GCA/004/138/255/GCA_004138255.1_ASM413825v1	87889290	597	147218	22756	2662757	1565776	1265765	1099536	910331	675063	496348	351947	206526	92953	237
01_Alage	45	Parachlorella kessleri	ftp://ftp.ncbi.nlm.nih.gov/genomes/all/GCA/001/598/975/GCA_001598975.1_PK2152_assembly	SAMD00025188	PRJDB3487	GCA_001598975.1	Contig	58.3		BBXU01	2015-12-19T00:00:00Z	ftp://ftp.ncbi.nlm.nih.gov/genomes/all/GCA/001/598/975/GCA_001598975.1_PK2152_assembly	59187803	3651	16211.4	8208	198966	88916	62043	51593	42547	33885	26000	19287	13454	7427	20
01_Alage	46	Helicosporidium	ftp://ftp.ncbi.nlm.nih.gov/genomes/all/GCA/000/690/575/GCA_000690575.1_Helico_v1.0	SAMN02384563	PRJNA188927	GCA_000690575.1	Contig	61.7		AYPS01	2014-05-13T00:00:00Z		12373820	5666	2183.87	1578	24678	7216	5691	4553	3697	3036	2505	1967	1496	1019	500
01_Alage	47	Auxenochlorella pyrenoidosa	ftp://ftp.ncbi.nlm.nih.gov/genomes/all/GCA/001/430/745/GCA_001430745.1_ASM143074v1	SAMN02954480	PRJNA171991	GCA_001430745.1	Scaffold	64		ANZC01	2015-11-03T00:00:00Z	ftp://ftp.ncbi.nlm.nih.gov/genomes/all/GCA/001/430/745/GCA_001430745.1_ASM143074v1	56992954	1346	42342.5	2926	3905163	2955388	2321867	1849050	1688559	1392758	1242750	678756	443866	210298	1999
01_Alage	48	Auxenochlorella protothecoides	ftp://ftp.ncbi.nlm.nih.gov/genomes/all/GCF/000/733/215/GCF_000733215.1_ASM73321v1	SAMN02433493	PRJNA182710	GCA_000733215.1	Scaffold	62.8		APJO01	2014-07-23T00:00:00Z	ftp://ftp.ncbi.nlm.nih.gov/genomes/all/GCA/000/733/215/GCA_000733215.1_ASM73321v1	22924637	374	61295.8	1985	1144356	726431	597311	435071	345611	285543	247289	203194	152256	87711	200
01_Alage	49	Micractinium conductrix	ftp://ftp.ncbi.nlm.nih.gov/genomes/all/GCA/002/245/815/GCA_002245815.2_ASM224581v2	SAMN03863807	PRJNA290385	GCA_002245815.2	Contig	67.1615	mitochondrion MT:CM009643.1; chloroplast Pltd:CM009644.1	LHPF02	2017-08-10T00:00:00Z	ftp://ftp.ncbi.nlm.nih.gov/genomes/all/GCA/002/245/815/GCA_002245815.2_ASM224581v2	61018900	300	203396	19676	5958903	4282644	2733465	2430495	1600264	1210495	1010328	730215	460904	172407	1284
01_Alage	50	Chlorella sorokiniana	ftp://ftp.ncbi.nlm.nih.gov/genomes/all/GCA/003/130/725/GCA_003130725.1_ASM313072v1	SAMN08200531	PRJNA422912	GCA_003130725.1	Chromosome	63.827	chromosome 5:CM009865.1; chromosome 6:CM009866.1; chromosome 8:CM009867.1; chromosome 10:CM009868.1; chromosome 11:CM009869.1; chromosome 12:CM009870.1	PKFC01	2018-05-17T00:00:00Z	ftp://ftp.ncbi.nlm.nih.gov/genomes/all/GCA/003/130/725/GCA_003130725.1_ASM313072v1	58534920	20	2926746	3196984	5120617	4729772	4353047	4329336	4172216	4091730	3786744	3448384	2910162	2671961	57538
01_Alage	51	Chlorella variabilis	ftp://ftp.ncbi.nlm.nih.gov/genomes/all/GCF/000/147/415/GCF_000147415.1_v_1.0	SAMN02744065	PRJNA45853	GCA_000147415.1	Scaffold	65.5		ADIC01	2010-08-31T00:00:00Z	ftp://ftp.ncbi.nlm.nih.gov/genomes/all/GCA/000/147/415/GCA_000147415.1_v_1.0	46159512	414	111496	2654	3119887	2568509	2291561	2058122	1632337	1469606	1237014	1056282	788999	415506	1000
01_Alage	52	Chlorella vulgaris	ftp://ftp.ncbi.nlm.nih.gov/genomes/all/GCA/001/021/125/GCA_001021125.1_ASM102112v1	SAMN03453227	PRJNA278897	GCA_001021125.1	Scaffold	61.5		LDKB01	2015-06-05T00:00:00Z	ftp://ftp.ncbi.nlm.nih.gov/genomes/all/GCA/001/021/125/GCA_001021125.1_ASM102112v1	37342230	3600	10372.8	3578	232202	96624	63784	45386	35997	27824	21684	15985	10472	5844	200
01_Alage	53	Prototheca bovis	ftp://ftp.ncbi.nlm.nih.gov/genomes/all/GCA/003/612/995/GCA_003612995.1_ASM361299v1	SAMN07183812	PRJNA388740	GCA_003612995.1	Contig	73.5		PGFX01	2018-10-04T00:00:00Z	ftp://ftp.ncbi.nlm.nih.gov/genomes/all/GCA/003/612/995/GCA_003612995.1_ASM361299v1	24744895	4555	5432.47	3680	57068	21721	15559	12215	9706	7940	6481	5057	3700	2447	240
01_Alage	54	Prototheca ciferrii	ftp://ftp.ncbi.nlm.nih.gov/genomes/all/GCA/003/613/005/GCA_003613005.1_ASM361300v1	SAMN07183811	PRJNA388740	GCA_003613005.1	Scaffold	66.3		PEIA01	2018-10-04T00:00:00Z	ftp://ftp.ncbi.nlm.nih.gov/genomes/all/GCA/003/613/005/GCA_003613005.1_ASM361300v1	26448891	6956	3802.31	1881	97625	25252	18648	13538	10076	7016	4733	2986	2055	1425	404
01_Alage	55	Prototheca cutis	ftp://ftp.ncbi.nlm.nih.gov/genomes/all/GCA/002/897/115/GCA_002897115.1_JCM_15793_assembly_v001	SAMD00028389	PRJDB3669	GCA_002897115.1	Scaffold	60.2		BCIH01	2017-11-16T00:00:00Z	ftp://ftp.ncbi.nlm.nih.gov/genomes/all/GCA/002/897/115/GCA_002897115.1_JCM_15793_assembly_v001	19969220	29	688594	437359	2465851	2465851	2322282	1750878	1598030	1409608	1237809	1025185	843373	445495	5158
01_Alage	56	Prototheca stagnorum	ftp://ftp.ncbi.nlm.nih.gov/genomes/all/GCA/002/794/665/GCA_002794665.1_JCM_9641_assembly_v001	SAMD00028436	PRJDB3715	GCA_002794665.1	Scaffold	71.4		BCJY01	2017-11-16T00:00:00Z	ftp://ftp.ncbi.nlm.nih.gov/genomes/all/GCA/002/794/665/GCA_002794665.1_JCM_9641_assembly_v001	16896228	27	625786	800314	1567793	1543038	1509310	1463652	1292157	1107247	983240	969357	832301	800314	949
01_Alage	57	Prototheca wickerhamii	ftp://ftp.ncbi.nlm.nih.gov/genomes/all/GCA/003/255/715/GCA_003255715.1_ASM325571v1	SAMN08930906	PRJNA338014	GCA_003255715.1	Scaffold	61.4745	mitochondrion MT:CM009948.1; plastid Pltd:CM009949.1	QBLF01	2018-05-11T00:00:00Z	ftp://ftp.ncbi.nlm.nih.gov/genomes/all/GCA/003/255/715/GCA_003255715.1_ASM325571v1	27691062	3774	7337.32	1805	153746	86595	65959	50439	38763	31154	22640	14002	5906	1939	1001
01_Alage	58	Prototheca zopfii	ftp://ftp.ncbi.nlm.nih.gov/genomes/all/GCA/003/612/995/GCA_003612995.1_ASM361299v1	SAMN07183812	PRJNA388740	GCA_003612995.1	Contig	73.5		PGFX01	2018-10-04T00:00:00Z	ftp://ftp.ncbi.nlm.nih.gov/genomes/all/GCA/003/612/995/GCA_003612995.1_ASM361299v1	24744895	4555	5432.47	3680	57068	21721	15559	12215	9706	7940	6481	5057	3700	2447	240
01_Alage	59	Chloroidium	ftp://ftp.ncbi.nlm.nih.gov/genomes/all/GCA/004/335/625/GCA_004335625.1_ASM433562v1	SAMN08335859	PRJNA428298	GCA_004335625.1	Scaffold	50.3		QAXJ01	2019-03-08T00:00:00Z		54312065	72	754334	9426	5870578	5870578	3491687	3347102	2850432	2512641	2417767	2035888	1641169	953620	1010
01_Alage	60	Chlorella	ftp://ftp.ncbi.nlm.nih.gov/genomes/all/GCA/003/063/905/GCA_003063905.1_ASM306390v1	SAMN07714505	PRJNA412448	GCA_003063905.1	Scaffold	68.1		PCFQ01	2018-04-23T00:00:00Z		40934037	82	499196	48936	4003385	3452049	2546880	2476360	2011433	1727419	1566691	1416645	835970	650199	1009
01_Alage	61	Picochlorum	ftp://ftp.ncbi.nlm.nih.gov/genomes/all/GCA/000/876/415/GCA_000876415.1_ASM87641v1	SAMN02739349	PRJNA245752	GCA_000876415.1	Scaffold	46.1		JPID01	2014-07-28T00:00:00Z		13390658	880	15216.7	571	564282	382456	305721	221066	167882	126215	101439	78526	54428	25397	200
01_Alage	62	Botryococcus braunii	ftp://ftp.ncbi.nlm.nih.gov/genomes/all/GCA/002/005/505/GCA_002005505.1_B_braunii_Showa_v1	SAMN00120186	PRJNA60039	GCA_002005505.1	Scaffold	50.8		MVGU01	2017-02-22T00:00:00Z	ftp://ftp.ncbi.nlm.nih.gov/genomes/all/GCA/002/005/505/GCA_002005505.1_B_braunii_Showa_v1	184381702	2751	67023.5	4444	1870169	850178	659180	535809	449315	372998	299915	224209	152951	70530	1010
01_Alage	63	Coccomyxa	ftp://ftp.ncbi.nlm.nih.gov/genomes/all/GCA/000/812/005/GCA_000812005.1_ASM81200v1	SAMN03248237	PRJNA269066	GCA_000812005.1	Scaffold	54.7		JUGA01	2014-12-30T00:00:00Z		48546496	106	457986	19501	3762872	3273802	3132237	2894677	2367117	2254067	2017286	1719426	1199035	592023	1004
01_Alage	64	Coccomyxa subellipsoidea C-169	ftp://ftp.ncbi.nlm.nih.gov/genomes/all/GCF/000/258/705/GCF_000258705.1_Coccomyxa_subellipsoidae_v2.0	SAMN02744078	PRJNA32657	GCA_000258705.1	Contig	52.9		AGSI01	2012-04-13T00:00:00Z	ftp://ftp.ncbi.nlm.nih.gov/genomes/all/GCA/000/258/705/GCA_000258705.1_Coccomyxa_subellipsoidae_v2.0	48826616	29	1.68368e+06	1434801	4035500	3860699	3057696	2957951	2666267	1959569	1905899	1590041	1404324	1104687	111973
01_Alage	65	unclassified Trebouxiophyceae	ftp://ftp.ncbi.nlm.nih.gov/genomes/all/GCA/003/568/905/GCA_003568905.1_KSI-1_01	SAMD00134990	PRJDB7314	GCA_003568905.1	Scaffold	64.1		BHFV01	2018-08-29T00:00:00Z	ftp://ftp.ncbi.nlm.nih.gov/genomes/all/GCA/003/568/905/GCA_003568905.1_KSI-1_01	44686223	22485	1987.38	312	161348	72650	50209	37707	28797	21380	15446	9403	3624	454	200
01_Alage	66	Trebouxia	ftp://ftp.ncbi.nlm.nih.gov/genomes/all/GCA/002/118/135/GCA_002118135.1_TrTZW2008_1.0	SAMD00066476	PRJDB5287	GCA_002118135.1	Scaffold	49.7		BDIU01	2017-03-31T21:29:00Z		69346529	677	102432	53668	728494	446798	371014	312675	275934	223445	182890	141554	106521	58319	2014
01_Alage	67	Trebouxia gelatinosa	ftp://ftp.ncbi.nlm.nih.gov/genomes/all/GCA/000/818/905/GCA_000818905.1_ASM81890v1	SAMN03104849	PRJNA263654	GCA_000818905.1	Scaffold	50.4		JUBA01	2015-01-15T00:00:00Z	ftp://ftp.ncbi.nlm.nih.gov/genomes/all/GCA/000/818/905/GCA_000818905.1_ASM81890v1	61726235	848	72790.4	1481	8259430	8259430	8161804	7821234	3878309	3512598	2853963	1807457	1199168	76568	1000
01_Alage	68	Chlorokybus atmophyticus	ftp://ftp.ncbi.nlm.nih.gov/genomes/all/GCA/009/103/225/GCA_009103225.1_ASM910322v1	SAMN10351691	PRJNA498917	GCA_009103225.1	Scaffold	50.3		RHPI01	2019-10-15T00:00:00Z	ftp://ftp.ncbi.nlm.nih.gov/genomes/all/GCA/009/103/225/GCA_009103225.1_ASM910322v1	74330326	3809	19514.4	303	2709767	1957660	1371545	1226704	1014283	752385	612565	435686	299198	133562	201
01_Alage	69	Mesostigma viride	ftp://ftp.ncbi.nlm.nih.gov/genomes/all/GCA/004/000/685/GCA_004000685.1_MeVI296_assembly3	SAMD00151924	PRJDB7683	GCA_004000685.1	Contig	54.2		BIFU01	2018-12-15T00:00:00Z	ftp://ftp.ncbi.nlm.nih.gov/genomes/all/GCA/004/000/685/GCA_004000685.1_MeVI296_assembly3	145898619	52785	2764.02	2256	29223	6966	5407	4498	3821	3263	2774	2332	1906	1468	1000
01_Alage	70	Klebsormidium nitens	ftp://ftp.ncbi.nlm.nih.gov/genomes/all/GCA/000/708/835/GCA_000708835.1_ASM70883v1	SAMD00000399	PRJDB718	GCA_000708835.1	Scaffold	52.3703	chloroplast Pltd:DF238762.1; mitochondrion MT:DF238763.1	BANV01	2014-05-29T00:00:00Z	ftp://ftp.ncbi.nlm.nih.gov/genomes/all/GCA/000/708/835/GCA_000708835.1_ASM70883v1	104209716	1814	57447.5	25079	541865	366435	261290	203036	164667	134930	104058	79125	55443	29916	2022
01_Alage	71	Chara braunii	ftp://ftp.ncbi.nlm.nih.gov/genomes/all/GCA/003/427/395/GCA_003427395.1_Cbr_1.0	SAMD00044344	PRJDB3348	GCA_003427395.1	Scaffold	39.5		BFEA01	2018-07-13T21:44:00Z	ftp://ftp.ncbi.nlm.nih.gov/genomes/all/GCA/003/427/395/GCA_003427395.1_Cbr_1.0	1751211849	11654	150267	2071	14228587	5856951	4298130	3318587	2765265	2261426	1862595	1436380	979703	551793	885
01_Alage	72	Mesotaenium endlicherianum	ftp://ftp.ncbi.nlm.nih.gov/genomes/all/GCA/009/602/735/GCA_009602735.1_ASM960273v1	SAMN11774796	PRJNA543678	GCA_009602735.1	Scaffold	46.9		WELA01	2019-11-06T00:00:00Z	ftp://ftp.ncbi.nlm.nih.gov/genomes/all/GCA/009/602/735/GCA_009602735.1_ASM960273v1	173751473	13861	12535.3	391	1840379	1035718	810597	700834	540197	448375	344304	281638	193002	84696	201
01_Alage	73	Physcomitrella patens	ftp://ftp.ncbi.nlm.nih.gov/genomes/all/GCF/000/002/425/GCF_000002425.4_Phypa_V3	SAMN00120126	PRJNA13064	GCA_000002425.2	Chromosome	33.8892	chromosome 1:NC_037253.1/CM009316.1; chromosome 2:NC_037254.1/CM009317.1; chromosome 3:NC_037255.1/CM009318.1; chromosome 4:NC_037256.1/CM009319.1; chromosome 5:NC_037257.1/CM009320.1; chromosome 6:NC_037258.1/CM009321.1; chromosome 7:NC_037259.1/CM009322.1; chromosome 8:NC_037260.1/CM009323.1; chromosome 9:NC_037261.1/CM009324.1; chromosome 10:NC_037262.1/CM009325.1; chromosome 11:NC_037263.1/CM…	ABEU02	2007-11-27T00:00:00Z	ftp://ftp.ncbi.nlm.nih.gov/genomes/all/GCA/000/002/425/GCA_000002425.2_Phypa_V3	472081022	359	1.31499e+06	6292	30242098	25998084	22344759	19533230	17794193	17435539	17248380	15984037	15510460	15138416	1006
02_Bryophyte	74	Pleurozium schreberi	ftp://ftp.ncbi.nlm.nih.gov/genomes/all/GCA/006/891/605/GCA_006891605.1_SU_Pschr_1.0	SAMN10578977	PRJNA509035	GCA_006891605.1	Contig	38.2		VACF01	2019-07-11T00:00:00Z	ftp://ftp.ncbi.nlm.nih.gov/genomes/all/GCA/006/891/605/GCA_006891605.1_SU_Pschr_1.0	220032134	2689	81826.8	51488	977930	337161	263376	219104	182725	154439	127797	105015	77396	47437	912
02_Bryophyte	75	Marchantia inflexa	ftp://ftp.ncbi.nlm.nih.gov/genomes/all/GCA/006/177/815/GCA_006177815.1_M_inflexa_v1.1	SAMN09430624	PRJNA476339	GCA_006177815.1	Scaffold	32.9		QLSQ01	2019-06-10T00:00:00Z	ftp://ftp.ncbi.nlm.nih.gov/genomes/all/GCA/006/177/815/GCA_006177815.1_M_inflexa_v1.1	208752592	41556	5023.4	1910	2829580	915666	571837	348417	43234	11136	6450	4029	2554	1621	933
02_Bryophyte	76	Marchantia polymorpha	ftp://ftp.ncbi.nlm.nih.gov/genomes/all/GCA/003/032/435/GCA_003032435.1_Marchanta_polymorpha_v1	SAMN00769973	PRJNA53523	GCA_003032435.1	Scaffold	42.5		PNPG01	2018-01-10T00:00:00Z	ftp://ftp.ncbi.nlm.nih.gov/genomes/all/GCA/003/032/435/GCA_003032435.1_Marchanta_polymorpha_v1	225760816	2957	76347.9	3995	6192411	3143310	2356800	1851054	1645393	1366373	1106667	837203	553858	222568	2000
02_Bryophyte	77	Selaginella kraussiana	ftp://ftp.ncbi.nlm.nih.gov/genomes/all/GCA/001/021/135/GCA_001021135.1_ASM102113v1	SAMN03704959	PRJNA284650	GCA_001021135.1	Scaffold	44.7		LDJE01	2015-06-05T00:00:00Z	ftp://ftp.ncbi.nlm.nih.gov/genomes/all/GCA/001/021/135/GCA_001021135.1_ASM102113v1	114502747	105914	1081.09	463	28160	8815	6139	4486	3320	2415	1652	1058	642	375	201
03_Lycophytes	78	Selaginella moellendorffii	ftp://ftp.ncbi.nlm.nih.gov/genomes/all/GCF/000/143/415/GCF_000143415.4_v1.0	SAMN02981255	PRJNA13078	GCA_000143415.2	Scaffold	45.3		ADFJ01	2010-06-24T00:00:00Z	ftp://ftp.ncbi.nlm.nih.gov/genomes/all/GCA/000/143/415/GCA_000143415.2_v1.0	212501708	757	280345	8408	6951972	4340499	3149477	2470656	1973895	1749879	1451693	1049549	765235	407360	399
03_Lycophytes	79	Selaginella tamariscina	ftp://ftp.ncbi.nlm.nih.gov/genomes/all/GCA/003/024/785/GCA_003024785.1_ASM302478v1	SAMN07840812	PRJNA416064	GCA_003024785.1	Scaffold	37.4		PUQB01	2018-03-29T00:00:00Z	ftp://ftp.ncbi.nlm.nih.gov/genomes/all/GCA/003/024/785/GCA_003024785.1_ASM302478v1	300729260	1391	216196	123147	2535430	1091023	877291	631628	505040	407666	308539	228918	164160	95087	20067
03_Lycophytes	80	Adiantum capillus-veneris	unpublish										4484705891		14440.4	1893	2144392	721247	512203	394428	304065	228990	166274	100717	24190	4553	908
04_Fern	81	Azolla filliculoides	ftp://ftp.fernbase.org/Salvinia_cucullata/Salvinia_asm_v1.2										622592327		162176	32096	16594929	8486933	3481627	2342920	1501751	964708	619540	367317	173771	43713	6889
04_Fern	82	Salvinia cucullata	ftp://ftp.fernbase.org/Azolla_filiculoides/Azolla_asm_v1.1										231846944		62307.7	13310	4132625	2447574	1904108	1291271	978787	719830	512133	315433	34765	14454	3118
04_Fern	83	Gnetum montanum	https://www.datadryad.org/resource/doi:10.5061/dryad.0vm37.1										4072237404		28677.7	1554	7340683	1574038	1100878	816391	628157	475170	350715	237695	134658	34252	1000
05_Gymnosperms	84	Sequoiadendron giganteum	ftp://ftp.ncbi.nlm.nih.gov/genomes/all/GCA/007/115/665/GCA_007115665.1_SEGI.1.0	SAMN11640747	PRJNA541481	GCA_007115665.1	Scaffold	51.3639	chloroplast Pltd:CM017437.1	VCHN01	2019-07-18T00:00:00Z	ftp://ftp.ncbi.nlm.nih.gov/genomes/all/GCA/007/115/665/GCA_007115665.1_SEGI.1.0	8122132770	39798	204084	89576	3528777	1371210	1014522	785172	617094	490521	378637	280875	192415	108828	444
05_Gymnosperms	85	Amborella trichopoda	ftp://ftp.ncbi.nlm.nih.gov/genomes/all/GCF/000/471/905/GCF_000471905.2_AMTR1.0	SAMN02313977	PRJNA212863	GCA_000471905.1	Scaffold	38.1	chloroplast Pltd:NC_005086.1/	AWHE01	2013-09-27T00:00:00Z	ftp://ftp.ncbi.nlm.nih.gov/genomes/all/GCA/000/471/905/GCA_000471905.1_AMTR1.0	706495326	5746	122954	3260	15980527	9414115	7564463	6376714	5499001	4927027	3967838	3104487	2272343	1154593	1732
06_ANT	86	Nymphaea colorata	ftp://ftp.ncbi.nlm.nih.gov/genomes/all/GCA/008/831/285/GCA_008831285.1_ASM883128v1	SAMN12766378	PRJNA587754	GCA_008831285.1	Chromosome	38.5888	chromosome 1:CM018369.1; chromosome 2:CM018370.1; chromosome 3:CM018371.1; chromosome 4:CM018372.1; chromosome 5:CM018373.1; chromosome 6:CM018374.1; chromosome 7:CM018375.1; chromosome 8:CM018376.1; chromosome 9:CM018377.1; chromosome 10:CM018378.1; chromosome 11:CM018379.1; chromosome 12:CM018380.1; chromosome 13:CM018381.1; chromosome 14:CM018382.1; mitochondrion:NC_037468.1/	VYXN01	2019-09-24T00:00:00Z	ftp://ftp.ncbi.nlm.nih.gov/genomes/all/GCA/008/831/285/GCA_008831285.1_ASM883128v1	409013923	800	511267	34269	44612865	44612865	30884114	27693492	27336409	25516871	25082955	24868339	23035089	12577093	3011
06_ANT	87	Cinnamomum micranthum	ftp://ftp.ncbi.nlm.nih.gov/genomes/all/GCA/003/546/025/GCA_003546025.1_ASBRC_Ckan_1.0	SAMN09509728	PRJNA477266	GCA_003546025.1	Scaffold	38.2		QPKB01	2018-09-11T00:00:00Z		730416403	2150	339729	14565	87013940	87013940	81065106	77926444	58831143	50350591	48047431	45778809	41984183	37069385	1038
07_Magnoliids	88	Persea americana	ftp://ftp.ncbi.nlm.nih.gov/genomes/all/GCA/002/908/915/GCA_002908915.1_Hass1.0	SAMN07709230	PRJNA412302	GCA_002908915.1	Contig	39		NXHZ01	2018-01-30T00:00:00Z	ftp://ftp.ncbi.nlm.nih.gov/genomes/all/GCA/002/908/915/GCA_002908915.1_Hass1.0	446756492	5000	89351.3	40048	2370353	768092	520169	380854	280279	205885	130931	73981	47140	32564	4657
07_Magnoliids	89	Liriodendron chinense	ftp://ftp.ncbi.nlm.nih.gov/genomes/all/GCA/003/013/855/GCA_003013855.2_NJFU_Lchi_2.0	SAMN08026720	PRJNA418360	GCA_003013855.2	Scaffold	41.5		PVNU02	2018-03-21T00:00:00Z	ftp://ftp.ncbi.nlm.nih.gov/genomes/all/GCA/003/013/855/GCA_003013855.2_NJFU_Lchi_2.0	1742421816	3710	469655	55109	19271491	10234482	7613998	5692699	4480600	3525943	2855213	1988182	1192516	276287	1012
07_Magnoliids	90	Magnolia ashei	ftp://ftp.ncbi.nlm.nih.gov/genomes/all/GCA/003/571/905/GCA_003571905.1_ASM357190v1	SAMN07722838	PRJNA412672	GCA_003571905.1	Scaffold	39.5		PCNC01	2018-09-17T00:00:00Z	ftp://ftp.ncbi.nlm.nih.gov/genomes/all/GCA/003/571/905/GCA_003571905.1_ASM357190v1	284511610	265493	1071.64	885	142484	2444	1884	1564	1337	1156	999	862	746	637	369
07_Magnoliids	91	Spirodela polyrhiza	ftp://ftp.ncbi.nlm.nih.gov/genomes/all/GCA/001/981/405/GCA_001981405.1_ASM198140v1	SAMN04386762	PRJNA308109	GCA_001981405.1	Chromosome	42.7191	chromosome 1:CP019093.1; chromosome 2:CP019094.1; chromosome 3:CP019095.1; chromosome 4:CP019096.1; chromosome 5:CP019097.1; chromosome 6:CP019098.1; chromosome 7:CP019099.1; chromosome 8:CP019100.1; chromosome 9:CP019101.1; chromosome 10:CP019102.1; chromosome 11:CP019103.1; chromosome 12:CP019104.1; chromosome 13:CP019105.1; chromosome 14:CP019106.1; chromosome 15:CP019107.1; chromosome 16:CP01…		2017-01-17T00:00:00Z	ftp://ftp.ncbi.nlm.nih.gov/genomes/all/GCA/001/981/405/GCA_001981405.1_ASM198140v1	136670443	20	6.83352e+06	5901629	14772968	14772968	8976907	8682450	8045491	7641483	6991192	5849386	5602277	4297296	2390803
08_Monocots	92	Zostera marina	ftp://ftp.ncbi.nlm.nih.gov/genomes/all/GCA/001/185/155/GCA_001185155.1_Zosma_marina.v.2.1	SAMN00991190	PRJNA41721	GCA_001185155.1	Scaffold	38.9		LFYR01	2015-07-22T00:00:00Z	ftp://ftp.ncbi.nlm.nih.gov/genomes/all/GCA/001/185/155/GCA_001185155.1_Zosma_marina.v.2.1	203913826	2228	91523.3	5133	2654544	1224850	923398	748521	638435	485578	384041	283614	185727	95502	995
08_Monocots	93	Dioscorea alata	ftp://ftp.ncbi.nlm.nih.gov/genomes/all/GCA/002/904/275/GCA_002904275.2_ASM290427v2	SAMEA3542249	PRJEB10904	GCA_002904275.2	Scaffold	36.1		CZHE02	2015-10-10T00:00:00Z	ftp://ftp.ncbi.nlm.nih.gov/genomes/all/GCA/002/904/275/GCA_002904275.2_ASM290427v2	620909442	57706	10759.9	5526	296491	68934	46424	34427	25678	19343	14314	10215	6795	4134	2001
08_Monocots	94	Dioscorea rotundata	ftp://ftp.ncbi.nlm.nih.gov/genomes/all/GCA/002/240/015/GCA_002240015.2_TDr96_F1_Pseudo_Chromosome_v1.0	SAMD00039982	PRJDB3383	GCA_002240015.2	Chromosome	31.5652	chromosome 1:BDMI01000001.1; chromosome 2:BDMI01000002.1; chromosome 3:BDMI01000003.1; chromosome 4:BDMI01000004.1; chromosome 5:BDMI01000005.1; chromosome 6:BDMI01000006.1; chromosome 7:BDMI01000007.1; chromosome 8:BDMI01000008.1; chromosome 9:BDMI01000009.1; chromosome 10:BDMI01000010.1; chromosome 11:BDMI01000011.1; chromosome 12:BDMI01000012.1; chromosome 13:BDMI01000013.1; chromosome 14:BDMI…	BDMI01	2017-07-28T00:00:00Z	ftp://ftp.ncbi.nlm.nih.gov/genomes/all/GCA/002/240/015/GCA_002240015.2_TDr96_F1_Pseudo_Chromosome_v1.0	456674974	21	2.17464e+07	22795539	33969142	32871075	32866201	29719729	28021425	25272979	23324680	20585887	18053115	15713101	5203141
08_Monocots	95	Trichopus zeylanicus	ftp://ftp.ncbi.nlm.nih.gov/genomes/all/GCA/005/019/695/GCA_005019695.1_DCB_TZT_HYBRID.1.1	SAMN09770388	PRJNA484861	GCA_005019695.1	Scaffold	36.5		RXID01	2019-05-01T00:00:00Z		713406926	22601	31565.3	1037	3679769	1782339	1131071	853751	617023	431834	288191	156611	72969	27536	204
08_Monocots	96	Xerophyta viscosa	ftp://ftp.ncbi.nlm.nih.gov/genomes/all/GCA/002/076/135/GCA_002076135.1_ASM207613v1	SAMN03940242	PRJNA291133	GCA_002076135.1	Scaffold	36.3		MJHO01	2017-03-31T00:00:00Z	ftp://ftp.ncbi.nlm.nih.gov/genomes/all/GCA/002/076/135/GCA_002076135.1_ASM207613v1	295462401	896	329757	51060	14257138	5414181	3646474	2466142	2003651	1670317	1270367	886339	500817	157359	1038
08_Monocots	97	Asparagus officinalis	ftp://ftp.ncbi.nlm.nih.gov/genomes/all/GCF/001/876/935/GCF_001876935.1_Aspof.V1	SAMN04606231	PRJNA376608	GCA_001876935.1	Chromosome	39.3594	chromosome 1:NC_033794.1/CM007381.1; chromosome 2:NC_033795.1/CM007382.1; chromosome 3:NC_033796.1/CM007383.1; chromosome 4:NC_033797.1/CM007384.1; chromosome 5:NC_033798.1/CM007385.1; chromosome 6:NC_033799.1/CM007386.1; chromosome 7:NC_033800.1/CM007387.1; chromosome 8:NC_033801.1/CM007388.1; chromosome 9:NC_033802.1/CM007389.1; chromosome 10:NC_033803.1/CM007390.1	MPDI01	2016-11-09T00:00:00Z	ftp://ftp.ncbi.nlm.nih.gov/genomes/all/GCA/001/876/935/GCA_001876935.1_Aspof.V1	1187538024	11792	100707	834	151357931	151357931	146560859	132393784	131469567	131339754	113259003	84732013	78779235	68543460	215
08_Monocots	98	Apostasia shenzhenica	ftp://ftp.ncbi.nlm.nih.gov/genomes/all/GCA/002/786/265/GCA_002786265.1_ASM278626v1	SAMN04453324	PRJNA310678	GCA_002786265.1	Scaffold	34.9		PEFY01	2017-11-17T00:00:00Z	ftp://ftp.ncbi.nlm.nih.gov/genomes/all/GCA/002/786/265/GCA_002786265.1_ASM278626v1	348733136	2985	116829	1624	12424053	10110636	6237011	5003307	3457059	3029156	2413737	1972814	1402703	765391	751
08_Monocots	99	Gastrodia elata	ftp://ftp.ncbi.nlm.nih.gov/genomes/all/GCA/002/966/915/GCA_002966915.1_ASM296691v1	SAMN07125589	PRJNA386713	GCA_002966915.1	Scaffold	33.4		PVEL01	2018-03-02T00:00:00Z		1060984162	3768	281578	4212	24690109	12708525	8465406	6852597	5737842	4911943	4323729	3270835	2497872	1349508	892
08_Monocots	100	Dendrobium catenatum	ftp://ftp.ncbi.nlm.nih.gov/genomes/all/GCF/001/605/985/GCF_001605985.2_ASM160598v2	SAMN03083363	PRJNA262478	GCA_001605985.2	Scaffold	35.2003	chloroplast Pltd:NC_037361.1/	JSDN02	2016-02-26T00:00:00Z	ftp://ftp.ncbi.nlm.nih.gov/genomes/all/GCA/001/605/985/GCA_001605985.2_ASM160598v2	1104259548	286090	3859.83	302	33291853	11904332	3971942	2249086	1423362	1043725	698083	460085	211294	1638	200
08_Monocots	101	Phalaenopsis aphrodite	ftp://ftp.ncbi.nlm.nih.gov/genomes/all/GCA/003/013/225/GCA_003013225.1_ASM301322v1	SAMN06768338	PRJNA383284	GCA_003013225.1	Scaffold	30.4		NEWO01	2018-03-21T00:00:00Z	ftp://ftp.ncbi.nlm.nih.gov/genomes/all/GCA/003/013/225/GCA_003013225.1_ASM301322v1	1025096742	13732	74650.2	3407	10391936	3839003	2515574	1763854	1311738	946429	669685	436357	235473	69359	886
08_Monocots	102	Phalaenopsis equestris	ftp://ftp.ncbi.nlm.nih.gov/genomes/all/GCF/001/263/595/GCF_001263595.1_ASM126359v1	SAMN02046388	PRJNA382149	GCA_001263595.1	Scaffold	35.5002	chloroplast Pltd:NC_017609.1/	APLD01	2015-08-07T00:00:00Z	ftp://ftp.ncbi.nlm.nih.gov/genomes/all/GCA/001/263/595/GCA_001263595.1_ASM126359v1	1064200343	89584	11879.4	516	81761211	6713649	1846253	1001947	572072	378442	252167	159147	82061	17946	201
08_Monocots	103	Vanilla planifolia	ftp://ftp.ncbi.nlm.nih.gov/genomes/all/GCA/004/338/375/GCA_004338375.1_Vapla0.1.4	SAMN10484643	PRJNA507095	GCA_004338375.1	Scaffold	24.8		SDXO01	2019-03-11T00:00:00Z	ftp://ftp.ncbi.nlm.nih.gov/genomes/all/GCA/004/338/375/GCA_004338375.1_Vapla0.1.4	2203635484	794534	2773.49	362	630906	210645	147215	109030	78894	53337	32273	17051	7976	730	201
08_Monocots	104	Cocos nucifera	ftp://ftp.ncbi.nlm.nih.gov/genomes/all/GCA/003/604/295/GCA_003604295.1_ASM360429v1	SAMN07738886	PRJNA413280	GCA_003604295.1	Scaffold	31.8		PDMH01	2018-10-01T00:00:00Z	ftp://ftp.ncbi.nlm.nih.gov/genomes/all/GCA/003/604/295/GCA_003604295.1_ASM360429v1	1839172334	59328	31000.1	10786	826246	290687	199983	146092	111644	85564	65082	48076	32908	18710	1000
08_Monocots	105	Elaeis guineensis	ftp://ftp.ncbi.nlm.nih.gov/genomes/all/GCF/000/442/705/GCF_000442705.1_EG5	SAMN02981535	PRJNA268357	GCA_000442705.1	Chromosome	40.999	chromosome 1:NC_025993.1/CM002081.1; chromosome 2:NC_025994.1/CM002082.1; chromosome 3:NC_025995.1/CM002083.1; chromosome 4:NC_025996.1/CM002084.1; chromosome 5:NC_025997.1/CM002085.1; chromosome 6:NC_025998.1/CM002086.1; chromosome 7:NC_025999.1/CM002087.1; chromosome 8:NC_026000.1/CM002088.1; chromosome 9:NC_026001.1/CM002089.1; chromosome 10:NC_026002.1/CM002090.1; chromosome 11:NC_026003.1/CM…	ASJS01	2013-07-26T00:00:00Z	ftp://ftp.ncbi.nlm.nih.gov/genomes/all/GCA/000/442/705/GCA_000442705.1_EG5	1535178229	40349	38321	2875	68435666	60060032	44357769	38056896	24314465	1268079	604249	299540	124555	32156	1992
08_Monocots	106	Elaeis oleifera	ftp://ftp.ncbi.nlm.nih.gov/genomes/all/GCA/000/441/515/GCA_000441515.1_EO8	SAMN02981531	PRJNA183707	GCA_000441515.1	Scaffold	40.8		ASIR01	2013-07-25T00:00:00Z	ftp://ftp.ncbi.nlm.nih.gov/genomes/all/GCA/000/441/515/GCA_000441515.1_EO8	1402729295	26756	52442.4	5506	4597586	1653958	1098694	739250	506849	336817	213247	135407	80391	35771	1284
08_Monocots	107	Calamus simplicifolius	ftp://ftp.ncbi.nlm.nih.gov/genomes/all/GCA/900/491/605/GCA_900491605.1_Calamus_simplicifolius	SAMEA104450374	PRJEB24031	GCA_900491605.1	Scaffold	39.6		UESW01	2018-06-22T00:00:00Z	ftp://ftp.ncbi.nlm.nih.gov/genomes/all/GCA/900/491/605/GCA_900491605.1_Calamus_simplicifolius	1960809755	5116	383270	206865	4035697	1900720	1462240	1186224	968070	803014	645886	501783	356073	212786	3071
08_Monocots	108	Ananas comosus	ftp://ftp.ncbi.nlm.nih.gov/genomes/all/GCF/001/540/865/GCF_001540865.1_ASM154086v1	SAMN04316497	PRJNA371634	GCA_001540865.1	Chromosome	38.5371	linkage group 1:NC_033621.1/CM003813.1; linkage group 2:NC_033622.1/CM003814.1; linkage group 3:NC_033623.1/CM003815.1; linkage group 4:NC_033624.1/CM003816.1; linkage group 5:NC_033625.1/CM003817.1; linkage group 6:NC_033626.1/CM003818.1; linkage group 7:NC_033627.1/CM003819.1; linkage group 8:NC_033628.1/CM003820.1; linkage group 9:NC_033629.1/CM003821.1; linkage group 10:NC_033630.1/CM003822.1…	LODP01	2016-01-25T00:00:00Z	ftp://ftp.ncbi.nlm.nih.gov/genomes/all/GCA/001/540/865/GCA_001540865.1_ASM154086v1	382055938	3129	122102	13422	24880688	17334668	15024279	14728688	13112115	11759267	11174208	10792357	7684463	47266	201
08_Monocots	109	Raddia distichophylla	ftp://ftp.ncbi.nlm.nih.gov/genomes/all/GCA/005/191/435/GCA_005191435.1_ASM519143v1	SAMN11175023	PRJNA528150	GCA_005191435.1	Scaffold	43.6		SPJY01	2019-05-06T00:00:00Z	ftp://ftp.ncbi.nlm.nih.gov/genomes/all/GCA/005/191/435/GCA_005191435.1_ASM519143v1	580833421	38257	15182.4	1918	7779908	4659803	3609666	2830859	2442636	1806674	1395753	892185	181307	3689	756
08_Monocots	110	Leersia perrieri	ftp://ftp.ncbi.nlm.nih.gov/genomes/all/GCA/000/325/765/GCA_000325765.3_Lperr_V1.4	SAMN02981441	PRJNA163065	GCA_000325765.3	Chromosome	42.5997	chromosome 1:CM002476.1; chromosome 2:CM002480.1; chromosome 3:CM002481.1; chromosome 4:CM002482.1; chromosome 5:CM002483.1; chromosome 6:CM002484.1; chromosome 7:CM002485.1; chromosome 8:CM002486.1; chromosome 9:CM002487.1; chromosome 10:CM002477.1; chromosome 11:CM002478.1; chromosome 12:CM002479.1	ALNV02	2012-10-17T00:00:00Z	ftp://ftp.ncbi.nlm.nih.gov/genomes/all/GCA/000/325/765/GCA_000325765.3_Lperr_V1.4	266687832	12	22223986	21016138	32922458	32922458	29602667	26406337	23326293	22540073	21016138	20807039	20165712	15557830	15534364
08_Monocots	111	Oryza barthii	ftp://ftp.ncbi.nlm.nih.gov/genomes/all/GCA/000/182/155/GCA_000182155.3_O.barthii_v1.3	SAMN02953732	PRJNA30379	GCA_000182155.3	Chromosome	42.0761	chromosome 1:CM002639.1; chromosome 2:CM002643.2; chromosome 3:CM002644.1; chromosome 4:CM002645.1; chromosome 5:CM002646.2; chromosome 6:CM002647.1; chromosome 7:CM002648.1; chromosome 8:CM002649.1; chromosome 9:CM002650.1; chromosome 10:CM002640.2; chromosome 11:CM002641.2; chromosome 12:CM002642.2	ABRL02	2009-04-21T00:00:00Z	ftp://ftp.ncbi.nlm.nih.gov/genomes/all/GCA/000/182/155/GCA_000182155.3_O.barthii_v1.3	308272304	12	2.56894e+07	24128185	36915442	36915442	33311619	31686972	27574323	25711811	24128185	23014695	22678724	19274048	19219615
08_Monocots	112	Oryza brachyantha	ftp://ftp.ncbi.nlm.nih.gov/genomes/all/GCF/000/231/095/GCF_000231095.1_Oryza_brachyantha.v1.4b	SAMN02981362	PRJNA232125	GCA_000231095.2	Chromosome	41.0964	chromosome 1:NC_023163.1/CM001241.2; chromosome 2:NC_023164.1/CM001242.1; chromosome 3:NC_023165.1/CM001243.2; chromosome 4:NC_023166.1/CM001244.2; chromosome 5:NC_023167.1/CM001245.2; chromosome 6:NC_023168.1/CM001246.2; chromosome 7:NC_023169.1/CM001247.2; chromosome 8:NC_023170.1/CM001248.2; chromosome 9:NC_023171.1/CM001249.2; chromosome 10:NC_023172.1/CM001250.2; chromosome 11:NC_023173.1/CM…	AGAT01	2011-10-19T00:00:00Z	ftp://ftp.ncbi.nlm.nih.gov/genomes/all/GCA/000/231/095/GCA_000231095.2_Oryza_brachyantha.v1.4b	259907595	2491	104339	387	33916305	33916305	29620734	27082872	21794218	21479432	18603524	18224760	15318893	14643570	200
08_Monocots	113	Oryza glaberrima	ftp://ftp.ncbi.nlm.nih.gov/genomes/all/GCA/000/147/395/GCA_000147395.2_Oryza_glaberrima_V1	SAMN02981267	PRJNA13765	GCA_000147395.2	Scaffold	42.8		ADWL01	2010-07-08T00:00:00Z	ftp://ftp.ncbi.nlm.nih.gov/genomes/all/GCA/000/147/395/GCA_000147395.2_Oryza_glaberrima_V1	303294962	25599	11847.9	5959	17457517	94408	55826	39790	30300	23146	17540	12887	8699	5100	203
08_Monocots	114	Oryza glumipatula	ftp://ftp.ncbi.nlm.nih.gov/genomes/all/GCA/000/576/495/GCA_000576495.1_Oryza_glumaepatula_v1.5	SAMN02981440	PRJNA48429	GCA_000576495.1	Chromosome	43.7266	chromosome chr1:CM002512.1; chromosome chr10:CM002513.1; chromosome chr11:CM002514.1; chromosome chr12:CM002515.1; chromosome chr2:CM002516.1; chromosome chr3:CM002517.1; chromosome chr4:CM002518.1; chromosome chr5:CM002519.1; chromosome chr6:CM002520.1; chromosome chr7:CM002521.1; chromosome chr8:CM002522.1; chromosome chr9:CM002523.1	ALNU02	2013-02-06T00:00:00Z	ftp://ftp.ncbi.nlm.nih.gov/genomes/all/GCA/000/576/495/GCA_000576495.1_Oryza_glumaepatula_v1.5	372860283	12	3.10717e+07	28350858	46529941	46529941	38039368	37594838	32884216	31548187	28350858	27185770	27098305	23490084	22967634
08_Monocots	115	Oryza longistaminata	ftp://ftp.ncbi.nlm.nih.gov/genomes/all/GCA/001/514/335/GCA_001514335.2_ASM151433v2	SAMN03996572	PRJNA293398	GCA_001514335.2	Chromosome	43.0773	chromosome 12:CM003671.1; chromosome 1:CM003660.1; chromosome 2:CM003661.1; chromosome 3:CM003662.1; chromosome 4:CM003663.1; chromosome 5:CM003664.1; chromosome 6:CM003665.1; chromosome 7:CM003666.1; chromosome 8:CM003667.1; chromosome 9:CM003668.1; chromosome 10:CM003669.1; chromosome 11:CM003670.1	LQBC01	2016-01-13T00:00:00Z	ftp://ftp.ncbi.nlm.nih.gov/genomes/all/GCA/001/514/335/GCA_001514335.2_ASM151433v2	362063720	11745	37372.4	937	46202548	46202548	43445878	36083738	32292456	30401905	25164199	23026653	21200727	17164355	479
08_Monocots	116	Oryza meridionalis	ftp://ftp.ncbi.nlm.nih.gov/genomes/all/GCA/000/338/895/GCA_000338895.2_Oryza_meridionalis_v1.3	SAMN02981442	PRJNA48433	GCA_000338895.2	Chromosome	44.1725	chromosome 1:CM002524.1; chromosome 2:CM002525.1; chromosome 3:CM002526.1; chromosome 4:CM002527.1; chromosome 5:CM002528.1; chromosome 6:CM002529.1; chromosome 7:CM002530.1; chromosome 8:CM002531.1; chromosome 9:CM002532.1; chromosome 10:CM002533.1; chromosome 11:CM002534.1; chromosome 12:CM002535.1	ALNW02	2012-10-17T00:00:00Z	ftp://ftp.ncbi.nlm.nih.gov/genomes/all/GCA/000/338/895/GCA_000338895.2_Oryza_meridionalis_v1.3	335668232	12	2.79724e+07	26596109	41795227	41795227	38314702	37273066	31808207	30391017	26849004	24454635	21838022	18641908	17741381
08_Monocots	117	Oryza meyeriana var. granulata	ftp://ftp.ncbi.nlm.nih.gov/genomes/all/GCA/003/991/445/GCA_003991445.1_ASM399144v1	SAMN07723085	PRJNA412686	GCA_003991445.1	Contig	46.3		RYFJ01	2019-01-03T00:00:00Z	ftp://ftp.ncbi.nlm.nih.gov/genomes/all/GCA/003/991/445/GCA_003991445.1_ASM399144v1	776957456	4618	168245	113697	1587995	641873	484546	395646	322134	262045	209987	164221	122190	75226	2000
08_Monocots	118	Oryza punctata	ftp://ftp.ncbi.nlm.nih.gov/genomes/all/GCA/000/573/905/GCA_000573905.1_Oryza_punctata_v1.2	SAMN02981556	PRJNA13770	GCA_000573905.1	Chromosome	42.8066	chromosome 1:CM002488.1; chromosome 2:CM002489.1; chromosome 3:CM002490.1; chromosome 4:CM002491.1; chromosome 5:CM002492.1; chromosome 6:CM002493.1; chromosome 7:CM002494.1; chromosome 8:CM002495.1; chromosome 9:CM002496.1; chromosome 10:CM002497.1; chromosome 11:CM002498.1; chromosome 12:CM002499.1	AVCL01	2014-02-19T00:00:00Z	ftp://ftp.ncbi.nlm.nih.gov/genomes/all/GCA/000/573/905/GCA_000573905.1_Oryza_punctata_v1.2	393816603	12	3.28181e+07	31082981	46096743	46096743	39559433	38925377	34615992	31244610	31082981	29853973	27944835	26294017	25992119
08_Monocots	119	Oryza rufipogon	ftp://ftp.ncbi.nlm.nih.gov/genomes/all/GCA/000/817/225/GCA_000817225.1_OR_W1943	SAMEA3158452	PRJEB4137	GCA_000817225.1	Scaffold	42.5		CBQP01	2014-12-30T00:00:00Z	ftp://ftp.ncbi.nlm.nih.gov/genomes/all/GCA/000/817/225/GCA_000817225.1_OR_W1943	339177042	3818	88836.3	233	39866532	39866532	34446443	33962743	30521686	27785585	26652778	26200591	25958679	20731201	109
08_Monocots	120	Oryza sativa	ftp://ftp.ncbi.nlm.nih.gov/genomes/all/GCF/000/005/425/GCF_000005425.2_Build_4.0		PRJNA13141	GCA_000005425.2	Chromosome	42.6517	chromosome 1:AP008207.2; chromosome 2:AP008208.2; chromosome 3:AP008209.2; chromosome 4:AP008210.2; chromosome 5:AP008211.2; chromosome 6:AP008212.2; chromosome 7:AP008213.2; chromosome 8:AP008214.2; chromosome 9:AP008215.2; chromosome 10:AP008216.2; chromosome 11:AP008217.2; chromosome 12:AP008218.2		2005-02-02T00:00:00Z	ftp://ftp.ncbi.nlm.nih.gov/genomes/all/GCF/000/005/425/GCF_000005425.2_Build_4.0	382778125	15	2.55185e+07	30039014	45064769	45064769	37257345	36823111	35863200	30828668	30357780	30039014	28530027	23843360	2135
08_Monocots	121	Oryza sativa f. spontanea	ftp://ftp.ncbi.nlm.nih.gov/genomes/all/GCA/000/576/065/GCA_000576065.1_Oryza_nivara_v1.0	SAMN02981560	PRJNA48107	GCA_000576065.1	Chromosome	42.9397	chromosome chr1:CM002500.1; chromosome chr10:CM002501.1; chromosome chr11:CM002502.1; chromosome chr12:CM002503.1; chromosome chr2:CM002504.1; chromosome chr3:CM002505.1; chromosome chr4:CM002506.1; chromosome chr5:CM002507.1; chromosome chr6:CM002508.1; chromosome chr7:CM002509.1; chromosome chr8:CM002510.1; chromosome chr9:CM002511.1	AWHD01	2014-02-19T00:00:00Z	ftp://ftp.ncbi.nlm.nih.gov/genomes/all/GCA/000/576/065/GCA_000576065.1_Oryza_nivara_v1.0	337950324	12	28162527	26703665	42845077	42845077	36134596	35065507	29411429	28646061	26703665	24717764	24378308	20407407	20076173
08_Monocots	122	Zizania latifolia	ftp://ftp.ncbi.nlm.nih.gov/genomes/all/GCA/000/418/225/GCA_000418225.1_Zizania_latifolia_v01	SAMN02981538	PRJNA187578	GCA_000418225.1	Scaffold	44.4		ASSH01	2013-07-03T00:00:00Z	ftp://ftp.ncbi.nlm.nih.gov/genomes/all/GCA/000/418/225/GCA_000418225.1_Zizania_latifolia_v01	603989347	4522	133567	16376	3017511	1425628	1120585	929978	734663	604864	473638	361631	246902	114130	906
08_Monocots	123	Brachypodium distachyon	ftp://ftp.ncbi.nlm.nih.gov/genomes/all/GCF/000/005/505/GCF_000005505.3_Brachypodium_distachyon_v3.0	SAMN02981254	PRJNA32607	GCA_000005505.4	Chromosome	46.4183	chromosome 1:NC_016131.3/CM000880.3; chromosome 2:NC_016132.3/CM000881.3; chromosome 3:NC_016133.3/CM000882.3; chromosome 4:NC_016134.3/CM000883.3; chromosome 5:NC_016135.3/CM000884.3; chloroplast Pltd:NC_011032.1/	ADDN03	2010-02-10T00:00:00Z	ftp://ftp.ncbi.nlm.nih.gov/genomes/all/GCA/000/005/505/GCA_000005505.4_Brachypodium_distachyon_v3.0	271298618	15	2.46635e+07	135199	75071545	75071545	75071545	59640145	59640145	59130575	59130575	59130575	48594894	28630136	1933
08_Monocots	124	Dactylis glomerata	ftp://ftp.ncbi.nlm.nih.gov/genomes/all/GCA/002/892/645/GCA_002892645.1_ASM289264v1	SAMN06310890	PRJNA371686	GCA_002892645.1	Scaffold	45.4		MVYT01	2018-01-19T00:00:00Z	ftp://ftp.ncbi.nlm.nih.gov/genomes/all/GCA/002/892/645/GCA_002892645.1_ASM289264v1	839914838	1072009	783.5	341	46075	11013	6864	4431	2770	1656	967	582	387	276	200
08_Monocots	125	Lolium perenne	ftp://ftp.ncbi.nlm.nih.gov/genomes/all/GCA/001/735/685/GCA_001735685.1_ASM173568v1	SAMN05714679	PRJNA340873	GCA_001735685.1	Scaffold	46.3		MEHO01	2016-09-20T00:00:00Z	ftp://ftp.ncbi.nlm.nih.gov/genomes/all/GCA/001/735/685/GCA_001735685.1_ASM173568v1	481479386	666180	722.75	472	20690	3394	2287	1685	1281	967	735	572	446	330	200
08_Monocots	126	Hordeum pubiflorum	ftp://ftp.ncbi.nlm.nih.gov/genomes/all/GCA/000/582/825/GCA_000582825.1_Hordeum_pubiflorum_assembly1	SAMEA3138951	PRJEB3404	GCA_000582825.1	Scaffold	47.5		CBMN01	2013-08-21T00:00:00Z	ftp://ftp.ncbi.nlm.nih.gov/genomes/all/GCA/000/582/825/GCA_000582825.1_Hordeum_pubiflorum_assembly1	1425274558	1818420	783.8	336	73183	8674	5604	3787	2528	1662	1059	658	411	263	200
08_Monocots	127	Hordeum vulgare	ftp://ftp.ncbi.nlm.nih.gov/genomes/all/GCA/004/114/815/GCA_004114815.1_Hulless_Barley_ass.V2	SAMN09914874	PRJNA487965	GCA_004114815.1	Scaffold	44.3		SDOW01	2019-01-28T00:00:00Z	ftp://ftp.ncbi.nlm.nih.gov/genomes/all/GCA/004/114/815/GCA_004114815.1_Hulless_Barley_ass.V2	4006124924	1856	2.15847e+06	1367341	16380455	9790115	7237407	5906010	4874001	4006227	3247400	2472188	1866559	1144776	21328
08_Monocots	128	Aegilops tauschii	ftp://ftp.ncbi.nlm.nih.gov/genomes/all/GCF/001/957/025/GCF_001957025.1_Aet_MR_1.0	SAMN05426520	PRJNA371621	GCA_001957025.1	Contig	46.3679	chloroplast Pltd:NC_022133.1/	MCGU01	2017-01-19T00:00:00Z	ftp://ftp.ncbi.nlm.nih.gov/genomes/all/GCF/001/957/025/GCF_001957025.1_Aet_MR_1.0	4327321625	68538	63137.6	9775	5534610	1838946	1253271	891247	653800	468757	324360	199324	97391	28944	252
08_Monocots	129	Triticum aestivum	ftp://ftp.ncbi.nlm.nih.gov/genomes/all/GCA/900/519/105/GCA_900519105.1_iwgsc_refseqv1.0	SAMEA4791365	PRJEB27788	GCA_900519105.1	Chromosome	46.0544	chromosome 1A:LS992080.1; chromosome 1B:LS992081.1; chromosome 1D:LS992082.1; chromosome 2A:LS992083.1; chromosome 2B:LS992084.1; chromosome 2D:LS992085.1; chromosome 3A:LS992086.1; chromosome 3B:LS992087.1; chromosome 3D:LS992088.1; chromosome 4A:LS992089.1; chromosome 4B:LS992090.1; chromosome 4D:LS992091.1; chromosome 5A:LS992092.1; chromosome 5B:LS992093.1; chromosome 5D:LS992094.1; chromosom…		2018-08-19T00:00:00Z	ftp://ftp.ncbi.nlm.nih.gov/genomes/all/GCA/900/519/105/GCA_900519105.1_iwgsc_refseqv1.0	14547261565	22	6.61239e+08	673617499	830829764	801256715	750843639	744588157	720988478	709773743	673617499	638686055	594102056	509857067	473592718
08_Monocots	130	Triticum dicoccoides	ftp://ftp.ncbi.nlm.nih.gov/genomes/all/GCA/900/184/675/GCA_900184675.1_WEW_v1	SAMEA103910696	PRJEB19929	GCA_900184675.1	Chromosome	45.9596	chromosome 1:LT859944.1; chromosome 2:LT859945.1; chromosome 3:LT859946.1; chromosome 4:LT859947.1; chromosome 5:LT859948.1; chromosome 6:LT859949.1; chromosome 7:LT859950.1; chromosome 8:LT859951.1; chromosome 9:LT859952.1; chromosome 10:LT859953.1; chromosome 11:LT859954.1; chromosome 12:LT859955.1; chromosome 13:LT859956.1; chromosome 14:LT859957.1	FXXJ01	2017-06-09T00:00:00Z	ftp://ftp.ncbi.nlm.nih.gov/genomes/all/GCA/900/184/675/GCA_900184675.1_WEW_v1	10494955245	149145	70367.5	1213	841096276	803365466	775183943	755408349	727576108	726427787	703217322	700855599	673896466	621432051	384
08_Monocots	131	Triticum urartu	ftp://ftp.ncbi.nlm.nih.gov/genomes/all/GCA/003/073/215/GCA_003073215.1_Tu2.0	SAMN05513572	PRJNA337888	GCA_003073215.1	Chromosome	45.9397	chromosome 1:CM009793.1; chromosome 2:CM009794.1; chromosome 3:CM009795.1; chromosome 4:CM009796.1; chromosome 5:CM009797.1; chromosome 6:CM009798.1; chromosome 7:CM009799.1	MKGO01	2018-04-26T00:00:00Z	ftp://ftp.ncbi.nlm.nih.gov/genomes/all/GCA/003/073/215/GCA_003073215.1_Tu2.0	4851895022	10284	471791	12083	753719114	753719114	747046674	747046674	719689837	661480603	619584425	619584425	584211917	575865107	1728
08_Monocots	132	Eleusine coracana	ftp://ftp.ncbi.nlm.nih.gov/genomes/all/GCA/002/180/455/GCA_002180455.1_ASM218045v1	SAMN04849255	PRJNA318349	GCA_002180455.1	Scaffold	44.8		LXGH01	2017-06-08T00:00:00Z		1195986209	525627	2275.35	433	454778	105253	67838	48331	34640	23733	14995	7185	1903	667	200
08_Monocots	133	Eleusine indica	ftp://ftp.ncbi.nlm.nih.gov/genomes/all/GCA/003/369/855/GCA_003369855.1_ASM336985v1	SAMN09001275	PRJNA454287	GCA_003369855.1	Scaffold	40.8		QEPD01	2018-08-10T00:00:00Z	ftp://ftp.ncbi.nlm.nih.gov/genomes/all/GCA/003/369/855/GCA_003369855.1_ASM336985v1	492270386	24072	20449.9	464	2439579	691514	522943	393736	303637	233459	171681	122256	74940	31097	200
08_Monocots	134	Oropetium thomaeum	ftp://ftp.ncbi.nlm.nih.gov/genomes/all/GCA/001/182/835/GCA_001182835.1_Oropetium_genomic_20141112	SAMN03765142	PRJNA286116	GCA_001182835.1	Contig	45.3		LFJQ01	2015-07-20T00:00:00Z	ftp://ftp.ncbi.nlm.nih.gov/genomes/all/GCA/001/182/835/GCA_001182835.1_Oropetium_genomic_20141112	243174629	625	389079	35016	7984747	5694366	4208264	3529114	2780208	2386382	1919016	1649376	1148701	397797	16767
08_Monocots	135	Eragrostis curvula	ftp://ftp.ncbi.nlm.nih.gov/genomes/all/GCA/007/726/485/GCA_007726485.1_CERZOS_E.curvula1.0	SAMN10526598	PRJNA508722	GCA_007726485.1	Chromosome	45.6393	chromosome 1:CM017439.1; chromosome 2:CM017440.1; chromosome 3:CM017441.1; chromosome 4:CM017442.1; chromosome 5:CM017443.1; chromosome 6:CM017444.1; chromosome 7:CM017445.1	RWGY01	2019-07-31T00:00:00Z	ftp://ftp.ncbi.nlm.nih.gov/genomes/all/GCA/007/726/485/GCA_007726485.1_CERZOS_E.curvula1.0	603072269	1143	527622	57122	59696155	57091500	57060119	55809479	45712337	43444889	29802391	26185977	21583994	185020	6572
08_Monocots	136	Eragrostis tef	ftp://ftp.ncbi.nlm.nih.gov/genomes/all/GCA/000/970/635/GCA_000970635.1_ASM97063v1	SAMN02872936	PRJNA253673	GCA_000970635.1	Scaffold	45.5		LAPY01	2015-04-08T00:00:00Z	ftp://ftp.ncbi.nlm.nih.gov/genomes/all/GCA/000/970/635/GCA_000970635.1_ASM97063v1	607317615	13883	43745.4	14528	659152	295709	219184	176614	144125	116204	93856	72618	51233	30228	266
08_Monocots	137	Sporobolus alterniflorus	ftp://ftp.ncbi.nlm.nih.gov/genomes/all/GCA/008/808/055/GCA_008808055.1_ASM880805v1	SAMN09601648	PRJNA479677	GCA_008808055.1	Contig	45.3		VSTD01	2019-10-03T00:00:00Z	ftp://ftp.ncbi.nlm.nih.gov/genomes/all/GCA/008/808/055/GCA_008808055.1_ASM880805v1	365572975	52184	7005.46	5609	69818	18523	14094	11508	9636	8112	6816	5757	4894	4127	200
08_Monocots	138	Zoysia japonica	ftp://ftp.ncbi.nlm.nih.gov/genomes/all/GCA/001/602/275/GCA_001602275.1_ASM160227v1	SAMD00041943	PRJDB4210	GCA_001602275.1	Scaffold	42.6		BCLF01	2016-03-15T00:00:00Z	ftp://ftp.ncbi.nlm.nih.gov/genomes/all/GCA/001/602/275/GCA_001602275.1_ASM160227v1	334384427	11786	28371.3	1109	8501895	5768508	4890841	3678990	2785428	2370062	1791584	1366090	899638	295444	500
08_Monocots	139	Zoysia matrella	ftp://ftp.ncbi.nlm.nih.gov/genomes/all/GCA/001/602/295/GCA_001602295.1_ASM160229v1	SAMD00041944	PRJDB4210	GCA_001602295.1	Scaffold	43.3		BCLG01	2016-03-15T00:00:00Z	ftp://ftp.ncbi.nlm.nih.gov/genomes/all/GCA/001/602/295/GCA_001602295.1_ASM160229v1	563438595	13609	41401.9	15959	1041506	299849	216921	169868	136679	108897	84943	64160	44561	25435	500
08_Monocots	140	Zoysia pacifica	ftp://ftp.ncbi.nlm.nih.gov/genomes/all/GCA/001/602/315/GCA_001602315.1_ASM160231v1	SAMD00041945	PRJDB4210	GCA_001602315.1	Scaffold	43.2		BCLH01	2016-03-15T00:00:00Z	ftp://ftp.ncbi.nlm.nih.gov/genomes/all/GCA/001/602/315/GCA_001602315.1_ASM160231v1	397009957	11428	34740.1	7293	1506652	368215	236586	179397	139496	111449	87952	66784	46201	25493	500
08_Monocots	141	Coix aquatica	ftp://ftp.ncbi.nlm.nih.gov/genomes/all/GCA/009/725/075/GCA_009725075.1_ASM972507v1	SAMN10617848	PRJNA509097	GCA_009725075.1	Chromosome	46.7564	chromosome 1:CM019138.1; chromosome 2:CM019139.1; chromosome 3:CM019140.1; chromosome 4:CM019141.1; chromosome 5:CM019142.1; chromosome 6:CM019143.1; chromosome 7:CM019144.1; chromosome 8:CM019145.1; chromosome 9:CM019146.1; chromosome 10:CM019147.1	RZMS01	2019-12-02T00:00:00Z	ftp://ftp.ncbi.nlm.nih.gov/genomes/all/GCA/009/725/075/GCA_009725075.1_ASM972507v1	1615469127	2012	802917	48188	174202866	174202866	168918890	160425556	152123768	148397812	148307143	138711698	129155728	128899141	2364
08_Monocots	142	Miscanthus sacchariflorus	ftp://ftp.ncbi.nlm.nih.gov/genomes/all/GCA/002/993/905/GCA_002993905.1_Msac_v3	SAMN08580354	PRJNA435476	GCA_002993905.1	Chromosome	46.4829	chromosome 1:CM009591.1; chromosome 2:CM009592.1; chromosome 3:CM009593.1; chromosome 4:CM009594.1; chromosome 5:CM009595.1; chromosome 6:CM009596.1; chromosome 7:CM009597.1; chromosome 8:CM009598.1; chromosome 9:CM009599.1; chromosome 10:CM009600.1; chromosome 11:CM009601.1; chromosome 12:CM009602.1; chromosome 13:CM009603.1; chromosome 14:CM009604.1; chromosome 15:CM009605.1; chromosome 16:CM00…	PUID01	2018-03-09T00:00:00Z	ftp://ftp.ncbi.nlm.nih.gov/genomes/all/GCA/002/993/905/GCA_002993905.1_Msac_v3	2074921001	137916	19700.9	8808	56735748	42896058	35839841	30565533	67467	37709	24718	16614	10595	8407	2000
08_Monocots	143	Saccharum hybrid cultivar	ftp://ftp.ncbi.nlm.nih.gov/genomes/all/GCA/900/465/005/GCA_900465005.1_MTP	SAMEA4681430	PRJEB26915	GCA_900465005.1	Scaffold	45.1		UBIK01	2018-06-18T00:00:00Z	ftp://ftp.ncbi.nlm.nih.gov/genomes/all/GCA/900/465/005/GCA_900465005.1_MTP	530659635	5708	92967.7	105315	361451	145380	134538	127658	121578	116672	110510	104173	96355	81984	185
08_Monocots	144	Saccharum spontaneum	ftp://ftp.ncbi.nlm.nih.gov/genomes/all/GCA/003/544/955/GCA_003544955.1_Sspon.HiC_chr_asm	SAMN09753102	PRJNA483885	GCA_003544955.1	Chromosome	44.937	chromosome 1A:CM010683.1; chromosome 1B:CM010684.1; chromosome 1C:CM010685.1; chromosome 1D:CM010686.1; chromosome 2A:CM010687.1; chromosome 2B:CM010688.1; chromosome 2C:CM010689.1; chromosome 2D:CM010690.1; chromosome 3A:CM010691.1; chromosome 3B:CM010692.1; chromosome 3C:CM010693.1; chromosome 3D:CM010694.1; chromosome 4A:CM010695.1; chromosome 4B:CM010696.1; chromosome 4C:CM010697.1; chromosom…	QVOL01	2018-09-10T00:00:00Z	ftp://ftp.ncbi.nlm.nih.gov/genomes/all/GCA/003/544/955/GCA_003544955.1_Sspon.HiC_chr_asm	3133290353	15303	204750	13205	126636275	121903222	114058935	100835780	92524012	91359291	84926298	81286239	77079522	61676436	616
08_Monocots	145	Sorghum bicolor	ftp://ftp.ncbi.nlm.nih.gov/genomes/all/GCF/000/003/195/GCF_000003195.3_Sorghum_bicolor_NCBIv3	SAMN02953738	PRJNA13876	GCA_000003195.3	Chromosome	44.1611	chromosome 1:NC_012870.2/CM000760.3; chromosome 2:NC_012871.2/CM000761.3; chromosome 3:NC_012872.2/CM000762.3; chromosome 4:NC_012873.2/CM000763.3; chromosome 5:NC_012874.2/CM000764.3; chromosome 6:NC_012875.2/CM000765.3; chromosome 7:NC_012876.2/CM000766.3; chromosome 8:NC_012877.2/CM000767.3; chromosome 9:NC_012878.2/CM000768.3; chromosome 10:NC_012879.2/CM000769.3; mitochondrion MT:NC_008360.1…	ABXC03	2009-05-22T00:00:00Z	ftp://ftp.ncbi.nlm.nih.gov/genomes/all/GCA/000/003/195/GCA_000003195.3_Sorghum_bicolor_NCBIv3	709344700	869	816277	4164	80884392	80884392	77742459	74386277	71854669	68658214	65505356	62686529	61233695	59416394	1005
08_Monocots	146	Zea mays	ftp://ftp.ncbi.nlm.nih.gov/genomes/all/GCF/000/005/005/GCF_000005005.2_B73_RefGen_v4	SAMN04296295	PRJNA10769	GCA_000005005.6	Chromosome	46.9109	chromosome 1:NC_024459.2/CM007647.1; chromosome 2:NC_024460.2/CM007648.1; chromosome 3:NC_024461.2/CM007649.1; chromosome 4:NC_024462.2/CM000780.4; chromosome 5:NC_024463.2/CM000781.4; chromosome 6:NC_024464.2/CM000782.4; chromosome 7:NC_024465.2/CM007650.1; chromosome 8:NC_024466.2/CM000784.4; chromosome 9:NC_024467.2/CM000785.4; chromosome 10:NC_024468.2/CM000786.4; mitochondrion MT:NC_007982.1…	LPUQ01	2010-01-29T00:00:00Z	ftp://ftp.ncbi.nlm.nih.gov/genomes/all/GCA/000/005/005/GCA_000005005.6_B73_RefGen_v4	2135083061	598	7.99657e+06	66656	307041717	307041717	246994605	244442276	235667834	223902240	182381542	181122637	174033170	159769782	5568
08_Monocots	147	Alloteropsis semialata	ftp://ftp.ncbi.nlm.nih.gov/genomes/all/GCA/004/135/705/GCA_004135705.1_ASEM_AUS1_V1.0	SAMN09668083	PRJNA481434	GCA_004135705.1	Chromosome	46.2887	chromosome 1:CM014270.1; chromosome 2:CM014271.1; chromosome 3:CM014272.1; chromosome 4:CM014273.1; chromosome 5:CM014274.1; chromosome 6:CM014275.1; chromosome 7:CM014276.1; chromosome 8:CM014277.1; chromosome 9:CM014278.1; chloroplast Pltd:CM014279.1	QPGU01	2019-02-04T00:00:00Z	ftp://ftp.ncbi.nlm.nih.gov/genomes/all/GCA/004/135/705/GCA_004135705.1_ASEM_AUS1_V1.0	747771851	688	1.08688e+06	18611	99975282	99975282	89507255	88284136	88015365	82054887	76905901	76905901	67581463	66636199	313
08_Monocots	148	Echinochloa crus-galli	ftp://ftp.ncbi.nlm.nih.gov/genomes/all/GCA/900/205/405/GCA_900205405.1_ASM90020540v1	SAMEA104207156	PRJEB22102	GCA_900205405.1	Scaffold	38.9		OAMR01	2017-10-23T00:00:00Z	ftp://ftp.ncbi.nlm.nih.gov/genomes/all/GCA/900/205/405/GCA_900205405.1_ASM90020540v1	1486609408	4534	327880	10705	11699334	4406531	3363776	2806271	2317611	1802240	1421415	1138420	818643	453885	1000
08_Monocots	149	Cenchrus americanus	ftp://ftp.ncbi.nlm.nih.gov/genomes/all/GCA/002/174/835/GCA_002174835.2_ASM217483v2	SAMN04124419	PRJNA294988	GCA_002174835.2	Chromosome	48.0881	chromosome 1:CM007982.2; chromosome 2:CM007983.2; chromosome 3:CM007984.2; chromosome 4:CM007985.2; chromosome 5:CM007986.2; chromosome 6:CM007987.2; chromosome 7:CM007988.2	LKME02	2017-06-06T00:00:00Z	ftp://ftp.ncbi.nlm.nih.gov/genomes/all/GCA/002/174/835/GCA_002174835.2_ASM217483v2	1816949023	52033	34919.2	869	300907625	300907625	275469374	275469374	243054348	240570548	191830058	158694342	154011256	1011053	500
08_Monocots	150	Setaria italica	ftp://ftp.ncbi.nlm.nih.gov/genomes/all/GCF/000/263/155/GCF_000263155.2_Setaria_italica_v2.0	SAMN02981383	PRJNA32913	GCA_000263155.2	Chromosome	46.1715	chromosome I:NC_028450.1/CM003528.1; chromosome II:NC_028451.1/CM003529.1; chromosome III:NC_028452.1/CM003530.1; chromosome IV:NC_028453.1/CM003531.1; chromosome V:NC_028454.1/CM003532.1; chromosome VI:NC_028455.1/CM003533.1; chromosome VII:NC_028456.1/CM003534.1; chromosome VIII:NC_028457.1/CM003535.1; chromosome IX:NC_028458.1/CM003536.1; plastid Pltd:NC_022850.1/	AGNK02	2012-05-11T00:00:00Z	ftp://ftp.ncbi.nlm.nih.gov/genomes/all/GCA/000/263/155/GCA_000263155.2_Setaria_italica_v2.0	405868399	337	1.20436e+06	5660	58970307	58970307	50651951	49199997	47252588	47252588	42145699	40689132	40407879	36014550	1005
08_Monocots	151	Setaria viridis	ftp://ftp.ncbi.nlm.nih.gov/genomes/all/GCA/005/286/985/GCA_005286985.1_Setaria_viridis_v2.0	SAMN05660902	PRJNA265547	GCA_005286985.1	Chromosome	46.1894	chromosome 1:CM016552.1; chromosome 2:CM016553.1; chromosome 3:CM016554.1; chromosome 4:CM016555.1; chromosome 5:CM016556.1; chromosome 6:CM016557.1; chromosome 7:CM016558.1; chromosome 8:CM016559.1; chromosome 9:CM016560.1	SNSE01	2019-05-07T00:00:00Z	ftp://ftp.ncbi.nlm.nih.gov/genomes/all/GCA/005/286/985/GCA_005286985.1_Setaria_viridis_v2.0	395731502	75	2.82665e+07	36371416	56381885	56381885	50382502	47849963	46702114	46702114	41732233	40988899	39677845	36371416	21634
08_Monocots	152	Dichanthelium oligosanthes	ftp://ftp.ncbi.nlm.nih.gov/genomes/all/GCA/001/633/215/GCA_001633215.2_ASM163321v2	SAMN04335715	PRJNA305932	GCA_001633215.2	Scaffold	47.5		LWDX02	2016-04-28T00:00:00Z	ftp://ftp.ncbi.nlm.nih.gov/genomes/all/GCA/001/633/215/GCA_001633215.2_ASM163321v2	589166415	17436	33790.2	16804	503854	193418	143850	114798	92521	74581	60405	47020	34151	20591	886
08_Monocots	153	Urochloa ruziziensis	ftp://ftp.ncbi.nlm.nih.gov/genomes/all/GCA/003/016/355/GCA_003016355.1_Bruz	SAMN08660983	PRJNA437375	GCA_003016355.1	Scaffold	40.8		PVZT01	2018-03-21T00:00:00Z	ftp://ftp.ncbi.nlm.nih.gov/genomes/all/GCA/003/016/355/GCA_003016355.1_Bruz	732531281	102577	7141.28	2199	431517	111924	75995	54908	39469	27770	17971	9889	3924	2107	1000
08_Monocots	154	Panicum miliaceum	ftp://ftp.ncbi.nlm.nih.gov/genomes/all/GCA/002/895/445/GCA_002895445.2_ASM289544v2	SAMN08335224	PRJNA429322	GCA_002895445.2	Chromosome	46.8382	chromosome 1:CM010235.1; chromosome 2:CM010236.1; chromosome 3:CM010237.1; chromosome 4:CM010238.1; chromosome 5:CM010239.1; chromosome 6:CM010240.1; chromosome 7:CM010241.1; chromosome 8:CM010242.1; chromosome 9:CM010243.1; chromosome 10:CM010244.1; chromosome 11:CM010245.1; chromosome 12:CM010246.1; chromosome 13:CM010247.1; chromosome 14:CM010248.1; chromosome 15:CM010249.1; chromosome 16:CM01…	PPDP02	2018-01-23T00:00:00Z	ftp://ftp.ncbi.nlm.nih.gov/genomes/all/GCA/002/895/445/GCA_002895445.2_ASM289544v2	848351880	466	1.8205e+06	19471	69183459	61153219	57970102	54126031	52839179	48259421	44648547	42466157	38490750	33613985	622
08_Monocots	155	Panicum hallii	ftp://ftp.ncbi.nlm.nih.gov/genomes/all/GCF/002/211/085/GCF_002211085.1_PHallii_v3.1	SAMN03003198	PRJNA482138	GCA_002211085.2	Chromosome	46.9052	chromosome 1:NC_038042.1/CM008046.2; chromosome 2:NC_038043.1/CM008047.2; chromosome 3:NC_038044.1/CM008048.2; chromosome 4:NC_038045.1/CM008049.2; chromosome 5:NC_038046.1/CM008050.2; chromosome 6:NC_038047.1/CM008051.2; chromosome 7:NC_038048.1/CM008052.2; chromosome 8:NC_038049.1/CM008053.2; chromosome 9:NC_038050.1/CM008054.2	NCQW02	2017-06-19T00:00:00Z	ftp://ftp.ncbi.nlm.nih.gov/genomes/all/GCA/002/211/085/GCA_002211085.2_PHallii_v3.1	535889049	1027	1.84154e+06	73383	73933493	73933493	64542667	59908720	59521222	57869027	52913018	48048951	45727423	44948983	15299
08_Monocots	156	Eichhornia paniculata	ftp://ftp.ncbi.nlm.nih.gov/genomes/all/GCA/001/647/135/GCA_001647135.1_ASM164713v1	SAMN04450015	PRJNA310303	GCA_001647135.1	Scaffold	33.2		LTAE01	2016-05-02T00:00:00Z	ftp://ftp.ncbi.nlm.nih.gov/genomes/all/GCA/001/647/135/GCA_001647135.1_ASM164713v1	571388321	40286	14183.3	6460	249015	91332	65785	50125	39774	31651	24928	18943	13280	7277	1000
08_Monocots	157	Musa acuminata	ftp://ftp.ncbi.nlm.nih.gov/genomes/all/GCF/000/313/855/GCF_000313855.2_ASM31385v2	SAMEA2272344	PRJEA82777	GCA_000313855.2	Chromosome	40.729	chromosome 1:NC_025202.1/HE813975.1; chromosome 2:NC_025203.1/HE813976.1; chromosome 3:NC_025204.1/HE813977.1; chromosome 4:NC_025205.1/HE813978.1; chromosome 5:NC_025206.1/HE813979.1; chromosome 6:NC_025207.1/HE813980.1; chromosome 7:NC_025208.1/HE813981.1; chromosome 8:NC_025209.1/HE813982.1; chromosome 9:NC_025210.1/HE813983.1; chromosome 10:NC_025211.1/HE813984.1; chromosome 11:NC_025212.1/HE…	CAIC01	2012-08-09T00:00:00Z	ftp://ftp.ncbi.nlm.nih.gov/genomes/all/GCF/000/313/855/GCF_000313855.2_ASM31385v2	472231289	7512	65054.6	3099	35439739	34899179	34148863	30470407	30051516	28617404	27573629	22054697	366139	55702	2000
08_Monocots	158	Musa balbisiana	ftp://ftp.ncbi.nlm.nih.gov/genomes/all/GCA/004/837/865/GCA_004837865.1_BananaB_V1	SAMN08469760	PRJNA432894	GCA_004837865.1	Chromosome	37.9868	chromosome 1:CM017188.1; chromosome 2:CM017189.1; chromosome 3:CM017190.1; chromosome 4:CM017191.1; chromosome 5:CM017192.1; chromosome 6:CM017193.1; chromosome 7:CM017194.1; chromosome 8:CM017195.1; chromosome 9:CM017196.1; chromosome 10:CM017197.1; chromosome 11:CM017198.1	PYDT01	2019-04-24T00:00:00Z	ftp://ftp.ncbi.nlm.nih.gov/genomes/all/GCA/004/837/865/GCA_004837865.1_BananaB_V1	492775286	2590	190261	11988	48736620	45393063	42719860	42574599	42323522	41415055	37783162	32560085	30518813	165043	3988
08_Monocots	159	Musa itinerans	ftp://ftp.ncbi.nlm.nih.gov/genomes/all/GCA/001/649/415/GCA_001649415.1_ASM164941v1	SAMN04505257	PRJNA312694	GCA_001649415.1	Scaffold	35.4		LVTN01	2016-05-21T00:00:00Z	ftp://ftp.ncbi.nlm.nih.gov/genomes/all/GCA/001/649/415/GCA_001649415.1_ASM164941v1	455349267	28415	16025	564	1648447	750600	526201	376331	280120	195772	133894	88389	51338	22437	201
08_Monocots	160	Musa schizocarpa	ftp://ftp.ncbi.nlm.nih.gov/genomes/all/GCA/900/464/855/GCA_900464855.1_ASM90046485v1	SAMEA4655287	PRJEB26661	GCA_900464855.1	Scaffold	39		UBIG01	2018-06-18T00:00:00Z	ftp://ftp.ncbi.nlm.nih.gov/genomes/all/GCA/900/464/855/GCA_900464855.1_ASM90046485v1	525283493	194	2.70765e+06	81524	54858060	54858060	52742985	52006332	46993692	44786816	43308909	42979761	37237645	36015517	3592
08_Monocots	161	Berberis thunbergii	ftp://ftp.ncbi.nlm.nih.gov/genomes/all/GCA/003/290/165/GCA_003290165.1_B.thun_GenomeAssembly_v1	SAMN09515102	PRJNA478403	GCA_003290165.1	Contig	0		QNQO01	2018-07-06T00:00:00Z	ftp://ftp.ncbi.nlm.nih.gov/genomes/all/GCA/003/290/165/GCA_003290165.1_B.thun_GenomeAssembly_v1	2240736797	11815	189652	87501	8597998	1726090	1088078	735996	537032	397058	291308	211082	140040	77952	561
09_Base_eudicots	162	Eschscholzia californica	ftp://ftp.ncbi.nlm.nih.gov/genomes/all/GCA/002/897/215/GCA_002897215.1_ECA_r1.0	SAMD00093367	PRJDB6318	GCA_002897215.1	Scaffold	33.1		BEHA01	2017-12-28T00:00:00Z		489064912	53253	9183.8	701	4249866	2101550	1669920	1252071	955231	752971	577080	392135	211451	9303	300
09_Base_eudicots	163	Macleaya cordata	ftp://ftp.ncbi.nlm.nih.gov/genomes/all/GCA/002/174/775/GCA_002174775.1_MC_HNAU_1.0	SAMN06209354	PRJNA359127	GCA_002174775.1	Scaffold	32.9		MVGT01	2017-06-07T00:00:00Z	ftp://ftp.ncbi.nlm.nih.gov/genomes/all/GCA/002/174/775/GCA_002174775.1_MC_HNAU_1.0	377833576	4547	83095.1	14407	5578669	1318982	850032	565586	428775	308204	228484	161693	102875	51854	932
09_Base_eudicots	164	Papaver somniferum	ftp://ftp.ncbi.nlm.nih.gov/genomes/all/GCF/003/573/695/GCF_003573695.1_ASM357369v1	SAMN08604995	PRJNA492326	GCA_003573695.1	Chromosome	37.3014	chromosome 1:NC_039358.1/CM010715.1; chromosome 2:NC_039359.1/CM010716.1; chromosome 3:NC_039360.1/CM010717.1; chromosome 4:NC_039361.1/CM010718.1; chromosome 5:NC_039362.1/CM010719.1; chromosome 6:NC_039363.1/CM010720.1; chromosome 7:NC_039364.1/CM010721.1; chromosome 8:NC_039365.1/CM010722.1; chromosome 9:NC_039366.1/CM010723.1; chromosome 10:NC_039367.1/CM010724.1; chromosome 11:NC_039368.1/CM…	PUWZ01	2018-09-10T00:00:00Z	ftp://ftp.ncbi.nlm.nih.gov/genomes/all/GCA/003/573/695/GCA_003573695.1_ASM357369v1	2715530335	34381	78983.5	961	270405062	248500730	229600373	219560757	216867838	204470928	176451499	166527240	140193751	9903009	252
09_Base_eudicots	165	Aquilegia coerulea	ftp://ftp.ncbi.nlm.nih.gov/genomes/all/GCA/002/738/505/GCA_002738505.1_Aquilegia_coerulea_v1	SAMN01041930	PRJNA33681	GCA_002738505.1	Scaffold	37.3		NXFA01	2017-10-31T00:00:00Z	ftp://ftp.ncbi.nlm.nih.gov/genomes/all/GCA/002/738/505/GCA_002738505.1_Aquilegia_coerulea_v1	301979693	970	311319	6228	11966891	10398616	7384407	6694710	4935514	4232396	3037082	2154379	1557220	853656	1026
09_Base_eudicots	166	Nelumbo nucifera	ftp://ftp.ncbi.nlm.nih.gov/genomes/all/GCF/000/365/185/GCF_000365185.1_Chinese_Lotus_1.1	SAMN02054413	PRJNA168000	GCA_000365185.2	Scaffold	39.4997	chloroplast Chloroplast:NC_025339.1/KF009944.1	AQOG01	2013-04-15T00:00:00Z	ftp://ftp.ncbi.nlm.nih.gov/genomes/all/GCA/000/365/185/GCA_000365185.2_Chinese_Lotus_1.1	804647751	3603	223327	7564	14325340	10603630	8422856	6178458	4560414	3435397	2525387	1805845	1162960	514147	960
09_Base_eudicots	167	Macadamia integrifolia	ftp://ftp.ncbi.nlm.nih.gov/genomes/all/GCA/900/631/585/GCA_900631585.1_Macadamia_Integrifolia_v2	SAMEA5145324	PRJEB13765	GCA_900631585.1	Scaffold	38.5		UZVR01	2018-12-07T00:00:00Z	ftp://ftp.ncbi.nlm.nih.gov/genomes/all/GCA/900/631/585/GCA_900631585.1_Macadamia_Integrifolia_v2	744636076	4098	181707	91836	2191813	989078	760608	595532	507097	413413	329054	255221	183541	113694	501
09_Base_eudicots	168	Kalanchoe fedtschenkoi	ftp://ftp.ncbi.nlm.nih.gov/genomes/all/GCA/002/312/845/GCA_002312845.1_K_fedtschenkoi_M2_v1	SAMN07509503	PRJNA397334	GCA_002312845.1	Scaffold	34.5		NQLW01	2017-09-19T00:00:00Z	ftp://ftp.ncbi.nlm.nih.gov/genomes/all/GCA/002/312/845/GCA_002312845.1_K_fedtschenkoi_M2_v1	256351415	1324	193619	8110	10491024	7886362	6072332	4154412	3442309	2451343	1780824	1300757	811241	258600	1002
10_Super_rosids	169	Sedum album	ftp://ftp.ncbi.nlm.nih.gov/genomes/all/GCA/006/409/495/GCA_006409495.1_Sedum_album_v3	SAMN09943627	PRJNA488791	GCA_006409495.1	Contig	38		QZGG01	2019-06-24T00:00:00Z	ftp://ftp.ncbi.nlm.nih.gov/genomes/all/GCA/006/409/495/GCA_006409495.1_Sedum_album_v3	302250854	6038	50058.1	27780	878589	310944	210691	156503	120499	93122	71273	53739	36865	23037	266
10_Super_rosids	170	Cissus quadrangularis	ftp://ftp.ncbi.nlm.nih.gov/genomes/all/GCA/002/878/655/GCA_002878655.1_ASM287865v1	SAMN03223842	PRJNA268706	GCA_002878655.1	Scaffold	27.3		LLYR01	2018-01-12T00:00:00Z	ftp://ftp.ncbi.nlm.nih.gov/genomes/all/GCA/002/878/655/GCA_002878655.1_ASM287865v1	281703610	125206	2249.92	738	111181	25625	17680	12954	9622	6999	4805	3026	1694	831	200
10_Super_rosids	171	Vitis aestivalis	ftp://ftp.ncbi.nlm.nih.gov/genomes/all/GCA/001/562/795/GCA_001562795.1_VitisNorton_MSU1.0	SAMN04276630	PRJNA302606	GCA_001562795.1	Contig	33.8		LOML01	2016-02-17T00:00:00Z	ftp://ftp.ncbi.nlm.nih.gov/genomes/all/GCA/001/562/795/GCA_001562795.1_VitisNorton_MSU1.0	432755284	756125	572.33	326	24513	4112	2501	1645	1110	772	554	409	311	245	200
10_Super_rosids	172	Vitis cinerea x Vitis riparia	ftp://ftp.ncbi.nlm.nih.gov/genomes/all/GCA/001/282/645/GCA_001282645.1_BoeWGS1.0	SAMEA2532534	PRJEB5934	GCA_001282645.1	Scaffold	34.2		CCJE01	2015-06-30T00:00:00Z	ftp://ftp.ncbi.nlm.nih.gov/genomes/all/GCA/001/282/645/GCA_001282645.1_BoeWGS1.0	539624286	210444	2564.22	1558	110069	11626	8477	6612	5221	4127	3201	2403	1700	1072	438
10_Super_rosids	173	Vitis riparia	ftp://ftp.ncbi.nlm.nih.gov/genomes/all/GCA/004/353/265/GCA_004353265.1_EGFV_Vit.rip_1.0	SAMN10662253	PRJNA512170	GCA_004353265.1	Chromosome	34.4296	chromosome 1:CM014904.1; chromosome 2:CM014905.1; chromosome 3:CM014906.1; chromosome 4:CM014907.1; chromosome 5:CM014908.1; chromosome 6:CM014909.1; chromosome 7:CM014910.1; chromosome 8:CM014911.1; chromosome 9:CM014912.1; chromosome 10:CM014913.1; chromosome 11:CM014914.1; chromosome 12:CM014915.1; chromosome 13:CM014916.1; chromosome 14:CM014917.1; chromosome 15:CM014918.1; chromosome 16:CM01…	SJAQ01	2019-03-15T00:00:00Z	ftp://ftp.ncbi.nlm.nih.gov/genomes/all/GCA/004/353/265/GCA_004353265.1_EGFV_Vit.rip_1.0	500105807	174	2.87417e+06	143681	39737400	30406434	29500977	25684525	24447104	23918791	23486479	22709578	20875004	19822642	99850
10_Super_rosids	174	Vitis vinifera	ftp://ftp.ncbi.nlm.nih.gov/genomes/all/GCF/000/003/745/GCF_000003745.3_12X	SAMEA2272750	PRJEA18785	GCA_000003745.2	Chromosome	35.0336	chromosome 1:NC_012007.3/FN597015.1; chromosome 2:NC_012008.3/FN597017.1; chromosome 3:NC_012009.3/FN597018.1; chromosome 4:NC_012010.3/FN597020.1; chromosome 5:NC_012011.3/FN597022.1; chromosome 6:NC_012012.3/FN597024.1; chromosome 7:NC_012013.3/FN597025.1; chromosome 8:NC_012014.3/FN597027.1; chromosome 9:NC_012015.3/FN597028.1; chromosome 10:NC_012016.3/FN597030.1; chromosome 11:NC_012017.3/FN…	CAAP03	2007-02-13T00:00:00Z	ftp://ftp.ncbi.nlm.nih.gov/genomes/all/GCA/000/003/745/GCA_000003745.2_12X	486196837	2061	254954	4225	30274277	29360087	24396255	23867706	23006712	22385789	21026613	19818926	18779844	1033657	2001
10_Super_rosids	175	Vitis x labruscana x Vitis vinifera	ftp://ftp.ncbi.nlm.nih.gov/genomes/all/GCA/008/326/845/GCA_008326845.1_VSMuph_r1.0	SAMD00180765	PRJDB8610	GCA_008326845.1	Scaffold	34.1		BKBX01	2019-08-21T21:03:00Z	ftp://ftp.ncbi.nlm.nih.gov/genomes/all/GCA/008/326/845/GCA_008326845.1_VSMuph_r1.0	490143216	8696	56364.2	554	46538066	42302273	25264423	17765210	15566193	13153933	11009013	8220258	5622251	2475333	128
10_Super_rosids	176	Aristotelia chilensis	ftp://ftp.ncbi.nlm.nih.gov/genomes/all/GCA/008/921/755/GCA_008921755.1_MAQUI01	SAMN11874982	PRJNA544858	GCA_008921755.1	Scaffold	35.1		VEXP01	2019-10-08T00:00:00Z	ftp://ftp.ncbi.nlm.nih.gov/genomes/all/GCA/008/921/755/GCA_008921755.1_MAQUI01	96354398	42602	2261.73	1725	17931	6270	4728	3807	3112	2580	2141	1770	1460	1210	1000
11_Fabids	177	Cephalotus follicularis	ftp://ftp.ncbi.nlm.nih.gov/genomes/all/GCA/001/972/305/GCA_001972305.1_Cfol_1.0	SAMD00045316	PRJDB4484	GCA_001972305.1	Scaffold	38.9		BDDD01	2017-01-11T21:19:00Z	ftp://ftp.ncbi.nlm.nih.gov/genomes/all/GCA/001/972/305/GCA_001972305.1_Cfol_1.0	1614517073	16307	99007.6	30357	2219130	774820	578533	449086	356549	287498	226428	171039	117784	68821	944
11_Fabids	178	Populus simonii	ftp://ftp.ncbi.nlm.nih.gov/genomes/all/GCA/007/827/005/GCA_007827005.2_Populus_simonii_2.0	SAMN11934934	PRJNA545814	GCA_007827005.2	Chromosome	33.6576	chromosome 1:CM017464.2; chromosome 2:CM017465.2; chromosome 3:CM017466.2; chromosome 4:CM017467.2; chromosome 5:CM017468.2; chromosome 6:CM017469.2; chromosome 7:CM017470.2; chromosome 8:CM017471.2; chromosome 9:CM017472.2; chromosome 10:CM017473.2; chromosome 11:CM017474.2; chromosome 12:CM017475.2; chromosome 13:CM017476.2; chromosome 14:CM017477.2; chromosome 15:CM017478.2; chromosome 16:CM01…	VJNQ02	2019-07-30T00:00:00Z	ftp://ftp.ncbi.nlm.nih.gov/genomes/all/GCA/007/827/005/GCA_007827005.2_Populus_simonii_2.0	441407051	686	1.19623e+06	85655	52212564	52212564	25305605	23004272	23004089	19598675	17173342	16172202	15138618	14201725	15631
11_Fabids	179	Salix brachista	ftp://ftp.ncbi.nlm.nih.gov/genomes/all/GCA/009/078/335/GCA_009078335.1_ASM907833v1	SAMN09235684	PRJNA472210	GCA_009078335.1	Chromosome	34.1556	chromosome 1:CM018572.1; chromosome 2:CM018573.1; chromosome 3:CM018574.1; chromosome 4:CM018575.1; chromosome 5:CM018576.1; chromosome 6:CM018577.1; chromosome 7:CM018578.1; chromosome 8:CM018579.1; chromosome 9:CM018580.1; chromosome 10:CM018581.1; chromosome 11:CM018582.1; chromosome 12:CM018583.1; chromosome 13:CM018584.1; chromosome 14:CM018585.1; chromosome 15:CM018586.1; chromosome 16:CM01…	VDCV01	2019-10-15T00:00:00Z	ftp://ftp.ncbi.nlm.nih.gov/genomes/all/GCA/009/078/335/GCA_009078335.1_ASM907833v1	339587529	30	1.13196e+07	13581586	39688537	39688537	20884143	19345208	18886152	17922059	17101791	16097183	14579692	13388179	57080
11_Fabids	180	Caryocar brasiliense	ftp://ftp.ncbi.nlm.nih.gov/genomes/all/GCA/004/918/865/GCA_004918865.1_Cbr_v1.0	SAMN11174932	PRJNA528117	GCA_004918865.1	Scaffold	34		STGP01	2019-04-26T00:00:00Z	ftp://ftp.ncbi.nlm.nih.gov/genomes/all/GCA/004/918/865/GCA_004918865.1_Cbr_v1.0	212172521	55248	3840.37	2616	64707	16442	11385	8870	7219	6005	5040	4110	3056	1769	500
11_Fabids	181	Ricinus communis	ftp://ftp.ncbi.nlm.nih.gov/genomes/all/GCF/000/151/685/GCF_000151685.1_JCVI_RCG_1.1	SAMN02953659	PRJNA16585	GCA_000151685.2	Scaffold	34.4006	chloroplast Pltd:NC_016736.1/JF937588.1	AASG02	2006-07-18T00:00:00Z	ftp://ftp.ncbi.nlm.nih.gov/genomes/all/GCA/000/151/685/GCA_000151685.2_JCVI_RCG_1.1	350621860	25763	13609.5	1094	4693355	2056774	1329538	1013163	683670	496528	332943	219347	114973	14094	202
11_Fabids	182	Jatropha curcas	ftp://ftp.ncbi.nlm.nih.gov/genomes/all/GCF/000/696/525/GCF_000696525.1_JatCur_1.0	SAMN02799222	PRJNA63485	GCA_000696525.1	Scaffold	35.8997	chloroplast Pltd:NC_012224.1/	AFEW01	2014-05-23T00:00:00Z	ftp://ftp.ncbi.nlm.nih.gov/genomes/all/GCA/000/696/525/GCA_000696525.1_JatCur_1.0	318527106	6024	52876.3	576	5289327	3626826	2495659	1654266	1024368	746835	485165	303655	181283	81171	200
11_Fabids	183	Manihot esculenta	ftp://ftp.ncbi.nlm.nih.gov/genomes/all/GCF/001/659/605/GCF_001659605.1_Manihot_esculenta_v6	SAMN04116956	PRJNA394209	GCA_001659605.1	Chromosome	38.0059	chromosome LG1:NC_035161.1/CM004387.1; chromosome LG2:NC_035162.1/CM004388.1; chromosome LG3:NC_035163.1/CM004389.1; chromosome LG4:NC_035164.1/CM004390.1; chromosome LG5:NC_035165.1/CM004391.1; chromosome LG6:NC_035166.1/CM004392.1; chromosome LG7:NC_035167.1/CM004393.1; chromosome LG8:NC_035168.1/CM004394.1; chromosome LG9:NC_035169.1/CM004395.1; chromosome LG10:NC_035170.1/CM004396.1; chromoso…	LTYI01	2016-06-07T00:00:00Z	ftp://ftp.ncbi.nlm.nih.gov/genomes/all/GCA/001/659/605/GCA_001659605.1_Manihot_esculenta_v6	582278977	2020	288257	12190	34959721	34000172	31596830	29412403	28735499	28119335	27373735	27069033	26192760	366680	960
11_Fabids	184	Hevea brasiliensis	ftp://ftp.ncbi.nlm.nih.gov/genomes/all/GCF/001/654/055/GCF_001654055.1_ASM165405v1	SAMN04451765	PRJNA394253	GCA_001654055.1	Scaffold	35.7	chloroplast Pltd:NC_015308.1/	LVXX01	2016-06-01T00:00:00Z	ftp://ftp.ncbi.nlm.nih.gov/genomes/all/GCA/001/654/055/GCA_001654055.1_ASM165405v1	1373527118	7453	184292	11448	6409783	3272794	2531700	1997296	1565877	1281786	1021275	766022	514330	218446	800
11_Fabids	185	Linum usitatissimum	ftp://ftp.ncbi.nlm.nih.gov/genomes/all/GCA/000/224/295/GCA_000224295.2_ASM22429v2	SAMN00627887	PRJNA68161	GCA_000224295.2	Chromosome	40.8876	chromosome Lu1:CP027619.1; chromosome Lu10:CP027620.1; chromosome Lu11:CP027621.1; chromosome Lu12:CP027622.1; chromosome Lu13:CP027623.1; chromosome Lu14:CP027624.1; chromosome Lu15:CP027625.1; chromosome Lu2:CP027626.1; chromosome Lu3:CP027627.1; chromosome Lu4:CP027628.1; chromosome Lu5:CP027629.1; chromosome Lu6:CP027630.1; chromosome Lu7:CP027631.1; chromosome Lu8:CP027632.1; chromosome Lu9:…		2018-03-09T00:00:00Z	ftp://ftp.ncbi.nlm.nih.gov/genomes/all/GCA/000/224/295/GCA_000224295.2_ASM22429v2	316167074	15	2.10778e+07	19927942	29425369	26636119	25730386	23785339	22091576	20483506	19887771	19392306	18203127	17699753	15636771
11_Fabids	186	Passiflora edulis	ftp://ftp.ncbi.nlm.nih.gov/genomes/all/GCA/002/156/105/GCA_002156105.1_ASM215610v1	SAMN06298772	PRJNA371406	GCA_002156105.1	Scaffold	38.6		MUZT01	2017-05-22T00:00:00Z	ftp://ftp.ncbi.nlm.nih.gov/genomes/all/GCA/002/156/105/GCA_002156105.1_ASM215610v1	165656733	234012	707.9	336	45662	5263	3556	2559	1844	1311	885	554	364	261	200
11_Fabids	187	Rhizophora apiculata	ftp://ftp.ncbi.nlm.nih.gov/genomes/all/GCA/900/174/605/GCA_900174605.1_Rap_scaffold_v2	SAMEA103941919	PRJEB8423	GCA_900174605.1	Scaffold	35		FWPW01	2017-09-19T00:00:00Z	ftp://ftp.ncbi.nlm.nih.gov/genomes/all/GCA/900/174/605/GCA_900174605.1_Rap_scaffold_v2	232055149	142	1.63419e+06	358937	13354123	11597688	7564516	6935487	5969749	5420131	4492558	3449619	2480416	1010585	5078
11_Fabids	188	Populus alba	ftp://ftp.ncbi.nlm.nih.gov/genomes/all/GCA/005/239/225/GCA_005239225.1_ASM523922v1	SAMN10068022	PRJNA491245	GCA_005239225.1	Contig	33.8		RCHU01	2019-05-08T00:00:00Z	ftp://ftp.ncbi.nlm.nih.gov/genomes/all/GCA/005/239/225/GCA_005239225.1_ASM523922v1	416960588	1287	323979	75013	7086944	3562015	2340999	1807163	1493985	1175985	836958	588520	362991	144820	4992
11_Fabids	189	Populus euphratica	ftp://ftp.ncbi.nlm.nih.gov/genomes/all/GCF/000/495/115/GCF_000495115.1_PopEup_1.0	SAMN02981499	PRJNA268063	GCA_000495115.1	Scaffold	32.8012	chloroplast Pltd:NC_024747.1/	AOFL01	2013-11-01T00:00:00Z	ftp://ftp.ncbi.nlm.nih.gov/genomes/all/GCA/000/495/115/GCA_000495115.1_PopEup_1.0	496032534	9615	51589.4	5427	8759900	3217468	1881986	1117000	740341	482055	287776	164379	82997	31816	84
11_Fabids	190	Populus trichocarpa	ftp://ftp.ncbi.nlm.nih.gov/genomes/all/GCF/000/002/775/GCF_000002775.4_Pop_tri_v3	SAMN02953657	PRJNA10772	GCA_000002775.3	Chromosome	34.1468	chromosome 1:NC_037285.1/CM009290.1; chromosome 2:NC_037286.1/CM009291.1; chromosome 3:NC_037287.1/CM009292.1; chromosome 4:NC_037288.1/CM009293.1; chromosome 5:NC_037289.1/CM009294.1; chromosome 6:NC_037290.1/CM009295.1; chromosome 7:NC_037291.1/CM009296.1; chromosome 8:NC_037292.1/CM009297.1; chromosome 9:NC_037293.1/CM009298.1; chromosome 10:NC_037294.1/CM009299.1; chromosome 11:NC_037295.1/CM…	AARH03	2006-09-14T00:00:00Z	ftp://ftp.ncbi.nlm.nih.gov/genomes/all/GCA/000/002/775/GCA_000002775.3_Pop_tri_v3	434289848	1694	300131	6403	50495391	50495391	25890704	24267051	22580532	19465461	16958300	16080358	15610913	12948742	657
11_Fabids	191	Glycine tomentella	ftp://ftp.ncbi.nlm.nih.gov/genomes/all/GCA/007/407/185/GCA_007407185.1_G_tom_03Nov2016_Ncxrf_filtered	SAMN08683511	PRJNA437717	GCA_007407185.1	Scaffold	33.4		PYAF01	2019-07-24T00:00:00Z	ftp://ftp.ncbi.nlm.nih.gov/genomes/all/GCA/007/407/185/GCA_007407185.1_G_tom_03Nov2016_Ncxrf_filtered	1694090375	6353	266660	92120	8876610	3324597	2247342	1621506	1156978	829201	568670	356303	213103	111408	10002
11_Fabids	192	Carpinus fangiana	ftp://ftp.ncbi.nlm.nih.gov/genomes/all/GCA/006/937/295/GCA_006937295.1_ASM693729v1	SAMN11997873	PRJNA548027	GCA_006937295.1	Chromosome	37.2649	chromosome 1:CM017321.1; chromosome 2:CM017322.1; chromosome 3:CM017323.1; chromosome 4:CM017324.1; chromosome 5:CM017325.1; chromosome 6:CM017326.1; chromosome 7:CM017327.1; chromosome 8:CM017328.1	VIBQ01	2019-07-12T00:00:00Z	ftp://ftp.ncbi.nlm.nih.gov/genomes/all/GCA/006/937/295/GCA_006937295.1_ASM693729v1	381948906	4602	82996.3	1444	60187804	60187804	41938413	41254595	38568636	37101600	36632470	35614808	27889292	687289	510
11_Fabids	193	Chamaecrista fasciculata	ftp://ftp.ncbi.nlm.nih.gov/genomes/all/GCA/003/254/925/GCA_003254925.1_ASM325492v1	SAMN08442482	PRJNA374770	GCA_003254925.1	Scaffold	33.6		QANZ01	2018-06-19T00:00:00Z	ftp://ftp.ncbi.nlm.nih.gov/genomes/all/GCA/003/254/925/GCA_003254925.1_ASM325492v1	429102545	56674	7571.42	471	723940	316121	215809	162222	128519	96643	72058	51625	31921	11197	200
11_Fabids	194	Vachellia collinsii	ftp://ftp.ncbi.nlm.nih.gov/genomes/all/GCA/006/871/305/GCA_006871305.1_Vcoll-BR_v1	SAMN09099243	PRJNA470667	GCA_006871305.1	Scaffold	33.3		QFDD01	2019-07-10T00:00:00Z	ftp://ftp.ncbi.nlm.nih.gov/genomes/all/GCA/006/871/305/GCA_006871305.1_Vcoll-BR_v1	461064704	122260	3771.18	1666	301273	38355	23012	15759	11222	8096	5668	3782	2347	1359	500
11_Fabids	195	Mimosa pudica	ftp://ftp.ncbi.nlm.nih.gov/genomes/all/GCA/003/254/945/GCA_003254945.1_ASM325494v1	SAMN08442486	PRJNA374770	GCA_003254945.1	Scaffold	32.9		QANV01	2018-06-19T00:00:00Z	ftp://ftp.ncbi.nlm.nih.gov/genomes/all/GCA/003/254/945/GCA_003254945.1_ASM325494v1	557202335	97892	5692.01	446	839160	344353	252136	198373	153844	119676	88032	59165	30591	4441	200
11_Fabids	196	Prosopis alba	ftp://ftp.ncbi.nlm.nih.gov/genomes/all/GCF/004/799/145/GCF_004799145.1_ASM479914v1	SAMN10988825	PRJNA534081	GCA_004799145.1	Contig	34.3		SMJV01	2019-04-17T00:00:00Z	ftp://ftp.ncbi.nlm.nih.gov/genomes/all/GCA/004/799/145/GCA_004799145.1_ASM479914v1	707161903	6087	116176	53804	2077851	907892	615569	472155	342379	248703	163162	97667	62920	43194	2167
11_Fabids	197	Cercis canadensis	ftp://ftp.ncbi.nlm.nih.gov/genomes/all/GCA/003/255/065/GCA_003255065.1_ASM325506v1	SAMN08442481	PRJNA374770	GCA_003255065.1	Scaffold	34		QAOA01	2018-06-19T00:00:00Z	ftp://ftp.ncbi.nlm.nih.gov/genomes/all/GCA/003/255/065/GCA_003255065.1_ASM325506v1	329325136	8828	37304.6	839	3438730	1926456	1048042	740456	570332	419957	312985	235376	139655	50239	348
11_Fabids	198	Nissolia schottii	ftp://ftp.ncbi.nlm.nih.gov/genomes/all/GCA/003/254/905/GCA_003254905.1_ASM325490v1	SAMN08442487	PRJNA374770	GCA_003254905.1	Scaffold	35.6		QANU01	2018-06-19T00:00:00Z	ftp://ftp.ncbi.nlm.nih.gov/genomes/all/GCA/003/254/905/GCA_003254905.1_ASM325490v1	466098644	116213	4010.73	421	2079550	1134304	703731	497247	313492	179654	94157	43003	11677	1428	200
11_Fabids	199	Arachis duranensis	ftp://ftp.ncbi.nlm.nih.gov/genomes/all/GCF/000/817/695/GCF_000817695.2_Aradu1.1	SAMN02982871	PRJNA316327	GCA_000817695.2	Chromosome	37.675	chromosome A01:NC_029772.2/CM003088.2; chromosome A02:NC_029773.2/CM003089.2; chromosome A03:NC_029774.2/CM003090.2; chromosome A04:NC_029775.2/CM003091.2; chromosome A05:NC_029776.2/CM003092.2; chromosome A06:NC_029777.2/CM003093.2; chromosome A07:NC_029778.2/CM003094.2; chromosome A08:NC_029779.2/CM003095.2; chromosome A09:NC_029780.2/CM003096.2; chromosome A10:NC_029781.2/CM003097.2	JQIN01	2015-01-13T00:00:00Z	ftp://ftp.ncbi.nlm.nih.gov/genomes/all/GCA/000/817/695/GCA_000817695.2_Aradu1.1	1084261490	3189	719483	15260	135057546	135057546	123556382	120672674	112752717	110037037	109463236	107035537	93869048	79126724	4014
11_Fabids	200	Arachis hypogaea	ftp://ftp.ncbi.nlm.nih.gov/genomes/all/GCF/003/086/295/GCF_003086295.2_arahy.Tifrunner.gnm1.KYV3	SAMN08051159	PRJNA476953	GCA_003086295.2	Chromosome	36.3472	chromosome Arahy.01:NC_037618.1/CM009801.1; chromosome Arahy.02:NC_037619.1/CM009802.1; chromosome Arahy.03:NC_037620.1/CM009803.1; chromosome Arahy.04:NC_037621.1/CM009804.1; chromosome Arahy.05:NC_037622.1/CM009805.1; chromosome Arahy.06:NC_037623.1/CM009806.1; chromosome Arahy.07:NC_037624.1/CM009807.1; chromosome Arahy.08:NC_037625.1/CM009808.1; chromosome Arahy.09:NC_037626.1/CM009809.1; chr…	PIVG01	2018-05-02T00:00:00Z	ftp://ftp.ncbi.nlm.nih.gov/genomes/all/GCA/003/086/295/GCA_003086295.2_arahy.Tifrunner.gnm1.KYV3	2557073284	385	6.64175e+06	17000	160879708	158625764	149299306	146725006	143813506	135150084	128801742	120519698	115930344	112420854	1000
11_Fabids	201	Arachis ipaensis	ftp://ftp.ncbi.nlm.nih.gov/genomes/all/GCF/000/816/755/GCF_000816755.2_Araip1.1	SAMN02982874	PRJNA316874	GCA_000816755.2	Chromosome	37.7748	chromosome B01:NC_029785.2/CM003054.2; chromosome B02:NC_029786.2/CM003055.2; chromosome B03:NC_029787.2/CM003056.2; chromosome B04:NC_029788.2/CM003057.2; chromosome B05:NC_029789.2/CM003058.2; chromosome B06:NC_029790.2/CM003059.2; chromosome B07:NC_029791.2/CM003060.2; chromosome B08:NC_029792.2/CM003061.2; chromosome B09:NC_029793.2/CM003062.2; chromosome B10:NC_029794.2/CM003063.2	JQIO01	2014-12-11T00:00:00Z	ftp://ftp.ncbi.nlm.nih.gov/genomes/all/GCA/000/816/755/GCA_000816755.2_Araip1.1	1353504219	997	2.4699e+06	13666	149900536	149900536	147089397	137414913	137147148	136175642	136109863	133615181	129606920	126351151	10021
11_Fabids	202	Arachis monticola	ftp://ftp.ncbi.nlm.nih.gov/genomes/all/GCA/003/063/285/GCA_003063285.2_ASM306328v2	SAMN08378480	PRJNA430760	GCA_003063285.2	Chromosome	37.4064	chromosome A01:CM009773.1; chromosome A02:CM009774.1; chromosome A03:CM009775.1; chromosome A04:CM009776.1; chromosome A05:CM009777.1; chromosome A06:CM009778.1; chromosome A07:CM009779.1; chromosome A08:CM009780.1; chromosome A09:CM009781.1; chromosome A10:CM009782.1; chromosome B01:CM009783.1; chromosome B02:CM009784.1; chromosome B03:CM009785.1; chromosome B04:CM009786.1; chromosome B05:CM0097…	QBTX01	2018-04-23T00:00:00Z	ftp://ftp.ncbi.nlm.nih.gov/genomes/all/GCA/003/063/285/GCA_003063285.2_ASM306328v2	2618653824	6909	379021	9388	163848611	160549902	147957399	140073190	138850997	124915013	121369520	107717502	100634791	72108380	200
11_Fabids	203	Lupinus angustifolius	ftp://ftp.ncbi.nlm.nih.gov/genomes/all/GCF/001/865/875/GCF_001865875.1_LupAngTanjil_v1.0	SAMN04215042	PRJNA356456	GCA_001865875.1	Chromosome	33.5664	chromosome LG01:NC_032009.1/CM007361.1; chromosome LG02:NC_032010.1/CM007362.1; chromosome LG03:NC_032011.1/CM007363.1; chromosome LG04:NC_032012.1/CM007364.1; chromosome LG05:NC_032013.1/CM007365.1; chromosome LG06:NC_032014.1/CM007366.1; chromosome LG07:NC_032015.1/CM007367.1; chromosome LG08:NC_032016.1/CM007368.1; chromosome LG09:NC_032017.1/CM007369.1; chromosome LG10:NC_032018.1/CM007370.1;…	MLAU01	2016-11-01T00:00:00Z	ftp://ftp.ncbi.nlm.nih.gov/genomes/all/GCA/001/865/875/GCA_001865875.1_LupAngTanjil_v1.0	609203021	14378	44883.4	1515	36457581	35963958	30153019	26376911	21988590	21299880	19782170	16588007	379011	37081	200
11_Fabids	204	Cicer arietinum	ftp://ftp.ncbi.nlm.nih.gov/genomes/all/GCF/000/331/145/GCF_000331145.1_ASM33114v1	SAMN02981489	PRJNA190909	GCA_000331145.1	Chromosome	32.6705	chromosome Ca1:NC_021160.1/CM001764.1; chromosome Ca2:NC_021161.1/CM001765.1; chromosome Ca3:NC_021162.1/CM001766.1; chromosome Ca4:NC_021163.1/CM001767.1; chromosome Ca5:NC_021164.1/CM001768.1; chromosome Ca6:NC_021165.1/CM001769.1; chromosome Ca7:NC_021166.1/CM001770.1; chromosome Ca8:NC_021167.1/CM001771.1; chloroplast Pltd:NC_011163.1/	ANPC01	2012-12-31T00:00:00Z	ftp://ftp.ncbi.nlm.nih.gov/genomes/all/GCA/000/331/145/GCA_000331145.1_ASM33114v1	530893862	7545	74490.5	1991	59463898	59463898	49191682	48359943	48169137	39989001	36634854	606834	278192	106563	200
11_Fabids	205	Cicer echinospermum	ftp://ftp.ncbi.nlm.nih.gov/genomes/all/GCA/002/896/215/GCA_002896215.2_S2Drd065_v0.5	SAMN07949201	PRJNA418060	GCA_002896215.2	Scaffold	31.7		PGTU02	2018-01-23T00:00:00Z	ftp://ftp.ncbi.nlm.nih.gov/genomes/all/GCA/002/896/215/GCA_002896215.2_S2Drd065_v0.5	657413940	17305	37989.8	7582	75586992	75586992	72823944	70018259	64554361	49619422	44419363	26020379	24972	10473	402
11_Fabids	206	Cicer reticulatum	ftp://ftp.ncbi.nlm.nih.gov/genomes/all/GCA/003/689/015/GCA_003689015.1_ASM368901v1	SAMN03105776	PRJNA263699	GCA_003689015.2	Chromosome	31.5188	linkage group LG1:CM010871.2; linkage group LG2:CM010872.2; linkage group LG3:CM010873.2; linkage group LG4:CM010874.2; linkage group LG5:CM010875.2; linkage group LG6:CM010876.2; linkage group LG7:CM010877.2; linkage group LG8:CM010878.2	QSLP02	2018-10-25T00:00:00Z		416688137	3657	72834.8	4273	58232078	58232078	51733763	43510909	42039305	39846785	36831687	33561908	142361	40474	1000
11_Fabids	207	Vicia faba	ftp://ftp.ncbi.nlm.nih.gov/genomes/all/GCA/001/375/635/GCA_001375635.1_VfEP_Reference-Unigene	SAMEA3311348	PRJEB8906	GCA_001375635.1	Contig	38.9		CSVX01	2015-03-24T00:00:00Z	ftp://ftp.ncbi.nlm.nih.gov/genomes/all/GCA/001/375/635/GCA_001375635.1_VfEP_Reference-Unigene	80362707	74659	1076.4	720	15650	3825	2989	2451	2054	1723	1415	1121	800	464	200
11_Fabids	208	Medicago truncatula	ftp://ftp.ncbi.nlm.nih.gov/genomes/all/GCF/000/219/495/GCF_000219495.3_MedtrA17_4.0	SAMN02299339	PRJNA10791	GCA_000219495.2	Chromosome	34.047	chromosome 1:NC_016407.2/CM001217.2; chromosome 2:NC_016408.2/CM001218.2; chromosome 3:NC_016409.2/CM001219.2; chromosome 4:NC_016410.2/CM001220.2; chromosome 5:NC_016411.2/CM001221.2; chromosome 6:NC_016412.2/CM001222.2; chromosome 7:NC_016413.2/CM001223.2; chromosome 8:NC_016414.2/CM001224.2; chloroplast Pltd:NC_003119.6/	APNO01	2011-08-12T00:00:00Z	ftp://ftp.ncbi.nlm.nih.gov/genomes/all/GCA/000/219/495/GCA_000219495.2_MedtrA17_4.0	412924424	2187	188809	2960	56582383	56582383	55515152	52991155	49172423	49172423	45729672	45569985	43630510	35275713	1004
11_Fabids	209	Trifolium subterraneum	ftp://ftp.ncbi.nlm.nih.gov/genomes/all/GCA/001/742/945/GCA_001742945.1_TSUd_r1.1	SAMD00004201	PRJDB2012	GCA_001742945.1	Scaffold	35.2		BCLP01	2016-07-16T00:00:00Z	ftp://ftp.ncbi.nlm.nih.gov/genomes/all/GCA/001/742/945/GCA_001742945.1_TSUd_r1.1	471834188	27424	17205.2	643	2878652	931133	628220	465152	367559	287605	228872	169217	113044	44597	300
11_Fabids	210	Lotus japonicus	ftp://ftp.ncbi.nlm.nih.gov/genomes/all/GCA/000/181/115/GCA_000181115.2_Lj3.0	SAMD00011082	PRJDA28941	GCA_000181115.2	Contig	36.6		BABK02	2008-05-28T00:00:00Z	ftp://ftp.ncbi.nlm.nih.gov/genomes/all/GCA/000/181/115/GCA_000181115.2_Lj3.0	394454697	44464	8871.33	2949	1138439	234620	134726	99378	49375	25054	16122	11004	7024	3600	23
11_Fabids	211	Abrus precatorius	ftp://ftp.ncbi.nlm.nih.gov/genomes/all/GCF/003/935/025/GCF_003935025.1_Abrus_2018	SAMN10039699	PRJNA510631	GCA_003935025.1	Scaffold	31.8		QYUI01	2018-12-11T00:00:00Z	ftp://ftp.ncbi.nlm.nih.gov/genomes/all/GCA/003/935/025/GCA_003935025.1_Abrus_2018	347230236	160	2.17019e+06	18245	39953474	39953474	39199135	37536197	36722865	35860769	35597320	30517451	26091613	22127310	1538
11_Fabids	212	Cajanus cajan	ftp://ftp.ncbi.nlm.nih.gov/genomes/all/GCF/000/340/665/GCF_000340665.1_C.cajan_V1.0	SAMN02981370	PRJNA376605	GCA_000340665.1	Chromosome	33.7105	chromosome 1:NC_033804.1/CM003603.1; chromosome 2:NC_033805.1/CM003604.1; chromosome 3:NC_033806.1/CM003605.1; chromosome 4:NC_033807.1/CM003606.1; chromosome 5:NC_033808.1/CM003607.1; chromosome 6:NC_033809.1/CM003608.1; chromosome 7:NC_033810.1/CM003609.1; chromosome 8:NC_033811.1/CM003610.1; chromosome 9:NC_033812.1/CM003611.1; chromosome 10:NC_033813.1/CM003612.1; chromosome 11:NC_033814.1/CM…	AGCT01	2013-02-13T00:00:00Z	ftp://ftp.ncbi.nlm.nih.gov/genomes/all/GCA/000/340/665/GCA_000340665.1_C.cajan_V1.0	592970700	36536	16229.8	398	48970052	36921656	23791330	20383548	10489139	555764	336530	191545	94507	34205	200
11_Fabids	213	Glycine max	ftp://ftp.ncbi.nlm.nih.gov/genomes/all/GCF/000/004/515/GCF_000004515.5_Glycine_max_v2.1	SAMN00002965	PRJNA19861	GCA_000004515.4	Chromosome	35.1153	chromosome 1:NC_016088.3/CM000834.3; chromosome 2:NC_016089.3/CM000835.3; chromosome 3:NC_016090.3/CM000836.3; chromosome 4:NC_016091.3/CM000837.3; chromosome 5:NC_038241.1/CM000838.2; chromosome 6:NC_038242.1/CM000839.3; chromosome 7:NC_038243.1/CM000840.3; chromosome 8:NC_038244.1/CM000841.3; chromosome 9:NC_038245.1/CM000842.3; chromosome 10:NC_038246.1/CM000843.3; chromosome 11:NC_038247.1/CM…	ACUP03	2010-01-05T00:00:00Z	ftp://ftp.ncbi.nlm.nih.gov/genomes/all/GCA/000/004/515/GCA_000004515.4_Glycine_max_v2.1	979046046	1579	821347	5451	58018742	56831624	51756343	51416486	50189764	48577505	47837940	45779781	42234498	37887014	1002
11_Fabids	214	Glycine soja	ftp://ftp.ncbi.nlm.nih.gov/genomes/all/GCF/004/193/775/GCF_004193775.1_ASM419377v2	SAMN09862384	PRJNA525136	GCA_004193775.2	Chromosome	35.2469	chromosome 1:NC_041002.1/CM014357.1; chromosome 2:NC_041003.1/CM014358.1; chromosome 3:NC_041004.1/CM014359.1; chromosome 4:NC_041005.1/CM014360.1; chromosome 5:NC_041006.1/CM014361.1; chromosome 6:NC_041007.1/CM014362.1; chromosome 7:NC_041008.1/CM014363.1; chromosome 8:NC_041009.1/CM014364.1; chromosome 9:NC_041010.1/CM014365.1; chromosome 10:NC_041011.1/CM014366.1; chromosome 11:NC_041012.1/CM…	QZWG01	2019-02-13T00:00:00Z	ftp://ftp.ncbi.nlm.nih.gov/genomes/all/GCA/004/193/775/GCA_004193775.2_ASM419377v2	1013766566	1120	905149	28570	57740077	57321005	53188214	51897278	50983946	50696784	48125468	47720463	44550447	38418214	5014
11_Fabids	215	Mucuna pruriens	ftp://ftp.ncbi.nlm.nih.gov/genomes/all/GCA/003/370/565/GCA_003370565.1_ASM337056v1	SAMN07821433	PRJNA414658	GCA_003370565.1	Scaffold	31.4		QJKJ01	2018-08-10T00:00:00Z	ftp://ftp.ncbi.nlm.nih.gov/genomes/all/GCA/003/370/565/GCA_003370565.1_ASM337056v1	397042285	18487	21476.8	15261	283104	74196	55186	44540	36596	30046	24324	19158	14475	9910	5002
11_Fabids	216	Phaseolus vulgaris	ftp://ftp.ncbi.nlm.nih.gov/genomes/all/GCF/000/499/845/GCF_000499845.1_PhaVulg1_0	SAMN02981484	PRJNA41439	GCA_000499845.1	Chromosome	36.2199	chromosome 1:NC_023759.1/CM002288.1; chromosome 2:NC_023758.1/CM002289.1; chromosome 3:NC_023757.1/CM002290.1; chromosome 4:NC_023756.1/CM002291.1; chromosome 5:NC_023755.1/CM002292.1; chromosome 6:NC_023754.1/CM002293.1; chromosome 7:NC_023753.1/CM002294.1; chromosome 8:NC_023752.1/CM002295.1; chromosome 9:NC_023751.1/CM002296.1; chromosome 10:NC_023750.1/CM002297.1; chromosome 11:NC_023749.1/CM…	ANNZ01	2013-11-26T00:00:00Z	ftp://ftp.ncbi.nlm.nih.gov/genomes/all/GCA/000/499/845/GCA_000499845.1_PhaVulg1_0	521076696	708	735984	3222	59662532	59662532	52284309	52205531	51758522	50367376	49040938	43275151	40819286	37469608	825
11_Fabids	217	Spatholobus suberectus	ftp://ftp.ncbi.nlm.nih.gov/genomes/all/GCA/004/329/165/GCA_004329165.1_ASM432916v1	SAMN09721040	PRJNA482912	GCA_004329165.1	Chromosome	31.7657	chromosome 1:CM014729.1; chromosome 2:CM014730.1; chromosome 3:CM014731.1; chromosome 4:CM014732.1; chromosome 5:CM014733.1; chromosome 6:CM014734.1; chromosome 7:CM014735.1; chromosome 8:CM014736.1; chromosome 9:CM014737.1	QUWT01	2019-03-06T00:00:00Z	ftp://ftp.ncbi.nlm.nih.gov/genomes/all/GCA/004/329/165/GCA_004329165.1_ASM432916v1	798470440	816	978518	22874	103566353	103566353	94306739	90601983	87126992	86984808	81784683	79556866	65679338	58394570	295
11_Fabids	218	Vigna angularis	ftp://ftp.ncbi.nlm.nih.gov/genomes/all/GCF/001/190/045/GCF_001190045.1_Vigan1.1	SAMN03074979	PRJNA328963	GCA_001190045.1	Chromosome	34.6231	chromosome 1:NC_030637.1/CM003371.1; chromosome 2:NC_030638.1/CM003372.1; chromosome 3:NC_030639.1/CM003373.1; chromosome 4:NC_030640.1/CM003374.1; chromosome 5:NC_030641.1/CM003375.1; chromosome 6:NC_030642.1/CM003376.1; chromosome 7:NC_030643.1/CM003377.1; chromosome 8:NC_030644.1/CM003378.1; chromosome 9:NC_030645.1/CM003379.1; chromosome 10:NC_030646.1/CM003380.1; chromosome 11:NC_030647.1/CM…	JZJH01	2015-07-30T00:00:00Z	ftp://ftp.ncbi.nlm.nih.gov/genomes/all/GCA/001/190/045/GCA_001190045.1_Vigan1.1	467300602	37727	12503	276	42234885	41204908	40424437	39404547	35625406	31747250	30791815	26588826	2211461	345246	200
11_Fabids	219	Vigna radiata	ftp://ftp.ncbi.nlm.nih.gov/genomes/all/GCF/000/741/045/GCF_000741045.1_Vradiata_ver6	SAMN02720863	PRJNA301363	GCA_000741045.2	Chromosome	34.3983	chromosome 1:NC_028351.1/CM003504.1; chromosome 2:NC_028352.1/CM003505.1; chromosome 3:NC_028353.1/CM003506.1; chromosome 4:NC_028354.1/CM003507.1; chromosome 5:NC_028355.1/CM003508.1; chromosome 6:NC_028356.1/CM003509.1; chromosome 7:NC_028357.1/CM003510.1; chromosome 8:NC_028358.1/CM003511.1; chromosome 9:NC_028359.1/CM003512.1; chromosome 10:NC_028360.1/CM003513.1; chromosome 11:NC_028361.1/CM…	JJMO01	2014-08-18T00:00:00Z	ftp://ftp.ncbi.nlm.nih.gov/genomes/all/GCF/000/741/045/GCF_000741045.1_Vradiata_ver6	463637892	2499	185529	1869	55601358	55601358	45727239	37180910	36501346	25360630	20996616	12950713	989601	424874	897
11_Fabids	220	Vigna unguiculata	ftp://ftp.ncbi.nlm.nih.gov/genomes/all/GCF/004/118/075/GCF_004118075.1_ASM411807v1	SAMN06674009	PRJNA521068	GCA_004118075.1	Chromosome	33.0643	chromosome 1:NC_040279.1/CM014066.1; chromosome 2:NC_040280.1/CM014067.1; chromosome 3:NC_040281.1/CM014068.1; chromosome 4:NC_040282.1/CM014069.1; chromosome 5:NC_040283.1/CM014070.1; chromosome 6:NC_040284.1/CM014071.1; chromosome 7:NC_040285.1/CM014072.1; chromosome 8:NC_040286.1/CM014073.1; chromosome 9:NC_040287.1/CM014074.1; chromosome 10:NC_040288.1/CM014075.1; chromosome 11:NC_040289.1/CM…	NBOW01	2019-01-29T00:00:00Z	ftp://ftp.ncbi.nlm.nih.gov/genomes/all/GCA/004/118/075/GCA_004118075.1_ASM411807v1	519066764	682	761095	43668	65292630	65292630	48746289	43933251	42129361	41684185	41327797	40876636	34463471	33908088	2922
11_Fabids	221	Quillaja saponaria	ftp://ftp.ncbi.nlm.nih.gov/genomes/all/GCA/003/338/715/GCA_003338715.1_Draft.Quillaja.v1.0	SAMN07812699	PRJNA415043	GCA_003338715.1	Contig	34.2		PVLG01	2018-07-24T00:00:00Z	ftp://ftp.ncbi.nlm.nih.gov/genomes/all/GCA/003/338/715/GCA_003338715.1_Draft.Quillaja.v1.0	248908185	48349	5148.16	4005	159952	14154	10761	8720	7256	6076	5057	4191	3396	2677	617
11_Fabids	222	Cannabis sativa	ftp://ftp.ncbi.nlm.nih.gov/genomes/all/GCA/003/417/725/GCA_003417725.2_ASM341772v2	SAMN09375800	PRJNA73819	GCA_003417725.2	Chromosome	34.1395	chromosome 1:CM011605.1; chromosome 2:CM011606.1; chromosome 3:CM011607.1; chromosome 4:CM011608.1; chromosome 5:CM011609.1; chromosome 6:CM011610.1; chromosome 7:CM011611.1; chromosome 8:CM011612.1; chromosome 9:CM011613.1; chromosome 10:CM011614.1	QKVJ02	2018-08-22T00:00:00Z	ftp://ftp.ncbi.nlm.nih.gov/genomes/all/GCA/003/417/725/GCA_003417725.2_ASM341772v2	1009674739	5303	427466	45272	100649945	95692043	94587701	92111078	87047438	77135887	76634836	49536295	890842	164611	2133
11_Fabids	223	Humulus lupulus	ftp://ftp.ncbi.nlm.nih.gov/genomes/all/GCA/000/831/365/GCA_000831365.1_hl_SW_version_1.0.fasta	SAMD00021060	PRJDB3233	GCA_000831365.1	Scaffold	39.9		BBPC01	2014-12-11T00:00:00Z		2049208583	132476	15468.5	5799	296819	93291	70285	56312	45828	37081	29136	22075	15202	7941	1000
11_Fabids	224	Parasponia andersonii	ftp://ftp.ncbi.nlm.nih.gov/genomes/all/GCA/002/914/805/GCA_002914805.1_PanWU01x14_asm01	SAMN03317003	PRJNA272473	GCA_002914805.1	Scaffold	32.6		JXTB01	2018-02-02T00:00:00Z	ftp://ftp.ncbi.nlm.nih.gov/genomes/all/GCA/002/914/805/GCA_002914805.1_PanWU01x14_asm01	475834238	2732	174171	10272	4735547	1872875	1453752	1119627	871043	712846	595084	463341	331980	192827	501
11_Fabids	225	Trema orientale	ftp://ftp.ncbi.nlm.nih.gov/genomes/all/GCA/002/914/845/GCA_002914845.1_TorRG33x02_asm01	SAMN03322532	PRJNA272482	GCA_002914845.1	Scaffold	31.8		JXTC01	2018-02-02T00:00:00Z	ftp://ftp.ncbi.nlm.nih.gov/genomes/all/GCA/002/914/845/GCA_002914845.1_TorRG33x02_asm01	387958189	2756	140769	8094	5284217	1965675	1461292	1137696	884068	656203	499996	377939	266704	147486	501
11_Fabids	226	Artocarpus camansi	ftp://ftp.ncbi.nlm.nih.gov/genomes/all/GCA/002/024/485/GCA_002024485.1_Acamansi1.0	SAMN04244126	PRJNA301299	GCA_002024485.1	Scaffold	33.2		LNSY01	2017-03-09T00:00:00Z	ftp://ftp.ncbi.nlm.nih.gov/genomes/all/GCA/002/024/485/GCA_002024485.1_Acamansi1.0	631307653	396025	1594.11	1072	58139	6392	4710	3721	3004	2430	1949	1521	1123	724	201
11_Fabids	227	Ficus carica	ftp://ftp.ncbi.nlm.nih.gov/genomes/all/GCA/002/002/945/GCA_002002945.1_F.carica_assembly01	SAMD00051603	PRJDB4615	GCA_002002945.1	Scaffold	0		BDEM01	2017-01-27T21:17:00Z	ftp://ftp.ncbi.nlm.nih.gov/genomes/all/GCA/002/002/945/GCA_002002945.1_F.carica_assembly01	247090738	27995	8826.25	893	1764766	631211	416045	293944	218355	166092	121149	83459	48435	6940	479
11_Fabids	228	Ficus erecta	ftp://ftp.ncbi.nlm.nih.gov/genomes/all/GCA/008/635/985/GCA_008635985.1_FER_r1.1	SAMD00181892	PRJDB8644	GCA_008635985.1	Contig	34.3		BKCH01	2019-09-18T23:55:00Z	ftp://ftp.ncbi.nlm.nih.gov/genomes/all/GCA/008/635/985/GCA_008635985.1_FER_r1.1	595834738	2455	242703	75811	9725511	5349924	2859398	1677621	1084892	697200	482906	317287	187240	83575	3481
11_Fabids	229	Morus notabilis	ftp://ftp.ncbi.nlm.nih.gov/genomes/all/GCF/000/414/095/GCF_000414095.1_ASM41409v2	SAMN02141246	PRJNA202089	GCA_000414095.2	Scaffold	35.5		ATGF01	2013-06-24T00:00:00Z	ftp://ftp.ncbi.nlm.nih.gov/genomes/all/GCA/000/414/095/GCA_000414095.2_ASM41409v2	320378613	31301	10235.4	487	3477367	1112492	771778	618370	503489	405448	318277	229757	143304	42751	200
11_Fabids	230	Ochetophila trinervis	ftp://ftp.ncbi.nlm.nih.gov/genomes/all/GCA/003/254/975/GCA_003254975.1_ASM325497v1	SAMN08442484	PRJNA374770	GCA_003254975.1	Scaffold	33.2		QANX01	2018-06-19T00:00:00Z	ftp://ftp.ncbi.nlm.nih.gov/genomes/all/GCA/003/254/975/GCA_003254975.1_ASM325497v1	309116026	8237	37527.7	8083	698860	279342	216079	173255	140470	115526	93446	72153	51985	31805	200
11_Fabids	231	Ziziphus jujuba	ftp://ftp.ncbi.nlm.nih.gov/genomes/all/GCF/000/826/755/GCF_000826755.1_ZizJuj_1.1	SAMN02918186	PRJNA315994	GCA_000826755.1	Chromosome	34.1503	chromosome 1:NC_029679.1/CM003114.1; chromosome 2:NC_029680.1/CM003115.1; chromosome 3:NC_029681.1/CM003116.1; chromosome 4:NC_029682.1/CM003117.1; chromosome 5:NC_029683.1/CM003118.1; chromosome 6:NC_029684.1/CM003119.1; chromosome 7:NC_029685.1/CM003120.1; chromosome 8:NC_029686.1/CM003121.1; chromosome 9:NC_029687.1/CM003122.1; chromosome 10:NC_029688.1/CM003123.1; chromosome 11:NC_029689.1/CM…	JREP01	2014-10-24T00:00:00Z	ftp://ftp.ncbi.nlm.nih.gov/genomes/all/GCA/000/826/755/GCA_000826755.1_ZizJuj_1.1	437753511	5897	91408.1	4533	42390363	31365312	30445767	27986743	26737297	25259912	20983256	19346091	222730	82087	1001
11_Fabids	232	Prunus avium	ftp://ftp.ncbi.nlm.nih.gov/genomes/all/GCF/002/207/925/GCF_002207925.1_PAV_r1.0	SAMD00052827	PRJDB4877	GCA_002207925.1	Scaffold	38.8		BDGV01	2017-06-01T00:00:00Z	ftp://ftp.ncbi.nlm.nih.gov/genomes/all/GCA/002/207/925/GCA_002207925.1_PAV_r1.0	272361615	10148	26839	2127	1460269	725235	530305	404730	301741	219566	153183	103385	57664	19672	1000
11_Fabids	233	Prunus dulcis	ftp://ftp.ncbi.nlm.nih.gov/genomes/all/GCA/902/201/215/GCA_902201215.1_ALMONDv2	SAMEA5704668	PRJEB32994	GCA_902201215.1	Chromosome	37.7187	chromosome 1:LR694006.1; chromosome 2:LR694007.1; chromosome 3:LR694008.1; chromosome 4:LR694009.1; chromosome 5:LR694010.1; chromosome 6:LR694011.1; chromosome 7:LR694012.1; chromosome 8:LR694013.1	CABIKO01	2019-09-10T00:00:00Z	ftp://ftp.ncbi.nlm.nih.gov/genomes/all/GCA/902/201/215/GCA_902201215.1_ALMONDv2	227599157	691	329376	21131	43996934	43996934	29596931	29596931	26138581	24375383	24073526	21340587	20428636	18233718	696
11_Fabids	234	Prunus mume	ftp://ftp.ncbi.nlm.nih.gov/genomes/all/GCF/000/346/735/GCF_000346735.1_P.mume_V1.0	SAMN02981503	PRJNA246160	GCA_000346735.1	Chromosome	38.327	linkage group LG1:NC_024126.1/CM001826.1; linkage group LG2:NC_024127.1/CM001827.1; linkage group LG3:NC_024128.1/CM001828.1; linkage group LG4:NC_024129.1/CM001829.1; linkage group LG5:NC_024130.1/CM001830.1; linkage group LG6:NC_024131.1/CM001831.1; linkage group LG7:NC_024132.1/CM001832.1; linkage group LG8:NC_024133.1/CM001833.1; plastid Pltd:NC_023798.1/	AOHF01	2013-02-28T00:00:00Z	ftp://ftp.ncbi.nlm.nih.gov/genomes/all/GCA/000/346/735/GCA_000346735.1_P.mume_V1.0	234030239	8626	28666.1	356	42086771	42086771	26753024	26133890	26133890	24358521	23934096	21292200	17044513	356351	200
11_Fabids	235	Prunus persica	ftp://ftp.ncbi.nlm.nih.gov/genomes/all/GCF/000/346/465/GCF_000346465.2_Prunus_persica_NCBIv2	SAMN02981429	PRJNA31227	GCA_000346465.2	Chromosome	37.6659	chromosome G1:NC_034009.1/CM007651.1; chromosome G2:NC_034010.1/CM007652.1; chromosome G3:NC_034011.1/CM007653.1; chromosome G4:NC_034012.1/CM007654.1; chromosome G5:NC_034013.1/CM007655.1; chromosome G6:NC_034014.1/CM007656.1; chromosome G7:NC_034015.1/CM007657.1; chromosome G8:NC_034016.1/CM007658.1; chloroplast Pltd:NC_014697.1/	AKXU02	2013-03-14T00:00:00Z	ftp://ftp.ncbi.nlm.nih.gov/genomes/all/GCA/000/346/465/GCA_000346465.2_Prunus_persica_NCBIv2	227569171	192	1.18526e+06	6011	47851208	47851208	47851208	30767194	30405870	27368013	25843236	25843236	22573980	22388614	1061
11_Fabids	236	Prunus yedoensis	ftp://ftp.ncbi.nlm.nih.gov/genomes/all/GCA/900/382/725/GCA_900382725.1_Pyn.v1	SAMEA4609968	PRJEB25736	GCA_900382725.1	Scaffold	37.6		OSDV01	2018-07-08T00:00:00Z		319209792	4016	79484.5	47163	960226	393970	282397	229596	186814	145140	116663	90349	64274	40592	1024
11_Fabids	237	Malus baccata	ftp://ftp.ncbi.nlm.nih.gov/genomes/all/GCA/006/547/085/GCA_006547085.1_Malus_baccata_v1.0	SAMN08323692	PRJNA428857	GCA_006547085.1	Scaffold	35.1		VIEB01	2019-07-03T00:00:00Z	ftp://ftp.ncbi.nlm.nih.gov/genomes/all/GCA/006/547/085/GCA_006547085.1_Malus_baccata_v1.0	674411566	47473	14206.2	311	7162432	1477709	1012683	776845	603899	481808	374101	271044	176343	68928	201
11_Fabids	238	Malus domestica	ftp://ftp.ncbi.nlm.nih.gov/genomes/all/GCF/000/148/765/GCF_000148765.1_MalDomGD1.0	SAMN02981243	PRJNA28845	GCA_000148765.2	Chromosome	45.3151	chromosome 1:CM001026.1; chromosome 2:CM001027.1; chromosome 3:CM001028.1; chromosome 4:CM001029.1; chromosome 5:CM001030.1; chromosome 6:CM001031.1; chromosome 7:CM001032.1; chromosome 8:CM001033.1; chromosome 9:CM001034.1; chromosome 10:CM001035.1; chromosome 11:CM001036.1; chromosome 12:CM001037.1; chromosome 13:CM001038.1; chromosome 14:CM001039.1; chromosome 15:CM001040.1; chromosome 16:CM00…	ACYM01	2010-09-03T00:00:00Z	ftp://ftp.ncbi.nlm.nih.gov/genomes/all/GCA/000/148/765/GCA_000148765.2_MalDomGD1.0	1874765253	1667	1.49861e+06	720709	47181002	33710802	29289779	8951201	4521715	2966274	2164012	1506679	1089109	687657	1627
11_Fabids	239	Pyrus betulifolia	ftp://ftp.ncbi.nlm.nih.gov/genomes/all/GCA/007/844/245/GCA_007844245.1_ASM784424v1	SAMN11264821	PRJNA529328	GCA_007844245.1	Chromosome	37.5496	chromosome 1:CM017587.1; chromosome 2:CM017588.1; chromosome 3:CM017589.1; chromosome 4:CM017590.1; chromosome 5:CM017591.1; chromosome 6:CM017592.1; chromosome 7:CM017593.1; chromosome 8:CM017594.1; chromosome 9:CM017595.1; chromosome 10:CM017596.1; chromosome 11:CM017597.1; chromosome 12:CM017598.1; chromosome 13:CM017599.1; chromosome 14:CM017600.1; chromosome 15:CM017601.1; chromosome 16:CM01…	VDML01	2019-08-05T00:00:00Z	ftp://ftp.ncbi.nlm.nih.gov/genomes/all/GCA/007/844/245/GCA_007844245.1_ASM784424v1	532747033	139	3.83271e+06	94493	45524468	37229796	35167583	31362181	30997884	28122385	27936733	26976076	25444318	23206459	2695
11_Fabids	240	Pyrus x bretschneideri	ftp://ftp.ncbi.nlm.nih.gov/genomes/all/GCF/000/315/295/GCF_000315295.1_Pbr_v1.0	SAMN01797448	PRJNA259338	GCA_000315295.1	Scaffold	37.5		AJSU01	2012-11-21T00:00:00Z	ftp://ftp.ncbi.nlm.nih.gov/genomes/all/GCA/000/315/295/GCA_000315295.1_Pbr_v1.0	508550595	2182	233066	114188	4167794	1419593	1090698	845292	654154	535028	427348	325190	221795	140066	206
11_Fabids	241	Pyrus ussuriensis x Pyrus communis	ftp://ftp.ncbi.nlm.nih.gov/genomes/all/GCA/008/932/095/GCA_008932095.1_ASM893209v1	SAMN10188208	PRJNA494996	GCA_008932095.1	Chromosome	37.3742	chromosome 1:CM018505.1; chromosome 2:CM018506.1; chromosome 3:CM018507.1; chromosome 4:CM018508.1; chromosome 5:CM018509.1; chromosome 6:CM018510.1; chromosome 7:CM018511.1; chromosome 8:CM018512.1; chromosome 9:CM018513.1; chromosome 10:CM018514.1; chromosome 11:CM018515.1; chromosome 12:CM018516.1; chromosome 13:CM018517.1; chromosome 14:CM018518.1; chromosome 15:CM018519.1; chromosome 16:CM01…	SMOL01	2019-10-09T00:00:00Z	ftp://ftp.ncbi.nlm.nih.gov/genomes/all/GCA/008/932/095/GCA_008932095.1_ASM893209v1	510637391	785	650493	53000	31939264	30711404	29883466	27579411	25000300	23451046	22600500	22291374	21381420	439659	948
11_Fabids	242	Dryas drummondii	ftp://ftp.ncbi.nlm.nih.gov/genomes/all/GCA/003/254/865/GCA_003254865.1_ASM325486v1	SAMN08442485	PRJNA374770	GCA_003254865.1	Scaffold	36.4		QANW01	2018-06-19T00:00:00Z	ftp://ftp.ncbi.nlm.nih.gov/genomes/all/GCA/003/254/865/GCA_003254865.1_ASM325486v1	225547060	13357	16886.1	324	4847072	3584759	2236176	1543616	1240248	931783	712713	504074	324189	160079	200
11_Fabids	243	Purshia tridentata	ftp://ftp.ncbi.nlm.nih.gov/genomes/all/GCA/003/254/885/GCA_003254885.1_ASM325488v1	SAMN08442488	PRJNA374770	GCA_003254885.1	Scaffold	36.1		QANT01	2018-06-19T00:00:00Z	ftp://ftp.ncbi.nlm.nih.gov/genomes/all/GCA/003/254/885/GCA_003254885.1_ASM325488v1	175970657	9353	18814.3	10855	251455	103678	72003	55099	43761	33921	26846	20503	14383	9037	302
11_Fabids	244	Geum urbanum	ftp://ftp.ncbi.nlm.nih.gov/genomes/all/GCA/900/236/755/GCA_900236755.1_G_urb_d1	SAMEA104363642	PRJEB23412	GCA_900236755.1	Scaffold	0		OEJZ01	2018-01-15T00:00:00Z	ftp://ftp.ncbi.nlm.nih.gov/genomes/all/GCA/900/236/755/GCA_900236755.1_G_urb_d1	1217035493	170029	7157.81	1839	411835	76513	54212	41287	32102	24601	18325	12619	7079	2531	150
11_Fabids	245	Fragaria nubicola	ftp://ftp.ncbi.nlm.nih.gov/genomes/all/GCA/000/511/995/GCA_000511995.1_FNU_r1.1	SAMD00010927	PRJDB1480	GCA_000511995.1	Scaffold	38.2		BATW01	2013-11-27T00:00:00Z	ftp://ftp.ncbi.nlm.nih.gov/genomes/all/GCA/000/511/995/GCA_000511995.1_FNU_r1.1	203686407	210780	966.35	594	27253	5644	3517	2415	1738	1291	982	750	567	419	300
11_Fabids	246	Fragaria orientalis	ftp://ftp.ncbi.nlm.nih.gov/genomes/all/GCA/000/517/285/GCA_000517285.1_FOR_r1.1	SAMD00010919	PRJDB1481	GCA_000517285.1	Scaffold	38.1		BATX01	2013-11-27T00:00:00Z	ftp://ftp.ncbi.nlm.nih.gov/genomes/all/GCA/000/517/285/GCA_000517285.1_FOR_r1.1	214184023	323163	662.77	496	12564	2158	1447	1099	879	722	602	506	428	358	300
11_Fabids	247	Fragaria vesca	ftp://ftp.ncbi.nlm.nih.gov/genomes/all/GCF/000/184/155/GCF_000184155.1_FraVesHawaii_1.0	SAMN00120060	PRJNA60037	GCA_000184155.1	Chromosome	38.9793	linkage group LG1:NC_020491.1/CM001053.1; linkage group LG2:NC_020492.1/CM001054.1; linkage group LG3:NC_020493.1/CM001055.1; linkage group LG4:NC_020494.1/CM001056.1; linkage group LG5:NC_020495.1/CM001057.1; linkage group LG6:NC_020496.1/CM001058.1; linkage group LG7:NC_020497.1/CM001059.1; chloroplast Pltd:NC_015206.1/	AEMH01	2010-12-22T00:00:00Z	ftp://ftp.ncbi.nlm.nih.gov/genomes/all/GCF/000/184/155/GCF_000184155.1_FraVesHawaii_1.0	214373013	3048	70332.4	1182	38222195	38222195	33308843	33308843	29328693	27879571	27879571	23403891	23292877	22681039	254
11_Fabids	248	Fragaria x ananassa	ftp://ftp.ncbi.nlm.nih.gov/genomes/all/GCA/000/511/835/GCA_000511835.1_FAN_r1.1		PRJDB1477	GCA_000511835.1	Scaffold	39.2		BATT01	2013-11-27T00:00:00Z		697762269	625966	1114.7	535	51398	8528	5351	3814	2753	2201	1473	858	582	414	300
11_Fabids	249	Rosa chinensis	ftp://ftp.ncbi.nlm.nih.gov/genomes/all/GCF/002/994/745/GCF_002994745.1_RchiOBHm-V2	SAMN07737764	PRJNA438537	GCA_002994745.1	Chromosome	38.8437	chromosome 1:NC_037088.1/CM009582.1; chromosome 2:NC_037089.1/CM009583.1; chromosome 3:NC_037090.1/CM009584.1; chromosome 4:NC_037091.1/CM009585.1; chromosome 5:NC_037092.1/CM009586.1; chromosome 6:NC_037093.1/CM009587.1; chromosome 7:NC_037094.1/CM009588.1; mitochondrion MT:CM009589.1; chloroplast Pltd:CM009590.1	PDCK01	2018-03-13T00:00:00Z	ftp://ftp.ncbi.nlm.nih.gov/genomes/all/GCA/002/994/745/GCA_002994745.1_RchiOBHm-V2	513854168	45	1.1419e+07	218128	89953796	89953796	88556329	88556329	70290800	69643165	69643165	68490202	67241324	49737312	94193
11_Fabids	250	Rosa lucieae	ftp://ftp.ncbi.nlm.nih.gov/genomes/all/GCA/006/954/505/GCA_006954505.1_ILVO_Rwic_1.0	SAMN10395143	PRJNA504542	GCA_006954505.1	Scaffold	38.7		RQIQ01	2019-07-12T00:00:00Z	ftp://ftp.ncbi.nlm.nih.gov/genomes/all/GCA/006/954/505/GCA_006954505.1_ILVO_Rwic_1.0	786105075	500476	1570.71	291	136561	39031	27224	20212	15014	10695	6933	3887	1500	399	200
11_Fabids	251	Rosa x damascena	ftp://ftp.ncbi.nlm.nih.gov/genomes/all/GCA/001/662/545/GCA_001662545.1_ASM166254v1	SAMN05017599	PRJNA322107	GCA_001662545.1	Scaffold	37.6		LYNE01	2016-06-13T00:00:00Z	ftp://ftp.ncbi.nlm.nih.gov/genomes/all/GCA/001/662/545/GCA_001662545.1_ASM166254v1	711719955	307872	2311.74	314	548636	132352	86789	58932	40848	27573	17639	9557	2995	723	200
11_Fabids	252	Boehmeria nivea	ftp://ftp.ncbi.nlm.nih.gov/genomes/all/GCA/002/937/015/GCA_002937015.1_ASM293701v1	SAMN07982878	PRJNA417329	GCA_002937015.1	Scaffold	32.7		PHNS01	2018-02-21T00:00:00Z	ftp://ftp.ncbi.nlm.nih.gov/genomes/all/GCA/002/937/015/GCA_002937015.1_ASM293701v1	344616830	12775	26975.9	1907	7341248	5373165	3898188	2941104	1616515	1094501	666391	334573	83294	20393	990
11_Fabids	253	Begonia fuchsioides	ftp://ftp.ncbi.nlm.nih.gov/genomes/all/GCA/003/255/005/GCA_003255005.1_ASM325500v1	SAMN08442479	PRJNA374770	GCA_003255005.1	Scaffold	37.4		QAOC01	2018-06-19T00:00:00Z	ftp://ftp.ncbi.nlm.nih.gov/genomes/all/GCA/003/255/005/GCA_003255005.1_ASM325500v1	373914052	55006	6797.7	481	1899432	683419	419274	292035	219486	154265	101506	57770	23963	4358	200
11_Fabids	254	Benincasa hispida	ftp://ftp.ncbi.nlm.nih.gov/genomes/all/GCA/009/727/055/GCA_009727055.1_ASM972705v1	SAMN08364809	PRJNA430006	GCA_009727055.1	Chromosome	34.9866	chromosome 1:CM019126.1; chromosome 2:CM019127.1; chromosome 3:CM019128.1; chromosome 4:CM019129.1; chromosome 5:CM019130.1; chromosome 6:CM019131.1; chromosome 7:CM019132.1; chromosome 8:CM019133.1; chromosome 9:CM019134.1; chromosome 10:CM019135.1; chromosome 11:CM019136.1; chromosome 12:CM019137.1	WEIL01	2019-12-02T00:00:00Z	ftp://ftp.ncbi.nlm.nih.gov/genomes/all/GCA/009/727/055/GCA_009727055.1_ASM972705v1	912951219	1791	509744	2828	96417420	96417420	92436997	81212075	73505063	69945952	65296742	62154845	61298635	51948642	913
11_Fabids	255	Citrullus lanatus	ftp://ftp.ncbi.nlm.nih.gov/genomes/all/GCA/000/238/415/GCA_000238415.1_CiLa_1.0	SAMN02981367	PRJNA72695	GCA_000238415.2	Chromosome	33.8103	chromosome 1:CM018018.1; chromosome 2:CM018019.1; chromosome 3:CM018020.1; chromosome 4:CM018021.1; chromosome 5:CM018022.1; chromosome 6:CM018023.1; chromosome 7:CM018024.1; chromosome 8:CM018025.1; chromosome 9:CM018026.1; chromosome 10:CM018027.1; chromosome 11:CM018028.1	AGCB02	2011-12-13T00:00:00Z		321046825	113	7976.71	2058	227474	80742	57570	43786	34468	26400	19808	13977	8556	4005	200
11_Fabids	256	Cucumis melo	ftp://ftp.ncbi.nlm.nih.gov/genomes/all/GCF/000/313/045/GCF_000313045.1_ASM31304v1	SAMEA2272451	PRJEB68	GCA_000313045.1	Scaffold	34.9008	chloroplast Pltd:NC_015983.1/	CAJI01	2012-06-29T00:00:00Z	ftp://ftp.ncbi.nlm.nih.gov/genomes/all/GCA/000/313/045/GCA_000313045.1_ASM31304v1	374928489	31464	11916.1	346	9149724	8244739	6895065	6093421	5552556	4278129	3741400	2779969	1994965	1035017	100
11_Fabids	257	Cucumis sativus	ftp://ftp.ncbi.nlm.nih.gov/genomes/all/GCF/000/004/075/GCF_000004075.2_ASM407v2	SAMN02953750	PRJNA33619	GCA_000004075.2	Chromosome	32.7902	chromosome 1:NC_026655.1/CM002922.1; chromosome 2:NC_026656.1/CM002923.1; chromosome 3:NC_026657.1/CM002924.1; chromosome 4:NC_026658.1/CM002925.1; chromosome 5:NC_026659.1/CM002926.1; chromosome 6:NC_026660.1/CM002927.1; chromosome 7:NC_026661.1/CM002928.1; mitochondrion 1:NC_016005.1/CM002922.1; mitochondrion 2:NC_016004.1/CM002923.1; mitochondrion 3:NC_016006.1/CM002924.1; chloroplast Pltd:NC_…	ACHR02	2009-10-20T00:00:00Z	ftp://ftp.ncbi.nlm.nih.gov/genomes/all/GCA/000/004/075/GCA_000004075.2_ASM407v2	226211662	190	2.66131e+06	160015	40877379	40877379	32926272	32926272	31913682	31125843	31125843	26827763	24837039	22466726	5476
11_Fabids	258	Lagenaria siceraria	ftp://ftp.ncbi.nlm.nih.gov/genomes/all/GCA/003/268/545/GCA_003268545.1_Lsi_v1.0	SAMN07159290	PRJNA387611	GCA_003268545.1	Scaffold	30.1		NHZF01	2018-06-27T00:00:00Z	ftp://ftp.ncbi.nlm.nih.gov/genomes/all/GCA/003/268/545/GCA_003268545.1_Lsi_v1.0	313386576	438	715494	1514	19050912	18344533	16967707	11829183	10302832	8701157	5988221	5301321	2863114	1498876	502
11_Fabids	259	Cucurbita argyrosperma	ftp://ftp.ncbi.nlm.nih.gov/genomes/all/GCA/004/115/005/GCA_004115005.1_ASM411500v1	SAMN10795727	PRJNA485527	GCA_004115005.1	Scaffold	36.2006	chloroplast Pltd:CM014103.1	SDJN01	2019-01-28T00:00:00Z		230033826	938	245239	94588	2746581	1714205	1298813	1081107	812330	619148	471742	348436	219873	121489	2697
11_Fabids	260	Cucurbita moschata	ftp://ftp.ncbi.nlm.nih.gov/genomes/all/GCF/002/738/365/GCF_002738365.1_Cmos_1.0	SAMN06886672	PRJNA418582	GCA_002738365.1	Scaffold	36.8		NEWM01	2017-10-31T00:00:00Z	ftp://ftp.ncbi.nlm.nih.gov/genomes/all/GCA/002/738/365/GCA_002738365.1_Cmos_1.0	269943085	3500	77126.6	1090	11258782	7180833	5920793	5600204	4735188	3995720	2561952	1987898	1129985	593097	500
11_Fabids	261	Momordica charantia	ftp://ftp.ncbi.nlm.nih.gov/genomes/all/GCF/001/995/035/GCF_001995035.1_ASM199503v1	SAMD00048603	PRJDB4642	GCA_001995035.1	Scaffold	35.8		BDCS01	2016-12-26T20:44:00Z	ftp://ftp.ncbi.nlm.nih.gov/genomes/all/GCA/001/995/035/GCA_001995035.1_ASM199503v1	285613949	1052	271496	37328	7185522	5307744	3286223	1778698	1334049	1100631	850568	589858	388474	193022	1004
11_Fabids	262	Datisca glomerata	ftp://ftp.ncbi.nlm.nih.gov/genomes/all/GCA/003/255/025/GCA_003255025.1_ASM325502v1	SAMN08442483	PRJNA374770	GCA_003255025.1	Scaffold	34.5		QANY01	2018-06-19T00:00:00Z	ftp://ftp.ncbi.nlm.nih.gov/genomes/all/GCA/003/255/025/GCA_003255025.1_ASM325502v1	688404099	13864	49654.1	442	6997071	2880265	2386593	1785324	1545777	1186304	949652	739139	517372	265133	200
11_Fabids	263	Alnus glutinosa	ftp://ftp.ncbi.nlm.nih.gov/genomes/all/GCA/003/254/965/GCA_003254965.1_ASM325496v1	SAMN08442478	PRJNA374770	GCA_003254965.1	Scaffold	33		QAOD01	2018-06-19T00:00:00Z	ftp://ftp.ncbi.nlm.nih.gov/genomes/all/GCA/003/254/965/GCA_003254965.1_ASM325496v1	611874127	167345	3656.36	523	799831	347897	245612	185871	138007	96611	55573	17671	4765	1155	200
11_Fabids	264	Betula nana	ftp://ftp.ncbi.nlm.nih.gov/genomes/all/GCA/000/327/005/GCA_000327005.1_ASM32700v1	SAMEA2271942	PRJEB576	GCA_000327005.1	Scaffold	38.4		CAOK01	2012-11-28T00:00:00Z	ftp://ftp.ncbi.nlm.nih.gov/genomes/all/GCA/000/327/005/GCA_000327005.1_ASM32700v1	564011153	551915	1021.92	151	398841	84118	54704	38564	27362	18694	11705	5972	1441	222	100
11_Fabids	265	Betula pendula	ftp://ftp.ncbi.nlm.nih.gov/genomes/all/GCA/900/184/695/GCA_900184695.1_Bpev01	SAMEA104091830	PRJEB14544	GCA_900184695.1	Scaffold	43.4386	mitochondrion MT:LT855379.1; chloroplast Pltd:LT855378.1	FXXK01	2017-05-25T00:00:00Z	ftp://ftp.ncbi.nlm.nih.gov/genomes/all/GCA/900/184/695/GCA_900184695.1_Bpev01	435914794	5644	77235.1	19327	3196900	1102023	651836	458835	339469	239696	185460	133111	85299	43325	1165
11_Fabids	266	Casuarina equisetifolia	ftp://ftp.ncbi.nlm.nih.gov/genomes/all/GCA/003/795/335/GCA_003795335.1_ASM379533v1	SAMN08939822	PRJNA450482	GCA_003795335.1	Scaffold	36.1		RDRV01	2018-11-19T00:00:00Z		301458157	2936	102676	2108	3970637	2772273	2045874	1530944	1247512	1020118	792836	557366	347266	127064	506
11_Fabids	267	Casuarina glauca	ftp://ftp.ncbi.nlm.nih.gov/genomes/all/GCA/003/255/045/GCA_003255045.1_ASM325504v1	SAMN08442480	PRJNA374770	GCA_003255045.1	Scaffold	36		QAOB01	2018-06-19T00:00:00Z	ftp://ftp.ncbi.nlm.nih.gov/genomes/all/GCA/003/255/045/GCA_003255045.1_ASM325504v1	282810774	39787	7108.12	344	6487367	3014060	2084067	1531651	1146642	912668	629167	387466	207270	32449	200
11_Fabids	268	Castanea mollissima	ftp://ftp.ncbi.nlm.nih.gov/genomes/all/GCA/000/763/605/GCA_000763605.1_ASM76360v1	SAMN02640765	PRJNA46687	GCA_000763605.1	Scaffold	36.1		JRKL01	2014-10-03T00:00:00Z	ftp://ftp.ncbi.nlm.nih.gov/genomes/all/GCA/000/763/605/GCA_000763605.1_ASM76360v1	833240550	133589	6237.34	1294	429344	112581	78859	58619	43902	32186	21980	13370	6050	1958	223
11_Fabids	269	Fagus sylvatica	ftp://ftp.ncbi.nlm.nih.gov/genomes/all/GCA/003/347/535/GCA_003347535.1_UKW_Fsyl_0.5	SAMN08948264	PRJNA450822	GCA_003347535.1	Scaffold	34.9		QCXR01	2018-07-31T00:00:00Z	ftp://ftp.ncbi.nlm.nih.gov/genomes/all/GCA/003/347/535/GCA_003347535.1_UKW_Fsyl_0.5	428199988	8673	49371.6	28053	779643	268322	192582	148903	117255	91383	71755	53828	37729	23699	1015
11_Fabids	270	Quercus lobata	ftp://ftp.ncbi.nlm.nih.gov/genomes/all/GCA/001/633/185/GCA_001633185.2_ValleyOak3.0	SAMN10584531	PRJNA574457	GCA_001633185.2	Chromosome	35.4253	chromosome 1:NC_044904.1/CM012293.1; chromosome 2:NC_044905.1/CM012294.1; chromosome 3:NC_044906.1/CM012295.1; chromosome 4:NC_044907.1/CM012296.1; chromosome 5:NC_044908.1/CM012297.1; chromosome 6:NC_044909.1/CM012298.1; chromosome 7:NC_044910.1/CM012299.1; chromosome 8:NC_044911.1/CM012300.1; chromosome 9:NC_044912.1/CM012301.1; chromosome 10:NC_044913.1/CM012302.1; chromosome 11:NC_044914.1/CM…	LRBV02	2016-04-28T00:00:00Z	ftp://ftp.ncbi.nlm.nih.gov/genomes/all/GCA/001/633/185/GCA_001633185.2_ValleyOak3.0	1277008906	2010	68663.8	8982	104436548	97794414	89479036	66423012	57729484	55012092	49020089	176543	71872	32495	1001
11_Fabids	271	Quercus robur	ftp://ftp.ncbi.nlm.nih.gov/genomes/all/GCA/900/291/515/GCA_900291515.1_Q_robur_v1	SAMEA103897756	PRJEB19898	GCA_900291515.1	Scaffold	35.8		OLKR01	2018-03-09T00:00:00Z	ftp://ftp.ncbi.nlm.nih.gov/genomes/all/GCA/900/291/515/GCA_900291515.1_Q_robur_v1	814336181	550	1.48061e+06	50225	115639695	115639695	71345938	70629082	57352617	55068941	51661711	50368918	44977106	1825287	198
11_Fabids	272	Quercus suber	ftp://ftp.ncbi.nlm.nih.gov/genomes/all/GCF/002/906/115/GCF_002906115.1_CorkOak1.0	SAMN07312269	PRJNA433227	GCA_002906115.1	Scaffold	36.5		PKMF01	2018-01-29T00:00:00Z	ftp://ftp.ncbi.nlm.nih.gov/genomes/all/GCA/002/906/115/GCA_002906115.1_CorkOak1.0	953298670	23344	40837	2509	2284287	1224669	896099	721210	580677	465160	365402	274776	170400	44952	1000
11_Fabids	273	Juglans cathayensis	ftp://ftp.ncbi.nlm.nih.gov/genomes/all/GCA/003/122/765/GCA_003122765.1_ASM312276v1	SAMN08795866	PRJNA445704	GCA_003122765.1	Scaffold	0		QEOU01	2018-05-14T00:00:00Z	ftp://ftp.ncbi.nlm.nih.gov/genomes/all/GCA/003/122/765/GCA_003122765.1_ASM312276v1	600151230	19972	30049.6	211	3962547	645166	435009	321897	245494	193887	152492	117693	84266	50722	200
11_Fabids	274	Juglans hindsii	ftp://ftp.ncbi.nlm.nih.gov/genomes/all/GCA/003/123/825/GCA_003123825.1_ASM312382v1	SAMN08795864	PRJNA445704	GCA_003123825.1	Scaffold	34.4		QEOW01	2018-05-14T00:00:00Z	ftp://ftp.ncbi.nlm.nih.gov/genomes/all/GCA/003/123/825/GCA_003123825.1_ASM312382v1	611108796	73433	8321.99	277	3791329	1575659	1064901	825512	645383	487794	376582	267645	153149	36675	200
11_Fabids	275	Juglans mandshurica	ftp://ftp.ncbi.nlm.nih.gov/genomes/all/GCA/002/916/435/GCA_002916435.1_m4v1	SAMN08193750	PRJNA356989	GCA_002916435.1	Scaffold	0		PKSJ01	2018-02-05T00:00:00Z	ftp://ftp.ncbi.nlm.nih.gov/genomes/all/GCA/002/916/435/GCA_002916435.1_m4v1	558070702	13809	40413.6	2402	2580216	1335263	978640	766726	617386	496923	396820	298234	204156	60518	920
11_Fabids	276	Juglans microcarpa	ftp://ftp.ncbi.nlm.nih.gov/genomes/all/GCA/003/123/845/GCA_003123845.1_ASM312384v1	SAMN08795863	PRJNA445704	GCA_003123845.1	Scaffold	34.3		QEOX01	2018-05-14T00:00:00Z	ftp://ftp.ncbi.nlm.nih.gov/genomes/all/GCA/003/123/845/GCA_003123845.1_ASM312384v1	913972398	112570	8119.15	381	1267760	401748	289177	224091	178738	141324	108840	80898	52195	20869	200
11_Fabids	277	Juglans microcarpa x Juglans regia	ftp://ftp.ncbi.nlm.nih.gov/genomes/all/GCA/004/785/585/GCA_004785585.1_JrSerr_v1.0	SAMN09474938	PRJNA413991	GCA_004785585.1	Chromosome	36.1941	chromosome 1D:CM015649.1; chromosome 1S:CM015650.1; chromosome 2D:CM015651.1; chromosome 2S:CM015652.1; chromosome 3D:CM015653.1; chromosome 3S:CM015654.1; chromosome 4D:CM015655.1; chromosome 4S:CM015656.1; chromosome 5D:CM015657.1; chromosome 5S:CM015658.1; chromosome 6D:CM015659.1; chromosome 6S:CM015660.1; chromosome 7D:CM015661.1; chromosome 7S:CM015662.1; chromosome 8D:CM015663.1; chromosom…	QKZY01	2019-04-12T00:00:00Z	ftp://ftp.ncbi.nlm.nih.gov/genomes/all/GCA/004/785/585/GCA_004785585.1_JrSerr_v1.0	534671929	73	7324273	44183	51893103	43955564	38540051	37991167	35878018	35197335	32184663	30027985	29017359	24894769	6036
11_Fabids	278	Juglans nigra	ftp://ftp.ncbi.nlm.nih.gov/genomes/all/GCA/003/123/865/GCA_003123865.1_ASM312386v1	SAMN08795865	PRJNA445704	GCA_003123865.1	Scaffold	34.8		QEOV01	2018-05-14T00:00:00Z	ftp://ftp.ncbi.nlm.nih.gov/genomes/all/GCA/003/123/865/GCA_003123865.1_ASM312386v1	620766650	90472	6861.42	382	1484804	699987	512513	401171	312599	252148	191872	134326	76326	19324	200
11_Fabids	279	Juglans regia	ftp://ftp.ncbi.nlm.nih.gov/genomes/all/GCF/001/411/555/GCF_001411555.1_wgs.5d	SAMN03704235	PRJNA350852	GCA_001411555.1	Scaffold	36.6		LIHL01	2015-10-22T00:00:00Z	ftp://ftp.ncbi.nlm.nih.gov/genomes/all/GCA/001/411/555/GCA_001411555.1_wgs.5d	699672627	105803	6612.98	517	3676996	1768723	1285523	878209	532412	250522	131092	65105	29343	5892	200
11_Fabids	280	Juglans sigillata	ftp://ftp.ncbi.nlm.nih.gov/genomes/all/GCA/003/123/805/GCA_003123805.1_ASM312380v1	SAMN08795862	PRJNA445704	GCA_003123805.1	Scaffold	34.5		QEOY01	2018-05-14T00:00:00Z	ftp://ftp.ncbi.nlm.nih.gov/genomes/all/GCA/003/123/805/GCA_003123805.1_ASM312380v1	648117419	134300	4825.89	402	1548809	645182	453087	349578	273739	207533	153834	101574	53541	3081	200
11_Fabids	281	Pterocarya stenoptera	ftp://ftp.ncbi.nlm.nih.gov/genomes/all/GCA/003/123/785/GCA_003123785.1_ASM312378v1	SAMN08795867	PRJNA445704	GCA_003123785.1	Scaffold	34.4		QEOT01	2018-05-14T00:00:00Z	ftp://ftp.ncbi.nlm.nih.gov/genomes/all/GCA/003/123/785/GCA_003123785.1_ASM312378v1	955600900	124315	7686.93	338	2404645	480174	328354	247943	196341	155468	118983	88266	57210	22610	200
11_Fabids	282	Morella rubra	ftp://ftp.ncbi.nlm.nih.gov/genomes/all/GCA/003/952/965/GCA_003952965.1_Mru_ZJU_1.01	SAMN07510764	PRJNA398601	GCA_003952965.1	Chromosome	37.8335	linkage group LG1:CM012073.1; linkage group LG2:CM012074.1; linkage group LG3:CM012075.1; linkage group LG4:CM012076.1; linkage group LG5:CM012077.1; linkage group LG6:CM012078.1; linkage group LG7:CM012079.1; linkage group LG8:CM012080.1	RXIC01	2018-12-17T00:00:00Z	ftp://ftp.ncbi.nlm.nih.gov/genomes/all/GCA/003/952/965/GCA_003952965.1_Mru_ZJU_1.01	313019583	500	626039	14926	39290921	39290921	39213461	38479969	35912157	35745824	35745824	31573488	31026390	811514	209
11_Fabids	283	Punica granatum	ftp://ftp.ncbi.nlm.nih.gov/genomes/all/GCA/002/201/585/GCA_002201585.1_ASM220158v1	SAMN06227009	PRJNA360679	GCA_002201585.1	Scaffold	38.5		MTKT01	2017-06-20T00:00:00Z	ftp://ftp.ncbi.nlm.nih.gov/genomes/all/GCA/002/201/585/GCA_002201585.1_ASM220158v1	296383220	17405	17028.6	340	9977371	5361119	4215183	3503224	2729200	2303557	1591519	1060083	649342	169940	200
12_Malvids	284	Eucalyptus grandis	ftp://ftp.ncbi.nlm.nih.gov/genomes/all/GCF/000/612/305/GCF_000612305.1_Egrandis1_0	SAMN02230419	PRJNA49047	GCA_000612305.1	Scaffold	39.9993	chloroplast Pltd:NC_014570.1/	AUSX01	2014-04-02T00:00:00Z	ftp://ftp.ncbi.nlm.nih.gov/genomes/all/GCA/000/612/305/GCA_000612305.1_Egrandis1_0	691429809	4951	139655	6193	80079441	80079441	74729908	74329289	64235786	53892272	45509462	41978195	39358841	390999	1005
12_Malvids	285	Eucalyptus melliodora	ftp://ftp.ncbi.nlm.nih.gov/genomes/all/GCA/004/368/105/GCA_004368105.1_ASM436810v1	SAMN10587502	PRJNA509734	GCA_004368105.1	Scaffold	38.9		SISH01	2019-03-25T00:00:00Z	ftp://ftp.ncbi.nlm.nih.gov/genomes/all/GCA/004/368/105/GCA_004368105.1_ASM436810v1	643228284	423	1.52063e+06	339473	32520013	17527582	11430037	9045700	6492954	5279785	3849614	3029337	2236558	1176057	820
12_Malvids	286	Eucalyptus pauciflora	ftp://ftp.ncbi.nlm.nih.gov/genomes/all/GCA/007/663/325/GCA_007663325.1_ASM766332v1	SAMN11842900	PRJNA450887	GCA_007663325.1	Scaffold	39.4		VMYD01	2019-07-30T00:00:00Z	ftp://ftp.ncbi.nlm.nih.gov/genomes/all/GCA/007/663/325/GCA_007663325.1_ASM766332v1	594528099	415	1.4326e+06	715704	12223266	7686996	6103215	4567851	3966997	3234447	2355927	1613994	1189457	623756	2021
12_Malvids	287	Gossypium darwinii	ftp://ftp.ncbi.nlm.nih.gov/genomes/all/GCA/007/990/325/GCA_007990325.1_Gossypium_darwinii_v1.1	SAMN10884649	PRJNA516409	GCA_007990325.1	Chromosome	34.1432	chromosome A01:CM017688.1; chromosome A02:CM017689.1; chromosome A03:CM017690.1; chromosome A04:CM017691.1; chromosome A05:CM017692.1; chromosome A06:CM017693.1; chromosome A07:CM017694.1; chromosome A08:CM017695.1; chromosome A09:CM017696.1; chromosome A10:CM017697.1; chromosome A11:CM017698.1; chromosome A12:CM017699.1; chromosome A13:CM017700.1; chromosome D01:CM017701.1; chromosome D02:CM0177…	VKGI01	2019-08-12T00:00:00Z	ftp://ftp.ncbi.nlm.nih.gov/genomes/all/GCA/007/990/325/GCA_007990325.1_Gossypium_darwinii_v1.1	2182957963	821	6.5358e+06	55785	120009936	119414621	113192719	110366452	105499638	101902339	79385658	66245736	63351384	57165345	7348
12_Malvids	288	Gossypium mustelinum	ftp://ftp.ncbi.nlm.nih.gov/genomes/all/GCA/007/990/455/GCA_007990455.1_Gossypium_mustelinum_v1.1	SAMN11110849	PRJNA525892	GCA_007990455.1	Chromosome	34.506	chromosome A01:CM017636.1; chromosome A02:CM017637.1; chromosome A03:CM017638.1; chromosome A04:CM017639.1; chromosome A05:CM017640.1; chromosome A06:CM017641.1; chromosome A07:CM017642.1; chromosome A08:CM017643.1; chromosome A09:CM017644.1; chromosome A10:CM017645.1; chromosome A11:CM017646.1; chromosome A12:CM017647.1; chromosome A13:CM017648.1; chromosome D01:CM017649.1; chromosome D02:CM0176…	VKGF01	2019-08-12T00:00:00Z	ftp://ftp.ncbi.nlm.nih.gov/genomes/all/GCA/007/990/455/GCA_007990455.1_Gossypium_mustelinum_v1.1	2315094184	2146	6.04463e+06	50397	129182752	126800230	121752893	115677886	113805608	106758837	82652960	69705406	65850227	58050881	8730
12_Malvids	289	Gossypium tomentosum	ftp://ftp.ncbi.nlm.nih.gov/genomes/all/GCA/007/990/485/GCA_007990485.1_Gossypium_tomentosum_v1.1	SAMN11289623	PRJNA516412	GCA_007990485.1	Chromosome	34.218	chromosome A01:CM017610.1; chromosome A02:CM017611.1; chromosome A03:CM017612.1; chromosome A04:CM017613.1; chromosome A05:CM017614.1; chromosome A06:CM017615.1; chromosome A07:CM017616.1; chromosome A08:CM017617.1; chromosome A09:CM017618.1; chromosome A10:CM017619.1; chromosome A11:CM017620.1; chromosome A12:CM017621.1; chromosome A13:CM017622.1; chromosome D01:CM017623.1; chromosome D02:CM0176…	VKGE01	2019-08-12T00:00:00Z	ftp://ftp.ncbi.nlm.nih.gov/genomes/all/GCA/007/990/485/GCA_007990485.1_Gossypium_tomentosum_v1.1	2193557323	749	6.87636e+06	48800	121609178	120496074	114172108	110351505	105044580	102861178	79219835	67500665	63218559	57081155	17415
12_Malvids	290	Gossypium turneri	ftp://ftp.ncbi.nlm.nih.gov/genomes/all/GCA/008/044/935/GCA_008044935.1_ASM804493v1	SAMN10135581	PRJNA493521	GCA_008044935.1	Chromosome	33.2104	chromosome D10_01:CP032571.1; chromosome D10_02:CP032572.1; chromosome D10_03:CP032573.1; chromosome D10_04:CP032574.1; chromosome D10_05:CP032575.1; chromosome D10_06:CP032576.1; chromosome D10_07:CP032577.1; chromosome D10_08:CP032578.1; chromosome D10_09:CP032579.1; chromosome D10_10:CP032580.1; chromosome D10_11:CP032581.1; chromosome D10_12:CP032582.1; chromosome D10_13:CP032583.1		2019-08-21T00:00:00Z	ftp://ftp.ncbi.nlm.nih.gov/genomes/all/GCA/008/044/935/GCA_008044935.1_ASM804493v1	755203240	13	5.80926e+07	60445394	67704245	64909839	63881757	61617684	61073689	60464062	60007698	54556719	53747549	50570303	43702783
12_Malvids	291	Metrosideros polymorpha	ftp://ftp.ncbi.nlm.nih.gov/genomes/all/GCA/001/662/345/GCA_001662345.1_Mpo_1.0	SAMD00044343	PRJDB4221	GCA_001662345.1	Scaffold	38.3		BCNH01	2016-04-28T00:00:00Z		304365553	36376	8367.21	194	15115857	12238210	10012559	8408033	5984466	5051733	3747958	2833985	1871497	788482	83
12_Malvids	292	Rhodamnia argentea	ftp://ftp.ncbi.nlm.nih.gov/genomes/all/GCF/900/635/035/GCF_900635035.1_Rarg10x-PRISCAF	SAMEA5186523	PRJEB30444	GCA_900635035.1	Scaffold	40.9		CAAAGQ01	2019-02-07T07:36:00Z	ftp://ftp.ncbi.nlm.nih.gov/genomes/all/GCA/900/635/035/GCA_900635035.1_Rarg10x-PRISCAF	414815504	15781	26285.8	3272	7626398	3214296	2101169	1562645	1160557	857171	504670	256371	47545	9264	1000
12_Malvids	293	Psidium guajava	ftp://ftp.ncbi.nlm.nih.gov/genomes/all/GCA/002/914/565/GCA_002914565.1_Guava1.0	SAMN07608042	PRJNA401640	GCA_002914565.1	Contig	39.3		NTGF01	2018-02-02T00:00:00Z	ftp://ftp.ncbi.nlm.nih.gov/genomes/all/GCA/002/914/565/GCA_002914565.1_Guava1.0	386852394	4728	81821.6	52086	883366	352349	264555	200414	159100	129242	103006	78401	56098	36294	3287
12_Malvids	294	Syzygium oleosum	ftp://ftp.ncbi.nlm.nih.gov/genomes/all/GCA/900/635/055/GCA_900635055.1_Sole10x-PRISCAF	SAMEA5186524	PRJEB30445	GCA_900635055.1	Scaffold	41.6		CAAAGS01	2019-02-07T07:48:00Z	ftp://ftp.ncbi.nlm.nih.gov/genomes/all/GCA/900/635/055/GCA_900635055.1_Sole10x-PRISCAF	431290611	19039	22653	3584	5886603	4262538	3230992	2214768	1440572	975936	598077	216957	22516	7250	1000
12_Malvids	295	Azadirachta indica	ftp://ftp.ncbi.nlm.nih.gov/genomes/all/GCA/000/439/995/GCA_000439995.3_AzaInd2.1	SAMN02715695	PRJNA176672	GCA_000439995.3	Contig	43.2		AMWY02	2013-07-25T00:00:00Z	ftp://ftp.ncbi.nlm.nih.gov/genomes/all/GCA/000/439/995/GCA_000439995.3_AzaInd2.1	261457759	126142	2072.73	1211	47608	11989	8487	6250	4675	3491	2628	1938	1395	921	200
12_Malvids	296	Atalantia buxifolia	ftp://ftp.ncbi.nlm.nih.gov/genomes/all/GCA/002/013/935/GCA_002013935.1_ASM201393v1	SAMN05770693	PRJNA327148	GCA_002013935.1	Scaffold	30.7		MKYR01	2017-03-03T00:00:00Z	ftp://ftp.ncbi.nlm.nih.gov/genomes/all/GCA/002/013/935/GCA_002013935.1_ASM201393v1	315806082	25600	12336.2	506	7163423	5001191	2705556	2126676	1478898	1073988	835132	510870	273648	32003	300
12_Malvids	297	Citrus cavaleriei	ftp://ftp.ncbi.nlm.nih.gov/genomes/all/GCA/002/013/975/GCA_002013975.2_ASM201397v2	SAMN05519344	PRJNA321657	GCA_002013975.2	Scaffold	32.1		MKYP02	2017-03-03T00:00:00Z	ftp://ftp.ncbi.nlm.nih.gov/genomes/all/GCA/002/013/975/GCA_002013975.2_ASM201397v2	357621245	14916	23975.7	665	2984400	1562145	1204469	865296	634579	501435	374543	263803	157277	46223	300
12_Malvids	298	Citrus clementina	ftp://ftp.ncbi.nlm.nih.gov/genomes/all/GCF/000/493/195/GCF_000493195.1_Citrus_clementina_v1.0	SAMN02389527	PRJNA223006	GCA_000493195.1	Scaffold	35.2		AMZM01	2013-10-30T00:00:00Z	ftp://ftp.ncbi.nlm.nih.gov/genomes/all/GCA/000/493/195/GCA_000493195.1_Citrus_clementina_v1.0	301364702	1398	215568	4772	51047765	51047765	43299053	43299053	36375926	31410901	28940139	25649276	25613772	21133251	1011
12_Malvids	299	Citrus hindsii	ftp://ftp.ncbi.nlm.nih.gov/genomes/all/GCA/004/802/465/GCA_004802465.1_ASM480246v1	SAMN09874947	PRJNA487160	GCA_004802465.1	Contig	34.5		QWBT01	2019-04-22T00:00:00Z	ftp://ftp.ncbi.nlm.nih.gov/genomes/all/GCA/004/802/465/GCA_004802465.1_ASM480246v1	373170204	1331	280368	54441	11998049	7464366	5336869	4136270	3388019	2206231	1334872	895162	342013	73384	201
12_Malvids	300	Citrus maxima	ftp://ftp.ncbi.nlm.nih.gov/genomes/all/GCA/002/006/925/GCA_002006925.1_ASM200692v1	SAMN04901528	PRJNA318855	GCA_002006925.1	Chromosome	34.9872	chromosome 1:CM007748.1; chromosome 2:CM007749.1; chromosome 3:CM007750.1; chromosome 4:CM007751.1; chromosome 5:CM007752.1; chromosome 6:CM007753.1; chromosome 7:CM007754.1; chromosome 8:CM007755.1; chromosome 9:CM007756.1	MKYQ01	2017-02-24T00:00:00Z	ftp://ftp.ncbi.nlm.nih.gov/genomes/all/GCA/002/006/925/GCA_002006925.1_ASM200692v1	345757338	1612	229892	3464	53008150	53008150	49531769	40397281	40397281	32082701	29346085	23636167	22269817	1156239	1000
12_Malvids	301	Citrus medica	ftp://ftp.ncbi.nlm.nih.gov/genomes/all/GCA/002/013/955/GCA_002013955.2_C_medica_denovo_2	SAMN04914485	PRJNA320023	GCA_002013955.2	Scaffold	0		MKYO02	2017-03-03T00:00:00Z	ftp://ftp.ncbi.nlm.nih.gov/genomes/all/GCA/002/013/955/GCA_002013955.2_C_medica_denovo_2	406057947	32732	12405.5	550	2443612	1093032	790404	604974	480769	369527	271380	180128	77457	16592	300
12_Malvids	302	Citrus reticulata	ftp://ftp.ncbi.nlm.nih.gov/genomes/all/GCA/003/258/625/GCA_003258625.1_ASM325862v1	SAMN07176221	PRJNA388397	GCA_003258625.1	Scaffold	33.9		NIHA01	2018-06-20T00:00:00Z	ftp://ftp.ncbi.nlm.nih.gov/genomes/all/GCA/003/258/625/GCA_003258625.1_ASM325862v1	344273335	67725	5083.4	589	7195442	4447546	3055988	2403776	1851871	1288159	859493	512473	106888	1247	201
12_Malvids	303	Citrus sinensis	ftp://ftp.ncbi.nlm.nih.gov/genomes/all/GCF/000/317/415/GCF_000317415.1_Csi_valencia_1.0	SAMN02981414	PRJNA225998	GCA_000317415.1	Chromosome	35.3314	chromosome 1:NC_023046.1/CM001701.1; chromosome 2:NC_023047.1/CM001702.1; chromosome 3:NC_023048.1/CM001703.1; chromosome 4:NC_023049.1/CM001704.1; chromosome 5:NC_023050.1/CM001705.1; chromosome 6:NC_023051.1/CM001706.1; chromosome 7:NC_023052.1/CM001707.1; chromosome 8:NC_023053.1/CM001708.1; chromosome 9:NC_023054.1/CM001709.1; chloroplast Pltd:NC_008334.1/	AJPS01	2012-09-18T00:00:00Z	ftp://ftp.ncbi.nlm.nih.gov/genomes/all/GCA/000/317/415/GCA_000317415.1_Csi_valencia_1.0	327829540	4995	67677.4	754	36147563	36147563	32205869	30838379	28715784	22711823	21175815	18450785	1065981	340507	206
12_Malvids	304	Citrus unshiu	ftp://ftp.ncbi.nlm.nih.gov/genomes/all/GCA/002/897/195/GCA_002897195.1_CUMW_v1.0	SAMD00083908	PRJDB5882	GCA_002897195.1	Scaffold	31.3		BDQV01	2017-12-06T00:00:00Z	ftp://ftp.ncbi.nlm.nih.gov/genomes/all/GCA/002/897/195/GCA_002897195.1_CUMW_v1.0	359652061	20876	17228	1003	5227725	2402814	1210457	779047	556536	386404	266024	162173	78312	14195	500
12_Malvids	305	Citrus x paradisi x Citrus trifoliata	ftp://ftp.ncbi.nlm.nih.gov/genomes/all/GCA/001/929/425/GCA_001929425.1_WD23_11_assembly_v1	SAMN02393795	PRJNA224728	GCA_001929425.1	Contig	34.4		AZHM01	2017-01-03T00:00:00Z	ftp://ftp.ncbi.nlm.nih.gov/genomes/all/GCA/001/929/425/GCA_001929425.1_WD23_11_assembly_v1	265533993	238488	1113.41	552	233936	7139	4995	3721	2793	2091	1536	1083	697	419	200
12_Malvids	306	Acer yangbiense	ftp://ftp.ncbi.nlm.nih.gov/genomes/all/GCA/008/009/225/GCA_008009225.1_AYv1.1	SAMN11026391	PRJNA524417	GCA_008009225.1	Chromosome	35.9704	chromosome 1:CM017761.1; chromosome 2:CM017762.1; chromosome 3:CM017763.1; chromosome 4:CM017764.1; chromosome 5:CM017765.1; chromosome 6:CM017766.1; chromosome 7:CM017767.1; chromosome 8:CM017768.1; chromosome 9:CM017769.1; chromosome 10:CM017770.1; chromosome 11:CM017771.1; chromosome 12:CM017772.1; chromosome 13:CM017773.1; mitochondrion MT:CM017774.1; chloroplast Pltd:CM017775.1	VAHF01	2019-08-19T00:00:00Z	ftp://ftp.ncbi.nlm.nih.gov/genomes/all/GCA/008/009/225/GCA_008009225.1_AYv1.1	665887899	280	2.37817e+06	50985	73781861	73781861	69317922	63125055	50469021	44917698	44892694	44176199	42843101	36383401	7640
12_Malvids	307	Xanthoceras sorbifolium	ftp://ftp.ncbi.nlm.nih.gov/genomes/all/GCA/003/430/845/GCA_003430845.1_ASM343084v1	SAMN09748200	PRJNA483857	GCA_003430845.1	Chromosome	34.9864	linkage group LG1:CM010608.1; linkage group LG10:CM010609.1; linkage group LG11:CM010610.1; linkage group LG12:CM010611.1; linkage group LG13:CM010612.1; linkage group LG14:CM010613.1; linkage group LG15:CM010614.1; linkage group LG2:CM010615.1; linkage group LG3:CM010616.1; linkage group LG4:CM010617.1; linkage group LG5:CM010618.1; linkage group LG6:CM010619.1; linkage group LG7:CM010620.1; lin…	QUWJ01	2018-08-28T00:00:00Z	ftp://ftp.ncbi.nlm.nih.gov/genomes/all/GCA/003/430/845/GCA_003430845.1_ASM343084v1	504383062	2297	219583	6528	40097451	39341037	35738308	34590148	34015926	32173403	30062096	28934939	28800770	25069408	203
12_Malvids	308	Herrania umbratica	ftp://ftp.ncbi.nlm.nih.gov/genomes/all/GCF/002/168/275/GCF_002168275.1_ASM216827v2	SAMN06806157	PRJNA389730	GCA_002168275.2	Scaffold	33.9		NHTG01	2017-06-05T00:00:00Z	ftp://ftp.ncbi.nlm.nih.gov/genomes/all/GCA/002/168/275/GCA_002168275.2_ASM216827v2	234039246	6074	38531.3	2012	15579451	14367614	12062019	10737078	9139585	8132550	6982396	4184555	2022356	39197	728
12_Malvids	309	Corchorus capsularis	ftp://ftp.ncbi.nlm.nih.gov/genomes/all/GCA/001/974/805/GCA_001974805.1_CCACVL1_1.0	SAMN03290679	PRJNA215142	GCA_001974805.1	Scaffold	35.2		AWWV01	2017-01-30T00:00:00Z	ftp://ftp.ncbi.nlm.nih.gov/genomes/all/GCA/001/974/805/GCA_001974805.1_CCACVL1_1.0	317178409	16522	19197.3	7960	342011	121008	89990	71232	57421	46451	36474	28020	19900	10948	561
12_Malvids	310	Corchorus olitorius	ftp://ftp.ncbi.nlm.nih.gov/genomes/all/GCA/001/974/825/GCA_001974825.1_COLO4_1.0	SAMN03160584	PRJNA215141	GCA_001974825.1	Contig	35.5		AWUE01	2017-01-30T00:00:00Z	ftp://ftp.ncbi.nlm.nih.gov/genomes/all/GCA/001/974/825/GCA_001974825.1_COLO4_1.0	334911943	24918	13440.6	2855	363252	132496	95603	72717	57646	44998	34586	24594	15653	6577	339
12_Malvids	311	Durio zibethinus	ftp://ftp.ncbi.nlm.nih.gov/genomes/all/GCF/002/303/985/GCF_002303985.1_Duzib1.0	SAMN07563003	PRJNA407962	GCA_002303985.1	Scaffold	32.7		NSDW01	2017-09-15T00:00:00Z	ftp://ftp.ncbi.nlm.nih.gov/genomes/all/GCA/002/303/985/GCA_002303985.1_Duzib1.0	715230256	677	1.05647e+06	33747	36299135	35885061	27802247	26282861	24162007	22724830	22157061	19866354	18142777	15507587	1446
12_Malvids	312	Gossypioides kirkii	ftp://ftp.ncbi.nlm.nih.gov/genomes/all/GCA/002/818/315/GCA_002818315.1_Gokir.v1	SAMN07842098	PRJNA400144	GCA_002818315.1	Chromosome	33.2725	chromosome 1:CM008980.1; chromosome 2:CM008981.1; chromosome 3:CM008982.1; chromosome 4:CM008983.1; chromosome 5:CM008984.1; chromosome 6:CM008985.1; chromosome 7:CM008986.1; chromosome 8:CM008987.1; chromosome 9:CM008988.1; chromosome 10:CM008989.1; chromosome 11:CM008990.1; chromosome 12:CM008991.1	PEQG01	2017-12-06T00:00:00Z	ftp://ftp.ncbi.nlm.nih.gov/genomes/all/GCA/002/818/315/GCA_002818315.1_Gokir.v1	528714955	745	709684	11280	58731782	58731782	52648198	50316312	41945466	41165770	40234664	38671173	38027731	37043456	236
12_Malvids	313	Gossypium arboreum	ftp://ftp.ncbi.nlm.nih.gov/genomes/all/GCF/000/612/285/GCF_000612285.1_Gossypium_arboreum_v1.0	SAMN02981570	PRJNA335838	GCA_000612285.2	Chromosome	36.1993	chromosome 1:NC_030664.1/CM002679.1; chromosome 2:NC_030665.1/CM002680.1; chromosome 3:NC_030666.1/CM002681.1; chromosome 4:NC_030667.1/CM002682.1; chromosome 5:NC_030668.1/CM002683.1; chromosome 6:NC_030669.1/CM002684.1; chromosome 7:NC_030670.1/CM002685.1; chromosome 8:NC_030671.1/CM002686.1; chromosome 9:NC_030672.1/CM002687.1; chromosome 10:NC_030673.1/CM002688.1; chromosome 11:NC_030674.1/CM…	AYOE01	2014-03-31T00:00:00Z	ftp://ftp.ncbi.nlm.nih.gov/genomes/all/GCA/000/612/285/GCA_000612285.2_Gossypium_arboreum_v1.0	1694597732	75419	22469.1	285	147124936	146008498	144148110	137675496	127721098	121339338	114683840	102937913	101023042	59691364	200
12_Malvids	314	Gossypium barbadense	ftp://ftp.ncbi.nlm.nih.gov/genomes/all/GCA/001/856/525/GCA_001856525.1_GbV1.0	SAMN03433309	PRJNA219156	GCA_001856525.1	Scaffold	35.8		AXCG01	2016-10-28T00:00:00Z	ftp://ftp.ncbi.nlm.nih.gov/genomes/all/GCA/001/856/525/GCA_001856525.1_GbV1.0	2566742836	29751	86274.2	17882	2152292	618787	478756	390481	322003	259869	211608	165158	119443	69915	461
12_Malvids	315	Gossypium hirsutum	ftp://ftp.ncbi.nlm.nih.gov/genomes/all/GCF/000/987/745/GCF_000987745.1_ASM98774v1	SAMN03342414	PRJNA320881	GCA_000987745.1	Chromosome	34.9006	chromosome 1:NC_030074.1/CM003250.1; chromosome 2:NC_030075.1/CM003251.1; chromosome 3:NC_030076.1/CM003252.1; chromosome 4:NC_030077.1/CM003253.1; chromosome 5:NC_030078.1/CM003254.1; chromosome 6:NC_030079.1/CM003255.1; chromosome 7:NC_030080.1/CM003256.1; chromosome 8:NC_030081.1/CM003257.1; chromosome 9:NC_030082.1/CM003258.1; chromosome 10:NC_030083.1/CM003259.1; chromosome 11:NC_030084.1/CM…	LBLM01	2015-04-29T00:00:00Z	ftp://ftp.ncbi.nlm.nih.gov/genomes/all/GCA/000/987/745/GCA_000987745.1_ASM98774v1	2189140010	9148	239303	5203	117247901	106994729	100353538	92291805	91128445	70911690	61129363	55877068	39386523	558740	1004
12_Malvids	316	Gossypium raimondii	ftp://ftp.ncbi.nlm.nih.gov/genomes/all/GCF/000/327/365/GCF_000327365.1_Graimondii2_0	SAMN02743920	PRJNA282644	GCA_000327365.1	Chromosome	33.5284	chromosome 1:NC_026929.1/CM001740.1; chromosome 2:NC_026930.1/CM001741.1; chromosome 3:NC_026931.1/CM001742.1; chromosome 4:NC_026932.1/CM001743.1; chromosome 5:NC_026933.1/CM001744.1; chromosome 6:NC_026934.1/CM001745.1; chromosome 7:NC_026935.1/CM001746.1; chromosome 8:NC_026936.1/CM001747.1; chromosome 9:NC_026937.1/CM001748.1; chromosome 10:NC_026938.1/CM001749.1; chromosome 11:NC_026939.1/CM…	ALYE01	2012-12-20T00:00:00Z	ftp://ftp.ncbi.nlm.nih.gov/genomes/all/GCA/000/327/365/GCA_000327365.1_Graimondii2_0	761565430	1034	736524	6763	70713020	64140413	62769430	62681010	62178258	62175169	58321163	57128820	55868233	45765648	1001
12_Malvids	317	Gossypium thurberi	ftp://ftp.ncbi.nlm.nih.gov/genomes/all/GCA/004/027/125/GCA_004027125.1_Gothu_v1	SAMN09928035	PRJNA488266	GCA_004027125.1	Chromosome	34.2402	chromosome 1:CM013378.1; chromosome 2:CM013379.1; chromosome 3:CM013380.1; chromosome 4:CM013381.1; chromosome 5:CM013382.1; chromosome 6:CM013383.1; chromosome 7:CM013384.1; chromosome 8:CM013385.1; chromosome 9:CM013386.1; chromosome 10:CM013387.1; chromosome 11:CM013388.1; chromosome 12:CM013389.1; chromosome 13:CM013390.1	RCOT01	2018-12-28T00:00:00Z	ftp://ftp.ncbi.nlm.nih.gov/genomes/all/GCA/004/027/125/GCA_004027125.1_Gothu_v1	582006748	15297	38047.1	3408	47599429	43291192	42203216	41035461	40620803	40416325	37623234	37417161	29373247	13137	902
12_Malvids	318	Hibiscus syriacus	ftp://ftp.ncbi.nlm.nih.gov/genomes/all/GCA/001/696/755/GCA_001696755.1_ASM169675v1	SAMN04961617	PRJNA320964	GCA_001696755.1	Scaffold	0		MBGJ01	2016-07-29T00:00:00Z	ftp://ftp.ncbi.nlm.nih.gov/genomes/all/GCA/001/696/755/GCA_001696755.1_ASM169675v1	1748252795	77488	22561.6	845	1541094	401166	290296	222608	174666	139874	110375	82929	57817	30424	500
12_Malvids	319	Kokia drynarioides	ftp://ftp.ncbi.nlm.nih.gov/genomes/all/GCA/002/814/295/GCA_002814295.1_KokDry1	SAMN07559306	PRJNA400144	GCA_002814295.1	Scaffold	33		NTFQ01	2017-12-08T00:00:00Z	ftp://ftp.ncbi.nlm.nih.gov/genomes/all/GCA/002/814/295/GCA_002814295.1_KokDry1	517429527	15383	33636.4	4600	2291099	618428	425449	310627	239922	177976	126177	85743	50464	19398	1000
12_Malvids	320	Aquilaria agallochum	ftp://ftp.ncbi.nlm.nih.gov/genomes/all/GCA/000/696/445/GCA_000696445.1_Aquilaria_agallocha_v1	SAMN02677707	PRJNA240626	GCA_000696445.1	Scaffold	37.5		JMHV01	2014-05-29T00:00:00Z	ftp://ftp.ncbi.nlm.nih.gov/genomes/all/GCA/000/696/445/GCA_000696445.1_Aquilaria_agallocha_v1	726710453	27769	26169.8	2835	1711714	501682	337067	242856	174729	128399	91593	63687	39176	18000	800
12_Malvids	321	Aquilaria sinensis	ftp://ftp.ncbi.nlm.nih.gov/genomes/all/GCA/005/392/925/GCA_005392925.1_SCBG_Asin_1.0	SAMN11080769	PRJNA525935	GCA_005392925.1	Contig	37.8		SMDT01	2019-05-15T00:00:00Z	ftp://ftp.ncbi.nlm.nih.gov/genomes/all/GCA/005/392/925/GCA_005392925.1_SCBG_Asin_1.0	699794123	3368	207777	138815	1777979	853577	637834	497250	405514	323621	254324	197675	148519	98590	5543
12_Malvids	322	Aethionema arabicum	ftp://ftp.ncbi.nlm.nih.gov/genomes/all/GCA/000/411/095/GCA_000411095.1_VEGI_AA_v_1.0	SAMN02169162	PRJNA202984	GCA_000411095.1	Scaffold	36.2		ASZG01	2013-06-12T00:00:00Z	ftp://ftp.ncbi.nlm.nih.gov/genomes/all/GCA/000/411/095/GCA_000411095.1_VEGI_AA_v_1.0	192487774	18312	10511.6	933	1494055	736751	433012	293151	197883	123806	75999	42854	22371	7914	201
12_Malvids	323	Arabis alpina	ftp://ftp.ncbi.nlm.nih.gov/genomes/all/GCA/900/128/785/GCA_900128785.1_MPIPZ.v5	SAMEA4527704	PRJEB16743	GCA_900128785.1	Chromosome	37.401	chromosome 1:LT669788.1; chromosome 2:LT669789.1; chromosome 3:LT669790.1; chromosome 4:LT669791.1; chromosome 5:LT669792.1; chromosome 6:LT669793.1; chromosome 7:LT669794.1; chromosome 8:LT669795.1		2016-12-31T00:00:00Z	ftp://ftp.ncbi.nlm.nih.gov/genomes/all/GCA/900/128/785/GCA_900128785.1_MPIPZ.v5	311642060	8	3.89553e+07	33388210	52758100	52758100	50579949	50579949	49795044	36598175	36598175	33388210	30422129	29724344	28376109
12_Malvids	324	Arabis nordmanniana	ftp://ftp.ncbi.nlm.nih.gov/genomes/all/GCA/001/484/925/GCA_001484925.1_ASM148492v1	SAMN02983203	PRJNA258061	GCA_001484925.1	Scaffold	35		LNCG01	2016-01-04T00:00:00Z	ftp://ftp.ncbi.nlm.nih.gov/genomes/all/GCA/001/484/925/GCA_001484925.1_ASM148492v1	342306570	267228	1280.95	363	476466	17467	11960	8913	6731	4973	3446	1978	661	346	155
12_Malvids	325	Aurinia saxatilis	ftp://ftp.ncbi.nlm.nih.gov/genomes/all/GCA/900/406/295/GCA_900406295.1_Alyssum_saxatile	SAMEA4640837	PRJEB26555	GCA_900406295.1	Scaffold	36.6		OVAP01	2019-06-13T00:00:00Z	ftp://ftp.ncbi.nlm.nih.gov/genomes/all/GCA/900/406/295/GCA_900406295.1_Alyssum_saxatile	316420398	76972	4110.85	1788	142145	30554	21114	15965	12310	9517	7197	5174	3386	1818	200
12_Malvids	326	Odontarrhena argentea	ftp://ftp.ncbi.nlm.nih.gov/genomes/all/GCA/900/406/245/GCA_900406245.1_Illumina_short-read_assembly_of_Alyssum_argenteum	SAMEA4639485	PRJEB26555	GCA_900406245.1	Scaffold	35.1		OVAF01	2019-06-13T00:00:00Z	ftp://ftp.ncbi.nlm.nih.gov/genomes/all/GCA/900/406/245/GCA_900406245.1_Illumina_short-read_assembly_of_Alyssum_argenteum	183186458	32097	5707.28	2511	1129991	61212	37167	25156	17922	12975	9298	6629	4486	2524	200
12_Malvids	327	Anastatica hierochuntica	ftp://ftp.ncbi.nlm.nih.gov/genomes/all/GCA/900/406/275/GCA_900406275.1_ASM90040627v1	SAMEA4640838	PRJEB26555	GCA_900406275.1	Scaffold	37.4		OVAN01	2019-06-13T00:00:00Z	ftp://ftp.ncbi.nlm.nih.gov/genomes/all/GCA/900/406/275/GCA_900406275.1_ASM90040627v1	542343195	72649	7465.25	3129	329850	51092	35959	27947	22407	17897	14098	10578	7271	3959	200
12_Malvids	328	Biscutella auriculata	ftp://ftp.ncbi.nlm.nih.gov/genomes/all/GCA/900/406/285/GCA_900406285.1_ASM90040628v1	SAMEA4640839	PRJEB26555	GCA_900406285.1	Scaffold	33.9		OVAO01	2019-06-13T00:00:00Z	ftp://ftp.ncbi.nlm.nih.gov/genomes/all/GCA/900/406/285/GCA_900406285.1_ASM90040628v1	384769842	150640	2554.23	1538	86183	13609	9388	7053	5499	4340	3367	2552	1841	1160	200
12_Malvids	329	Biscutella laevigata	ftp://ftp.ncbi.nlm.nih.gov/genomes/all/GCA/900/406/315/GCA_900406315.1_Biscutella_longifolia	SAMEA4643376	PRJEB26555	GCA_900406315.1	Scaffold	35		OVAU01	2019-06-13T00:00:00Z		333609385	144912	2302.15	1179	64737	13978	9939	7588	5909	4587	3475	2518	1700	981	200
12_Malvids	330	Boechera puberula	ftp://ftp.ncbi.nlm.nih.gov/genomes/all/GCA/900/406/335/GCA_900406335.1_ASM90040633v1	SAMEA4640840	PRJEB26555	GCA_900406335.1	Scaffold	34.9		OVAS01	2019-06-13T00:00:00Z	ftp://ftp.ncbi.nlm.nih.gov/genomes/all/GCA/900/406/335/GCA_900406335.1_ASM90040633v1	182592028	123951	1473.1	906	59303	7597	5278	3948	3019	2321	1788	1360	988	644	200
12_Malvids	331	Boechera stricta	ftp://ftp.ncbi.nlm.nih.gov/genomes/all/GCA/002/079/875/GCA_002079875.1_Bstricta_278_v1	SAMN04884537	PRJNA319286	GCA_002079875.1	Scaffold	30.9		MLHT01	2017-04-05T00:00:00Z	ftp://ftp.ncbi.nlm.nih.gov/genomes/all/GCA/002/079/875/GCA_002079875.1_Bstricta_278_v1	188794588	1944	97116.6	1886	8348134	5651650	3726791	3140938	2817113	2187891	1640546	1253100	801408	344773	1000
12_Malvids	332	Schrenkiella parvula	ftp://ftp.ncbi.nlm.nih.gov/genomes/all/GCA/000/218/505/GCA_000218505.1_Eutrema_parvulum_v01	SAMN00139339	PRJNA63667	GCA_000218505.1	Chromosome	35.7366	chromosome 1:CM001187.1; chromosome 2:CM001188.1; chromosome 3:CM001189.1; chromosome 4:CM001190.1; chromosome 5:CM001191.1; chromosome 6:CM001192.1; chromosome 7:CM001193.1	AFAN01	2011-03-25T00:00:00Z	ftp://ftp.ncbi.nlm.nih.gov/genomes/all/GCA/000/218/505/GCA_000218505.1_Eutrema_parvulum_v01	137073209	1463	94079.1	5422	19836964	19836964	18523719	17055980	17055980	16150104	15215380	14320061	13294645	53201	1008
12_Malvids	333	Brassica cretica	ftp://ftp.ncbi.nlm.nih.gov/genomes/all/GCA/003/260/655/GCA_003260655.1_B_cretica_A_v2	SAMN09112366	PRJNA470925	GCA_003260655.1	Contig	36		QGKV01	2018-06-22T00:00:00Z	ftp://ftp.ncbi.nlm.nih.gov/genomes/all/GCA/003/260/655/GCA_003260655.1_B_cretica_A_v2	412521210	243461	1694.4	885	40799	10053	7029	5209	3879	2820	1970	1337	916	658	500
12_Malvids	334	Brassica juncea	ftp://ftp.ncbi.nlm.nih.gov/genomes/all/GCA/001/687/265/GCA_001687265.1_Brassica_juncea_var_tumida_T84-66_v1	SAMN03741772	PRJNA285130	GCA_001687265.1	Chromosome	37.3429	chromosome A1:CM007185.1; chromosome A2:CM007186.1; chromosome A3:CM007187.1; chromosome A4:CM007188.1; chromosome A5:CM007189.1; chromosome A6:CM007190.1; chromosome A7:CM007191.1; chromosome A8:CM007192.1; chromosome A9:CM007193.1; chromosome A10:CM007194.1; chromosome B1:CM007195.1; chromosome B2:CM007196.1; chromosome B3:CM007197.1; chromosome B4:CM007198.1; chromosome B5:CM007199.1; chromoso…	LFQT01	2016-07-19T00:00:00Z		954861368	9746	97974.7	2807	83567108	77673080	62778564	50573455	44223734	38841276	33175494	28547970	4321309	144127	1000
12_Malvids	335	Brassica napus	ftp://ftp.ncbi.nlm.nih.gov/genomes/all/GCF/000/686/985/GCF_000686985.2_Bra_napus_v2.0	SAMN02742820	PRJNA293435	GCA_000686985.2	Chromosome	37.4074	chromosome A1:NC_027757.2/CM002759.2; chromosome A2:NC_027758.2/CM002760.2; chromosome A3:NC_027759.2/CM002761.2; chromosome A4:NC_027760.2/CM002762.2; chromosome A5:NC_027761.2/CM002763.2; chromosome A6:NC_027762.2/CM002764.2; chromosome A7:NC_027763.2/CM002765.2; chromosome A8:NC_027764.2/CM002766.2; chromosome A9:NC_027765.2/CM002767.2; chromosome A10:NC_027766.2/CM002768.2; chromosome C1:NC_0…	JMKK02	2014-05-05T00:00:00Z	ftp://ftp.ncbi.nlm.nih.gov/genomes/all/GCA/000/686/985/GCA_000686985.2_Bra_napus_v2.0	976190593	1471	663624	36700	80379029	70552672	68396429	51699379	49139117	45943547	44144641	35822559	27741901	485073	723
12_Malvids	336	Brassica nigra	ftp://ftp.ncbi.nlm.nih.gov/genomes/all/GCA/001/682/895/GCA_001682895.1_ASM168289v1	SAMN03742614	PRJNA285130	GCA_001682895.1	Chromosome	36.3207	chromosome B1:CM004491.1; chromosome B2:CM004492.1; chromosome B3:CM004493.1; chromosome B4:CM004494.1; chromosome B5:CM004495.1; chromosome B6:CM004496.1; chromosome B7:CM004497.1; chromosome B8:CM004498.1	LFLV01	2016-07-10T00:00:00Z	ftp://ftp.ncbi.nlm.nih.gov/genomes/all/GCA/001/682/895/GCA_001682895.1_ASM168289v1	402144823	2545	158014	4139	44809562	44809562	44396707	44367670	41685129	39062406	32756842	30920229	1387316	171572	365
12_Malvids	337	Brassica oleracea	ftp://ftp.ncbi.nlm.nih.gov/genomes/all/GCF/000/695/525/GCF_000695525.1_BOL	SAMN02584321	PRJNA293438	GCA_000695525.1	Chromosome	37.3348	chromosome C1:NC_027748.1/CM002784.1; chromosome C2:NC_027749.1/CM002785.1; chromosome C3:NC_027750.1/CM002786.1; chromosome C4:NC_027751.1/CM002787.1; chromosome C5:NC_027752.1/CM002788.1; chromosome C6:NC_027753.1/CM002789.1; chromosome C7:NC_027754.1/CM002790.1; chromosome C8:NC_027755.1/CM002791.1; chromosome C9:NC_027756.1/CM002792.1; mitochondrion:NC_016118.1/	JJMF01	2014-05-22T00:00:00Z	ftp://ftp.ncbi.nlm.nih.gov/genomes/all/GCF/000/695/525/GCF_000695525.1_BOL	488954160	32886	14868.2	393	64984695	64984695	54679868	53719093	52886895	48366697	46902585	43764888	41758685	39822476	200
12_Malvids	338	Brassica rapa	ftp://ftp.ncbi.nlm.nih.gov/genomes/all/GCF/000/309/985/GCF_000309985.1_Brapa_1.0	SAMN02981293	PRJNA59981	GCA_000309985.1	Chromosome	35.826	chromosome A1:NC_024795.1/; chromosome A2:NC_024796.1/; chromosome A3:NC_024797.1/; chromosome A4:NC_024798.1/; chromosome A5:NC_024799.1/; chromosome A6:NC_024800.1/; chromosome A7:NC_024801.1/; chromosome A8:NC_024802.1/; chromosome A9:NC_024803.1/; chromosome A10:NC_024804.1/; chloroplast Pltd:NC_015139.1/	AENI01	2011-07-14T00:00:00Z	ftp://ftp.ncbi.nlm.nih.gov/genomes/all/GCA/000/309/985/GCA_000309985.1_Brapa_1.0	284129391	40432	7059.29	140	37155481	37155481	31725688	28635137	27864329	26286742	23960834	21613650	18984343	17599535	100
12_Malvids	339	Erucastrum elatum	ftp://ftp.ncbi.nlm.nih.gov/genomes/all/GCA/900/406/325/GCA_900406325.1_ASM90040632v1	SAMEA4640843	PRJEB26555	GCA_900406325.1	Scaffold	34.6		OVBX01	2019-06-13T00:00:00Z	ftp://ftp.ncbi.nlm.nih.gov/genomes/all/GCA/900/406/325/GCA_900406325.1_ASM90040632v1	362114105	80289	4510.13	2349	141086	34356	22063	15414	11473	8745	6661	4947	3444	2046	200
12_Malvids	340	Raphanus raphanistrum	ftp://ftp.ncbi.nlm.nih.gov/genomes/all/GCA/000/769/845/GCA_000769845.1_ASM76984v1	SAMN02213662	PRJNA209513	GCA_000769845.1	Contig	35		JRQH01	2014-10-28T00:00:00Z		253833977	64732	3921.31	1307	120426	32011	22588	17178	13259	10186	7672	5510	3521	1576	200
12_Malvids	341	Raphanus sativus	ftp://ftp.ncbi.nlm.nih.gov/genomes/all/GCF/000/801/105/GCF_000801105.1_Rs1.0	SAMN03084390	PRJNA344915	GCA_000801105.2	Scaffold	37.2045	mitochondrion MT:NC_018551.1/; chloroplast Pltd:NC_024469.1/	JRUI02	2014-12-12T00:00:00Z	ftp://ftp.ncbi.nlm.nih.gov/genomes/all/GCA/000/801/105/GCA_000801105.2_Rs1.0	426614037	10676	39960.1	3332	53636577	53636577	50002108	45943323	43799612	38354807	29681327	27187321	26309735	17197	1597
12_Malvids	342	Arabidopsis halleri	ftp://ftp.ncbi.nlm.nih.gov/genomes/all/GCA/900/078/215/GCA_900078215.1_Ahal2.2	SAMEA3885198	PRJEB12914	GCA_900078215.1	Scaffold	30.7		FJVB01	2016-09-29T00:00:00Z		196243198	2239	87647.7	4624	4302264	2307619	1795981	1297036	941622	712249	540348	431758	260373	94752	932
12_Malvids	343	Arabidopsis lyrata	ftp://ftp.ncbi.nlm.nih.gov/genomes/all/GCF/000/004/255/GCF_000004255.2_v.1.0	SAMN02981250	PRJNA41137	GCA_000004255.1	Scaffold	37.5991	chloroplast Pltd:NC_034379.1/	ADBK01	2009-11-30T00:00:00Z	ftp://ftp.ncbi.nlm.nih.gov/genomes/all/GCF/000/004/255/GCF_000004255.2_v.1.0	206822858	696	297159	7009	33132539	33132539	25113588	24649197	24649197	24464547	23328337	22951293	21221946	19320864	1005
12_Malvids	344	Arabidopsis thaliana	ftp://ftp.ncbi.nlm.nih.gov/genomes/all/GCF/000/001/735/GCF_000001735.4_TAIR10.1	SAMN03081427	PRJNA10719	GCA_000001735.2	Chromosome	36.0529	chromosome 1:NC_003070.9/CP002684.1; chromosome 2:NC_003071.7/CP002685.1; chromosome 3:NC_003074.8/CP002686.1; chromosome 4:NC_003075.7/CP002687.1; chromosome 5:NC_003076.8/CP002688.1; mitochondrion MT:NC_037304.1/BK010421.1; chloroplast Pltd:NC_000932.1/AP000423.1		2001-08-13T00:00:00Z	ftp://ftp.ncbi.nlm.nih.gov/genomes/all/GCA/000/001/735/GCA_000001735.2_TAIR10.1	119668634	7	1.70955e+07	19698289	30427671	30427671	30427671	26975502	26975502	23459830	23459830	19698289	19698289	18585056	154478
12_Malvids	345	Camelina sativa	ftp://ftp.ncbi.nlm.nih.gov/genomes/all/GCF/000/633/955/GCF_000633955.1_Cs	SAMN02644653	PRJNA264159	GCA_000633955.1	Chromosome	37.4934	chromosome 1:NC_025685.1/CM002729.1; chromosome 2:NC_025686.1/CM002730.1; chromosome 3:NC_025687.1/CM002731.1; chromosome 4:NC_025688.1/CM002732.1; chromosome 5:NC_025689.1/CM002733.1; chromosome 6:NC_025690.1/CM002734.1; chromosome 7:NC_025691.1/CM002735.1; chromosome 8:NC_025692.1/CM002736.1; chromosome 9:NC_025693.1/CM002737.1; chromosome 10:NC_025694.1/CM002738.1; chromosome 11:NC_025695.1/CM…	JFZQ01	2014-04-17T00:00:00Z	ftp://ftp.ncbi.nlm.nih.gov/genomes/all/GCA/000/633/955/GCA_000633955.1_Cs	641356059	37212	17235.2	286	49703607	38094978	34971402	33044737	31758599	30099736	29110212	27720346	26391736	23241285	200
12_Malvids	346	Capsella bursa-pastoris	ftp://ftp.ncbi.nlm.nih.gov/genomes/all/GCA/001/974/645/GCA_001974645.1_C_bursa_pastoris_nuclear_genome_v1	SAMN05991519	PRJNA352734	GCA_001974645.1	Scaffold	33.4		MPGU01	2017-01-29T00:00:00Z	ftp://ftp.ncbi.nlm.nih.gov/genomes/all/GCA/001/974/645/GCA_001974645.1_C_bursa_pastoris_nuclear_genome_v1	268430517	8186	32791.4	1731	4117863	1775740	1304507	990264	797821	627605	486845	361253	206491	39736	203
12_Malvids	347	Capsella rubella	ftp://ftp.ncbi.nlm.nih.gov/genomes/all/GCF/000/375/325/GCF_000375325.1_Caprub1_0	SAMN02981483	PRJNA13878	GCA_000375325.1	Scaffold	35.9		ANNY01	2013-04-19T00:00:00Z	ftp://ftp.ncbi.nlm.nih.gov/genomes/all/GCA/000/375/325/GCA_000375325.1_Caprub1_0	133063876	773	172140	3105	19566579	19566579	17303919	16577294	16577294	15040190	14994381	14066726	13709650	13324298	200
12_Malvids	348	Barbarea vulgaris	ftp://ftp.ncbi.nlm.nih.gov/genomes/all/GCA/001/920/985/GCA_001920985.1_ASM192098v1	SAMN04979170	PRJNA321292	GCA_001920985.1	Scaffold	0		LXTM01	2016-12-23T00:00:00Z	ftp://ftp.ncbi.nlm.nih.gov/genomes/all/GCA/001/920/985/GCA_001920985.1_ASM192098v1	167352128	7810	21427.9	7120	521601	169502	123536	97111	73507	56351	41415	29985	19996	9461	348
12_Malvids	349	Leavenworthia alabamica	ftp://ftp.ncbi.nlm.nih.gov/genomes/all/GCA/000/411/055/GCA_000411055.1_VEGI_LA_v_1.0	SAMN02146679	PRJNA202983	GCA_000411055.1	Scaffold	35.4		ASXC01	2013-06-12T00:00:00Z	ftp://ftp.ncbi.nlm.nih.gov/genomes/all/GCA/000/411/055/GCA_000411055.1_VEGI_LA_v_1.0	173431618	11715	14804.2	2202	514026	256905	176974	128635	95941	71084	50328	33604	20272	8999	201
12_Malvids	350	Nasturtium officinale	ftp://ftp.ncbi.nlm.nih.gov/genomes/all/GCA/900/406/445/GCA_900406445.1_ASM90040644v1	SAMEA4640853	PRJEB26555	GCA_900406445.1	Scaffold	35.1		OVAZ01	2019-06-13T00:00:00Z	ftp://ftp.ncbi.nlm.nih.gov/genomes/all/GCA/900/406/445/GCA_900406445.1_ASM90040644v1	216122097	10793	20024.3	3616	701824	340506	238942	171646	127705	94231	67793	45760	25621	11234	200
12_Malvids	351	Noccaea caerulescens	ftp://ftp.ncbi.nlm.nih.gov/genomes/all/GCA/900/406/465/GCA_900406465.1_ASM90040646v1	SAMEA4640854	PRJEB26555	GCA_900406465.1	Scaffold	37		OVBC01	2019-06-13T00:00:00Z	ftp://ftp.ncbi.nlm.nih.gov/genomes/all/GCA/900/406/465/GCA_900406465.1_ASM90040646v1	140791915	19808	7107.83	2399	599363	70338	47984	34885	26786	20261	14744	10467	6657	3354	200
12_Malvids	352	Noccaea goesingensis	ftp://ftp.ncbi.nlm.nih.gov/genomes/all/GCA/900/406/475/GCA_900406475.1_ASM90040647v1	SAMEA4640855	PRJEB26555	GCA_900406475.1	Scaffold	36		OVBG01	2019-06-13T00:00:00Z	ftp://ftp.ncbi.nlm.nih.gov/genomes/all/GCA/900/406/475/GCA_900406475.1_ASM90040647v1	150323284	183017	821.36	567	19776	3177	2204	1693	1349	1083	868	685	520	372	200
12_Malvids	353	Raparia bulbosa	ftp://ftp.ncbi.nlm.nih.gov/genomes/all/GCA/900/406/535/GCA_900406535.1_ASM90040653v1	SAMEA4640861	PRJEB26555	GCA_900406535.1	Scaffold	36.9		OVBJ01	2019-06-13T00:00:00Z	ftp://ftp.ncbi.nlm.nih.gov/genomes/all/GCA/900/406/535/GCA_900406535.1_ASM90040653v1	152783568	13874	11012.2	3614	1026842	119071	70664	52951	40993	30980	23525	16869	11124	5773	201
12_Malvids	354	Conringia planisiliqua	ftp://ftp.ncbi.nlm.nih.gov/genomes/all/GCA/900/108/845/GCA_900108845.1_Conringia_planisiliqua.v1	SAMEA4523483	PRJEB16743	GCA_900108845.1	Scaffold	35.4		FNXX01	2016-12-31T00:00:00Z	ftp://ftp.ncbi.nlm.nih.gov/genomes/all/GCA/900/108/845/GCA_900108845.1_Conringia_planisiliqua.v1	184155600	705	261214	14163	15208799	12270481	12074320	11279646	9129079	8882589	7283533	6868915	3088089	728039	899
12_Malvids	355	Cochlearia officinalis	ftp://ftp.ncbi.nlm.nih.gov/genomes/all/GCA/900/406/305/GCA_900406305.1_ASM90040630v1	SAMEA4640841	PRJEB26555	GCA_900406305.1	Scaffold	32.9		OVAT01	2019-06-13T00:00:00Z	ftp://ftp.ncbi.nlm.nih.gov/genomes/all/GCA/900/406/305/GCA_900406305.1_ASM90040630v1	164468807	128459	1280.32	814	51143	6283	4250	3188	2462	1937	1512	1161	854	560	200
12_Malvids	356	Crucihimalaya himalaica	ftp://ftp.ncbi.nlm.nih.gov/genomes/all/GCA/004/349/715/GCA_004349715.1_ASM434971v1	SAMN10882650	PRJNA521295	GCA_004349715.1	Scaffold	35.8		SMJT01	2019-03-14T00:00:00Z	ftp://ftp.ncbi.nlm.nih.gov/genomes/all/GCA/004/349/715/GCA_004349715.1_ASM434971v1	234721433	582	403301	6113	8343586	5653575	3875614	3086055	2623092	2088603	1487080	1045032	800405	470087	975
12_Malvids	357	Erysimum cheiri	ftp://ftp.ncbi.nlm.nih.gov/genomes/all/GCA/900/406/345/GCA_900406345.1_ASM90040634v1	SAMEA4640844	PRJEB26555	GCA_900406345.1	Scaffold	35.6		OVAQ01	2019-06-13T00:00:00Z	ftp://ftp.ncbi.nlm.nih.gov/genomes/all/GCA/900/406/345/GCA_900406345.1_ASM90040634v1	147320935	37531	3925.31	1601	180769	39649	25984	18215	13157	9413	6852	4797	3133	1674	200
12_Malvids	358	Erysimum pusillum	ftp://ftp.ncbi.nlm.nih.gov/genomes/all/GCA/900/406/355/GCA_900406355.1_ASM90040635v1	SAMEA4640864	PRJEB26555	GCA_900406355.1	Scaffold	35		OVBW01	2019-06-13T00:00:00Z	ftp://ftp.ncbi.nlm.nih.gov/genomes/all/GCA/900/406/355/GCA_900406355.1_ASM90040635v1	184063902	47441	3879.85	2148	475165	25302	15942	11732	9112	7133	5562	4198	2956	1789	200
12_Malvids	359	Euclidium syriacum	ftp://ftp.ncbi.nlm.nih.gov/genomes/all/GCA/900/116/095/GCA_900116095.1_Euclidium_syriacum.MPIPZ.v1	SAMEA4527703	PRJEB16743	GCA_900116095.1	Scaffold	35.4		FPAK01	2016-12-31T00:00:00Z	ftp://ftp.ncbi.nlm.nih.gov/genomes/all/GCA/900/116/095/GCA_900116095.1_Euclidium_syriacum.MPIPZ.v1	229211023	160	1.43257e+06	17266	22393718	21647715	20634497	18658056	18124089	17487894	12628956	9524166	5418917	3808307	1257
12_Malvids	360	Eutrema heterophyllum	ftp://ftp.ncbi.nlm.nih.gov/genomes/all/GCA/002/933/915/GCA_002933915.1_ASM293391v1	SAMN08200758	PRJNA419026	GCA_002933915.1	Scaffold	37		PKMM01	2018-02-20T00:00:00Z	ftp://ftp.ncbi.nlm.nih.gov/genomes/all/GCA/002/933/915/GCA_002933915.1_ASM293391v1	348971089	57686	6049.49	402	3499761	1550124	1096436	881896	707349	561173	451122	316110	180797	9616	200
12_Malvids	361	Eutrema salsugineum	ftp://ftp.ncbi.nlm.nih.gov/genomes/all/GCF/000/478/725/GCF_000478725.1_Eutsalg1_0	SAMN02981485	PRJNA73205	GCA_000478725.1	Scaffold	37.9		ANOA01	2013-10-22T00:00:00Z	ftp://ftp.ncbi.nlm.nih.gov/genomes/all/GCA/000/478/725/GCA_000478725.1_Eutsalg1_0	243110105	638	381050	5555	21755756	19988679	17905225	16133619	14695327	13441892	12873599	10886113	9343251	5603101	1028
12_Malvids	362	Eutrema yunnanense	ftp://ftp.ncbi.nlm.nih.gov/genomes/all/GCA/002/933/935/GCA_002933935.1_ASM293393v1	SAMN08200759	PRJNA419026	GCA_002933935.1	Scaffold	35.4		PKML01	2018-02-20T00:00:00Z	ftp://ftp.ncbi.nlm.nih.gov/genomes/all/GCA/002/933/935/GCA_002933935.1_ASM293393v1	415364017	78020	5323.81	516	2070594	1151524	789399	631788	485317	371182	269890	178268	87133	2025	200
12_Malvids	363	Iberis amara	ftp://ftp.ncbi.nlm.nih.gov/genomes/all/GCA/900/406/375/GCA_900406375.1_ASM90040637v1	SAMEA4640846	PRJEB26555	GCA_900406375.1	Scaffold	33.5		OVAV01	2019-06-13T00:00:00Z	ftp://ftp.ncbi.nlm.nih.gov/genomes/all/GCA/900/406/375/GCA_900406375.1_ASM90040637v1	361245353	191171	1889.65	1053	51860	11469	7866	5772	4391	3351	2546	1882	1316	797	200
12_Malvids	364	Iberis pinnata	ftp://ftp.ncbi.nlm.nih.gov/genomes/all/GCA/900/406/425/GCA_900406425.1_ASM90040642v1	SAMEA4640847	PRJEB26555	GCA_900406425.1	Scaffold	35.2		OVBE01	2019-06-13T00:00:00Z	ftp://ftp.ncbi.nlm.nih.gov/genomes/all/GCA/900/406/425/GCA_900406425.1_ASM90040642v1	686283031	141542	4848.62	2168	106062	37088	26255	19511	14765	11126	8215	5864	3880	2155	200
12_Malvids	365	Isatis lusitanica	ftp://ftp.ncbi.nlm.nih.gov/genomes/all/GCA/900/406/415/GCA_900406415.1_ASM90040641v1	SAMEA4640848	PRJEB26555	GCA_900406415.1	Scaffold	36.5		OVBB01	2019-06-13T00:00:00Z	ftp://ftp.ncbi.nlm.nih.gov/genomes/all/GCA/900/406/415/GCA_900406415.1_ASM90040641v1	203919019	61090	3338.01	1829	351282	26442	14199	10155	7780	6068	4718	3572	2524	1514	200
12_Malvids	366	Isatis tinctoria	ftp://ftp.ncbi.nlm.nih.gov/genomes/all/GCA/900/406/385/GCA_900406385.1_ASM90040638v1	SAMEA4640849	PRJEB26555	GCA_900406385.1	Scaffold	36.1		OVBD01	2019-06-13T00:00:00Z	ftp://ftp.ncbi.nlm.nih.gov/genomes/all/GCA/900/406/385/GCA_900406385.1_ASM90040638v1	244177058	106900	2284.16	1283	72003	12978	8993	6837	5339	4168	3196	2378	1673	999	200
12_Malvids	367	Kernera saxatilis	ftp://ftp.ncbi.nlm.nih.gov/genomes/all/GCA/900/406/395/GCA_900406395.1_ASM90040639v1	SAMEA4640850	PRJEB26555	GCA_900406395.1	Scaffold	35.9		OVAY01	2019-06-13T00:00:00Z	ftp://ftp.ncbi.nlm.nih.gov/genomes/all/GCA/900/406/395/GCA_900406395.1_ASM90040639v1	143969369	18372	7836.35	1104	219404	97188	69339	54033	43568	34026	25941	18717	11964	5194	200
12_Malvids	368	Lepidium africanum	ftp://ftp.ncbi.nlm.nih.gov/genomes/all/GCA/900/406/405/GCA_900406405.1_ASM90040640v1	SAMEA4640851	PRJEB26555	GCA_900406405.1	Scaffold	34.9		OVAX01	2019-06-13T00:00:00Z	ftp://ftp.ncbi.nlm.nih.gov/genomes/all/GCA/900/406/405/GCA_900406405.1_ASM90040640v1	225262187	17445	12912.7	2692	288720	120747	86505	69334	56572	44485	34828	25685	16503	7604	200
12_Malvids	369	Lepidium aucheri	ftp://ftp.ncbi.nlm.nih.gov/genomes/all/GCA/900/406/435/GCA_900406435.1_ASM90040643v1	SAMEA4640863	PRJEB26555	GCA_900406435.1	Scaffold	35.4		OVBA01	2019-06-13T00:00:00Z	ftp://ftp.ncbi.nlm.nih.gov/genomes/all/GCA/900/406/435/GCA_900406435.1_ASM90040643v1	332062533	31191	10646.1	3802	302244	73581	53719	42534	34426	27634	21910	16541	11407	5961	200
12_Malvids	370	Sisymbrium altissimum	ftp://ftp.ncbi.nlm.nih.gov/genomes/all/GCA/900/406/495/GCA_900406495.1_ASM90040649v1	SAMEA4640859	PRJEB26555	GCA_900406495.1	Scaffold	35.9		OVBI01	2019-06-13T00:00:00Z	ftp://ftp.ncbi.nlm.nih.gov/genomes/all/GCA/900/406/495/GCA_900406495.1_ASM90040649v1	178647359	14597	12238.6	2216	535969	181617	120349	84193	62158	46252	35070	25398	16099	7831	200
12_Malvids	371	Sisymbrium irio	ftp://ftp.ncbi.nlm.nih.gov/genomes/all/GCA/000/411/075/GCA_000411075.1_VEGI_SI_v_1.0	SAMN02152446	PRJNA202979	GCA_000411075.1	Scaffold	38		ASZH01	2013-06-13T00:00:00Z	ftp://ftp.ncbi.nlm.nih.gov/genomes/all/GCA/000/411/075/GCA_000411075.1_VEGI_SI_v_1.0	245550082	21357	11497.4	574	1746141	877202	471213	287400	191732	144321	105552	72672	42259	12456	201
12_Malvids	372	Macropodium nivale	ftp://ftp.ncbi.nlm.nih.gov/genomes/all/GCA/900/406/455/GCA_900406455.1_ASM90040645v1	SAMEA4640852	PRJEB26555	GCA_900406455.1	Scaffold	37.9		OVBF01	2019-06-13T00:00:00Z	ftp://ftp.ncbi.nlm.nih.gov/genomes/all/GCA/900/406/455/GCA_900406455.1_ASM90040645v1	300734812	122604	2452.9	733	161710	29383	19278	13804	10169	7547	5386	3560	2046	893	200
12_Malvids	373	Pseudoturritis turrita	ftp://ftp.ncbi.nlm.nih.gov/genomes/all/GCA/900/406/555/GCA_900406555.1_ASM90040655v1	SAMEA4643371	PRJEB26555	GCA_900406555.1	Contig	37.4		OVBL01	2019-06-13T00:00:00Z	ftp://ftp.ncbi.nlm.nih.gov/genomes/all/GCA/900/406/555/GCA_900406555.1_ASM90040655v1	321562673	1111	289435	108179	9515526	5547866	2419955	1339468	952259	748954	569540	429081	303030	180974	354
[truncated: 86 more rows]

## Sheet: 1a Data source
Supplementary Table 1a The basic information of plant genome
[truncated: 460 more rows]

## Sheet: 1b Species taxonomy
Supplementary Table 1b The plant species taxonomy
[truncated: 461 more rows]

[truncated: 3 more sheets: 1c Genome size and quality , 1c TE classes, 1d Gene statistics]
